# Supplementary material
Source: MDPI journal article supplement (https://www.mdpi.com/2073-445X/10/12/1393)
Supplement: s1 [file s1]

**Table S1.** Plant species removed from lists due to erroneous inclusion in databases as alien species to South Africa.

| <b>Plant species</b>             | <b>Database</b> |
|----------------------------------|-----------------|
| <i>Afrocarpus falcatus</i>       | iNaturalist     |
| <i>Aloe arborescens</i>          | iNaturalist     |
| <i>Campylopus introflexus</i>    | iNaturalist     |
| <i>Commelina benghalensis</i>    | SAPIA           |
| <i>Gomphocarpus physocarpus</i>  | iNaturalist     |
| <i>Ipomoea cairica</i>           | SAPIA           |
| <i>Leucadendron salicifolium</i> | iNaturalist     |
| <i>Ludwigia palustris</i>        | SAPIA           |
| <i>Melinis repens</i>            | iNaturalist     |
| <i>Mentha longifolia</i>         | SAPIA           |
| <i>Nidorella ivifolia</i>        | iNaturalist     |
| <i>Podocarpus elongatus</i>      | iNaturalist     |
| <i>Protea aurea</i>              | iNaturalist     |
| <i>Protea burchellii</i>         | iNaturalist     |
| <i>Protea eximia</i>             | iNaturalist     |
| <i>Protea laticolor</i>          | iNaturalist     |
| <i>Protea laurifolia</i>         | iNaturalist     |
| <i>Protea neriifolia</i>         | iNaturalist     |
| <i>Rubus immixtus</i>            | SAPIA           |
| <i>Samolus porosus</i>           | SAPIA           |
| <i>Senecio pterophorus</i>       | iNaturalist     |
| <i>Solanum retroflexum</i>       | SAPIA           |
| <i>Tecomaria capensis</i>        | iNaturalist     |
| <i>Thunbergia alata</i>          | iNaturalist     |

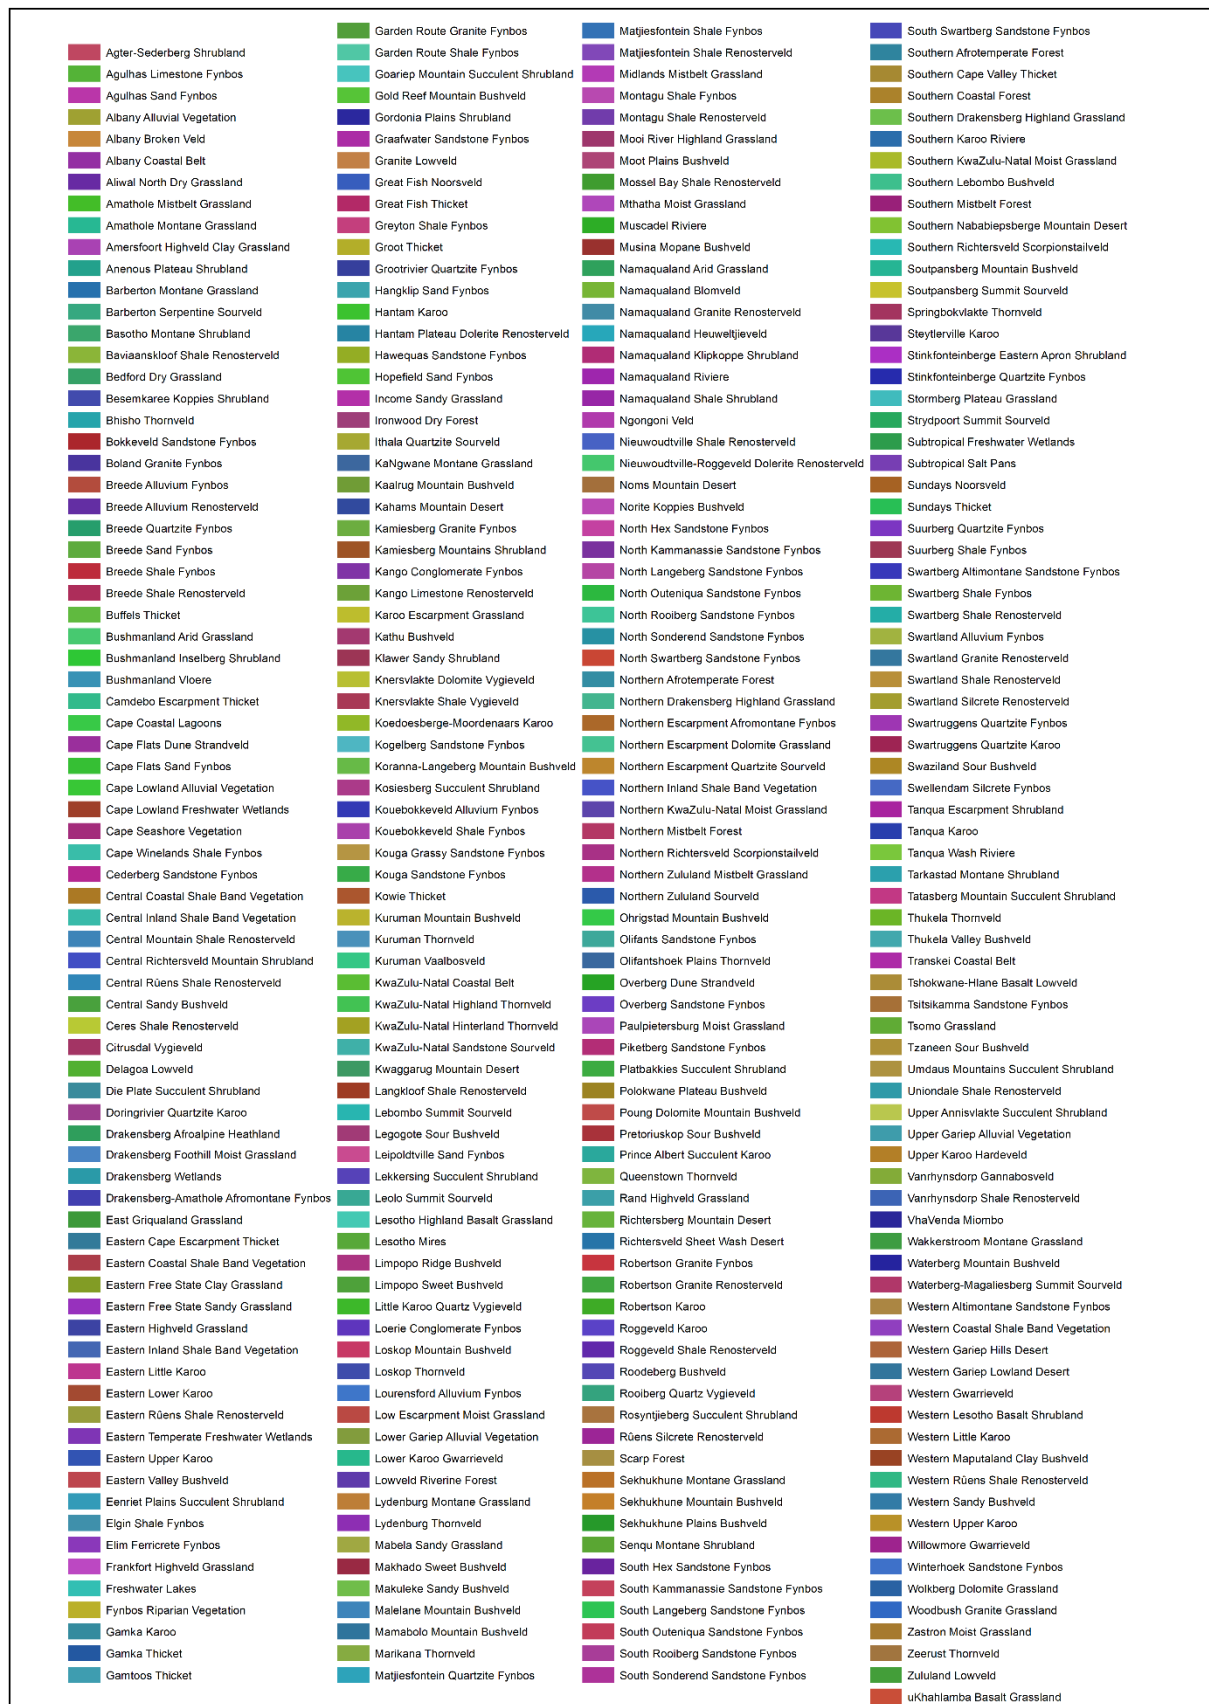

**Table S3.** Mountain surveys that have been conducted across the six mountain ranges in South Africa.

| <b>Mountain range</b>           | <b>Survey</b>                                                           | <b>Focused alien plant survey</b> | <b>Number of alien plants recorded</b> |
|---------------------------------|-------------------------------------------------------------------------|-----------------------------------|----------------------------------------|
| Entire mountain ranges          | SAPIA [55]                                                              | Yes                               | 588                                    |
|                                 | iNaturalist [43]                                                        | No                                | 239                                    |
| Across two ranges (SGE and EGE) | Great Escarpment Biodiversity Research Programme data mobilisation [40] | No                                | 160                                    |
| <b>Tropical Cuestas</b>         |                                                                         |                                   |                                        |
| Soutpansberg                    | Ruwanza and Mhlongo [56]                                                | Yes                               | 6                                      |
| <b>Eastern Great Escarpment</b> |                                                                         |                                   |                                        |
| Sneeuberg Centre                | Clark et al. [57]                                                       | No                                | 107                                    |
|                                 | Clark et al. [58]                                                       | No                                | 37                                     |
|                                 | Clark et al. [59]                                                       | No                                | 105                                    |
| Mountain Zebra National Park    | Brown and Bezuidenhout [60]                                             | No                                | 7                                      |
|                                 | Bezuidenhout and Brown [61]                                             | No                                | 4                                      |
|                                 | Brown and Bezuidenhout [62]                                             | No                                | 2                                      |
| Drakensberg Mountain Centre     | Carbutt and Edwards [27]                                                | No                                | 166                                    |
|                                 | Carbutt et al. [28]                                                     | Yes                               | 50                                     |
|                                 | Kalwijn et al. [29]                                                     | No                                | 106                                    |
|                                 | Steyn et al. [63]                                                       | Yes                               | 152                                    |
|                                 | Turner [15]                                                             | Yes                               | 63                                     |
|                                 | Popp and Kalwijn [64]                                                   | Yes                               | 52                                     |
| Mpumalanga/Limpopo Escarpment   | Clark et al. (2018), unpublished                                        | No                                | 224                                    |
| Platberg                        | Brand et al. [65]                                                       | Yes                               | 2                                      |
|                                 | Brand et al. [66]                                                       | Yes                               | 22                                     |
| Ngeli mountains                 | Grieve and Downs [67]                                                   | No                                | 65                                     |
| Stormberg                       | Clark and Vidal (2015), unpublished                                     | No                                | 39                                     |
| Great Winterberg                | Clark et al. [68]                                                       | No                                | 127                                    |
| Amatola Mountains (Hogsback)    | Omar et al. [69]                                                        | No                                | 3                                      |

| Southern Great Escarpment   |                             |     |                                                            |
|-----------------------------|-----------------------------|-----|------------------------------------------------------------|
| Hantam mountain             | Hoffman and Merwe [70]      | No  | 2                                                          |
| Hantam–Roggeveld            | Clark et al. [71]           | No  | 23                                                         |
| Nuweveldberge               | Clark et al. [72]           | No  | 36                                                         |
| Cape Fold Mountains         |                             |     |                                                            |
| Cape Peninsula Mountains    | Moll and Trinder-Smith [73] | Yes | 14                                                         |
| Agter-Groenberg conservancy | Walton [74]                 | No  | 3                                                          |
| Tsitsikamma                 | Kraaij and Baard [75]       | Yes | 109 (across all surveyed area and not just mountain areas) |

**Table S6.** The most abundant alien plants found across all six mountain ranges in South Africa (see Figure 1).

| Alien plant species                              | Growth form             | Seed dispersal                     | Maximum Height (metres) | Mountain Range | Native range                              | Climatic zones                                                | Frost tolerance                                          | References |
|--------------------------------------------------|-------------------------|------------------------------------|-------------------------|----------------|-------------------------------------------|---------------------------------------------------------------|----------------------------------------------------------|------------|
| <i>Acacia cyclops</i>                            | shrub or small tree     | birds, mammals                     | 4                       | WGE            | Australia                                 | Semi-arid subtropical                                         | Slight                                                   | [76]       |
| <i>Acacia dealbata</i>                           | evergreen tree or shrub | birds, insects, water              | 30                      | EGE            | Australia                                 | Cool to warm subhumid and occasionally humid                  | Yes (20 - 80 days)                                       | [76]       |
| <i>Acacia mearnsii</i>                           | shrub or tree           | birds, mammals, water              | 10                      | EGE, CFM       | Australia                                 | Temperate and subtropical lowlands to tropical highlands      | High altitude genotypes can tolerate frost               | [76]       |
| <i>Acacia melanoxylon</i>                        | tree                    | birds, water                       | 20                      | CFM,           | Australia                                 | Cool and warm humid and warm sub-humid                        | Yes (1 – 40 days)                                        | [76]       |
| <i>Acacia saligna</i>                            | tree                    | birds, water                       | 8                       | CFM            | Australia                                 | Warm, sub-humid, humid and higher rainfall parts of semi-arid | Introduced areas exhibits frost sensitivity (1 – 6 days) | [76]       |
| <i>Atriplex lindleyi</i><br><i>subsp inflata</i> | woody shrub             | water                              | 0.3                     | SGE            | Australia                                 | Arid                                                          | Yes                                                      | [77, 78]   |
| <i>Atriplex nummularia</i>                       | woody shrub             | seed production limited, livestock | 3                       | WGE, SGE       | Australia                                 | Temperate and sub-tropical                                    | Yes                                                      | [79]       |
| <i>Caesalpinia decapetala</i>                    | evergreen shrub         | birds, mammals, water, livestock   | 4                       | EGE            | India, Sri Lanka                          | Sub-humid to humid                                            | Yes                                                      | [76]       |
| <i>Campuloclinium macrocephalum</i>              | erect, perennial herb   | wind                               | 3                       | TC             | South America, Central America and Mexico | Wide range of climates                                        | Yes                                                      | [80, 81]   |

|                                 |                        |                                                 |      |                   |                                         |                                           |                      |      |
|---------------------------------|------------------------|-------------------------------------------------|------|-------------------|-----------------------------------------|-------------------------------------------|----------------------|------|
| <i>Conyza bonariensis</i>       | annual herb            | wind                                            | 0.75 | CGM               | Temperate South America                 | Warm temperate, sub-tropical and tropical | Yes                  | [76] |
| <i>Conyza sumatrensis</i>       | annual herb            | wind                                            | 2    | CGM               | Sub-tropical South America              | Warm temperate, sub-tropical and tropical | Yes                  | [76] |
| <i>Erodium cicutarium</i>       | annual herb            | birds, mammals, ballistic, water, rodents, ants | 0.6  | SGE               | Europe, North Africa and temperate Asia | Wide range of climates                    | Yes                  | [76] |
| <i>Eucalyptus camaldulensis</i> | tree                   | wind                                            | 20   | WGE               | Australia                               | Warm to hot, sub-humid to semi-arid       | Yes (Up to 40 days)  | [76] |
| <i>Jacaranda mimosifolia</i>    | tree                   | wind, water                                     | 20   | TC                | Central and eastern South America       | Temperate mesothermal and tropical        | No                   | [76] |
| <i>Lantana camara</i>           | erect, perennial shrub | birds, water                                    | 2    | EGE               | Central and South America               | Wide range of climates                    | No                   | [76] |
| <i>Melia azedarach</i>          | tree                   | birds                                           | 12   | TC, CGM           | Asia                                    | Wide range of climates                    | Older trees tolerant | [76] |
| <i>Nicotiana glauca</i>         | small tree or shrub    | water                                           | 7    | WGE, SGE          | Argentina, Bolivia                      | Semi-arid                                 | No                   | [76] |
| <i>Opuntia ficus-indica</i>     | perennial shrub        | birds, mammals                                  | 5    | TC, CFM, SGE, CGM | Uncertain, likely Mexico                | Wide range of climates                    | Yes                  | [76] |
| <i>Pinus pinaster</i>           | tree                   | wind                                            | 35   | CFM,              | Mediterranean                           | Wide range of climates                    | Yes                  | [76] |
| <i>Prosopis glandulosa</i>      | tree                   | birds, livestock, mammals, water                | 15   | WGE, SGE, CGM     | North America to Mexico                 | Wide range of climates                    | Yes                  | [76] |

|                            |                     |                                  |    |     |                                         |                             |        |          |
|----------------------------|---------------------|----------------------------------|----|-----|-----------------------------------------|-----------------------------|--------|----------|
| <i>Ricinus communis</i>    | small tree or shrub | ballistic, birds, mammals        | 12 | TC  | North-Eastern Africa                    | Warm-temperate and tropical | No     | [76]     |
| <i>Rubus fruticosus</i>    | deciduous shrub     | birds, livestock, mammals, water | 3  | CFM | Europe                                  | Temperate                   | Yes    | [76]     |
| <i>Salix babylonica</i>    | tree                | water, wind                      | 25 | EGE | China                                   | Temperate                   | Yes    | [82, 83] |
| <i>Solanum mauritianum</i> | small tree or shrub | birds, mammals                   | 10 | EGE | Argentina, Brazil, Uruguay and Paraguay | Wide range of climates      | Slight | [76]     |

---
