# Supplementary material
Source: MDPI journal article supplement (https://www.mdpi.com/2073-445X/10/12/1393)
Supplement: s1 [file s1]

## Sheet: EGE
Vegetation type	Polygon square kilometres (POLYSQKM)	Book code	Conservation status	Biome	Bioregion	Protection status
Aggeneys Gravel Vygieveld	0.208000000000000	SKr 19	Least threatened	Succulent Karoo Biome	Richtersveld Bioregion	Not protected
Aggeneys Gravel Vygieveld	6.057800000000000	SKr 19	Least threatened	Succulent Karoo Biome	Richtersveld Bioregion	Not protected
Aggeneys Gravel Vygieveld	0.246900000000000	SKr 19	Least threatened	Succulent Karoo Biome	Richtersveld Bioregion	Not protected
Aggeneys Gravel Vygieveld	0.190600000000000	SKr 19	Least threatened	Succulent Karoo Biome	Richtersveld Bioregion	Not protected
Aggeneys Gravel Vygieveld	19.710899999999999	SKr 19	Least threatened	Succulent Karoo Biome	Richtersveld Bioregion	Not protected
Aggeneys Gravel Vygieveld	1.043000000000000	SKr 19	Least threatened	Succulent Karoo Biome	Richtersveld Bioregion	Not protected
Aggeneys Gravel Vygieveld	0.093100000000000	SKr 19	Least threatened	Succulent Karoo Biome	Richtersveld Bioregion	Not protected
Aggeneys Gravel Vygieveld	0.317700000000000	SKr 19	Least threatened	Succulent Karoo Biome	Richtersveld Bioregion	Not protected
Aggeneys Gravel Vygieveld	3.424800000000000	SKr 19	Least threatened	Succulent Karoo Biome	Richtersveld Bioregion	Not protected
Aggeneys Gravel Vygieveld	4.892200000000000	SKr 19	Least threatened	Succulent Karoo Biome	Richtersveld Bioregion	Not protected
Aggeneys Gravel Vygieveld	1.831600000000000	SKr 19	Least threatened	Succulent Karoo Biome	Richtersveld Bioregion	Not protected
Aggeneys Gravel Vygieveld	11.286300000000001	SKr 19	Least threatened	Succulent Karoo Biome	Richtersveld Bioregion	Not protected
Aggeneys Gravel Vygieveld	0.969200000000000	SKr 19	Least threatened	Succulent Karoo Biome	Richtersveld Bioregion	Not protected
Aggeneys Gravel Vygieveld	0.541500000000000	SKr 19	Least threatened	Succulent Karoo Biome	Richtersveld Bioregion	Not protected
Aggeneys Gravel Vygieveld	0.761000000000000	SKr 19	Least threatened	Succulent Karoo Biome	Richtersveld Bioregion	Not protected
Aggeneys Gravel Vygieveld	0.307300000000000	SKr 19	Least threatened	Succulent Karoo Biome	Richtersveld Bioregion	Not protected
Aggeneys Gravel Vygieveld	1.923500000000000	SKr 19	Least threatened	Succulent Karoo Biome	Richtersveld Bioregion	Not protected
Aggeneys Gravel Vygieveld	0.064600000000000	SKr 19	Least threatened	Succulent Karoo Biome	Richtersveld Bioregion	Not protected
Aggeneys Gravel Vygieveld	2.819800000000000	SKr 19	Least threatened	Succulent Karoo Biome	Richtersveld Bioregion	Not protected
Aggeneys Gravel Vygieveld	0.427000000000000	SKr 19	Least threatened	Succulent Karoo Biome	Richtersveld Bioregion	Not protected
Aggeneys Gravel Vygieveld	3.270900000000000	SKr 19	Least threatened	Succulent Karoo Biome	Richtersveld Bioregion	Not protected
Aggeneys Gravel Vygieveld	1.835400000000000	SKr 19	Least threatened	Succulent Karoo Biome	Richtersveld Bioregion	Not protected
Agter-Sederberg Shrubland	323.587699999999984	SKv 3	Least threatened	Succulent Karoo Biome	Rainshadow Valley Karoo Bioregion	Poorly protected
Agter-Sederberg Shrubland	7.197600000000000	SKv 3	Least threatened	Succulent Karoo Biome	Rainshadow Valley Karoo Bioregion	Poorly protected
Agter-Sederberg Shrubland	7.276000000000000	SKv 3	Least threatened	Succulent Karoo Biome	Rainshadow Valley Karoo Bioregion	Poorly protected
Agter-Sederberg Shrubland	2.135500000000000	SKv 3	Least threatened	Succulent Karoo Biome	Rainshadow Valley Karoo Bioregion	Poorly protected
Agter-Sederberg Shrubland	6.360200000000000	SKv 3	Least threatened	Succulent Karoo Biome	Rainshadow Valley Karoo Bioregion	Poorly protected
Agter-Sederberg Shrubland	381.243600000000015	SKv 3	Least threatened	Succulent Karoo Biome	Rainshadow Valley Karoo Bioregion	Poorly protected
Agter-Sederberg Shrubland	173.802899999999994	SKv 3	Least threatened	Succulent Karoo Biome	Rainshadow Valley Karoo Bioregion	Poorly protected
Agter-Sederberg Shrubland	1.423200000000000	SKv 3	Least threatened	Succulent Karoo Biome	Rainshadow Valley Karoo Bioregion	Poorly protected
Agter-Sederberg Shrubland	2.947100000000000	SKv 3	Least threatened	Succulent Karoo Biome	Rainshadow Valley Karoo Bioregion	Poorly protected
Agulhas Limestone Fynbos	5.835800000000000	FFl 1	Least threatened	Fynbos Biome	South Coast Fynbos Bioregion	Poorly protected
Agulhas Limestone Fynbos	150.541100000000000	FFl 1	Least threatened	Fynbos Biome	South Coast Fynbos Bioregion	Poorly protected
Agulhas Limestone Fynbos	10.555700000000000	FFl 1	Least threatened	Fynbos Biome	South Coast Fynbos Bioregion	Poorly protected
Agulhas Limestone Fynbos	0.071000000000000	FFl 1	Least threatened	Fynbos Biome	South Coast Fynbos Bioregion	Poorly protected
Agulhas Limestone Fynbos	0.337100000000000	FFl 1	Least threatened	Fynbos Biome	South Coast Fynbos Bioregion	Poorly protected
Agulhas Limestone Fynbos	1.003300000000000	FFl 1	Least threatened	Fynbos Biome	South Coast Fynbos Bioregion	Poorly protected
Agulhas Limestone Fynbos	0.639500000000000	FFl 1	Least threatened	Fynbos Biome	South Coast Fynbos Bioregion	Poorly protected
Agulhas Limestone Fynbos	0.533800000000000	FFl 1	Least threatened	Fynbos Biome	South Coast Fynbos Bioregion	Poorly protected
Agulhas Limestone Fynbos	4.955900000000000	FFl 1	Least threatened	Fynbos Biome	South Coast Fynbos Bioregion	Poorly protected
Agulhas Limestone Fynbos	1.468900000000000	FFl 1	Least threatened	Fynbos Biome	South Coast Fynbos Bioregion	Poorly protected
Agulhas Limestone Fynbos	43.463400000000000	FFl 1	Least threatened	Fynbos Biome	South Coast Fynbos Bioregion	Poorly protected
Agulhas Limestone Fynbos	19.093699999999998	FFl 1	Least threatened	Fynbos Biome	South Coast Fynbos Bioregion	Poorly protected
Agulhas Limestone Fynbos	16.863199999999999	FFl 1	Least threatened	Fynbos Biome	South Coast Fynbos Bioregion	Poorly protected
Agulhas Limestone Fynbos	0.062700000000000	FFl 1	Least threatened	Fynbos Biome	South Coast Fynbos Bioregion	Poorly protected
Agulhas Limestone Fynbos	0.307200000000000	FFl 1	Least threatened	Fynbos Biome	South Coast Fynbos Bioregion	Poorly protected
Agulhas Limestone Fynbos	14.083700000000000	FFl 1	Least threatened	Fynbos Biome	South Coast Fynbos Bioregion	Poorly protected
Agulhas Limestone Fynbos	0.147000000000000	FFl 1	Least threatened	Fynbos Biome	South Coast Fynbos Bioregion	Poorly protected
Agulhas Limestone Fynbos	8.222500000000000	FFl 1	Least threatened	Fynbos Biome	South Coast Fynbos Bioregion	Poorly protected
Agulhas Limestone Fynbos	3.930600000000000	FFl 1	Least threatened	Fynbos Biome	South Coast Fynbos Bioregion	Poorly protected
Agulhas Limestone Fynbos	11.720700000000001	FFl 1	Least threatened	Fynbos Biome	South Coast Fynbos Bioregion	Poorly protected
Agulhas Limestone Fynbos	0.661200000000000	FFl 1	Least threatened	Fynbos Biome	South Coast Fynbos Bioregion	Poorly protected
Agulhas Sand Fynbos	172.057199999999995	FFd 7	Vulnerable	Fynbos Biome	South Coast Fynbos Bioregion	Poorly protected
Agulhas Sand Fynbos	1.208500000000000	FFd 7	Vulnerable	Fynbos Biome	South Coast Fynbos Bioregion	Poorly protected
Agulhas Sand Fynbos	20.105300000000000	FFd 7	Vulnerable	Fynbos Biome	South Coast Fynbos Bioregion	Poorly protected
Agulhas Sand Fynbos	0.119200000000000	FFd 7	Vulnerable	Fynbos Biome	South Coast Fynbos Bioregion	Poorly protected
Agulhas Sand Fynbos	2.943500000000000	FFd 7	Vulnerable	Fynbos Biome	South Coast Fynbos Bioregion	Poorly protected
Agulhas Sand Fynbos	6.490000000000000	FFd 7	Vulnerable	Fynbos Biome	South Coast Fynbos Bioregion	Poorly protected
Agulhas Sand Fynbos	0.687300000000000	FFd 7	Vulnerable	Fynbos Biome	South Coast Fynbos Bioregion	Poorly protected
Agulhas Sand Fynbos	0.067200000000000	FFd 7	Vulnerable	Fynbos Biome	South Coast Fynbos Bioregion	Poorly protected
Agulhas Sand Fynbos	0.370600000000000	FFd 7	Vulnerable	Fynbos Biome	South Coast Fynbos Bioregion	Poorly protected
Agulhas Sand Fynbos	1.153900000000000	FFd 7	Vulnerable	Fynbos Biome	South Coast Fynbos Bioregion	Poorly protected
Agulhas Sand Fynbos	3.573900000000000	FFd 7	Vulnerable	Fynbos Biome	South Coast Fynbos Bioregion	Poorly protected
Agulhas Sand Fynbos	1.596600000000000	FFd 7	Vulnerable	Fynbos Biome	South Coast Fynbos Bioregion	Poorly protected
Agulhas Sand Fynbos	0.684700000000000	FFd 7	Vulnerable	Fynbos Biome	South Coast Fynbos Bioregion	Poorly protected
Agulhas Sand Fynbos	0.096000000000000	FFd 7	Vulnerable	Fynbos Biome	South Coast Fynbos Bioregion	Poorly protected
Agulhas Sand Fynbos	0.472300000000000	FFd 7	Vulnerable	Fynbos Biome	South Coast Fynbos Bioregion	Poorly protected
Agulhas Sand Fynbos	0.247500000000000	FFd 7	Vulnerable	Fynbos Biome	South Coast Fynbos Bioregion	Poorly protected
Agulhas Sand Fynbos	0.794900000000000	FFd 7	Vulnerable	Fynbos Biome	South Coast Fynbos Bioregion	Poorly protected
Agulhas Sand Fynbos	0.068300000000000	FFd 7	Vulnerable	Fynbos Biome	South Coast Fynbos Bioregion	Poorly protected
Agulhas Sand Fynbos	0.310700000000000	FFd 7	Vulnerable	Fynbos Biome	South Coast Fynbos Bioregion	Poorly protected
Agulhas Sand Fynbos	0.145800000000000	FFd 7	Vulnerable	Fynbos Biome	South Coast Fynbos Bioregion	Poorly protected
Agulhas Sand Fynbos	0.356200000000000	FFd 7	Vulnerable	Fynbos Biome	South Coast Fynbos Bioregion	Poorly protected
Agulhas Sand Fynbos	0.232200000000000	FFd 7	Vulnerable	Fynbos Biome	South Coast Fynbos Bioregion	Poorly protected
Agulhas Sand Fynbos	0.264100000000000	FFd 7	Vulnerable	Fynbos Biome	South Coast Fynbos Bioregion	Poorly protected
Agulhas Sand Fynbos	0.141600000000000	FFd 7	Vulnerable	Fynbos Biome	South Coast Fynbos Bioregion	Poorly protected
Agulhas Sand Fynbos	0.320800000000000	FFd 7	Vulnerable	Fynbos Biome	South Coast Fynbos Bioregion	Poorly protected
Agulhas Sand Fynbos	1.310700000000000	FFd 7	Vulnerable	Fynbos Biome	South Coast Fynbos Bioregion	Poorly protected
Agulhas Sand Fynbos	0.709800000000000	FFd 7	Vulnerable	Fynbos Biome	South Coast Fynbos Bioregion	Poorly protected
Agulhas Sand Fynbos	0.232300000000000	FFd 7	Vulnerable	Fynbos Biome	South Coast Fynbos Bioregion	Poorly protected
Agulhas Sand Fynbos	13.023300000000001	FFd 7	Vulnerable	Fynbos Biome	South Coast Fynbos Bioregion	Poorly protected
Agulhas Sand Fynbos	0.490000000000000	FFd 7	Vulnerable	Fynbos Biome	South Coast Fynbos Bioregion	Poorly protected
Agulhas Sand Fynbos	0.222200000000000	FFd 7	Vulnerable	Fynbos Biome	South Coast Fynbos Bioregion	Poorly protected
Agulhas Sand Fynbos	0.094600000000000	FFd 7	Vulnerable	Fynbos Biome	South Coast Fynbos Bioregion	Poorly protected
Albany Alluvial Vegetation	0.360100000000000	AZa 6	Endangered	Azonal Vegetation	Alluvial Vegetation	Poorly protected
Albany Alluvial Vegetation	0.324000000000000	AZa 6	Endangered	Azonal Vegetation	Alluvial Vegetation	Poorly protected
Albany Alluvial Vegetation	0.681200000000000	AZa 6	Endangered	Azonal Vegetation	Alluvial Vegetation	Poorly protected
Albany Alluvial Vegetation	350.427000000000021	AZa 6	Endangered	Azonal Vegetation	Alluvial Vegetation	Poorly protected
Albany Alluvial Vegetation	0.408600000000000	AZa 6	Endangered	Azonal Vegetation	Alluvial Vegetation	Poorly protected
Albany Alluvial Vegetation	0.182700000000000	AZa 6	Endangered	Azonal Vegetation	Alluvial Vegetation	Poorly protected
Albany Alluvial Vegetation	1.085100000000000	AZa 6	Endangered	Azonal Vegetation	Alluvial Vegetation	Poorly protected
Albany Alluvial Vegetation	0.540200000000000	AZa 6	Endangered	Azonal Vegetation	Alluvial Vegetation	Poorly protected
Albany Alluvial Vegetation	1.122700000000000	AZa 6	Endangered	Azonal Vegetation	Alluvial Vegetation	Poorly protected
Albany Alluvial Vegetation	8.173100000000000	AZa 6	Endangered	Azonal Vegetation	Alluvial Vegetation	Poorly protected
Albany Alluvial Vegetation	0.085500000000000	AZa 6	Endangered	Azonal Vegetation	Alluvial Vegetation	Poorly protected
Albany Alluvial Vegetation	7.114300000000000	AZa 6	Endangered	Azonal Vegetation	Alluvial Vegetation	Poorly protected
Albany Alluvial Vegetation	0.100200000000000	AZa 6	Endangered	Azonal Vegetation	Alluvial Vegetation	Poorly protected
Albany Alluvial Vegetation	26.278300000000002	AZa 6	Endangered	Azonal Vegetation	Alluvial Vegetation	Poorly protected
Albany Alluvial Vegetation	20.454499999999999	AZa 6	Endangered	Azonal Vegetation	Alluvial Vegetation	Poorly protected
Albany Alluvial Vegetation	2.639000000000000	AZa 6	Endangered	Azonal Vegetation	Alluvial Vegetation	Poorly protected
Albany Alluvial Vegetation	57.518799999999999	AZa 6	Endangered	Azonal Vegetation	Alluvial Vegetation	Poorly protected
Albany Alluvial Vegetation	104.034599999999998	AZa 6	Endangered	Azonal Vegetation	Alluvial Vegetation	Poorly protected
Albany Alluvial Vegetation	0.567200000000000	AZa 6	Endangered	Azonal Vegetation	Alluvial Vegetation	Poorly protected
Albany Alluvial Vegetation	1.890800000000000	AZa 6	Endangered	Azonal Vegetation	Alluvial Vegetation	Poorly protected
Albany Broken Veld	45.784300000000002	NKl 4	Least threatened	Nama-Karoo Biome	Lower Karoo Bioregion	Hardly protected
Albany Broken Veld	20.891500000000001	NKl 4	Least threatened	Nama-Karoo Biome	Lower Karoo Bioregion	Hardly protected
Albany Broken Veld	23.384100000000000	NKl 4	Least threatened	Nama-Karoo Biome	Lower Karoo Bioregion	Hardly protected
Albany Broken Veld	0.085800000000000	NKl 4	Least threatened	Nama-Karoo Biome	Lower Karoo Bioregion	Hardly protected
Albany Broken Veld	0.087500000000000	NKl 4	Least threatened	Nama-Karoo Biome	Lower Karoo Bioregion	Hardly protected
Albany Broken Veld	0.129400000000000	NKl 4	Least threatened	Nama-Karoo Biome	Lower Karoo Bioregion	Hardly protected
Albany Broken Veld	0.104700000000000	NKl 4	Least threatened	Nama-Karoo Biome	Lower Karoo Bioregion	Hardly protected
Albany Broken Veld	33.036700000000003	NKl 4	Least threatened	Nama-Karoo Biome	Lower Karoo Bioregion	Hardly protected
Albany Broken Veld	1157.036200000000008	NKl 4	Least threatened	Nama-Karoo Biome	Lower Karoo Bioregion	Hardly protected
Albany Broken Veld	211.201300000000003	NKl 4	Least threatened	Nama-Karoo Biome	Lower Karoo Bioregion	Hardly protected
Albany Broken Veld	17.909900000000000	NKl 4	Least threatened	Nama-Karoo Biome	Lower Karoo Bioregion	Hardly protected
Albany Broken Veld	0.282700000000000	NKl 4	Least threatened	Nama-Karoo Biome	Lower Karoo Bioregion	Hardly protected
Albany Broken Veld	0.814700000000000	NKl 4	Least threatened	Nama-Karoo Biome	Lower Karoo Bioregion	Hardly protected
Albany Broken Veld	1.244900000000000	NKl 4	Least threatened	Nama-Karoo Biome	Lower Karoo Bioregion	Hardly protected
Albany Broken Veld	2.661600000000000	NKl 4	Least threatened	Nama-Karoo Biome	Lower Karoo Bioregion	Hardly protected
Albany Broken Veld	0.669500000000000	NKl 4	Least threatened	Nama-Karoo Biome	Lower Karoo Bioregion	Hardly protected
Albany Broken Veld	0.252100000000000	NKl 4	Least threatened	Nama-Karoo Biome	Lower Karoo Bioregion	Hardly protected
Albany Broken Veld	0.198400000000000	NKl 4	Least threatened	Nama-Karoo Biome	Lower Karoo Bioregion	Hardly protected
Albany Broken Veld	0.703500000000000	NKl 4	Least threatened	Nama-Karoo Biome	Lower Karoo Bioregion	Hardly protected
Albany Broken Veld	104.368799999999993	NKl 4	Least threatened	Nama-Karoo Biome	Lower Karoo Bioregion	Hardly protected
Albany Broken Veld	0.139900000000000	NKl 4	Least threatened	Nama-Karoo Biome	Lower Karoo Bioregion	Hardly protected
Albany Broken Veld	0.145200000000000	NKl 4	Least threatened	Nama-Karoo Biome	Lower Karoo Bioregion	Hardly protected
Albany Broken Veld	0.197900000000000	NKl 4	Least threatened	Nama-Karoo Biome	Lower Karoo Bioregion	Hardly protected
Albany Broken Veld	0.447700000000000	NKl 4	Least threatened	Nama-Karoo Biome	Lower Karoo Bioregion	Hardly protected
Albany Broken Veld	0.093200000000000	NKl 4	Least threatened	Nama-Karoo Biome	Lower Karoo Bioregion	Hardly protected
Albany Broken Veld	0.095300000000000	NKl 4	Least threatened	Nama-Karoo Biome	Lower Karoo Bioregion	Hardly protected
Albany Broken Veld	12.574700000000000	NKl 4	Least threatened	Nama-Karoo Biome	Lower Karoo Bioregion	Hardly protected
Albany Broken Veld	10.791499999999999	NKl 4	Least threatened	Nama-Karoo Biome	Lower Karoo Bioregion	Hardly protected
Albany Broken Veld	0.680300000000000	NKl 4	Least threatened	Nama-Karoo Biome	Lower Karoo Bioregion	Hardly protected
Albany Broken Veld	0.288800000000000	NKl 4	Least threatened	Nama-Karoo Biome	Lower Karoo Bioregion	Hardly protected
Albany Broken Veld	0.298700000000000	NKl 4	Least threatened	Nama-Karoo Biome	Lower Karoo Bioregion	Hardly protected
Albany Broken Veld	0.090900000000000	NKl 4	Least threatened	Nama-Karoo Biome	Lower Karoo Bioregion	Hardly protected
Albany Broken Veld	0.313900000000000	NKl 4	Least threatened	Nama-Karoo Biome	Lower Karoo Bioregion	Hardly protected
Albany Broken Veld	0.624900000000000	NKl 4	Least threatened	Nama-Karoo Biome	Lower Karoo Bioregion	Hardly protected
Albany Broken Veld	0.291200000000000	NKl 4	Least threatened	Nama-Karoo Biome	Lower Karoo Bioregion	Hardly protected
Albany Coastal Belt	155.178200000000004	AT 9	Least threatened	Albany Thicket Biome	Albany Thicket	Poorly protected
Albany Coastal Belt	70.052599999999998	AT 9	Least threatened	Albany Thicket Biome	Albany Thicket	Poorly protected
Albany Coastal Belt	76.627300000000005	AT 9	Least threatened	Albany Thicket Biome	Albany Thicket	Poorly protected
Albany Coastal Belt	142.488000000000000	AT 9	Least threatened	Albany Thicket Biome	Albany Thicket	Poorly protected
Albany Coastal Belt	291.681899999999985	AT 9	Least threatened	Albany Thicket Biome	Albany Thicket	Poorly protected
Albany Coastal Belt	611.688400000000001	AT 9	Least threatened	Albany Thicket Biome	Albany Thicket	Poorly protected
Albany Coastal Belt	70.375299999999996	AT 9	Least threatened	Albany Thicket Biome	Albany Thicket	Poorly protected
Albany Coastal Belt	20.522099999999998	AT 9	Least threatened	Albany Thicket Biome	Albany Thicket	Poorly protected
Albany Coastal Belt	401.232100000000003	AT 9	Least threatened	Albany Thicket Biome	Albany Thicket	Poorly protected
Albany Coastal Belt	24.904499999999999	AT 9	Least threatened	Albany Thicket Biome	Albany Thicket	Poorly protected
Albany Coastal Belt	0.844900000000000	AT 9	Least threatened	Albany Thicket Biome	Albany Thicket	Poorly protected
Albany Coastal Belt	5.976800000000000	AT 9	Least threatened	Albany Thicket Biome	Albany Thicket	Poorly protected
Albany Coastal Belt	10.790400000000000	AT 9	Least threatened	Albany Thicket Biome	Albany Thicket	Poorly protected
Albany Coastal Belt	200.905499999999989	AT 9	Least threatened	Albany Thicket Biome	Albany Thicket	Poorly protected
Albany Coastal Belt	10.248699999999999	AT 9	Least threatened	Albany Thicket Biome	Albany Thicket	Poorly protected
Albany Coastal Belt	783.973700000000008	AT 9	Least threatened	Albany Thicket Biome	Albany Thicket	Poorly protected
Albany Coastal Belt	56.695200000000000	AT 9	Least threatened	Albany Thicket Biome	Albany Thicket	Poorly protected
Albany Coastal Belt	19.927800000000001	AT 9	Least threatened	Albany Thicket Biome	Albany Thicket	Poorly protected
Albany Coastal Belt	183.085800000000006	AT 9	Least threatened	Albany Thicket Biome	Albany Thicket	Poorly protected
Albany Coastal Belt	6.795700000000000	AT 9	Least threatened	Albany Thicket Biome	Albany Thicket	Poorly protected
Albany Coastal Belt	1.370500000000000	AT 9	Least threatened	Albany Thicket Biome	Albany Thicket	Poorly protected
Albany Coastal Belt	0.460000000000000	AT 9	Least threatened	Albany Thicket Biome	Albany Thicket	Poorly protected
Albany Coastal Belt	1.800900000000000	AT 9	Least threatened	Albany Thicket Biome	Albany Thicket	Poorly protected
Albany Coastal Belt	0.353400000000000	AT 9	Least threatened	Albany Thicket Biome	Albany Thicket	Poorly protected
Albany Coastal Belt	0.115200000000000	AT 9	Least threatened	Albany Thicket Biome	Albany Thicket	Poorly protected
Albany Coastal Belt	119.304699999999997	AT 9	Least threatened	Albany Thicket Biome	Albany Thicket	Poorly protected
Albany Coastal Belt	1.092500000000000	AT 9	Least threatened	Albany Thicket Biome	Albany Thicket	Poorly protected
Albany Coastal Belt	0.511600000000000	AT 9	Least threatened	Albany Thicket Biome	Albany Thicket	Poorly protected
Albany Coastal Belt	0.150200000000000	AT 9	Least threatened	Albany Thicket Biome	Albany Thicket	Poorly protected
Albany Dune Strandveld	1.080100000000000	AZs 2	Least threatened	Azonal Vegetation	Eastern Strandveld	Well protected
Albany Dune Strandveld	0.900400000000000	AZs 2	Least threatened	Azonal Vegetation	Eastern Strandveld	Well protected
Albany Dune Strandveld	0.128300000000000	AZs 2	Least threatened	Azonal Vegetation	Eastern Strandveld	Well protected
Albany Dune Strandveld	7.531100000000000	AZs 2	Least threatened	Azonal Vegetation	Eastern Strandveld	Well protected
Albany Dune Strandveld	0.068100000000000	AZs 2	Least threatened	Azonal Vegetation	Eastern Strandveld	Well protected
Albany Dune Strandveld	0.238200000000000	AZs 2	Least threatened	Azonal Vegetation	Eastern Strandveld	Well protected
Albany Dune Strandveld	0.111500000000000	AZs 2	Least threatened	Azonal Vegetation	Eastern Strandveld	Well protected
Albany Dune Strandveld	7.303600000000000	AZs 2	Least threatened	Azonal Vegetation	Eastern Strandveld	Well protected
Albany Dune Strandveld	1.061200000000000	AZs 2	Least threatened	Azonal Vegetation	Eastern Strandveld	Well protected
Albany Dune Strandveld	1.945400000000000	AZs 2	Least threatened	Azonal Vegetation	Eastern Strandveld	Well protected
Albany Dune Strandveld	0.595000000000000	AZs 2	Least threatened	Azonal Vegetation	Eastern Strandveld	Well protected
Albany Dune Strandveld	1.310100000000000	AZs 2	Least threatened	Azonal Vegetation	Eastern Strandveld	Well protected
Albany Dune Strandveld	11.023700000000000	AZs 2	Least threatened	Azonal Vegetation	Eastern Strandveld	Well protected
Albany Dune Strandveld	1.508300000000000	AZs 2	Least threatened	Azonal Vegetation	Eastern Strandveld	Well protected
Albany Dune Strandveld	1.994900000000000	AZs 2	Least threatened	Azonal Vegetation	Eastern Strandveld	Well protected
Albany Dune Strandveld	2.230600000000000	AZs 2	Least threatened	Azonal Vegetation	Eastern Strandveld	Well protected
Albany Dune Strandveld	3.458900000000000	AZs 2	Least threatened	Azonal Vegetation	Eastern Strandveld	Well protected
Albany Dune Strandveld	1.845800000000000	AZs 2	Least threatened	Azonal Vegetation	Eastern Strandveld	Well protected
Albany Dune Strandveld	3.442400000000000	AZs 2	Least threatened	Azonal Vegetation	Eastern Strandveld	Well protected
Albany Dune Strandveld	1.376400000000000	AZs 2	Least threatened	Azonal Vegetation	Eastern Strandveld	Well protected
Albany Dune Strandveld	4.530900000000000	AZs 2	Least threatened	Azonal Vegetation	Eastern Strandveld	Well protected
Albany Dune Strandveld	4.012800000000000	AZs 2	Least threatened	Azonal Vegetation	Eastern Strandveld	Well protected
Albany Dune Strandveld	5.888800000000000	AZs 2	Least threatened	Azonal Vegetation	Eastern Strandveld	Well protected
Albany Dune Strandveld	9.523400000000001	AZs 2	Least threatened	Azonal Vegetation	Eastern Strandveld	Well protected
Albany Dune Strandveld	0.066900000000000	AZs 2	Least threatened	Azonal Vegetation	Eastern Strandveld	Well protected
Albany Dune Strandveld	6.889800000000000	AZs 2	Least threatened	Azonal Vegetation	Eastern Strandveld	Well protected
Albany Dune Strandveld	2.776700000000000	AZs 2	Least threatened	Azonal Vegetation	Eastern Strandveld	Well protected
Albany Dune Strandveld	50.492100000000001	AZs 2	Least threatened	Azonal Vegetation	Eastern Strandveld	Well protected
Albany Dune Strandveld	16.428699999999999	AZs 2	Least threatened	Azonal Vegetation	Eastern Strandveld	Well protected
Albany Dune Strandveld	14.642200000000001	AZs 2	Least threatened	Azonal Vegetation	Eastern Strandveld	Well protected
Albany Dune Strandveld	0.210400000000000	AZs 2	Least threatened	Azonal Vegetation	Eastern Strandveld	Well protected
Albany Dune Strandveld	0.131900000000000	AZs 2	Least threatened	Azonal Vegetation	Eastern Strandveld	Well protected
Albany Dune Strandveld	0.452900000000000	AZs 2	Least threatened	Azonal Vegetation	Eastern Strandveld	Well protected
Albany Dune Strandveld	1.758300000000000	AZs 2	Least threatened	Azonal Vegetation	Eastern Strandveld	Well protected
Albany Dune Strandveld	0.106200000000000	AZs 2	Least threatened	Azonal Vegetation	Eastern Strandveld	Well protected
Albany Dune Strandveld	0.440600000000000	AZs 2	Least threatened	Azonal Vegetation	Eastern Strandveld	Well protected
Albany Dune Strandveld	2.641700000000000	AZs 2	Least threatened	Azonal Vegetation	Eastern Strandveld	Well protected
Albany Dune Strandveld	0.230900000000000	AZs 2	Least threatened	Azonal Vegetation	Eastern Strandveld	Well protected
Albertinia Sand Fynbos	52.982900000000001	FFd 9	Vulnerable	Fynbos Biome	South Coast Fynbos Bioregion	Poorly protected
Albertinia Sand Fynbos	277.990299999999991	FFd 9	Vulnerable	Fynbos Biome	South Coast Fynbos Bioregion	Poorly protected
Albertinia Sand Fynbos	1.671400000000000	FFd 9	Vulnerable	Fynbos Biome	South Coast Fynbos Bioregion	Poorly protected
Albertinia Sand Fynbos	0.927100000000000	FFd 9	Vulnerable	Fynbos Biome	South Coast Fynbos Bioregion	Poorly protected
Albertinia Sand Fynbos	0.582400000000000	FFd 9	Vulnerable	Fynbos Biome	South Coast Fynbos Bioregion	Poorly protected
Albertinia Sand Fynbos	4.640400000000000	FFd 9	Vulnerable	Fynbos Biome	South Coast Fynbos Bioregion	Poorly protected
Albertinia Sand Fynbos	1.099900000000000	FFd 9	Vulnerable	Fynbos Biome	South Coast Fynbos Bioregion	Poorly protected
Albertinia Sand Fynbos	12.723000000000001	FFd 9	Vulnerable	Fynbos Biome	South Coast Fynbos Bioregion	Poorly protected
Albertinia Sand Fynbos	1.069400000000000	FFd 9	Vulnerable	Fynbos Biome	South Coast Fynbos Bioregion	Poorly protected
Albertinia Sand Fynbos	11.391500000000001	FFd 9	Vulnerable	Fynbos Biome	South Coast Fynbos Bioregion	Poorly protected
Albertinia Sand Fynbos	0.802600000000000	FFd 9	Vulnerable	Fynbos Biome	South Coast Fynbos Bioregion	Poorly protected
Albertinia Sand Fynbos	1.783500000000000	FFd 9	Vulnerable	Fynbos Biome	South Coast Fynbos Bioregion	Poorly protected
Albertinia Sand Fynbos	1.849000000000000	FFd 9	Vulnerable	Fynbos Biome	South Coast Fynbos Bioregion	Poorly protected
Albertinia Sand Fynbos	67.433300000000003	FFd 9	Vulnerable	Fynbos Biome	South Coast Fynbos Bioregion	Poorly protected
Albertinia Sand Fynbos	22.671900000000001	FFd 9	Vulnerable	Fynbos Biome	South Coast Fynbos Bioregion	Poorly protected
Albertinia Sand Fynbos	1.419400000000000	FFd 9	Vulnerable	Fynbos Biome	South Coast Fynbos Bioregion	Poorly protected
Albertinia Sand Fynbos	50.723900000000000	FFd 9	Vulnerable	Fynbos Biome	South Coast Fynbos Bioregion	Poorly protected
Albertinia Sand Fynbos	0.674200000000000	FFd 9	Vulnerable	Fynbos Biome	South Coast Fynbos Bioregion	Poorly protected
Albertinia Sand Fynbos	93.089799999999997	FFd 9	Vulnerable	Fynbos Biome	South Coast Fynbos Bioregion	Poorly protected
Albertinia Sand Fynbos	1.026300000000000	FFd 9	Vulnerable	Fynbos Biome	South Coast Fynbos Bioregion	Poorly protected
Albertinia Sand Fynbos	1.747200000000000	FFd 9	Vulnerable	Fynbos Biome	South Coast Fynbos Bioregion	Poorly protected
Albertinia Sand Fynbos	1.828100000000000	FFd 9	Vulnerable	Fynbos Biome	South Coast Fynbos Bioregion	Poorly protected
Albertinia Sand Fynbos	57.916899999999998	FFd 9	Vulnerable	Fynbos Biome	South Coast Fynbos Bioregion	Poorly protected
Albertinia Sand Fynbos	25.425699999999999	FFd 9	Vulnerable	Fynbos Biome	South Coast Fynbos Bioregion	Poorly protected
Albertinia Sand Fynbos	5.107300000000000	FFd 9	Vulnerable	Fynbos Biome	South Coast Fynbos Bioregion	Poorly protected
Albertinia Sand Fynbos	9.149400000000000	FFd 9	Vulnerable	Fynbos Biome	South Coast Fynbos Bioregion	Poorly protected
Albertinia Sand Fynbos	0.494300000000000	FFd 9	Vulnerable	Fynbos Biome	South Coast Fynbos Bioregion	Poorly protected
Alexander Bay Coastal Duneveld	17.001600000000000	Dn 1	Least threatened	Desert Biome	Southern Namib Desert Bioregion	Not protected
Algoa Dune Strandveld	25.154000000000000	AZs 1	Least threatened	Azonal Vegetation	Eastern Strandveld	Poorly protected
Algoa Dune Strandveld	32.610999999999997	AZs 1	Least threatened	Azonal Vegetation	Eastern Strandveld	Poorly protected
Algoa Dune Strandveld	1.681400000000000	AZs 1	Least threatened	Azonal Vegetation	Eastern Strandveld	Poorly protected
Algoa Dune Strandveld	0.142200000000000	AZs 1	Least threatened	Azonal Vegetation	Eastern Strandveld	Poorly protected
Algoa Dune Strandveld	127.327600000000004	AZs 1	Least threatened	Azonal Vegetation	Eastern Strandveld	Poorly protected
Algoa Dune Strandveld	25.147700000000000	AZs 1	Least threatened	Azonal Vegetation	Eastern Strandveld	Poorly protected
Algoa Dune Strandveld	2.101100000000000	AZs 1	Least threatened	Azonal Vegetation	Eastern Strandveld	Poorly protected
Algoa Dune Strandveld	0.749600000000000	AZs 1	Least threatened	Azonal Vegetation	Eastern Strandveld	Poorly protected
Algoa Dune Strandveld	1.780700000000000	AZs 1	Least threatened	Azonal Vegetation	Eastern Strandveld	Poorly protected
Algoa Dune Strandveld	1.570400000000000	AZs 1	Least threatened	Azonal Vegetation	Eastern Strandveld	Poorly protected
Algoa Dune Strandveld	63.276200000000003	AZs 1	Least threatened	Azonal Vegetation	Eastern Strandveld	Poorly protected
Algoa Sandstone Fynbos	340.972600000000000	FFs 29	Endangered	Fynbos Biome	Eastern Fynbos-Renosterveld Bioregion	Poorly protected
Aliwal North Dry Grassland	5114.531100000000151	Gh 2	Least threatened	Grassland Biome	Dry Highveld Grassland Bioregion	Hardly protected
Aliwal North Dry Grassland	2.291000000000000	Gh 2	Least threatened	Grassland Biome	Dry Highveld Grassland Bioregion	Hardly protected
Aliwal North Dry Grassland	1.236100000000000	Gh 2	Least threatened	Grassland Biome	Dry Highveld Grassland Bioregion	Hardly protected
Aliwal North Dry Grassland	8.668600000000000	Gh 2	Least threatened	Grassland Biome	Dry Highveld Grassland Bioregion	Hardly protected
Aliwal North Dry Grassland	28.453099999999999	Gh 2	Least threatened	Grassland Biome	Dry Highveld Grassland Bioregion	Hardly protected
Aliwal North Dry Grassland	1635.019399999999905	Gh 2	Least threatened	Grassland Biome	Dry Highveld Grassland Bioregion	Hardly protected
Aliwal North Dry Grassland	7.926200000000000	Gh 2	Least threatened	Grassland Biome	Dry Highveld Grassland Bioregion	Hardly protected
Aliwal North Dry Grassland	124.846100000000007	Gh 2	Least threatened	Grassland Biome	Dry Highveld Grassland Bioregion	Hardly protected
Aliwal North Dry Grassland	227.305299999999988	Gh 2	Least threatened	Grassland Biome	Dry Highveld Grassland Bioregion	Hardly protected
Aliwal North Dry Grassland	11.795199999999999	Gh 2	Least threatened	Grassland Biome	Dry Highveld Grassland Bioregion	Hardly protected
Amathole Mistbelt Grassland	2.381500000000000	Gd 2	Least threatened	Grassland Biome	Drakensberg Grassland Bioregion	Not protected
Amathole Mistbelt Grassland	0.204200000000000	Gd 2	Least threatened	Grassland Biome	Drakensberg Grassland Bioregion	Not protected
Amathole Mistbelt Grassland	83.389899999999997	Gd 2	Least threatened	Grassland Biome	Drakensberg Grassland Bioregion	Not protected
Amathole Mistbelt Grassland	28.828700000000001	Gd 2	Least threatened	Grassland Biome	Drakensberg Grassland Bioregion	Not protected
Amathole Mistbelt Grassland	15.424200000000001	Gd 2	Least threatened	Grassland Biome	Drakensberg Grassland Bioregion	Not protected
Amathole Mistbelt Grassland	1.363100000000000	Gd 2	Least threatened	Grassland Biome	Drakensberg Grassland Bioregion	Not protected
Amathole Mistbelt Grassland	9.693700000000000	Gd 2	Least threatened	Grassland Biome	Drakensberg Grassland Bioregion	Not protected
Amathole Mistbelt Grassland	3.581400000000000	Gd 2	Least threatened	Grassland Biome	Drakensberg Grassland Bioregion	Not protected
Amathole Mistbelt Grassland	7.967400000000000	Gd 2	Least threatened	Grassland Biome	Drakensberg Grassland Bioregion	Not protected
Amathole Mistbelt Grassland	5.437500000000000	Gd 2	Least threatened	Grassland Biome	Drakensberg Grassland Bioregion	Not protected
Amathole Montane Grassland	2574.601099999999860	Gd 1	Least threatened	Grassland Biome	Drakensberg Grassland Bioregion	Poorly protected
Amathole Montane Grassland	8.190200000000001	Gd 1	Least threatened	Grassland Biome	Drakensberg Grassland Bioregion	Poorly protected
Amathole Montane Grassland	42.040700000000001	Gd 1	Least threatened	Grassland Biome	Drakensberg Grassland Bioregion	Poorly protected
Amathole Montane Grassland	16.057200000000002	Gd 1	Least threatened	Grassland Biome	Drakensberg Grassland Bioregion	Poorly protected
Amathole Montane Grassland	4.495400000000000	Gd 1	Least threatened	Grassland Biome	Drakensberg Grassland Bioregion	Poorly protected
Amathole Montane Grassland	1497.297399999999925	Gd 1	Least threatened	Grassland Biome	Drakensberg Grassland Bioregion	Poorly protected
Amathole Montane Grassland	6.338200000000000	Gd 1	Least threatened	Grassland Biome	Drakensberg Grassland Bioregion	Poorly protected
Amathole Montane Grassland	2.559900000000000	Gd 1	Least threatened	Grassland Biome	Drakensberg Grassland Bioregion	Poorly protected
Amathole Montane Grassland	0.346800000000000	Gd 1	Least threatened	Grassland Biome	Drakensberg Grassland Bioregion	Poorly protected
Amathole Montane Grassland	2.072500000000000	Gd 1	Least threatened	Grassland Biome	Drakensberg Grassland Bioregion	Poorly protected
Amathole Montane Grassland	0.097800000000000	Gd 1	Least threatened	Grassland Biome	Drakensberg Grassland Bioregion	Poorly protected
Amathole Montane Grassland	0.787500000000000	Gd 1	Least threatened	Grassland Biome	Drakensberg Grassland Bioregion	Poorly protected
Amathole Montane Grassland	0.415700000000000	Gd 1	Least threatened	Grassland Biome	Drakensberg Grassland Bioregion	Poorly protected
Amathole Montane Grassland	15.531100000000000	Gd 1	Least threatened	Grassland Biome	Drakensberg Grassland Bioregion	Poorly protected
Amathole Montane Grassland	104.891300000000001	Gd 1	Least threatened	Grassland Biome	Drakensberg Grassland Bioregion	Poorly protected
Amathole Montane Grassland	0.455000000000000	Gd 1	Least threatened	Grassland Biome	Drakensberg Grassland Bioregion	Poorly protected
Amathole Montane Grassland	0.790300000000000	Gd 1	Least threatened	Grassland Biome	Drakensberg Grassland Bioregion	Poorly protected
Amathole Montane Grassland	0.189400000000000	Gd 1	Least threatened	Grassland Biome	Drakensberg Grassland Bioregion	Poorly protected
Amathole Montane Grassland	0.235800000000000	Gd 1	Least threatened	Grassland Biome	Drakensberg Grassland Bioregion	Poorly protected
Amathole Montane Grassland	0.973200000000000	Gd 1	Least threatened	Grassland Biome	Drakensberg Grassland Bioregion	Poorly protected
Amathole Montane Grassland	0.473400000000000	Gd 1	Least threatened	Grassland Biome	Drakensberg Grassland Bioregion	Poorly protected
Amathole Montane Grassland	0.382600000000000	Gd 1	Least threatened	Grassland Biome	Drakensberg Grassland Bioregion	Poorly protected
Amathole Montane Grassland	0.055100000000000	Gd 1	Least threatened	Grassland Biome	Drakensberg Grassland Bioregion	Poorly protected
Amathole Montane Grassland	4.238600000000000	Gd 1	Least threatened	Grassland Biome	Drakensberg Grassland Bioregion	Poorly protected
Amathole Montane Grassland	3.424800000000000	Gd 1	Least threatened	Grassland Biome	Drakensberg Grassland Bioregion	Poorly protected
Amathole Montane Grassland	2.263400000000000	Gd 1	Least threatened	Grassland Biome	Drakensberg Grassland Bioregion	Poorly protected
Amathole Montane Grassland	0.383300000000000	Gd 1	Least threatened	Grassland Biome	Drakensberg Grassland Bioregion	Poorly protected
Amathole Montane Grassland	0.186700000000000	Gd 1	Least threatened	Grassland Biome	Drakensberg Grassland Bioregion	Poorly protected
Amathole Montane Grassland	0.488200000000000	Gd 1	Least threatened	Grassland Biome	Drakensberg Grassland Bioregion	Poorly protected
Amathole Montane Grassland	0.486700000000000	Gd 1	Least threatened	Grassland Biome	Drakensberg Grassland Bioregion	Poorly protected
Amathole Montane Grassland	23.001700000000000	Gd 1	Least threatened	Grassland Biome	Drakensberg Grassland Bioregion	Poorly protected
Amathole Montane Grassland	0.087100000000000	Gd 1	Least threatened	Grassland Biome	Drakensberg Grassland Bioregion	Poorly protected
Amathole Montane Grassland	2.715400000000000	Gd 1	Least threatened	Grassland Biome	Drakensberg Grassland Bioregion	Poorly protected
Amathole Montane Grassland	0.458500000000000	Gd 1	Least threatened	Grassland Biome	Drakensberg Grassland Bioregion	Poorly protected
Amathole Montane Grassland	0.396100000000000	Gd 1	Least threatened	Grassland Biome	Drakensberg Grassland Bioregion	Poorly protected
Amathole Montane Grassland	20.019700000000000	Gd 1	Least threatened	Grassland Biome	Drakensberg Grassland Bioregion	Poorly protected
Amathole Montane Grassland	0.344800000000000	Gd 1	Least threatened	Grassland Biome	Drakensberg Grassland Bioregion	Poorly protected
Amathole Montane Grassland	2.228600000000000	Gd 1	Least threatened	Grassland Biome	Drakensberg Grassland Bioregion	Poorly protected
Amathole Montane Grassland	8.686400000000001	Gd 1	Least threatened	Grassland Biome	Drakensberg Grassland Bioregion	Poorly protected
Amathole Montane Grassland	0.221400000000000	Gd 1	Least threatened	Grassland Biome	Drakensberg Grassland Bioregion	Poorly protected
Amathole Montane Grassland	6.541900000000000	Gd 1	Least threatened	Grassland Biome	Drakensberg Grassland Bioregion	Poorly protected
Amathole Montane Grassland	1.007700000000000	Gd 1	Least threatened	Grassland Biome	Drakensberg Grassland Bioregion	Poorly protected
Amathole Montane Grassland	0.379400000000000	Gd 1	Least threatened	Grassland Biome	Drakensberg Grassland Bioregion	Poorly protected
Amathole Montane Grassland	3.009000000000000	Gd 1	Least threatened	Grassland Biome	Drakensberg Grassland Bioregion	Poorly protected
Amathole Montane Grassland	4.525400000000000	Gd 1	Least threatened	Grassland Biome	Drakensberg Grassland Bioregion	Poorly protected
Amathole Montane Grassland	0.104700000000000	Gd 1	Least threatened	Grassland Biome	Drakensberg Grassland Bioregion	Poorly protected
Amathole Montane Grassland	0.663300000000000	Gd 1	Least threatened	Grassland Biome	Drakensberg Grassland Bioregion	Poorly protected
Amathole Montane Grassland	0.175000000000000	Gd 1	Least threatened	Grassland Biome	Drakensberg Grassland Bioregion	Poorly protected
Amathole Montane Grassland	0.820900000000000	Gd 1	Least threatened	Grassland Biome	Drakensberg Grassland Bioregion	Poorly protected
Amathole Montane Grassland	0.125300000000000	Gd 1	Least threatened	Grassland Biome	Drakensberg Grassland Bioregion	Poorly protected
Amathole Montane Grassland	1.370600000000000	Gd 1	Least threatened	Grassland Biome	Drakensberg Grassland Bioregion	Poorly protected
Amathole Montane Grassland	0.099100000000000	Gd 1	Least threatened	Grassland Biome	Drakensberg Grassland Bioregion	Poorly protected
Amathole Montane Grassland	0.148100000000000	Gd 1	Least threatened	Grassland Biome	Drakensberg Grassland Bioregion	Poorly protected
Amathole Montane Grassland	0.075200000000000	Gd 1	Least threatened	Grassland Biome	Drakensberg Grassland Bioregion	Poorly protected
Amathole Montane Grassland	0.885400000000000	Gd 1	Least threatened	Grassland Biome	Drakensberg Grassland Bioregion	Poorly protected
Amathole Montane Grassland	0.095500000000000	Gd 1	Least threatened	Grassland Biome	Drakensberg Grassland Bioregion	Poorly protected
Amathole Montane Grassland	29.907599999999999	Gd 1	Least threatened	Grassland Biome	Drakensberg Grassland Bioregion	Poorly protected
Amathole Montane Grassland	8.827900000000000	Gd 1	Least threatened	Grassland Biome	Drakensberg Grassland Bioregion	Poorly protected
Amathole Montane Grassland	0.216700000000000	Gd 1	Least threatened	Grassland Biome	Drakensberg Grassland Bioregion	Poorly protected
Amathole Montane Grassland	0.495100000000000	Gd 1	Least threatened	Grassland Biome	Drakensberg Grassland Bioregion	Poorly protected
Amathole Montane Grassland	1.743200000000000	Gd 1	Least threatened	Grassland Biome	Drakensberg Grassland Bioregion	Poorly protected
Amathole Montane Grassland	2.561400000000000	Gd 1	Least threatened	Grassland Biome	Drakensberg Grassland Bioregion	Poorly protected
Amathole Montane Grassland	0.270800000000000	Gd 1	Least threatened	Grassland Biome	Drakensberg Grassland Bioregion	Poorly protected
Amathole Montane Grassland	0.214800000000000	Gd 1	Least threatened	Grassland Biome	Drakensberg Grassland Bioregion	Poorly protected
Amathole Montane Grassland	0.211300000000000	Gd 1	Least threatened	Grassland Biome	Drakensberg Grassland Bioregion	Poorly protected
Amathole Montane Grassland	0.133000000000000	Gd 1	Least threatened	Grassland Biome	Drakensberg Grassland Bioregion	Poorly protected
Amathole Montane Grassland	0.114300000000000	Gd 1	Least threatened	Grassland Biome	Drakensberg Grassland Bioregion	Poorly protected
Amathole Montane Grassland	0.123000000000000	Gd 1	Least threatened	Grassland Biome	Drakensberg Grassland Bioregion	Poorly protected
Amathole Montane Grassland	0.138200000000000	Gd 1	Least threatened	Grassland Biome	Drakensberg Grassland Bioregion	Poorly protected
Amathole Montane Grassland	0.097300000000000	Gd 1	Least threatened	Grassland Biome	Drakensberg Grassland Bioregion	Poorly protected
Amathole Montane Grassland	0.306600000000000	Gd 1	Least threatened	Grassland Biome	Drakensberg Grassland Bioregion	Poorly protected
Amathole Montane Grassland	0.221100000000000	Gd 1	Least threatened	Grassland Biome	Drakensberg Grassland Bioregion	Poorly protected
Amathole Montane Grassland	0.336600000000000	Gd 1	Least threatened	Grassland Biome	Drakensberg Grassland Bioregion	Poorly protected
Amathole Montane Grassland	4.348600000000000	Gd 1	Least threatened	Grassland Biome	Drakensberg Grassland Bioregion	Poorly protected
Amathole Montane Grassland	0.346200000000000	Gd 1	Least threatened	Grassland Biome	Drakensberg Grassland Bioregion	Poorly protected
Amersfoort Highveld Clay Grassland	3896.551699999999983	Gm 13	Vulnerable	Grassland Biome	Mesic Highveld Grassland Bioregion	Not protected
Andesite Mountain Bushveld	145.653199999999998	SVcb 11	Least threatened	Savanna Biome	Central Bushveld Bioregion	Poorly protected
Andesite Mountain Bushveld	89.114599999999996	SVcb 11	Least threatened	Savanna Biome	Central Bushveld Bioregion	Poorly protected
Andesite Mountain Bushveld	4.718300000000000	SVcb 11	Least threatened	Savanna Biome	Central Bushveld Bioregion	Poorly protected
Andesite Mountain Bushveld	10.943899999999999	SVcb 11	Least threatened	Savanna Biome	Central Bushveld Bioregion	Poorly protected
Andesite Mountain Bushveld	10.057600000000001	SVcb 11	Least threatened	Savanna Biome	Central Bushveld Bioregion	Poorly protected
Andesite Mountain Bushveld	82.666600000000003	SVcb 11	Least threatened	Savanna Biome	Central Bushveld Bioregion	Poorly protected
Andesite Mountain Bushveld	0.510600000000000	SVcb 11	Least threatened	Savanna Biome	Central Bushveld Bioregion	Poorly protected
Andesite Mountain Bushveld	1.291500000000000	SVcb 11	Least threatened	Savanna Biome	Central Bushveld Bioregion	Poorly protected
Andesite Mountain Bushveld	0.147000000000000	SVcb 11	Least threatened	Savanna Biome	Central Bushveld Bioregion	Poorly protected
Andesite Mountain Bushveld	0.094200000000000	SVcb 11	Least threatened	Savanna Biome	Central Bushveld Bioregion	Poorly protected
Andesite Mountain Bushveld	0.193500000000000	SVcb 11	Least threatened	Savanna Biome	Central Bushveld Bioregion	Poorly protected
Andesite Mountain Bushveld	0.317400000000000	SVcb 11	Least threatened	Savanna Biome	Central Bushveld Bioregion	Poorly protected
Andesite Mountain Bushveld	0.062100000000000	SVcb 11	Least threatened	Savanna Biome	Central Bushveld Bioregion	Poorly protected
Andesite Mountain Bushveld	1.322400000000000	SVcb 11	Least threatened	Savanna Biome	Central Bushveld Bioregion	Poorly protected
Andesite Mountain Bushveld	0.547600000000000	SVcb 11	Least threatened	Savanna Biome	Central Bushveld Bioregion	Poorly protected
Andesite Mountain Bushveld	8.709199999999999	SVcb 11	Least threatened	Savanna Biome	Central Bushveld Bioregion	Poorly protected
Andesite Mountain Bushveld	0.063100000000000	SVcb 11	Least threatened	Savanna Biome	Central Bushveld Bioregion	Poorly protected
Andesite Mountain Bushveld	1.111000000000000	SVcb 11	Least threatened	Savanna Biome	Central Bushveld Bioregion	Poorly protected
Andesite Mountain Bushveld	0.229800000000000	SVcb 11	Least threatened	Savanna Biome	Central Bushveld Bioregion	Poorly protected
Andesite Mountain Bushveld	0.109900000000000	SVcb 11	Least threatened	Savanna Biome	Central Bushveld Bioregion	Poorly protected
Andesite Mountain Bushveld	2.318600000000000	SVcb 11	Least threatened	Savanna Biome	Central Bushveld Bioregion	Poorly protected
Andesite Mountain Bushveld	0.289000000000000	SVcb 11	Least threatened	Savanna Biome	Central Bushveld Bioregion	Poorly protected
Andesite Mountain Bushveld	122.880099999999999	SVcb 11	Least threatened	Savanna Biome	Central Bushveld Bioregion	Poorly protected
Andesite Mountain Bushveld	15.527200000000001	SVcb 11	Least threatened	Savanna Biome	Central Bushveld Bioregion	Poorly protected
Andesite Mountain Bushveld	209.071400000000011	SVcb 11	Least threatened	Savanna Biome	Central Bushveld Bioregion	Poorly protected
Andesite Mountain Bushveld	118.889799999999994	SVcb 11	Least threatened	Savanna Biome	Central Bushveld Bioregion	Poorly protected
Andesite Mountain Bushveld	22.608699999999999	SVcb 11	Least threatened	Savanna Biome	Central Bushveld Bioregion	Poorly protected
Andesite Mountain Bushveld	140.388000000000005	SVcb 11	Least threatened	Savanna Biome	Central Bushveld Bioregion	Poorly protected
Andesite Mountain Bushveld	10.387600000000001	SVcb 11	Least threatened	Savanna Biome	Central Bushveld Bioregion	Poorly protected
Andesite Mountain Bushveld	145.670299999999997	SVcb 11	Least threatened	Savanna Biome	Central Bushveld Bioregion	Poorly protected
Andesite Mountain Bushveld	11.704700000000001	SVcb 11	Least threatened	Savanna Biome	Central Bushveld Bioregion	Poorly protected
Andesite Mountain Bushveld	7.193200000000000	SVcb 11	Least threatened	Savanna Biome	Central Bushveld Bioregion	Poorly protected
Andesite Mountain Bushveld	120.203299999999999	SVcb 11	Least threatened	Savanna Biome	Central Bushveld Bioregion	Poorly protected
Andesite Mountain Bushveld	8.038900000000000	SVcb 11	Least threatened	Savanna Biome	Central Bushveld Bioregion	Poorly protected
Andesite Mountain Bushveld	355.545399999999972	SVcb 11	Least threatened	Savanna Biome	Central Bushveld Bioregion	Poorly protected
Andesite Mountain Bushveld	68.769700000000000	SVcb 11	Least threatened	Savanna Biome	Central Bushveld Bioregion	Poorly protected
Andesite Mountain Bushveld	5.253300000000000	SVcb 11	Least threatened	Savanna Biome	Central Bushveld Bioregion	Poorly protected
Andesite Mountain Bushveld	188.853000000000009	SVcb 11	Least threatened	Savanna Biome	Central Bushveld Bioregion	Poorly protected
Andesite Mountain Bushveld	56.541800000000002	SVcb 11	Least threatened	Savanna Biome	Central Bushveld Bioregion	Poorly protected
Andesite Mountain Bushveld	9.245500000000000	SVcb 11	Least threatened	Savanna Biome	Central Bushveld Bioregion	Poorly protected
Andesite Mountain Bushveld	15.074800000000000	SVcb 11	Least threatened	Savanna Biome	Central Bushveld Bioregion	Poorly protected
Anenous Plateau Shrubland	234.281299999999987	SKr 15	Least threatened	Succulent Karoo Biome	Richtersveld Bioregion	Not protected
Arid Estuarine Salt Marshes	16.098400000000002	AZe 1	Least threatened	Azonal Vegetation	Estuarine Vegetation	Not protected
Arid Estuarine Salt Marshes	0.224300000000000	AZe 1	Least threatened	Azonal Vegetation	Estuarine Vegetation	Not protected
Arid Estuarine Salt Marshes	1.320100000000000	AZe 1	Least threatened	Azonal Vegetation	Estuarine Vegetation	Not protected
Arid Estuarine Salt Marshes	1.091200000000000	AZe 1	Least threatened	Azonal Vegetation	Estuarine Vegetation	Not protected
Arid Estuarine Salt Marshes	0.067800000000000	AZe 1	Least threatened	Azonal Vegetation	Estuarine Vegetation	Not protected
Arid Estuarine Salt Marshes	3.037800000000000	AZe 1	Least threatened	Azonal Vegetation	Estuarine Vegetation	Not protected
Arid Estuarine Salt Marshes	0.201700000000000	AZe 1	Least threatened	Azonal Vegetation	Estuarine Vegetation	Not protected
Arid Estuarine Salt Marshes	5.460200000000000	AZe 1	Least threatened	Azonal Vegetation	Estuarine Vegetation	Not protected
Arid Estuarine Salt Marshes	29.168199999999999	AZe 1	Least threatened	Azonal Vegetation	Estuarine Vegetation	Not protected
Atlantis Sand Fynbos	2.350100000000000	FFd 4	Vulnerable	Fynbos Biome	Southwest Fynbos Bioregion	Poorly protected
Atlantis Sand Fynbos	22.217199999999998	FFd 4	Vulnerable	Fynbos Biome	Southwest Fynbos Bioregion	Poorly protected
Atlantis Sand Fynbos	0.359500000000000	FFd 4	Vulnerable	Fynbos Biome	Southwest Fynbos Bioregion	Poorly protected
Atlantis Sand Fynbos	22.342600000000001	FFd 4	Vulnerable	Fynbos Biome	Southwest Fynbos Bioregion	Poorly protected
Atlantis Sand Fynbos	2.670200000000000	FFd 4	Vulnerable	Fynbos Biome	Southwest Fynbos Bioregion	Poorly protected
Atlantis Sand Fynbos	0.854400000000000	FFd 4	Vulnerable	Fynbos Biome	Southwest Fynbos Bioregion	Poorly protected
Atlantis Sand Fynbos	4.611700000000000	FFd 4	Vulnerable	Fynbos Biome	Southwest Fynbos Bioregion	Poorly protected
Atlantis Sand Fynbos	1.893300000000000	FFd 4	Vulnerable	Fynbos Biome	Southwest Fynbos Bioregion	Poorly protected
Atlantis Sand Fynbos	18.511600000000001	FFd 4	Vulnerable	Fynbos Biome	Southwest Fynbos Bioregion	Poorly protected
Atlantis Sand Fynbos	23.068600000000000	FFd 4	Vulnerable	Fynbos Biome	Southwest Fynbos Bioregion	Poorly protected
Atlantis Sand Fynbos	433.449799999999982	FFd 4	Vulnerable	Fynbos Biome	Southwest Fynbos Bioregion	Poorly protected
Atlantis Sand Fynbos	42.322200000000002	FFd 4	Vulnerable	Fynbos Biome	Southwest Fynbos Bioregion	Poorly protected
Atlantis Sand Fynbos	1.656700000000000	FFd 4	Vulnerable	Fynbos Biome	Southwest Fynbos Bioregion	Poorly protected
Atlantis Sand Fynbos	1.966100000000000	FFd 4	Vulnerable	Fynbos Biome	Southwest Fynbos Bioregion	Poorly protected
Atlantis Sand Fynbos	4.197200000000000	FFd 4	Vulnerable	Fynbos Biome	Southwest Fynbos Bioregion	Poorly protected
Atlantis Sand Fynbos	0.397000000000000	FFd 4	Vulnerable	Fynbos Biome	Southwest Fynbos Bioregion	Poorly protected
Atlantis Sand Fynbos	115.138099999999994	FFd 4	Vulnerable	Fynbos Biome	Southwest Fynbos Bioregion	Poorly protected
Auob Duneveld	27.045300000000001	SVkd 3	Least threatened	Savanna Biome	Kalahari Duneveld Bioregion	Well protected
Auob Duneveld	2345.034599999999955	SVkd 3	Least threatened	Savanna Biome	Kalahari Duneveld Bioregion	Well protected
Auob Duneveld	249.544399999999996	SVkd 3	Least threatened	Savanna Biome	Kalahari Duneveld Bioregion	Well protected
Auob Duneveld	159.276100000000014	SVkd 3	Least threatened	Savanna Biome	Kalahari Duneveld Bioregion	Well protected
Auob Duneveld	101.404300000000006	SVkd 3	Least threatened	Savanna Biome	Kalahari Duneveld Bioregion	Well protected
Barberton Montane Grassland	3.185100000000000	Gm 17	Vulnerable	Grassland Biome	Mesic Highveld Grassland Bioregion	Moderately protected
Barberton Montane Grassland	27.491199999999999	Gm 17	Vulnerable	Grassland Biome	Mesic Highveld Grassland Bioregion	Moderately protected
Barberton Montane Grassland	1.563600000000000	Gm 17	Vulnerable	Grassland Biome	Mesic Highveld Grassland Bioregion	Moderately protected
Barberton Montane Grassland	0.139700000000000	Gm 17	Vulnerable	Grassland Biome	Mesic Highveld Grassland Bioregion	Moderately protected
Barberton Montane Grassland	0.059700000000000	Gm 17	Vulnerable	Grassland Biome	Mesic Highveld Grassland Bioregion	Moderately protected
Barberton Montane Grassland	0.124900000000000	Gm 17	Vulnerable	Grassland Biome	Mesic Highveld Grassland Bioregion	Moderately protected
Barberton Montane Grassland	1284.435600000000022	Gm 17	Vulnerable	Grassland Biome	Mesic Highveld Grassland Bioregion	Moderately protected
Barberton Serpentine Sourveld	6.524300000000000	SVl 13	Vulnerable	Savanna Biome	Lowveld Bioregion	Poorly protected
Barberton Serpentine Sourveld	0.155900000000000	SVl 13	Vulnerable	Savanna Biome	Lowveld Bioregion	Poorly protected
Barberton Serpentine Sourveld	0.243200000000000	SVl 13	Vulnerable	Savanna Biome	Lowveld Bioregion	Poorly protected
Barberton Serpentine Sourveld	1.819400000000000	SVl 13	Vulnerable	Savanna Biome	Lowveld Bioregion	Poorly protected
Barberton Serpentine Sourveld	12.111499999999999	SVl 13	Vulnerable	Savanna Biome	Lowveld Bioregion	Poorly protected
Barberton Serpentine Sourveld	5.593300000000000	SVl 13	Vulnerable	Savanna Biome	Lowveld Bioregion	Poorly protected
Barberton Serpentine Sourveld	3.741300000000000	SVl 13	Vulnerable	Savanna Biome	Lowveld Bioregion	Poorly protected
Barberton Serpentine Sourveld	11.520400000000000	SVl 13	Vulnerable	Savanna Biome	Lowveld Bioregion	Poorly protected
Barberton Serpentine Sourveld	1.111300000000000	SVl 13	Vulnerable	Savanna Biome	Lowveld Bioregion	Poorly protected
Barberton Serpentine Sourveld	3.771000000000000	SVl 13	Vulnerable	Savanna Biome	Lowveld Bioregion	Poorly protected
Barberton Serpentine Sourveld	4.058600000000000	SVl 13	Vulnerable	Savanna Biome	Lowveld Bioregion	Poorly protected
Barberton Serpentine Sourveld	2.754300000000000	SVl 13	Vulnerable	Savanna Biome	Lowveld Bioregion	Poorly protected
Barberton Serpentine Sourveld	0.230600000000000	SVl 13	Vulnerable	Savanna Biome	Lowveld Bioregion	Poorly protected
Barberton Serpentine Sourveld	0.628700000000000	SVl 13	Vulnerable	Savanna Biome	Lowveld Bioregion	Poorly protected
Barberton Serpentine Sourveld	1.011600000000000	SVl 13	Vulnerable	Savanna Biome	Lowveld Bioregion	Poorly protected
Barberton Serpentine Sourveld	0.929900000000000	SVl 13	Vulnerable	Savanna Biome	Lowveld Bioregion	Poorly protected
Barberton Serpentine Sourveld	0.613800000000000	SVl 13	Vulnerable	Savanna Biome	Lowveld Bioregion	Poorly protected
Barberton Serpentine Sourveld	5.876100000000000	SVl 13	Vulnerable	Savanna Biome	Lowveld Bioregion	Poorly protected
Barberton Serpentine Sourveld	0.661500000000000	SVl 13	Vulnerable	Savanna Biome	Lowveld Bioregion	Poorly protected
Barberton Serpentine Sourveld	0.369100000000000	SVl 13	Vulnerable	Savanna Biome	Lowveld Bioregion	Poorly protected
Barberton Serpentine Sourveld	4.874200000000000	SVl 13	Vulnerable	Savanna Biome	Lowveld Bioregion	Poorly protected
Barberton Serpentine Sourveld	0.197100000000000	SVl 13	Vulnerable	Savanna Biome	Lowveld Bioregion	Poorly protected
Barberton Serpentine Sourveld	2.048200000000000	SVl 13	Vulnerable	Savanna Biome	Lowveld Bioregion	Poorly protected
Barberton Serpentine Sourveld	6.306900000000000	SVl 13	Vulnerable	Savanna Biome	Lowveld Bioregion	Poorly protected
Barberton Serpentine Sourveld	0.228600000000000	SVl 13	Vulnerable	Savanna Biome	Lowveld Bioregion	Poorly protected
Barberton Serpentine Sourveld	7.275300000000000	SVl 13	Vulnerable	Savanna Biome	Lowveld Bioregion	Poorly protected
Barberton Serpentine Sourveld	0.113000000000000	SVl 13	Vulnerable	Savanna Biome	Lowveld Bioregion	Poorly protected
Barberton Serpentine Sourveld	0.081900000000000	SVl 13	Vulnerable	Savanna Biome	Lowveld Bioregion	Poorly protected
Barberton Serpentine Sourveld	2.623100000000000	SVl 13	Vulnerable	Savanna Biome	Lowveld Bioregion	Poorly protected
Barberton Serpentine Sourveld	0.392400000000000	SVl 13	Vulnerable	Savanna Biome	Lowveld Bioregion	Poorly protected
Barberton Serpentine Sourveld	1.173800000000000	SVl 13	Vulnerable	Savanna Biome	Lowveld Bioregion	Poorly protected
Barberton Serpentine Sourveld	15.642300000000001	SVl 13	Vulnerable	Savanna Biome	Lowveld Bioregion	Poorly protected
Barberton Serpentine Sourveld	1.389800000000000	SVl 13	Vulnerable	Savanna Biome	Lowveld Bioregion	Poorly protected
Barberton Serpentine Sourveld	0.477100000000000	SVl 13	Vulnerable	Savanna Biome	Lowveld Bioregion	Poorly protected
Barberton Serpentine Sourveld	1.782500000000000	SVl 13	Vulnerable	Savanna Biome	Lowveld Bioregion	Poorly protected
Barberton Serpentine Sourveld	1.289200000000000	SVl 13	Vulnerable	Savanna Biome	Lowveld Bioregion	Poorly protected
Basotho Montane Shrubland	5.970900000000000	Gm 5	Vulnerable	Grassland Biome	Mesic Highveld Grassland Bioregion	Poorly protected
Basotho Montane Shrubland	5.047600000000000	Gm 5	Vulnerable	Grassland Biome	Mesic Highveld Grassland Bioregion	Poorly protected
Basotho Montane Shrubland	14.633800000000001	Gm 5	Vulnerable	Grassland Biome	Mesic Highveld Grassland Bioregion	Poorly protected
Basotho Montane Shrubland	0.765500000000000	Gm 5	Vulnerable	Grassland Biome	Mesic Highveld Grassland Bioregion	Poorly protected
Basotho Montane Shrubland	65.248400000000004	Gm 5	Vulnerable	Grassland Biome	Mesic Highveld Grassland Bioregion	Poorly protected
Basotho Montane Shrubland	17.593599999999999	Gm 5	Vulnerable	Grassland Biome	Mesic Highveld Grassland Bioregion	Poorly protected
Basotho Montane Shrubland	5.999700000000000	Gm 5	Vulnerable	Grassland Biome	Mesic Highveld Grassland Bioregion	Poorly protected
Basotho Montane Shrubland	0.388800000000000	Gm 5	Vulnerable	Grassland Biome	Mesic Highveld Grassland Bioregion	Poorly protected
Basotho Montane Shrubland	48.276299999999999	Gm 5	Vulnerable	Grassland Biome	Mesic Highveld Grassland Bioregion	Poorly protected
Basotho Montane Shrubland	19.099100000000000	Gm 5	Vulnerable	Grassland Biome	Mesic Highveld Grassland Bioregion	Poorly protected
Basotho Montane Shrubland	3.848200000000000	Gm 5	Vulnerable	Grassland Biome	Mesic Highveld Grassland Bioregion	Poorly protected
Basotho Montane Shrubland	3.835700000000000	Gm 5	Vulnerable	Grassland Biome	Mesic Highveld Grassland Bioregion	Poorly protected
Basotho Montane Shrubland	0.448000000000000	Gm 5	Vulnerable	Grassland Biome	Mesic Highveld Grassland Bioregion	Poorly protected
Basotho Montane Shrubland	3.060400000000000	Gm 5	Vulnerable	Grassland Biome	Mesic Highveld Grassland Bioregion	Poorly protected
Basotho Montane Shrubland	2.861000000000000	Gm 5	Vulnerable	Grassland Biome	Mesic Highveld Grassland Bioregion	Poorly protected
Basotho Montane Shrubland	2.085900000000000	Gm 5	Vulnerable	Grassland Biome	Mesic Highveld Grassland Bioregion	Poorly protected
Basotho Montane Shrubland	7.000300000000000	Gm 5	Vulnerable	Grassland Biome	Mesic Highveld Grassland Bioregion	Poorly protected
Basotho Montane Shrubland	3.408500000000000	Gm 5	Vulnerable	Grassland Biome	Mesic Highveld Grassland Bioregion	Poorly protected
Basotho Montane Shrubland	3.981200000000000	Gm 5	Vulnerable	Grassland Biome	Mesic Highveld Grassland Bioregion	Poorly protected
Basotho Montane Shrubland	2.290500000000000	Gm 5	Vulnerable	Grassland Biome	Mesic Highveld Grassland Bioregion	Poorly protected
Basotho Montane Shrubland	3.205800000000000	Gm 5	Vulnerable	Grassland Biome	Mesic Highveld Grassland Bioregion	Poorly protected
Basotho Montane Shrubland	4.123600000000000	Gm 5	Vulnerable	Grassland Biome	Mesic Highveld Grassland Bioregion	Poorly protected
Basotho Montane Shrubland	1.236600000000000	Gm 5	Vulnerable	Grassland Biome	Mesic Highveld Grassland Bioregion	Poorly protected
Basotho Montane Shrubland	83.296000000000006	Gm 5	Vulnerable	Grassland Biome	Mesic Highveld Grassland Bioregion	Poorly protected
Basotho Montane Shrubland	5.831600000000000	Gm 5	Vulnerable	Grassland Biome	Mesic Highveld Grassland Bioregion	Poorly protected
Basotho Montane Shrubland	1.014500000000000	Gm 5	Vulnerable	Grassland Biome	Mesic Highveld Grassland Bioregion	Poorly protected
Basotho Montane Shrubland	7.807600000000000	Gm 5	Vulnerable	Grassland Biome	Mesic Highveld Grassland Bioregion	Poorly protected
Basotho Montane Shrubland	5.822400000000000	Gm 5	Vulnerable	Grassland Biome	Mesic Highveld Grassland Bioregion	Poorly protected
Basotho Montane Shrubland	17.952100000000002	Gm 5	Vulnerable	Grassland Biome	Mesic Highveld Grassland Bioregion	Poorly protected
Basotho Montane Shrubland	7.283900000000000	Gm 5	Vulnerable	Grassland Biome	Mesic Highveld Grassland Bioregion	Poorly protected
Basotho Montane Shrubland	7.164100000000000	Gm 5	Vulnerable	Grassland Biome	Mesic Highveld Grassland Bioregion	Poorly protected
Basotho Montane Shrubland	3.239900000000000	Gm 5	Vulnerable	Grassland Biome	Mesic Highveld Grassland Bioregion	Poorly protected
Basotho Montane Shrubland	4.220800000000000	Gm 5	Vulnerable	Grassland Biome	Mesic Highveld Grassland Bioregion	Poorly protected
Basotho Montane Shrubland	4.798100000000000	Gm 5	Vulnerable	Grassland Biome	Mesic Highveld Grassland Bioregion	Poorly protected
Basotho Montane Shrubland	2.884700000000000	Gm 5	Vulnerable	Grassland Biome	Mesic Highveld Grassland Bioregion	Poorly protected
Basotho Montane Shrubland	2.106300000000000	Gm 5	Vulnerable	Grassland Biome	Mesic Highveld Grassland Bioregion	Poorly protected
Basotho Montane Shrubland	9.284300000000000	Gm 5	Vulnerable	Grassland Biome	Mesic Highveld Grassland Bioregion	Poorly protected
Basotho Montane Shrubland	6.854100000000000	Gm 5	Vulnerable	Grassland Biome	Mesic Highveld Grassland Bioregion	Poorly protected
Basotho Montane Shrubland	3.507000000000000	Gm 5	Vulnerable	Grassland Biome	Mesic Highveld Grassland Bioregion	Poorly protected
Basotho Montane Shrubland	1.927700000000000	Gm 5	Vulnerable	Grassland Biome	Mesic Highveld Grassland Bioregion	Poorly protected
Basotho Montane Shrubland	50.346600000000002	Gm 5	Vulnerable	Grassland Biome	Mesic Highveld Grassland Bioregion	Poorly protected
Basotho Montane Shrubland	66.536299999999997	Gm 5	Vulnerable	Grassland Biome	Mesic Highveld Grassland Bioregion	Poorly protected
Basotho Montane Shrubland	2.400700000000000	Gm 5	Vulnerable	Grassland Biome	Mesic Highveld Grassland Bioregion	Poorly protected
Basotho Montane Shrubland	1.547500000000000	Gm 5	Vulnerable	Grassland Biome	Mesic Highveld Grassland Bioregion	Poorly protected
Basotho Montane Shrubland	3.908100000000000	Gm 5	Vulnerable	Grassland Biome	Mesic Highveld Grassland Bioregion	Poorly protected
Basotho Montane Shrubland	2.376100000000000	Gm 5	Vulnerable	Grassland Biome	Mesic Highveld Grassland Bioregion	Poorly protected
Basotho Montane Shrubland	7.171400000000000	Gm 5	Vulnerable	Grassland Biome	Mesic Highveld Grassland Bioregion	Poorly protected
Basotho Montane Shrubland	6.478300000000000	Gm 5	Vulnerable	Grassland Biome	Mesic Highveld Grassland Bioregion	Poorly protected
Basotho Montane Shrubland	1.323500000000000	Gm 5	Vulnerable	Grassland Biome	Mesic Highveld Grassland Bioregion	Poorly protected
Basotho Montane Shrubland	2.945100000000000	Gm 5	Vulnerable	Grassland Biome	Mesic Highveld Grassland Bioregion	Poorly protected
Basotho Montane Shrubland	4.594300000000000	Gm 5	Vulnerable	Grassland Biome	Mesic Highveld Grassland Bioregion	Poorly protected
Basotho Montane Shrubland	14.170600000000000	Gm 5	Vulnerable	Grassland Biome	Mesic Highveld Grassland Bioregion	Poorly protected
Basotho Montane Shrubland	4.298300000000000	Gm 5	Vulnerable	Grassland Biome	Mesic Highveld Grassland Bioregion	Poorly protected
Basotho Montane Shrubland	3.059700000000000	Gm 5	Vulnerable	Grassland Biome	Mesic Highveld Grassland Bioregion	Poorly protected
Basotho Montane Shrubland	2.407700000000000	Gm 5	Vulnerable	Grassland Biome	Mesic Highveld Grassland Bioregion	Poorly protected
Basotho Montane Shrubland	3.180200000000000	Gm 5	Vulnerable	Grassland Biome	Mesic Highveld Grassland Bioregion	Poorly protected
Basotho Montane Shrubland	2.708300000000000	Gm 5	Vulnerable	Grassland Biome	Mesic Highveld Grassland Bioregion	Poorly protected
Basotho Montane Shrubland	2.815200000000000	Gm 5	Vulnerable	Grassland Biome	Mesic Highveld Grassland Bioregion	Poorly protected
Basotho Montane Shrubland	1.871000000000000	Gm 5	Vulnerable	Grassland Biome	Mesic Highveld Grassland Bioregion	Poorly protected
Basotho Montane Shrubland	1.489100000000000	Gm 5	Vulnerable	Grassland Biome	Mesic Highveld Grassland Bioregion	Poorly protected
Basotho Montane Shrubland	0.934100000000000	Gm 5	Vulnerable	Grassland Biome	Mesic Highveld Grassland Bioregion	Poorly protected
Basotho Montane Shrubland	4.510800000000000	Gm 5	Vulnerable	Grassland Biome	Mesic Highveld Grassland Bioregion	Poorly protected
Basotho Montane Shrubland	7.708500000000000	Gm 5	Vulnerable	Grassland Biome	Mesic Highveld Grassland Bioregion	Poorly protected
Basotho Montane Shrubland	23.068800000000000	Gm 5	Vulnerable	Grassland Biome	Mesic Highveld Grassland Bioregion	Poorly protected
Basotho Montane Shrubland	3.526400000000000	Gm 5	Vulnerable	Grassland Biome	Mesic Highveld Grassland Bioregion	Poorly protected
Basotho Montane Shrubland	10.731900000000000	Gm 5	Vulnerable	Grassland Biome	Mesic Highveld Grassland Bioregion	Poorly protected
Basotho Montane Shrubland	7.536100000000000	Gm 5	Vulnerable	Grassland Biome	Mesic Highveld Grassland Bioregion	Poorly protected
Basotho Montane Shrubland	9.217700000000001	Gm 5	Vulnerable	Grassland Biome	Mesic Highveld Grassland Bioregion	Poorly protected
Basotho Montane Shrubland	3.096800000000000	Gm 5	Vulnerable	Grassland Biome	Mesic Highveld Grassland Bioregion	Poorly protected
Basotho Montane Shrubland	65.791399999999996	Gm 5	Vulnerable	Grassland Biome	Mesic Highveld Grassland Bioregion	Poorly protected
Basotho Montane Shrubland	10.774800000000001	Gm 5	Vulnerable	Grassland Biome	Mesic Highveld Grassland Bioregion	Poorly protected
Basotho Montane Shrubland	15.442500000000001	Gm 5	Vulnerable	Grassland Biome	Mesic Highveld Grassland Bioregion	Poorly protected
Basotho Montane Shrubland	2.464800000000000	Gm 5	Vulnerable	Grassland Biome	Mesic Highveld Grassland Bioregion	Poorly protected
Basotho Montane Shrubland	14.361800000000001	Gm 5	Vulnerable	Grassland Biome	Mesic Highveld Grassland Bioregion	Poorly protected
Basotho Montane Shrubland	3.027800000000000	Gm 5	Vulnerable	Grassland Biome	Mesic Highveld Grassland Bioregion	Poorly protected
Basotho Montane Shrubland	3.423700000000000	Gm 5	Vulnerable	Grassland Biome	Mesic Highveld Grassland Bioregion	Poorly protected
Basotho Montane Shrubland	2.252600000000000	Gm 5	Vulnerable	Grassland Biome	Mesic Highveld Grassland Bioregion	Poorly protected
Basotho Montane Shrubland	5.597400000000000	Gm 5	Vulnerable	Grassland Biome	Mesic Highveld Grassland Bioregion	Poorly protected
Basotho Montane Shrubland	1.667300000000000	Gm 5	Vulnerable	Grassland Biome	Mesic Highveld Grassland Bioregion	Poorly protected
Basotho Montane Shrubland	0.166200000000000	Gm 5	Vulnerable	Grassland Biome	Mesic Highveld Grassland Bioregion	Poorly protected
Basotho Montane Shrubland	0.299500000000000	Gm 5	Vulnerable	Grassland Biome	Mesic Highveld Grassland Bioregion	Poorly protected
Basotho Montane Shrubland	3.837400000000000	Gm 5	Vulnerable	Grassland Biome	Mesic Highveld Grassland Bioregion	Poorly protected
Basotho Montane Shrubland	0.072100000000000	Gm 5	Vulnerable	Grassland Biome	Mesic Highveld Grassland Bioregion	Poorly protected
Basotho Montane Shrubland	14.756800000000000	Gm 5	Vulnerable	Grassland Biome	Mesic Highveld Grassland Bioregion	Poorly protected
Basotho Montane Shrubland	3.108600000000000	Gm 5	Vulnerable	Grassland Biome	Mesic Highveld Grassland Bioregion	Poorly protected
Basotho Montane Shrubland	6.410300000000000	Gm 5	Vulnerable	Grassland Biome	Mesic Highveld Grassland Bioregion	Poorly protected
Basotho Montane Shrubland	4.089500000000000	Gm 5	Vulnerable	Grassland Biome	Mesic Highveld Grassland Bioregion	Poorly protected
Basotho Montane Shrubland	11.308199999999999	Gm 5	Vulnerable	Grassland Biome	Mesic Highveld Grassland Bioregion	Poorly protected
Basotho Montane Shrubland	2.348400000000000	Gm 5	Vulnerable	Grassland Biome	Mesic Highveld Grassland Bioregion	Poorly protected
Basotho Montane Shrubland	2.438700000000000	Gm 5	Vulnerable	Grassland Biome	Mesic Highveld Grassland Bioregion	Poorly protected
Basotho Montane Shrubland	46.984900000000003	Gm 5	Vulnerable	Grassland Biome	Mesic Highveld Grassland Bioregion	Poorly protected
Basotho Montane Shrubland	3.647500000000000	Gm 5	Vulnerable	Grassland Biome	Mesic Highveld Grassland Bioregion	Poorly protected
Basotho Montane Shrubland	10.165500000000000	Gm 5	Vulnerable	Grassland Biome	Mesic Highveld Grassland Bioregion	Poorly protected
Basotho Montane Shrubland	3.692100000000000	Gm 5	Vulnerable	Grassland Biome	Mesic Highveld Grassland Bioregion	Poorly protected
Basotho Montane Shrubland	9.498500000000000	Gm 5	Vulnerable	Grassland Biome	Mesic Highveld Grassland Bioregion	Poorly protected
Basotho Montane Shrubland	7.902700000000000	Gm 5	Vulnerable	Grassland Biome	Mesic Highveld Grassland Bioregion	Poorly protected
Basotho Montane Shrubland	5.766800000000000	Gm 5	Vulnerable	Grassland Biome	Mesic Highveld Grassland Bioregion	Poorly protected
Basotho Montane Shrubland	0.635200000000000	Gm 5	Vulnerable	Grassland Biome	Mesic Highveld Grassland Bioregion	Poorly protected
Basotho Montane Shrubland	8.568899999999999	Gm 5	Vulnerable	Grassland Biome	Mesic Highveld Grassland Bioregion	Poorly protected
Basotho Montane Shrubland	4.838600000000000	Gm 5	Vulnerable	Grassland Biome	Mesic Highveld Grassland Bioregion	Poorly protected
Basotho Montane Shrubland	1.425100000000000	Gm 5	Vulnerable	Grassland Biome	Mesic Highveld Grassland Bioregion	Poorly protected
Basotho Montane Shrubland	3.724300000000000	Gm 5	Vulnerable	Grassland Biome	Mesic Highveld Grassland Bioregion	Poorly protected
Basotho Montane Shrubland	3.730500000000000	Gm 5	Vulnerable	Grassland Biome	Mesic Highveld Grassland Bioregion	Poorly protected
Basotho Montane Shrubland	33.635800000000003	Gm 5	Vulnerable	Grassland Biome	Mesic Highveld Grassland Bioregion	Poorly protected
Basotho Montane Shrubland	2.613100000000000	Gm 5	Vulnerable	Grassland Biome	Mesic Highveld Grassland Bioregion	Poorly protected
Basotho Montane Shrubland	12.937700000000000	Gm 5	Vulnerable	Grassland Biome	Mesic Highveld Grassland Bioregion	Poorly protected
Basotho Montane Shrubland	7.702300000000000	Gm 5	Vulnerable	Grassland Biome	Mesic Highveld Grassland Bioregion	Poorly protected
Basotho Montane Shrubland	6.004700000000000	Gm 5	Vulnerable	Grassland Biome	Mesic Highveld Grassland Bioregion	Poorly protected
Basotho Montane Shrubland	6.262300000000000	Gm 5	Vulnerable	Grassland Biome	Mesic Highveld Grassland Bioregion	Poorly protected
Basotho Montane Shrubland	6.750600000000000	Gm 5	Vulnerable	Grassland Biome	Mesic Highveld Grassland Bioregion	Poorly protected
Basotho Montane Shrubland	16.839900000000000	Gm 5	Vulnerable	Grassland Biome	Mesic Highveld Grassland Bioregion	Poorly protected
Basotho Montane Shrubland	2.665800000000000	Gm 5	Vulnerable	Grassland Biome	Mesic Highveld Grassland Bioregion	Poorly protected
Basotho Montane Shrubland	6.243400000000000	Gm 5	Vulnerable	Grassland Biome	Mesic Highveld Grassland Bioregion	Poorly protected
Basotho Montane Shrubland	155.824800000000010	Gm 5	Vulnerable	Grassland Biome	Mesic Highveld Grassland Bioregion	Poorly protected
Basotho Montane Shrubland	2.391600000000000	Gm 5	Vulnerable	Grassland Biome	Mesic Highveld Grassland Bioregion	Poorly protected
Basotho Montane Shrubland	3.241400000000000	Gm 5	Vulnerable	Grassland Biome	Mesic Highveld Grassland Bioregion	Poorly protected
Basotho Montane Shrubland	4.876300000000000	Gm 5	Vulnerable	Grassland Biome	Mesic Highveld Grassland Bioregion	Poorly protected
Basotho Montane Shrubland	1.870300000000000	Gm 5	Vulnerable	Grassland Biome	Mesic Highveld Grassland Bioregion	Poorly protected
Basotho Montane Shrubland	0.831400000000000	Gm 5	Vulnerable	Grassland Biome	Mesic Highveld Grassland Bioregion	Poorly protected
Basotho Montane Shrubland	7.185000000000000	Gm 5	Vulnerable	Grassland Biome	Mesic Highveld Grassland Bioregion	Poorly protected
Basotho Montane Shrubland	2.014300000000000	Gm 5	Vulnerable	Grassland Biome	Mesic Highveld Grassland Bioregion	Poorly protected
Basotho Montane Shrubland	1.478400000000000	Gm 5	Vulnerable	Grassland Biome	Mesic Highveld Grassland Bioregion	Poorly protected
Basotho Montane Shrubland	5.889700000000000	Gm 5	Vulnerable	Grassland Biome	Mesic Highveld Grassland Bioregion	Poorly protected
Basotho Montane Shrubland	3.897300000000000	Gm 5	Vulnerable	Grassland Biome	Mesic Highveld Grassland Bioregion	Poorly protected
Basotho Montane Shrubland	2.714100000000000	Gm 5	Vulnerable	Grassland Biome	Mesic Highveld Grassland Bioregion	Poorly protected
Basotho Montane Shrubland	4.988000000000000	Gm 5	Vulnerable	Grassland Biome	Mesic Highveld Grassland Bioregion	Poorly protected
Basotho Montane Shrubland	6.027200000000000	Gm 5	Vulnerable	Grassland Biome	Mesic Highveld Grassland Bioregion	Poorly protected
Basotho Montane Shrubland	2.193400000000000	Gm 5	Vulnerable	Grassland Biome	Mesic Highveld Grassland Bioregion	Poorly protected
Basotho Montane Shrubland	1.611500000000000	Gm 5	Vulnerable	Grassland Biome	Mesic Highveld Grassland Bioregion	Poorly protected
Basotho Montane Shrubland	2.963900000000000	Gm 5	Vulnerable	Grassland Biome	Mesic Highveld Grassland Bioregion	Poorly protected
Basotho Montane Shrubland	20.318500000000000	Gm 5	Vulnerable	Grassland Biome	Mesic Highveld Grassland Bioregion	Poorly protected
Basotho Montane Shrubland	12.295900000000000	Gm 5	Vulnerable	Grassland Biome	Mesic Highveld Grassland Bioregion	Poorly protected
Basotho Montane Shrubland	19.068200000000001	Gm 5	Vulnerable	Grassland Biome	Mesic Highveld Grassland Bioregion	Poorly protected
Basotho Montane Shrubland	3.248900000000000	Gm 5	Vulnerable	Grassland Biome	Mesic Highveld Grassland Bioregion	Poorly protected
Basotho Montane Shrubland	131.135300000000001	Gm 5	Vulnerable	Grassland Biome	Mesic Highveld Grassland Bioregion	Poorly protected
Basotho Montane Shrubland	4.924100000000000	Gm 5	Vulnerable	Grassland Biome	Mesic Highveld Grassland Bioregion	Poorly protected
Basotho Montane Shrubland	3.953200000000000	Gm 5	Vulnerable	Grassland Biome	Mesic Highveld Grassland Bioregion	Poorly protected
Basotho Montane Shrubland	7.589400000000000	Gm 5	Vulnerable	Grassland Biome	Mesic Highveld Grassland Bioregion	Poorly protected
Basotho Montane Shrubland	14.340600000000000	Gm 5	Vulnerable	Grassland Biome	Mesic Highveld Grassland Bioregion	Poorly protected
Basotho Montane Shrubland	4.256000000000000	Gm 5	Vulnerable	Grassland Biome	Mesic Highveld Grassland Bioregion	Poorly protected
Basotho Montane Shrubland	2.767400000000000	Gm 5	Vulnerable	Grassland Biome	Mesic Highveld Grassland Bioregion	Poorly protected
Basotho Montane Shrubland	5.490900000000000	Gm 5	Vulnerable	Grassland Biome	Mesic Highveld Grassland Bioregion	Poorly protected
Basotho Montane Shrubland	17.804300000000001	Gm 5	Vulnerable	Grassland Biome	Mesic Highveld Grassland Bioregion	Poorly protected
Basotho Montane Shrubland	4.523600000000000	Gm 5	Vulnerable	Grassland Biome	Mesic Highveld Grassland Bioregion	Poorly protected
Basotho Montane Shrubland	11.133100000000001	Gm 5	Vulnerable	Grassland Biome	Mesic Highveld Grassland Bioregion	Poorly protected
Basotho Montane Shrubland	2.434000000000000	Gm 5	Vulnerable	Grassland Biome	Mesic Highveld Grassland Bioregion	Poorly protected
Basotho Montane Shrubland	6.000500000000000	Gm 5	Vulnerable	Grassland Biome	Mesic Highveld Grassland Bioregion	Poorly protected
Basotho Montane Shrubland	1.312600000000000	Gm 5	Vulnerable	Grassland Biome	Mesic Highveld Grassland Bioregion	Poorly protected
Basotho Montane Shrubland	2.140100000000000	Gm 5	Vulnerable	Grassland Biome	Mesic Highveld Grassland Bioregion	Poorly protected
Basotho Montane Shrubland	3.253000000000000	Gm 5	Vulnerable	Grassland Biome	Mesic Highveld Grassland Bioregion	Poorly protected
Basotho Montane Shrubland	0.385000000000000	Gm 5	Vulnerable	Grassland Biome	Mesic Highveld Grassland Bioregion	Poorly protected
Basotho Montane Shrubland	2.193500000000000	Gm 5	Vulnerable	Grassland Biome	Mesic Highveld Grassland Bioregion	Poorly protected
Basotho Montane Shrubland	52.537300000000002	Gm 5	Vulnerable	Grassland Biome	Mesic Highveld Grassland Bioregion	Poorly protected
Basotho Montane Shrubland	24.983100000000000	Gm 5	Vulnerable	Grassland Biome	Mesic Highveld Grassland Bioregion	Poorly protected
Basotho Montane Shrubland	0.721900000000000	Gm 5	Vulnerable	Grassland Biome	Mesic Highveld Grassland Bioregion	Poorly protected
Basotho Montane Shrubland	92.452699999999993	Gm 5	Vulnerable	Grassland Biome	Mesic Highveld Grassland Bioregion	Poorly protected
Basotho Montane Shrubland	1.553600000000000	Gm 5	Vulnerable	Grassland Biome	Mesic Highveld Grassland Bioregion	Poorly protected
Basotho Montane Shrubland	1.993700000000000	Gm 5	Vulnerable	Grassland Biome	Mesic Highveld Grassland Bioregion	Poorly protected
Basotho Montane Shrubland	2.389300000000000	Gm 5	Vulnerable	Grassland Biome	Mesic Highveld Grassland Bioregion	Poorly protected
Basotho Montane Shrubland	2.425400000000000	Gm 5	Vulnerable	Grassland Biome	Mesic Highveld Grassland Bioregion	Poorly protected
Basotho Montane Shrubland	4.715900000000000	Gm 5	Vulnerable	Grassland Biome	Mesic Highveld Grassland Bioregion	Poorly protected
Basotho Montane Shrubland	0.478400000000000	Gm 5	Vulnerable	Grassland Biome	Mesic Highveld Grassland Bioregion	Poorly protected
Basotho Montane Shrubland	1.659900000000000	Gm 5	Vulnerable	Grassland Biome	Mesic Highveld Grassland Bioregion	Poorly protected
Basotho Montane Shrubland	2.448900000000000	Gm 5	Vulnerable	Grassland Biome	Mesic Highveld Grassland Bioregion	Poorly protected
Basotho Montane Shrubland	2.749200000000000	Gm 5	Vulnerable	Grassland Biome	Mesic Highveld Grassland Bioregion	Poorly protected
Basotho Montane Shrubland	4.242900000000000	Gm 5	Vulnerable	Grassland Biome	Mesic Highveld Grassland Bioregion	Poorly protected
Basotho Montane Shrubland	12.330399999999999	Gm 5	Vulnerable	Grassland Biome	Mesic Highveld Grassland Bioregion	Poorly protected
Basotho Montane Shrubland	6.696800000000000	Gm 5	Vulnerable	Grassland Biome	Mesic Highveld Grassland Bioregion	Poorly protected
Basotho Montane Shrubland	7.137700000000000	Gm 5	Vulnerable	Grassland Biome	Mesic Highveld Grassland Bioregion	Poorly protected
Basotho Montane Shrubland	3.000700000000000	Gm 5	Vulnerable	Grassland Biome	Mesic Highveld Grassland Bioregion	Poorly protected
Basotho Montane Shrubland	4.414500000000000	Gm 5	Vulnerable	Grassland Biome	Mesic Highveld Grassland Bioregion	Poorly protected
Basotho Montane Shrubland	2.737900000000000	Gm 5	Vulnerable	Grassland Biome	Mesic Highveld Grassland Bioregion	Poorly protected
Basotho Montane Shrubland	1.141200000000000	Gm 5	Vulnerable	Grassland Biome	Mesic Highveld Grassland Bioregion	Poorly protected
Basotho Montane Shrubland	3.848300000000000	Gm 5	Vulnerable	Grassland Biome	Mesic Highveld Grassland Bioregion	Poorly protected
Basotho Montane Shrubland	0.770200000000000	Gm 5	Vulnerable	Grassland Biome	Mesic Highveld Grassland Bioregion	Poorly protected
Basotho Montane Shrubland	13.753500000000001	Gm 5	Vulnerable	Grassland Biome	Mesic Highveld Grassland Bioregion	Poorly protected
Basotho Montane Shrubland	2.681000000000000	Gm 5	Vulnerable	Grassland Biome	Mesic Highveld Grassland Bioregion	Poorly protected
Basotho Montane Shrubland	6.051200000000000	Gm 5	Vulnerable	Grassland Biome	Mesic Highveld Grassland Bioregion	Poorly protected
Basotho Montane Shrubland	4.649000000000000	Gm 5	Vulnerable	Grassland Biome	Mesic Highveld Grassland Bioregion	Poorly protected
Basotho Montane Shrubland	3.493100000000000	Gm 5	Vulnerable	Grassland Biome	Mesic Highveld Grassland Bioregion	Poorly protected
Basotho Montane Shrubland	35.476100000000002	Gm 5	Vulnerable	Grassland Biome	Mesic Highveld Grassland Bioregion	Poorly protected
Basotho Montane Shrubland	3.279500000000000	Gm 5	Vulnerable	Grassland Biome	Mesic Highveld Grassland Bioregion	Poorly protected
Basotho Montane Shrubland	4.744400000000000	Gm 5	Vulnerable	Grassland Biome	Mesic Highveld Grassland Bioregion	Poorly protected
Basotho Montane Shrubland	2.836000000000000	Gm 5	Vulnerable	Grassland Biome	Mesic Highveld Grassland Bioregion	Poorly protected
Basotho Montane Shrubland	0.952300000000000	Gm 5	Vulnerable	Grassland Biome	Mesic Highveld Grassland Bioregion	Poorly protected
Basotho Montane Shrubland	0.945400000000000	Gm 5	Vulnerable	Grassland Biome	Mesic Highveld Grassland Bioregion	Poorly protected
Basotho Montane Shrubland	6.703500000000000	Gm 5	Vulnerable	Grassland Biome	Mesic Highveld Grassland Bioregion	Poorly protected
Basotho Montane Shrubland	9.057600000000001	Gm 5	Vulnerable	Grassland Biome	Mesic Highveld Grassland Bioregion	Poorly protected
Basotho Montane Shrubland	2.717200000000000	Gm 5	Vulnerable	Grassland Biome	Mesic Highveld Grassland Bioregion	Poorly protected
Basotho Montane Shrubland	15.464499999999999	Gm 5	Vulnerable	Grassland Biome	Mesic Highveld Grassland Bioregion	Poorly protected
Basotho Montane Shrubland	12.259300000000000	Gm 5	Vulnerable	Grassland Biome	Mesic Highveld Grassland Bioregion	Poorly protected
Basotho Montane Shrubland	2.504400000000000	Gm 5	Vulnerable	Grassland Biome	Mesic Highveld Grassland Bioregion	Poorly protected
Basotho Montane Shrubland	3.637000000000000	Gm 5	Vulnerable	Grassland Biome	Mesic Highveld Grassland Bioregion	Poorly protected
Basotho Montane Shrubland	6.144900000000000	Gm 5	Vulnerable	Grassland Biome	Mesic Highveld Grassland Bioregion	Poorly protected
Basotho Montane Shrubland	25.059500000000000	Gm 5	Vulnerable	Grassland Biome	Mesic Highveld Grassland Bioregion	Poorly protected
Basotho Montane Shrubland	3.243800000000000	Gm 5	Vulnerable	Grassland Biome	Mesic Highveld Grassland Bioregion	Poorly protected
Basotho Montane Shrubland	11.102399999999999	Gm 5	Vulnerable	Grassland Biome	Mesic Highveld Grassland Bioregion	Poorly protected
Basotho Montane Shrubland	2.859600000000000	Gm 5	Vulnerable	Grassland Biome	Mesic Highveld Grassland Bioregion	Poorly protected
Basotho Montane Shrubland	10.636500000000000	Gm 5	Vulnerable	Grassland Biome	Mesic Highveld Grassland Bioregion	Poorly protected
Basotho Montane Shrubland	1.765200000000000	Gm 5	Vulnerable	Grassland Biome	Mesic Highveld Grassland Bioregion	Poorly protected
Basotho Montane Shrubland	0.515000000000000	Gm 5	Vulnerable	Grassland Biome	Mesic Highveld Grassland Bioregion	Poorly protected
Basotho Montane Shrubland	35.503300000000003	Gm 5	Vulnerable	Grassland Biome	Mesic Highveld Grassland Bioregion	Poorly protected
Basotho Montane Shrubland	1.300500000000000	Gm 5	Vulnerable	Grassland Biome	Mesic Highveld Grassland Bioregion	Poorly protected
Basotho Montane Shrubland	1.701700000000000	Gm 5	Vulnerable	Grassland Biome	Mesic Highveld Grassland Bioregion	Poorly protected
Basotho Montane Shrubland	0.194500000000000	Gm 5	Vulnerable	Grassland Biome	Mesic Highveld Grassland Bioregion	Poorly protected
Basotho Montane Shrubland	2.765800000000000	Gm 5	Vulnerable	Grassland Biome	Mesic Highveld Grassland Bioregion	Poorly protected
Basotho Montane Shrubland	0.134900000000000	Gm 5	Vulnerable	Grassland Biome	Mesic Highveld Grassland Bioregion	Poorly protected
Basotho Montane Shrubland	2.185300000000000	Gm 5	Vulnerable	Grassland Biome	Mesic Highveld Grassland Bioregion	Poorly protected
Basotho Montane Shrubland	49.112099999999998	Gm 5	Vulnerable	Grassland Biome	Mesic Highveld Grassland Bioregion	Poorly protected
Basotho Montane Shrubland	8.272000000000000	Gm 5	Vulnerable	Grassland Biome	Mesic Highveld Grassland Bioregion	Poorly protected
Basotho Montane Shrubland	23.975700000000000	Gm 5	Vulnerable	Grassland Biome	Mesic Highveld Grassland Bioregion	Poorly protected
Basotho Montane Shrubland	0.978000000000000	Gm 5	Vulnerable	Grassland Biome	Mesic Highveld Grassland Bioregion	Poorly protected
Basotho Montane Shrubland	1.330800000000000	Gm 5	Vulnerable	Grassland Biome	Mesic Highveld Grassland Bioregion	Poorly protected
Basotho Montane Shrubland	15.696600000000000	Gm 5	Vulnerable	Grassland Biome	Mesic Highveld Grassland Bioregion	Poorly protected
Basotho Montane Shrubland	80.840199999999996	Gm 5	Vulnerable	Grassland Biome	Mesic Highveld Grassland Bioregion	Poorly protected
Basotho Montane Shrubland	3.464700000000000	Gm 5	Vulnerable	Grassland Biome	Mesic Highveld Grassland Bioregion	Poorly protected
Basotho Montane Shrubland	2.109000000000000	Gm 5	Vulnerable	Grassland Biome	Mesic Highveld Grassland Bioregion	Poorly protected
Basotho Montane Shrubland	8.039500000000000	Gm 5	Vulnerable	Grassland Biome	Mesic Highveld Grassland Bioregion	Poorly protected
Basotho Montane Shrubland	3.568100000000000	Gm 5	Vulnerable	Grassland Biome	Mesic Highveld Grassland Bioregion	Poorly protected
Basotho Montane Shrubland	9.376300000000001	Gm 5	Vulnerable	Grassland Biome	Mesic Highveld Grassland Bioregion	Poorly protected
Basotho Montane Shrubland	7.235000000000000	Gm 5	Vulnerable	Grassland Biome	Mesic Highveld Grassland Bioregion	Poorly protected
Basotho Montane Shrubland	2.813400000000000	Gm 5	Vulnerable	Grassland Biome	Mesic Highveld Grassland Bioregion	Poorly protected
Basotho Montane Shrubland	12.764900000000001	Gm 5	Vulnerable	Grassland Biome	Mesic Highveld Grassland Bioregion	Poorly protected
Basotho Montane Shrubland	9.867800000000001	Gm 5	Vulnerable	Grassland Biome	Mesic Highveld Grassland Bioregion	Poorly protected
Basotho Montane Shrubland	0.939000000000000	Gm 5	Vulnerable	Grassland Biome	Mesic Highveld Grassland Bioregion	Poorly protected
Basotho Montane Shrubland	10.697900000000001	Gm 5	Vulnerable	Grassland Biome	Mesic Highveld Grassland Bioregion	Poorly protected
Basotho Montane Shrubland	5.441500000000000	Gm 5	Vulnerable	Grassland Biome	Mesic Highveld Grassland Bioregion	Poorly protected
Basotho Montane Shrubland	571.088799999999992	Gm 5	Vulnerable	Grassland Biome	Mesic Highveld Grassland Bioregion	Poorly protected
Basotho Montane Shrubland	1.201100000000000	Gm 5	Vulnerable	Grassland Biome	Mesic Highveld Grassland Bioregion	Poorly protected
Basotho Montane Shrubland	5.353600000000000	Gm 5	Vulnerable	Grassland Biome	Mesic Highveld Grassland Bioregion	Poorly protected
Basotho Montane Shrubland	0.453100000000000	Gm 5	Vulnerable	Grassland Biome	Mesic Highveld Grassland Bioregion	Poorly protected
Basotho Montane Shrubland	5.006100000000000	Gm 5	Vulnerable	Grassland Biome	Mesic Highveld Grassland Bioregion	Poorly protected
Basotho Montane Shrubland	0.450900000000000	Gm 5	Vulnerable	Grassland Biome	Mesic Highveld Grassland Bioregion	Poorly protected
Basotho Montane Shrubland	6.562000000000000	Gm 5	Vulnerable	Grassland Biome	Mesic Highveld Grassland Bioregion	Poorly protected
Basotho Montane Shrubland	0.778100000000000	Gm 5	Vulnerable	Grassland Biome	Mesic Highveld Grassland Bioregion	Poorly protected
Basotho Montane Shrubland	10.251300000000001	Gm 5	Vulnerable	Grassland Biome	Mesic Highveld Grassland Bioregion	Poorly protected
Basotho Montane Shrubland	65.514099999999999	Gm 5	Vulnerable	Grassland Biome	Mesic Highveld Grassland Bioregion	Poorly protected
Basotho Montane Shrubland	2.493500000000000	Gm 5	Vulnerable	Grassland Biome	Mesic Highveld Grassland Bioregion	Poorly protected
Basotho Montane Shrubland	2.686200000000000	Gm 5	Vulnerable	Grassland Biome	Mesic Highveld Grassland Bioregion	Poorly protected
Basotho Montane Shrubland	6.951000000000000	Gm 5	Vulnerable	Grassland Biome	Mesic Highveld Grassland Bioregion	Poorly protected
Basotho Montane Shrubland	2.347500000000000	Gm 5	Vulnerable	Grassland Biome	Mesic Highveld Grassland Bioregion	Poorly protected
Basotho Montane Shrubland	3.219100000000000	Gm 5	Vulnerable	Grassland Biome	Mesic Highveld Grassland Bioregion	Poorly protected
Basotho Montane Shrubland	17.027300000000000	Gm 5	Vulnerable	Grassland Biome	Mesic Highveld Grassland Bioregion	Poorly protected
Basotho Montane Shrubland	2.856300000000000	Gm 5	Vulnerable	Grassland Biome	Mesic Highveld Grassland Bioregion	Poorly protected
Basotho Montane Shrubland	0.156000000000000	Gm 5	Vulnerable	Grassland Biome	Mesic Highveld Grassland Bioregion	Poorly protected
Basotho Montane Shrubland	0.306500000000000	Gm 5	Vulnerable	Grassland Biome	Mesic Highveld Grassland Bioregion	Poorly protected
Basotho Montane Shrubland	2.606600000000000	Gm 5	Vulnerable	Grassland Biome	Mesic Highveld Grassland Bioregion	Poorly protected
Basotho Montane Shrubland	7.658700000000000	Gm 5	Vulnerable	Grassland Biome	Mesic Highveld Grassland Bioregion	Poorly protected
Basotho Montane Shrubland	2.364600000000000	Gm 5	Vulnerable	Grassland Biome	Mesic Highveld Grassland Bioregion	Poorly protected
Basotho Montane Shrubland	6.421300000000000	Gm 5	Vulnerable	Grassland Biome	Mesic Highveld Grassland Bioregion	Poorly protected
Basotho Montane Shrubland	25.605699999999999	Gm 5	Vulnerable	Grassland Biome	Mesic Highveld Grassland Bioregion	Poorly protected
Basotho Montane Shrubland	15.841600000000000	Gm 5	Vulnerable	Grassland Biome	Mesic Highveld Grassland Bioregion	Poorly protected
Basotho Montane Shrubland	12.058900000000000	Gm 5	Vulnerable	Grassland Biome	Mesic Highveld Grassland Bioregion	Poorly protected
Basotho Montane Shrubland	3.427200000000000	Gm 5	Vulnerable	Grassland Biome	Mesic Highveld Grassland Bioregion	Poorly protected
Basotho Montane Shrubland	2.835400000000000	Gm 5	Vulnerable	Grassland Biome	Mesic Highveld Grassland Bioregion	Poorly protected
Basotho Montane Shrubland	3.484800000000000	Gm 5	Vulnerable	Grassland Biome	Mesic Highveld Grassland Bioregion	Poorly protected
Basotho Montane Shrubland	1.415600000000000	Gm 5	Vulnerable	Grassland Biome	Mesic Highveld Grassland Bioregion	Poorly protected
Basotho Montane Shrubland	0.725100000000000	Gm 5	Vulnerable	Grassland Biome	Mesic Highveld Grassland Bioregion	Poorly protected
Basotho Montane Shrubland	18.457799999999999	Gm 5	Vulnerable	Grassland Biome	Mesic Highveld Grassland Bioregion	Poorly protected
Basotho Montane Shrubland	0.204300000000000	Gm 5	Vulnerable	Grassland Biome	Mesic Highveld Grassland Bioregion	Poorly protected
Basotho Montane Shrubland	7.507400000000000	Gm 5	Vulnerable	Grassland Biome	Mesic Highveld Grassland Bioregion	Poorly protected
Basotho Montane Shrubland	6.096300000000000	Gm 5	Vulnerable	Grassland Biome	Mesic Highveld Grassland Bioregion	Poorly protected
Basotho Montane Shrubland	5.203600000000000	Gm 5	Vulnerable	Grassland Biome	Mesic Highveld Grassland Bioregion	Poorly protected
Basotho Montane Shrubland	2.384000000000000	Gm 5	Vulnerable	Grassland Biome	Mesic Highveld Grassland Bioregion	Poorly protected
Basotho Montane Shrubland	4.153700000000000	Gm 5	Vulnerable	Grassland Biome	Mesic Highveld Grassland Bioregion	Poorly protected
Basotho Montane Shrubland	3.261100000000000	Gm 5	Vulnerable	Grassland Biome	Mesic Highveld Grassland Bioregion	Poorly protected
Basotho Montane Shrubland	0.421300000000000	Gm 5	Vulnerable	Grassland Biome	Mesic Highveld Grassland Bioregion	Poorly protected
Basotho Montane Shrubland	2.764900000000000	Gm 5	Vulnerable	Grassland Biome	Mesic Highveld Grassland Bioregion	Poorly protected
Basotho Montane Shrubland	5.368000000000000	Gm 5	Vulnerable	Grassland Biome	Mesic Highveld Grassland Bioregion	Poorly protected
Basotho Montane Shrubland	2.876000000000000	Gm 5	Vulnerable	Grassland Biome	Mesic Highveld Grassland Bioregion	Poorly protected
Basotho Montane Shrubland	3.541900000000000	Gm 5	Vulnerable	Grassland Biome	Mesic Highveld Grassland Bioregion	Poorly protected
Basotho Montane Shrubland	142.141500000000008	Gm 5	Vulnerable	Grassland Biome	Mesic Highveld Grassland Bioregion	Poorly protected
Basotho Montane Shrubland	5.326300000000000	Gm 5	Vulnerable	Grassland Biome	Mesic Highveld Grassland Bioregion	Poorly protected
Basotho Montane Shrubland	2.184700000000000	Gm 5	Vulnerable	Grassland Biome	Mesic Highveld Grassland Bioregion	Poorly protected
Basotho Montane Shrubland	4.451200000000000	Gm 5	Vulnerable	Grassland Biome	Mesic Highveld Grassland Bioregion	Poorly protected
Basotho Montane Shrubland	5.596400000000000	Gm 5	Vulnerable	Grassland Biome	Mesic Highveld Grassland Bioregion	Poorly protected
Basotho Montane Shrubland	6.404300000000000	Gm 5	Vulnerable	Grassland Biome	Mesic Highveld Grassland Bioregion	Poorly protected
Basotho Montane Shrubland	3.198300000000000	Gm 5	Vulnerable	Grassland Biome	Mesic Highveld Grassland Bioregion	Poorly protected
Basotho Montane Shrubland	5.315400000000000	Gm 5	Vulnerable	Grassland Biome	Mesic Highveld Grassland Bioregion	Poorly protected
Basotho Montane Shrubland	10.086300000000000	Gm 5	Vulnerable	Grassland Biome	Mesic Highveld Grassland Bioregion	Poorly protected
Basotho Montane Shrubland	1.176400000000000	Gm 5	Vulnerable	Grassland Biome	Mesic Highveld Grassland Bioregion	Poorly protected
Basotho Montane Shrubland	85.778599999999997	Gm 5	Vulnerable	Grassland Biome	Mesic Highveld Grassland Bioregion	Poorly protected
Basotho Montane Shrubland	2.112700000000000	Gm 5	Vulnerable	Grassland Biome	Mesic Highveld Grassland Bioregion	Poorly protected
Basotho Montane Shrubland	10.911799999999999	Gm 5	Vulnerable	Grassland Biome	Mesic Highveld Grassland Bioregion	Poorly protected
Basotho Montane Shrubland	3.240700000000000	Gm 5	Vulnerable	Grassland Biome	Mesic Highveld Grassland Bioregion	Poorly protected
Basotho Montane Shrubland	0.271100000000000	Gm 5	Vulnerable	Grassland Biome	Mesic Highveld Grassland Bioregion	Poorly protected
Basotho Montane Shrubland	4.576100000000000	Gm 5	Vulnerable	Grassland Biome	Mesic Highveld Grassland Bioregion	Poorly protected
Basotho Montane Shrubland	3.345500000000000	Gm 5	Vulnerable	Grassland Biome	Mesic Highveld Grassland Bioregion	Poorly protected
Basotho Montane Shrubland	17.370200000000001	Gm 5	Vulnerable	Grassland Biome	Mesic Highveld Grassland Bioregion	Poorly protected
Basotho Montane Shrubland	23.708800000000000	Gm 5	Vulnerable	Grassland Biome	Mesic Highveld Grassland Bioregion	Poorly protected
Basotho Montane Shrubland	1.957400000000000	Gm 5	Vulnerable	Grassland Biome	Mesic Highveld Grassland Bioregion	Poorly protected
Basotho Montane Shrubland	0.712400000000000	Gm 5	Vulnerable	Grassland Biome	Mesic Highveld Grassland Bioregion	Poorly protected
Basotho Montane Shrubland	16.590800000000002	Gm 5	Vulnerable	Grassland Biome	Mesic Highveld Grassland Bioregion	Poorly protected
Baviaanskloof Shale Renosterveld	54.792200000000001	FRs 18	Least threatened	Fynbos Biome	Eastern Fynbos-Renosterveld Bioregion	Moderately protected
Baviaanskloof Shale Renosterveld	0.467300000000000	FRs 18	Least threatened	Fynbos Biome	Eastern Fynbos-Renosterveld Bioregion	Moderately protected
Baviaanskloof Shale Renosterveld	0.300500000000000	FRs 18	Least threatened	Fynbos Biome	Eastern Fynbos-Renosterveld Bioregion	Moderately protected
Baviaanskloof Shale Renosterveld	0.753900000000000	FRs 18	Least threatened	Fynbos Biome	Eastern Fynbos-Renosterveld Bioregion	Moderately protected
Baviaanskloof Shale Renosterveld	1.026200000000000	FRs 18	Least threatened	Fynbos Biome	Eastern Fynbos-Renosterveld Bioregion	Moderately protected
Baviaanskloof Shale Renosterveld	0.907700000000000	FRs 18	Least threatened	Fynbos Biome	Eastern Fynbos-Renosterveld Bioregion	Moderately protected
Baviaanskloof Shale Renosterveld	0.472700000000000	FRs 18	Least threatened	Fynbos Biome	Eastern Fynbos-Renosterveld Bioregion	Moderately protected
Baviaanskloof Shale Renosterveld	17.092400000000001	FRs 18	Least threatened	Fynbos Biome	Eastern Fynbos-Renosterveld Bioregion	Moderately protected
Baviaanskloof Shale Renosterveld	9.928500000000000	FRs 18	Least threatened	Fynbos Biome	Eastern Fynbos-Renosterveld Bioregion	Moderately protected
Baviaanskloof Shale Renosterveld	19.692000000000000	FRs 18	Least threatened	Fynbos Biome	Eastern Fynbos-Renosterveld Bioregion	Moderately protected
Baviaanskloof Shale Renosterveld	7.119900000000000	FRs 18	Least threatened	Fynbos Biome	Eastern Fynbos-Renosterveld Bioregion	Moderately protected
Baviaanskloof Shale Renosterveld	1.644800000000000	FRs 18	Least threatened	Fynbos Biome	Eastern Fynbos-Renosterveld Bioregion	Moderately protected
Baviaanskloof Shale Renosterveld	1.314100000000000	FRs 18	Least threatened	Fynbos Biome	Eastern Fynbos-Renosterveld Bioregion	Moderately protected
Baviaanskloof Shale Renosterveld	1.332700000000000	FRs 18	Least threatened	Fynbos Biome	Eastern Fynbos-Renosterveld Bioregion	Moderately protected
Baviaanskloof Shale Renosterveld	0.259200000000000	FRs 18	Least threatened	Fynbos Biome	Eastern Fynbos-Renosterveld Bioregion	Moderately protected
Baviaanskloof Shale Renosterveld	1.676000000000000	FRs 18	Least threatened	Fynbos Biome	Eastern Fynbos-Renosterveld Bioregion	Moderately protected
Bedford Dry Grassland	1.505500000000000	Gs 18	Least threatened	Grassland Biome	Sub-Escarpment Grassland Bioregion	Not protected
Bedford Dry Grassland	1290.076800000000048	Gs 18	Least threatened	Grassland Biome	Sub-Escarpment Grassland Bioregion	Not protected
Bedford Dry Grassland	457.804800000000000	Gs 18	Least threatened	Grassland Biome	Sub-Escarpment Grassland Bioregion	Not protected
Bedford Dry Grassland	21.964900000000000	Gs 18	Least threatened	Grassland Biome	Sub-Escarpment Grassland Bioregion	Not protected
Bedford Dry Grassland	136.759299999999996	Gs 18	Least threatened	Grassland Biome	Sub-Escarpment Grassland Bioregion	Not protected
Bedford Dry Grassland	45.051099999999998	Gs 18	Least threatened	Grassland Biome	Sub-Escarpment Grassland Bioregion	Not protected
Bedford Dry Grassland	97.705200000000005	Gs 18	Least threatened	Grassland Biome	Sub-Escarpment Grassland Bioregion	Not protected
Besemkaree Koppies Shrubland	2.307500000000000	Gh 4	Least threatened	Grassland Biome	Dry Highveld Grassland Bioregion	Poorly protected
Besemkaree Koppies Shrubland	4.192600000000000	Gh 4	Least threatened	Grassland Biome	Dry Highveld Grassland Bioregion	Poorly protected
Besemkaree Koppies Shrubland	4.659200000000000	Gh 4	Least threatened	Grassland Biome	Dry Highveld Grassland Bioregion	Poorly protected
Besemkaree Koppies Shrubland	1.908500000000000	Gh 4	Least threatened	Grassland Biome	Dry Highveld Grassland Bioregion	Poorly protected
Besemkaree Koppies Shrubland	0.996600000000000	Gh 4	Least threatened	Grassland Biome	Dry Highveld Grassland Bioregion	Poorly protected
Besemkaree Koppies Shrubland	2.538100000000000	Gh 4	Least threatened	Grassland Biome	Dry Highveld Grassland Bioregion	Poorly protected
Besemkaree Koppies Shrubland	1.068800000000000	Gh 4	Least threatened	Grassland Biome	Dry Highveld Grassland Bioregion	Poorly protected
Besemkaree Koppies Shrubland	5.113800000000000	Gh 4	Least threatened	Grassland Biome	Dry Highveld Grassland Bioregion	Poorly protected
Besemkaree Koppies Shrubland	87.480400000000003	Gh 4	Least threatened	Grassland Biome	Dry Highveld Grassland Bioregion	Poorly protected
Besemkaree Koppies Shrubland	2.471200000000000	Gh 4	Least threatened	Grassland Biome	Dry Highveld Grassland Bioregion	Poorly protected
Besemkaree Koppies Shrubland	4.277000000000000	Gh 4	Least threatened	Grassland Biome	Dry Highveld Grassland Bioregion	Poorly protected
Besemkaree Koppies Shrubland	2.677100000000000	Gh 4	Least threatened	Grassland Biome	Dry Highveld Grassland Bioregion	Poorly protected
Besemkaree Koppies Shrubland	5.280700000000000	Gh 4	Least threatened	Grassland Biome	Dry Highveld Grassland Bioregion	Poorly protected
Besemkaree Koppies Shrubland	10.100600000000000	Gh 4	Least threatened	Grassland Biome	Dry Highveld Grassland Bioregion	Poorly protected
Besemkaree Koppies Shrubland	3.507500000000000	Gh 4	Least threatened	Grassland Biome	Dry Highveld Grassland Bioregion	Poorly protected
Besemkaree Koppies Shrubland	22.731999999999999	Gh 4	Least threatened	Grassland Biome	Dry Highveld Grassland Bioregion	Poorly protected
Besemkaree Koppies Shrubland	3.734100000000000	Gh 4	Least threatened	Grassland Biome	Dry Highveld Grassland Bioregion	Poorly protected
Besemkaree Koppies Shrubland	5.362000000000000	Gh 4	Least threatened	Grassland Biome	Dry Highveld Grassland Bioregion	Poorly protected
Besemkaree Koppies Shrubland	37.776499999999999	Gh 4	Least threatened	Grassland Biome	Dry Highveld Grassland Bioregion	Poorly protected
Besemkaree Koppies Shrubland	6.243000000000000	Gh 4	Least threatened	Grassland Biome	Dry Highveld Grassland Bioregion	Poorly protected
Besemkaree Koppies Shrubland	1.581700000000000	Gh 4	Least threatened	Grassland Biome	Dry Highveld Grassland Bioregion	Poorly protected
Besemkaree Koppies Shrubland	87.782700000000006	Gh 4	Least threatened	Grassland Biome	Dry Highveld Grassland Bioregion	Poorly protected
Besemkaree Koppies Shrubland	11.859200000000000	Gh 4	Least threatened	Grassland Biome	Dry Highveld Grassland Bioregion	Poorly protected
Besemkaree Koppies Shrubland	356.687999999999988	Gh 4	Least threatened	Grassland Biome	Dry Highveld Grassland Bioregion	Poorly protected
Besemkaree Koppies Shrubland	15.656300000000000	Gh 4	Least threatened	Grassland Biome	Dry Highveld Grassland Bioregion	Poorly protected
Besemkaree Koppies Shrubland	1.354600000000000	Gh 4	Least threatened	Grassland Biome	Dry Highveld Grassland Bioregion	Poorly protected
Besemkaree Koppies Shrubland	1.666400000000000	Gh 4	Least threatened	Grassland Biome	Dry Highveld Grassland Bioregion	Poorly protected
Besemkaree Koppies Shrubland	3641.290700000000015	Gh 4	Least threatened	Grassland Biome	Dry Highveld Grassland Bioregion	Poorly protected
Besemkaree Koppies Shrubland	0.477900000000000	Gh 4	Least threatened	Grassland Biome	Dry Highveld Grassland Bioregion	Poorly protected
Besemkaree Koppies Shrubland	17.180399999999999	Gh 4	Least threatened	Grassland Biome	Dry Highveld Grassland Bioregion	Poorly protected
Besemkaree Koppies Shrubland	1.929500000000000	Gh 4	Least threatened	Grassland Biome	Dry Highveld Grassland Bioregion	Poorly protected
Besemkaree Koppies Shrubland	0.442500000000000	Gh 4	Least threatened	Grassland Biome	Dry Highveld Grassland Bioregion	Poorly protected
Besemkaree Koppies Shrubland	23.702600000000000	Gh 4	Least threatened	Grassland Biome	Dry Highveld Grassland Bioregion	Poorly protected
Besemkaree Koppies Shrubland	2.301400000000000	Gh 4	Least threatened	Grassland Biome	Dry Highveld Grassland Bioregion	Poorly protected
Besemkaree Koppies Shrubland	3.980400000000000	Gh 4	Least threatened	Grassland Biome	Dry Highveld Grassland Bioregion	Poorly protected
Besemkaree Koppies Shrubland	259.592300000000023	Gh 4	Least threatened	Grassland Biome	Dry Highveld Grassland Bioregion	Poorly protected
Besemkaree Koppies Shrubland	2.796300000000000	Gh 4	Least threatened	Grassland Biome	Dry Highveld Grassland Bioregion	Poorly protected
Besemkaree Koppies Shrubland	3.735100000000000	Gh 4	Least threatened	Grassland Biome	Dry Highveld Grassland Bioregion	Poorly protected
Besemkaree Koppies Shrubland	68.081199999999995	Gh 4	Least threatened	Grassland Biome	Dry Highveld Grassland Bioregion	Poorly protected
Besemkaree Koppies Shrubland	6.349700000000000	Gh 4	Least threatened	Grassland Biome	Dry Highveld Grassland Bioregion	Poorly protected
Besemkaree Koppies Shrubland	9.506600000000001	Gh 4	Least threatened	Grassland Biome	Dry Highveld Grassland Bioregion	Poorly protected
Besemkaree Koppies Shrubland	28.365200000000002	Gh 4	Least threatened	Grassland Biome	Dry Highveld Grassland Bioregion	Poorly protected
Besemkaree Koppies Shrubland	7.938300000000000	Gh 4	Least threatened	Grassland Biome	Dry Highveld Grassland Bioregion	Poorly protected
Besemkaree Koppies Shrubland	12.663000000000000	Gh 4	Least threatened	Grassland Biome	Dry Highveld Grassland Bioregion	Poorly protected
Besemkaree Koppies Shrubland	7.981800000000000	Gh 4	Least threatened	Grassland Biome	Dry Highveld Grassland Bioregion	Poorly protected
Besemkaree Koppies Shrubland	0.171400000000000	Gh 4	Least threatened	Grassland Biome	Dry Highveld Grassland Bioregion	Poorly protected
Besemkaree Koppies Shrubland	41.869999999999997	Gh 4	Least threatened	Grassland Biome	Dry Highveld Grassland Bioregion	Poorly protected
Besemkaree Koppies Shrubland	10.888800000000000	Gh 4	Least threatened	Grassland Biome	Dry Highveld Grassland Bioregion	Poorly protected
Besemkaree Koppies Shrubland	1.786300000000000	Gh 4	Least threatened	Grassland Biome	Dry Highveld Grassland Bioregion	Poorly protected
Besemkaree Koppies Shrubland	1.522700000000000	Gh 4	Least threatened	Grassland Biome	Dry Highveld Grassland Bioregion	Poorly protected
Besemkaree Koppies Shrubland	17.748600000000000	Gh 4	Least threatened	Grassland Biome	Dry Highveld Grassland Bioregion	Poorly protected
Besemkaree Koppies Shrubland	9.274600000000000	Gh 4	Least threatened	Grassland Biome	Dry Highveld Grassland Bioregion	Poorly protected
Besemkaree Koppies Shrubland	4.348800000000000	Gh 4	Least threatened	Grassland Biome	Dry Highveld Grassland Bioregion	Poorly protected
Besemkaree Koppies Shrubland	11.592000000000001	Gh 4	Least threatened	Grassland Biome	Dry Highveld Grassland Bioregion	Poorly protected
Besemkaree Koppies Shrubland	18.500800000000002	Gh 4	Least threatened	Grassland Biome	Dry Highveld Grassland Bioregion	Poorly protected
Besemkaree Koppies Shrubland	3.846000000000000	Gh 4	Least threatened	Grassland Biome	Dry Highveld Grassland Bioregion	Poorly protected
Besemkaree Koppies Shrubland	1.054800000000000	Gh 4	Least threatened	Grassland Biome	Dry Highveld Grassland Bioregion	Poorly protected
Besemkaree Koppies Shrubland	14.615500000000001	Gh 4	Least threatened	Grassland Biome	Dry Highveld Grassland Bioregion	Poorly protected
Besemkaree Koppies Shrubland	0.179400000000000	Gh 4	Least threatened	Grassland Biome	Dry Highveld Grassland Bioregion	Poorly protected
Besemkaree Koppies Shrubland	82.851399999999998	Gh 4	Least threatened	Grassland Biome	Dry Highveld Grassland Bioregion	Poorly protected
Besemkaree Koppies Shrubland	9.652500000000000	Gh 4	Least threatened	Grassland Biome	Dry Highveld Grassland Bioregion	Poorly protected
Besemkaree Koppies Shrubland	1.962600000000000	Gh 4	Least threatened	Grassland Biome	Dry Highveld Grassland Bioregion	Poorly protected
Besemkaree Koppies Shrubland	1.694500000000000	Gh 4	Least threatened	Grassland Biome	Dry Highveld Grassland Bioregion	Poorly protected
Besemkaree Koppies Shrubland	3.636100000000000	Gh 4	Least threatened	Grassland Biome	Dry Highveld Grassland Bioregion	Poorly protected
Besemkaree Koppies Shrubland	3.320300000000000	Gh 4	Least threatened	Grassland Biome	Dry Highveld Grassland Bioregion	Poorly protected
Besemkaree Koppies Shrubland	7.908500000000000	Gh 4	Least threatened	Grassland Biome	Dry Highveld Grassland Bioregion	Poorly protected
Besemkaree Koppies Shrubland	13.443300000000001	Gh 4	Least threatened	Grassland Biome	Dry Highveld Grassland Bioregion	Poorly protected
Besemkaree Koppies Shrubland	0.667900000000000	Gh 4	Least threatened	Grassland Biome	Dry Highveld Grassland Bioregion	Poorly protected
Besemkaree Koppies Shrubland	4.398600000000000	Gh 4	Least threatened	Grassland Biome	Dry Highveld Grassland Bioregion	Poorly protected
Besemkaree Koppies Shrubland	6.016500000000000	Gh 4	Least threatened	Grassland Biome	Dry Highveld Grassland Bioregion	Poorly protected
Besemkaree Koppies Shrubland	8.224600000000001	Gh 4	Least threatened	Grassland Biome	Dry Highveld Grassland Bioregion	Poorly protected
Besemkaree Koppies Shrubland	0.624500000000000	Gh 4	Least threatened	Grassland Biome	Dry Highveld Grassland Bioregion	Poorly protected
Besemkaree Koppies Shrubland	1.771200000000000	Gh 4	Least threatened	Grassland Biome	Dry Highveld Grassland Bioregion	Poorly protected
Besemkaree Koppies Shrubland	14.226900000000001	Gh 4	Least threatened	Grassland Biome	Dry Highveld Grassland Bioregion	Poorly protected
Besemkaree Koppies Shrubland	5.517500000000000	Gh 4	Least threatened	Grassland Biome	Dry Highveld Grassland Bioregion	Poorly protected
Besemkaree Koppies Shrubland	21.380600000000001	Gh 4	Least threatened	Grassland Biome	Dry Highveld Grassland Bioregion	Poorly protected
Besemkaree Koppies Shrubland	17.336099999999998	Gh 4	Least threatened	Grassland Biome	Dry Highveld Grassland Bioregion	Poorly protected
Besemkaree Koppies Shrubland	11.713300000000000	Gh 4	Least threatened	Grassland Biome	Dry Highveld Grassland Bioregion	Poorly protected
Besemkaree Koppies Shrubland	3.405700000000000	Gh 4	Least threatened	Grassland Biome	Dry Highveld Grassland Bioregion	Poorly protected
Besemkaree Koppies Shrubland	17.834199999999999	Gh 4	Least threatened	Grassland Biome	Dry Highveld Grassland Bioregion	Poorly protected
Besemkaree Koppies Shrubland	48.085200000000000	Gh 4	Least threatened	Grassland Biome	Dry Highveld Grassland Bioregion	Poorly protected
Besemkaree Koppies Shrubland	1.610100000000000	Gh 4	Least threatened	Grassland Biome	Dry Highveld Grassland Bioregion	Poorly protected
Besemkaree Koppies Shrubland	1.270500000000000	Gh 4	Least threatened	Grassland Biome	Dry Highveld Grassland Bioregion	Poorly protected
Besemkaree Koppies Shrubland	70.844600000000000	Gh 4	Least threatened	Grassland Biome	Dry Highveld Grassland Bioregion	Poorly protected
Besemkaree Koppies Shrubland	4.451100000000000	Gh 4	Least threatened	Grassland Biome	Dry Highveld Grassland Bioregion	Poorly protected
Besemkaree Koppies Shrubland	1.760400000000000	Gh 4	Least threatened	Grassland Biome	Dry Highveld Grassland Bioregion	Poorly protected
Besemkaree Koppies Shrubland	10.473699999999999	Gh 4	Least threatened	Grassland Biome	Dry Highveld Grassland Bioregion	Poorly protected
Besemkaree Koppies Shrubland	4.464700000000000	Gh 4	Least threatened	Grassland Biome	Dry Highveld Grassland Bioregion	Poorly protected
Besemkaree Koppies Shrubland	11.418200000000001	Gh 4	Least threatened	Grassland Biome	Dry Highveld Grassland Bioregion	Poorly protected
Besemkaree Koppies Shrubland	21.250299999999999	Gh 4	Least threatened	Grassland Biome	Dry Highveld Grassland Bioregion	Poorly protected
Besemkaree Koppies Shrubland	1.185900000000000	Gh 4	Least threatened	Grassland Biome	Dry Highveld Grassland Bioregion	Poorly protected
Besemkaree Koppies Shrubland	8.952999999999999	Gh 4	Least threatened	Grassland Biome	Dry Highveld Grassland Bioregion	Poorly protected
Besemkaree Koppies Shrubland	1.779500000000000	Gh 4	Least threatened	Grassland Biome	Dry Highveld Grassland Bioregion	Poorly protected
Besemkaree Koppies Shrubland	14.588400000000000	Gh 4	Least threatened	Grassland Biome	Dry Highveld Grassland Bioregion	Poorly protected
Besemkaree Koppies Shrubland	8.945900000000000	Gh 4	Least threatened	Grassland Biome	Dry Highveld Grassland Bioregion	Poorly protected
Besemkaree Koppies Shrubland	5.038200000000000	Gh 4	Least threatened	Grassland Biome	Dry Highveld Grassland Bioregion	Poorly protected
Besemkaree Koppies Shrubland	6.324800000000000	Gh 4	Least threatened	Grassland Biome	Dry Highveld Grassland Bioregion	Poorly protected
Besemkaree Koppies Shrubland	53.914700000000003	Gh 4	Least threatened	Grassland Biome	Dry Highveld Grassland Bioregion	Poorly protected
Besemkaree Koppies Shrubland	25.494800000000001	Gh 4	Least threatened	Grassland Biome	Dry Highveld Grassland Bioregion	Poorly protected
Besemkaree Koppies Shrubland	3.602200000000000	Gh 4	Least threatened	Grassland Biome	Dry Highveld Grassland Bioregion	Poorly protected
Besemkaree Koppies Shrubland	0.618000000000000	Gh 4	Least threatened	Grassland Biome	Dry Highveld Grassland Bioregion	Poorly protected
Besemkaree Koppies Shrubland	4.700600000000000	Gh 4	Least threatened	Grassland Biome	Dry Highveld Grassland Bioregion	Poorly protected
Besemkaree Koppies Shrubland	94.378699999999995	Gh 4	Least threatened	Grassland Biome	Dry Highveld Grassland Bioregion	Poorly protected
Besemkaree Koppies Shrubland	0.418400000000000	Gh 4	Least threatened	Grassland Biome	Dry Highveld Grassland Bioregion	Poorly protected
Besemkaree Koppies Shrubland	0.560100000000000	Gh 4	Least threatened	Grassland Biome	Dry Highveld Grassland Bioregion	Poorly protected
Besemkaree Koppies Shrubland	2.944000000000000	Gh 4	Least threatened	Grassland Biome	Dry Highveld Grassland Bioregion	Poorly protected
Besemkaree Koppies Shrubland	2.628500000000000	Gh 4	Least threatened	Grassland Biome	Dry Highveld Grassland Bioregion	Poorly protected
Besemkaree Koppies Shrubland	2.980800000000000	Gh 4	Least threatened	Grassland Biome	Dry Highveld Grassland Bioregion	Poorly protected
Besemkaree Koppies Shrubland	3.342900000000000	Gh 4	Least threatened	Grassland Biome	Dry Highveld Grassland Bioregion	Poorly protected
Besemkaree Koppies Shrubland	24.418399999999998	Gh 4	Least threatened	Grassland Biome	Dry Highveld Grassland Bioregion	Poorly protected
Besemkaree Koppies Shrubland	1.866300000000000	Gh 4	Least threatened	Grassland Biome	Dry Highveld Grassland Bioregion	Poorly protected
Besemkaree Koppies Shrubland	0.429200000000000	Gh 4	Least threatened	Grassland Biome	Dry Highveld Grassland Bioregion	Poorly protected
Besemkaree Koppies Shrubland	5.495000000000000	Gh 4	Least threatened	Grassland Biome	Dry Highveld Grassland Bioregion	Poorly protected
Besemkaree Koppies Shrubland	9.797900000000000	Gh 4	Least threatened	Grassland Biome	Dry Highveld Grassland Bioregion	Poorly protected
Besemkaree Koppies Shrubland	1.397000000000000	Gh 4	Least threatened	Grassland Biome	Dry Highveld Grassland Bioregion	Poorly protected
Besemkaree Koppies Shrubland	53.571100000000001	Gh 4	Least threatened	Grassland Biome	Dry Highveld Grassland Bioregion	Poorly protected
Besemkaree Koppies Shrubland	36.843600000000002	Gh 4	Least threatened	Grassland Biome	Dry Highveld Grassland Bioregion	Poorly protected
Besemkaree Koppies Shrubland	3.166400000000000	Gh 4	Least threatened	Grassland Biome	Dry Highveld Grassland Bioregion	Poorly protected
Besemkaree Koppies Shrubland	1.631300000000000	Gh 4	Least threatened	Grassland Biome	Dry Highveld Grassland Bioregion	Poorly protected
Besemkaree Koppies Shrubland	1.019300000000000	Gh 4	Least threatened	Grassland Biome	Dry Highveld Grassland Bioregion	Poorly protected
Besemkaree Koppies Shrubland	3.060700000000000	Gh 4	Least threatened	Grassland Biome	Dry Highveld Grassland Bioregion	Poorly protected
Besemkaree Koppies Shrubland	46.956000000000003	Gh 4	Least threatened	Grassland Biome	Dry Highveld Grassland Bioregion	Poorly protected
Besemkaree Koppies Shrubland	5.411900000000000	Gh 4	Least threatened	Grassland Biome	Dry Highveld Grassland Bioregion	Poorly protected
Besemkaree Koppies Shrubland	6.008200000000000	Gh 4	Least threatened	Grassland Biome	Dry Highveld Grassland Bioregion	Poorly protected
Besemkaree Koppies Shrubland	0.864400000000000	Gh 4	Least threatened	Grassland Biome	Dry Highveld Grassland Bioregion	Poorly protected
Besemkaree Koppies Shrubland	1.256800000000000	Gh 4	Least threatened	Grassland Biome	Dry Highveld Grassland Bioregion	Poorly protected
Besemkaree Koppies Shrubland	2.644100000000000	Gh 4	Least threatened	Grassland Biome	Dry Highveld Grassland Bioregion	Poorly protected
Besemkaree Koppies Shrubland	5.691700000000000	Gh 4	Least threatened	Grassland Biome	Dry Highveld Grassland Bioregion	Poorly protected
Besemkaree Koppies Shrubland	2.755100000000000	Gh 4	Least threatened	Grassland Biome	Dry Highveld Grassland Bioregion	Poorly protected
Besemkaree Koppies Shrubland	604.797100000000000	Gh 4	Least threatened	Grassland Biome	Dry Highveld Grassland Bioregion	Poorly protected
Besemkaree Koppies Shrubland	38.515700000000002	Gh 4	Least threatened	Grassland Biome	Dry Highveld Grassland Bioregion	Poorly protected
Besemkaree Koppies Shrubland	1.115500000000000	Gh 4	Least threatened	Grassland Biome	Dry Highveld Grassland Bioregion	Poorly protected
Besemkaree Koppies Shrubland	2.211600000000000	Gh 4	Least threatened	Grassland Biome	Dry Highveld Grassland Bioregion	Poorly protected
Besemkaree Koppies Shrubland	0.496300000000000	Gh 4	Least threatened	Grassland Biome	Dry Highveld Grassland Bioregion	Poorly protected
Besemkaree Koppies Shrubland	50.601300000000002	Gh 4	Least threatened	Grassland Biome	Dry Highveld Grassland Bioregion	Poorly protected
Besemkaree Koppies Shrubland	1.873400000000000	Gh 4	Least threatened	Grassland Biome	Dry Highveld Grassland Bioregion	Poorly protected
Besemkaree Koppies Shrubland	4.157200000000000	Gh 4	Least threatened	Grassland Biome	Dry Highveld Grassland Bioregion	Poorly protected
Besemkaree Koppies Shrubland	0.660100000000000	Gh 4	Least threatened	Grassland Biome	Dry Highveld Grassland Bioregion	Poorly protected
Besemkaree Koppies Shrubland	80.975300000000004	Gh 4	Least threatened	Grassland Biome	Dry Highveld Grassland Bioregion	Poorly protected
Besemkaree Koppies Shrubland	4.257200000000000	Gh 4	Least threatened	Grassland Biome	Dry Highveld Grassland Bioregion	Poorly protected
Besemkaree Koppies Shrubland	5.977800000000000	Gh 4	Least threatened	Grassland Biome	Dry Highveld Grassland Bioregion	Poorly protected
Besemkaree Koppies Shrubland	19.624900000000000	Gh 4	Least threatened	Grassland Biome	Dry Highveld Grassland Bioregion	Poorly protected
Besemkaree Koppies Shrubland	0.356500000000000	Gh 4	Least threatened	Grassland Biome	Dry Highveld Grassland Bioregion	Poorly protected
Besemkaree Koppies Shrubland	44.461900000000000	Gh 4	Least threatened	Grassland Biome	Dry Highveld Grassland Bioregion	Poorly protected
Besemkaree Koppies Shrubland	0.756100000000000	Gh 4	Least threatened	Grassland Biome	Dry Highveld Grassland Bioregion	Poorly protected
Besemkaree Koppies Shrubland	3.594000000000000	Gh 4	Least threatened	Grassland Biome	Dry Highveld Grassland Bioregion	Poorly protected
Besemkaree Koppies Shrubland	13.410900000000000	Gh 4	Least threatened	Grassland Biome	Dry Highveld Grassland Bioregion	Poorly protected
Besemkaree Koppies Shrubland	0.499900000000000	Gh 4	Least threatened	Grassland Biome	Dry Highveld Grassland Bioregion	Poorly protected
Besemkaree Koppies Shrubland	4.198100000000000	Gh 4	Least threatened	Grassland Biome	Dry Highveld Grassland Bioregion	Poorly protected
Besemkaree Koppies Shrubland	3.213600000000000	Gh 4	Least threatened	Grassland Biome	Dry Highveld Grassland Bioregion	Poorly protected
Besemkaree Koppies Shrubland	6.966000000000000	Gh 4	Least threatened	Grassland Biome	Dry Highveld Grassland Bioregion	Poorly protected
Besemkaree Koppies Shrubland	104.988200000000006	Gh 4	Least threatened	Grassland Biome	Dry Highveld Grassland Bioregion	Poorly protected
Besemkaree Koppies Shrubland	3.000100000000000	Gh 4	Least threatened	Grassland Biome	Dry Highveld Grassland Bioregion	Poorly protected
Besemkaree Koppies Shrubland	1.288500000000000	Gh 4	Least threatened	Grassland Biome	Dry Highveld Grassland Bioregion	Poorly protected
Besemkaree Koppies Shrubland	3.963900000000000	Gh 4	Least threatened	Grassland Biome	Dry Highveld Grassland Bioregion	Poorly protected
Besemkaree Koppies Shrubland	82.499899999999997	Gh 4	Least threatened	Grassland Biome	Dry Highveld Grassland Bioregion	Poorly protected
Besemkaree Koppies Shrubland	1.272600000000000	Gh 4	Least threatened	Grassland Biome	Dry Highveld Grassland Bioregion	Poorly protected
Besemkaree Koppies Shrubland	2.736900000000000	Gh 4	Least threatened	Grassland Biome	Dry Highveld Grassland Bioregion	Poorly protected
Besemkaree Koppies Shrubland	36.914999999999999	Gh 4	Least threatened	Grassland Biome	Dry Highveld Grassland Bioregion	Poorly protected
Besemkaree Koppies Shrubland	5.500100000000000	Gh 4	Least threatened	Grassland Biome	Dry Highveld Grassland Bioregion	Poorly protected
Besemkaree Koppies Shrubland	2.623800000000000	Gh 4	Least threatened	Grassland Biome	Dry Highveld Grassland Bioregion	Poorly protected
Besemkaree Koppies Shrubland	1.591200000000000	Gh 4	Least threatened	Grassland Biome	Dry Highveld Grassland Bioregion	Poorly protected
Besemkaree Koppies Shrubland	5.290500000000000	Gh 4	Least threatened	Grassland Biome	Dry Highveld Grassland Bioregion	Poorly protected
Besemkaree Koppies Shrubland	1.707100000000000	Gh 4	Least threatened	Grassland Biome	Dry Highveld Grassland Bioregion	Poorly protected
Besemkaree Koppies Shrubland	1.565200000000000	Gh 4	Least threatened	Grassland Biome	Dry Highveld Grassland Bioregion	Poorly protected
Besemkaree Koppies Shrubland	5.036500000000000	Gh 4	Least threatened	Grassland Biome	Dry Highveld Grassland Bioregion	Poorly protected
Besemkaree Koppies Shrubland	1.123500000000000	Gh 4	Least threatened	Grassland Biome	Dry Highveld Grassland Bioregion	Poorly protected
Besemkaree Koppies Shrubland	2.774500000000000	Gh 4	Least threatened	Grassland Biome	Dry Highveld Grassland Bioregion	Poorly protected
Besemkaree Koppies Shrubland	0.534700000000000	Gh 4	Least threatened	Grassland Biome	Dry Highveld Grassland Bioregion	Poorly protected
Besemkaree Koppies Shrubland	1.530300000000000	Gh 4	Least threatened	Grassland Biome	Dry Highveld Grassland Bioregion	Poorly protected
Besemkaree Koppies Shrubland	0.878200000000000	Gh 4	Least threatened	Grassland Biome	Dry Highveld Grassland Bioregion	Poorly protected
Besemkaree Koppies Shrubland	17.421800000000001	Gh 4	Least threatened	Grassland Biome	Dry Highveld Grassland Bioregion	Poorly protected
Besemkaree Koppies Shrubland	1.140400000000000	Gh 4	Least threatened	Grassland Biome	Dry Highveld Grassland Bioregion	Poorly protected
Besemkaree Koppies Shrubland	41.374200000000002	Gh 4	Least threatened	Grassland Biome	Dry Highveld Grassland Bioregion	Poorly protected
Besemkaree Koppies Shrubland	4.600800000000000	Gh 4	Least threatened	Grassland Biome	Dry Highveld Grassland Bioregion	Poorly protected
Besemkaree Koppies Shrubland	0.740400000000000	Gh 4	Least threatened	Grassland Biome	Dry Highveld Grassland Bioregion	Poorly protected
Besemkaree Koppies Shrubland	7.821500000000000	Gh 4	Least threatened	Grassland Biome	Dry Highveld Grassland Bioregion	Poorly protected
Besemkaree Koppies Shrubland	256.773399999999981	Gh 4	Least threatened	Grassland Biome	Dry Highveld Grassland Bioregion	Poorly protected
Besemkaree Koppies Shrubland	0.381500000000000	Gh 4	Least threatened	Grassland Biome	Dry Highveld Grassland Bioregion	Poorly protected
Besemkaree Koppies Shrubland	0.453200000000000	Gh 4	Least threatened	Grassland Biome	Dry Highveld Grassland Bioregion	Poorly protected
Besemkaree Koppies Shrubland	3.186200000000000	Gh 4	Least threatened	Grassland Biome	Dry Highveld Grassland Bioregion	Poorly protected
Besemkaree Koppies Shrubland	15.564800000000000	Gh 4	Least threatened	Grassland Biome	Dry Highveld Grassland Bioregion	Poorly protected
Besemkaree Koppies Shrubland	8.720200000000000	Gh 4	Least threatened	Grassland Biome	Dry Highveld Grassland Bioregion	Poorly protected
Besemkaree Koppies Shrubland	3.943300000000000	Gh 4	Least threatened	Grassland Biome	Dry Highveld Grassland Bioregion	Poorly protected
Besemkaree Koppies Shrubland	0.744900000000000	Gh 4	Least threatened	Grassland Biome	Dry Highveld Grassland Bioregion	Poorly protected
Besemkaree Koppies Shrubland	20.146000000000001	Gh 4	Least threatened	Grassland Biome	Dry Highveld Grassland Bioregion	Poorly protected
Besemkaree Koppies Shrubland	1.038700000000000	Gh 4	Least threatened	Grassland Biome	Dry Highveld Grassland Bioregion	Poorly protected
Besemkaree Koppies Shrubland	2.275300000000000	Gh 4	Least threatened	Grassland Biome	Dry Highveld Grassland Bioregion	Poorly protected
Besemkaree Koppies Shrubland	5.716100000000000	Gh 4	Least threatened	Grassland Biome	Dry Highveld Grassland Bioregion	Poorly protected
Besemkaree Koppies Shrubland	1.252900000000000	Gh 4	Least threatened	Grassland Biome	Dry Highveld Grassland Bioregion	Poorly protected
Besemkaree Koppies Shrubland	0.724100000000000	Gh 4	Least threatened	Grassland Biome	Dry Highveld Grassland Bioregion	Poorly protected
Besemkaree Koppies Shrubland	4.775900000000000	Gh 4	Least threatened	Grassland Biome	Dry Highveld Grassland Bioregion	Poorly protected
Besemkaree Koppies Shrubland	16.450800000000001	Gh 4	Least threatened	Grassland Biome	Dry Highveld Grassland Bioregion	Poorly protected
Besemkaree Koppies Shrubland	3.991100000000000	Gh 4	Least threatened	Grassland Biome	Dry Highveld Grassland Bioregion	Poorly protected
Besemkaree Koppies Shrubland	29.655000000000001	Gh 4	Least threatened	Grassland Biome	Dry Highveld Grassland Bioregion	Poorly protected
Besemkaree Koppies Shrubland	0.375600000000000	Gh 4	Least threatened	Grassland Biome	Dry Highveld Grassland Bioregion	Poorly protected
Besemkaree Koppies Shrubland	2.122300000000000	Gh 4	Least threatened	Grassland Biome	Dry Highveld Grassland Bioregion	Poorly protected
Besemkaree Koppies Shrubland	8.709300000000001	Gh 4	Least threatened	Grassland Biome	Dry Highveld Grassland Bioregion	Poorly protected
Besemkaree Koppies Shrubland	0.273900000000000	Gh 4	Least threatened	Grassland Biome	Dry Highveld Grassland Bioregion	Poorly protected
Besemkaree Koppies Shrubland	8.844400000000000	Gh 4	Least threatened	Grassland Biome	Dry Highveld Grassland Bioregion	Poorly protected
Besemkaree Koppies Shrubland	6.653100000000000	Gh 4	Least threatened	Grassland Biome	Dry Highveld Grassland Bioregion	Poorly protected
Besemkaree Koppies Shrubland	3.963900000000000	Gh 4	Least threatened	Grassland Biome	Dry Highveld Grassland Bioregion	Poorly protected
Besemkaree Koppies Shrubland	4.738700000000000	Gh 4	Least threatened	Grassland Biome	Dry Highveld Grassland Bioregion	Poorly protected
Besemkaree Koppies Shrubland	2.972200000000000	Gh 4	Least threatened	Grassland Biome	Dry Highveld Grassland Bioregion	Poorly protected
Besemkaree Koppies Shrubland	18.546199999999999	Gh 4	Least threatened	Grassland Biome	Dry Highveld Grassland Bioregion	Poorly protected
Besemkaree Koppies Shrubland	2.235500000000000	Gh 4	Least threatened	Grassland Biome	Dry Highveld Grassland Bioregion	Poorly protected
Besemkaree Koppies Shrubland	11.439900000000000	Gh 4	Least threatened	Grassland Biome	Dry Highveld Grassland Bioregion	Poorly protected
Besemkaree Koppies Shrubland	24.859500000000001	Gh 4	Least threatened	Grassland Biome	Dry Highveld Grassland Bioregion	Poorly protected
Besemkaree Koppies Shrubland	1.850700000000000	Gh 4	Least threatened	Grassland Biome	Dry Highveld Grassland Bioregion	Poorly protected
Besemkaree Koppies Shrubland	6.179400000000000	Gh 4	Least threatened	Grassland Biome	Dry Highveld Grassland Bioregion	Poorly protected
Besemkaree Koppies Shrubland	0.820600000000000	Gh 4	Least threatened	Grassland Biome	Dry Highveld Grassland Bioregion	Poorly protected
Besemkaree Koppies Shrubland	18.281400000000001	Gh 4	Least threatened	Grassland Biome	Dry Highveld Grassland Bioregion	Poorly protected
Besemkaree Koppies Shrubland	55.780999999999999	Gh 4	Least threatened	Grassland Biome	Dry Highveld Grassland Bioregion	Poorly protected
Besemkaree Koppies Shrubland	2.540000000000000	Gh 4	Least threatened	Grassland Biome	Dry Highveld Grassland Bioregion	Poorly protected
Besemkaree Koppies Shrubland	0.119900000000000	Gh 4	Least threatened	Grassland Biome	Dry Highveld Grassland Bioregion	Poorly protected
Besemkaree Koppies Shrubland	10.065300000000001	Gh 4	Least threatened	Grassland Biome	Dry Highveld Grassland Bioregion	Poorly protected
Besemkaree Koppies Shrubland	0.053500000000000	Gh 4	Least threatened	Grassland Biome	Dry Highveld Grassland Bioregion	Poorly protected
Besemkaree Koppies Shrubland	0.595100000000000	Gh 4	Least threatened	Grassland Biome	Dry Highveld Grassland Bioregion	Poorly protected
Besemkaree Koppies Shrubland	0.998700000000000	Gh 4	Least threatened	Grassland Biome	Dry Highveld Grassland Bioregion	Poorly protected
Besemkaree Koppies Shrubland	3.461100000000000	Gh 4	Least threatened	Grassland Biome	Dry Highveld Grassland Bioregion	Poorly protected
Besemkaree Koppies Shrubland	9.557100000000000	Gh 4	Least threatened	Grassland Biome	Dry Highveld Grassland Bioregion	Poorly protected
Besemkaree Koppies Shrubland	0.958900000000000	Gh 4	Least threatened	Grassland Biome	Dry Highveld Grassland Bioregion	Poorly protected
Besemkaree Koppies Shrubland	1.646000000000000	Gh 4	Least threatened	Grassland Biome	Dry Highveld Grassland Bioregion	Poorly protected
Besemkaree Koppies Shrubland	1.261100000000000	Gh 4	Least threatened	Grassland Biome	Dry Highveld Grassland Bioregion	Poorly protected
Besemkaree Koppies Shrubland	2.853900000000000	Gh 4	Least threatened	Grassland Biome	Dry Highveld Grassland Bioregion	Poorly protected
Besemkaree Koppies Shrubland	9.952000000000000	Gh 4	Least threatened	Grassland Biome	Dry Highveld Grassland Bioregion	Poorly protected
Besemkaree Koppies Shrubland	2.090200000000000	Gh 4	Least threatened	Grassland Biome	Dry Highveld Grassland Bioregion	Poorly protected
Besemkaree Koppies Shrubland	2.610300000000000	Gh 4	Least threatened	Grassland Biome	Dry Highveld Grassland Bioregion	Poorly protected
Besemkaree Koppies Shrubland	22.242300000000000	Gh 4	Least threatened	Grassland Biome	Dry Highveld Grassland Bioregion	Poorly protected
Besemkaree Koppies Shrubland	30.050599999999999	Gh 4	Least threatened	Grassland Biome	Dry Highveld Grassland Bioregion	Poorly protected
Besemkaree Koppies Shrubland	0.845300000000000	Gh 4	Least threatened	Grassland Biome	Dry Highveld Grassland Bioregion	Poorly protected
Besemkaree Koppies Shrubland	22.027200000000001	Gh 4	Least threatened	Grassland Biome	Dry Highveld Grassland Bioregion	Poorly protected
Besemkaree Koppies Shrubland	1.549000000000000	Gh 4	Least threatened	Grassland Biome	Dry Highveld Grassland Bioregion	Poorly protected
Besemkaree Koppies Shrubland	1.817200000000000	Gh 4	Least threatened	Grassland Biome	Dry Highveld Grassland Bioregion	Poorly protected
Besemkaree Koppies Shrubland	35.546799999999998	Gh 4	Least threatened	Grassland Biome	Dry Highveld Grassland Bioregion	Poorly protected
Besemkaree Koppies Shrubland	1.129500000000000	Gh 4	Least threatened	Grassland Biome	Dry Highveld Grassland Bioregion	Poorly protected
Besemkaree Koppies Shrubland	66.918199999999999	Gh 4	Least threatened	Grassland Biome	Dry Highveld Grassland Bioregion	Poorly protected
Besemkaree Koppies Shrubland	44.412100000000002	Gh 4	Least threatened	Grassland Biome	Dry Highveld Grassland Bioregion	Poorly protected
Besemkaree Koppies Shrubland	0.465100000000000	Gh 4	Least threatened	Grassland Biome	Dry Highveld Grassland Bioregion	Poorly protected
Besemkaree Koppies Shrubland	1.271100000000000	Gh 4	Least threatened	Grassland Biome	Dry Highveld Grassland Bioregion	Poorly protected
Besemkaree Koppies Shrubland	2.245400000000000	Gh 4	Least threatened	Grassland Biome	Dry Highveld Grassland Bioregion	Poorly protected
Besemkaree Koppies Shrubland	17.459399999999999	Gh 4	Least threatened	Grassland Biome	Dry Highveld Grassland Bioregion	Poorly protected
Besemkaree Koppies Shrubland	6.995600000000000	Gh 4	Least threatened	Grassland Biome	Dry Highveld Grassland Bioregion	Poorly protected
Besemkaree Koppies Shrubland	3.328700000000000	Gh 4	Least threatened	Grassland Biome	Dry Highveld Grassland Bioregion	Poorly protected
Besemkaree Koppies Shrubland	71.236800000000002	Gh 4	Least threatened	Grassland Biome	Dry Highveld Grassland Bioregion	Poorly protected
Besemkaree Koppies Shrubland	9.059100000000001	Gh 4	Least threatened	Grassland Biome	Dry Highveld Grassland Bioregion	Poorly protected
Besemkaree Koppies Shrubland	7.283100000000000	Gh 4	Least threatened	Grassland Biome	Dry Highveld Grassland Bioregion	Poorly protected
Besemkaree Koppies Shrubland	0.772000000000000	Gh 4	Least threatened	Grassland Biome	Dry Highveld Grassland Bioregion	Poorly protected
Besemkaree Koppies Shrubland	0.898000000000000	Gh 4	Least threatened	Grassland Biome	Dry Highveld Grassland Bioregion	Poorly protected
Besemkaree Koppies Shrubland	0.497500000000000	Gh 4	Least threatened	Grassland Biome	Dry Highveld Grassland Bioregion	Poorly protected
Besemkaree Koppies Shrubland	5.444700000000000	Gh 4	Least threatened	Grassland Biome	Dry Highveld Grassland Bioregion	Poorly protected
Besemkaree Koppies Shrubland	6.899500000000000	Gh 4	Least threatened	Grassland Biome	Dry Highveld Grassland Bioregion	Poorly protected
Besemkaree Koppies Shrubland	0.761800000000000	Gh 4	Least threatened	Grassland Biome	Dry Highveld Grassland Bioregion	Poorly protected
Besemkaree Koppies Shrubland	6.540000000000000	Gh 4	Least threatened	Grassland Biome	Dry Highveld Grassland Bioregion	Poorly protected
Besemkaree Koppies Shrubland	4.556900000000000	Gh 4	Least threatened	Grassland Biome	Dry Highveld Grassland Bioregion	Poorly protected
Besemkaree Koppies Shrubland	2.543900000000000	Gh 4	Least threatened	Grassland Biome	Dry Highveld Grassland Bioregion	Poorly protected
Besemkaree Koppies Shrubland	3.130600000000000	Gh 4	Least threatened	Grassland Biome	Dry Highveld Grassland Bioregion	Poorly protected
Besemkaree Koppies Shrubland	14.871400000000000	Gh 4	Least threatened	Grassland Biome	Dry Highveld Grassland Bioregion	Poorly protected
Besemkaree Koppies Shrubland	18.073300000000000	Gh 4	Least threatened	Grassland Biome	Dry Highveld Grassland Bioregion	Poorly protected
Besemkaree Koppies Shrubland	29.479399999999998	Gh 4	Least threatened	Grassland Biome	Dry Highveld Grassland Bioregion	Poorly protected
Besemkaree Koppies Shrubland	0.953000000000000	Gh 4	Least threatened	Grassland Biome	Dry Highveld Grassland Bioregion	Poorly protected
Besemkaree Koppies Shrubland	1.317600000000000	Gh 4	Least threatened	Grassland Biome	Dry Highveld Grassland Bioregion	Poorly protected
Besemkaree Koppies Shrubland	17.647400000000001	Gh 4	Least threatened	Grassland Biome	Dry Highveld Grassland Bioregion	Poorly protected
Besemkaree Koppies Shrubland	26.594100000000001	Gh 4	Least threatened	Grassland Biome	Dry Highveld Grassland Bioregion	Poorly protected
Besemkaree Koppies Shrubland	0.184100000000000	Gh 4	Least threatened	Grassland Biome	Dry Highveld Grassland Bioregion	Poorly protected
Besemkaree Koppies Shrubland	11.743100000000000	Gh 4	Least threatened	Grassland Biome	Dry Highveld Grassland Bioregion	Poorly protected
Besemkaree Koppies Shrubland	5.863900000000000	Gh 4	Least threatened	Grassland Biome	Dry Highveld Grassland Bioregion	Poorly protected
Besemkaree Koppies Shrubland	27.226600000000001	Gh 4	Least threatened	Grassland Biome	Dry Highveld Grassland Bioregion	Poorly protected
Besemkaree Koppies Shrubland	2.039800000000000	Gh 4	Least threatened	Grassland Biome	Dry Highveld Grassland Bioregion	Poorly protected
Besemkaree Koppies Shrubland	2.052900000000000	Gh 4	Least threatened	Grassland Biome	Dry Highveld Grassland Bioregion	Poorly protected
Besemkaree Koppies Shrubland	1.033600000000000	Gh 4	Least threatened	Grassland Biome	Dry Highveld Grassland Bioregion	Poorly protected
Besemkaree Koppies Shrubland	60.865499999999997	Gh 4	Least threatened	Grassland Biome	Dry Highveld Grassland Bioregion	Poorly protected
Besemkaree Koppies Shrubland	0.845700000000000	Gh 4	Least threatened	Grassland Biome	Dry Highveld Grassland Bioregion	Poorly protected
Besemkaree Koppies Shrubland	46.997799999999998	Gh 4	Least threatened	Grassland Biome	Dry Highveld Grassland Bioregion	Poorly protected
Besemkaree Koppies Shrubland	5.474400000000000	Gh 4	Least threatened	Grassland Biome	Dry Highveld Grassland Bioregion	Poorly protected
Besemkaree Koppies Shrubland	5.517500000000000	Gh 4	Least threatened	Grassland Biome	Dry Highveld Grassland Bioregion	Poorly protected
Besemkaree Koppies Shrubland	6.086900000000000	Gh 4	Least threatened	Grassland Biome	Dry Highveld Grassland Bioregion	Poorly protected
Besemkaree Koppies Shrubland	3.226200000000000	Gh 4	Least threatened	Grassland Biome	Dry Highveld Grassland Bioregion	Poorly protected
Besemkaree Koppies Shrubland	1.594900000000000	Gh 4	Least threatened	Grassland Biome	Dry Highveld Grassland Bioregion	Poorly protected
Besemkaree Koppies Shrubland	37.537199999999999	Gh 4	Least threatened	Grassland Biome	Dry Highveld Grassland Bioregion	Poorly protected
Besemkaree Koppies Shrubland	7.438300000000000	Gh 4	Least threatened	Grassland Biome	Dry Highveld Grassland Bioregion	Poorly protected
Besemkaree Koppies Shrubland	44.684699999999999	Gh 4	Least threatened	Grassland Biome	Dry Highveld Grassland Bioregion	Poorly protected
Besemkaree Koppies Shrubland	93.607799999999997	Gh 4	Least threatened	Grassland Biome	Dry Highveld Grassland Bioregion	Poorly protected
Besemkaree Koppies Shrubland	64.593900000000005	Gh 4	Least threatened	Grassland Biome	Dry Highveld Grassland Bioregion	Poorly protected
Besemkaree Koppies Shrubland	56.624000000000002	Gh 4	Least threatened	Grassland Biome	Dry Highveld Grassland Bioregion	Poorly protected
Besemkaree Koppies Shrubland	9.776100000000000	Gh 4	Least threatened	Grassland Biome	Dry Highveld Grassland Bioregion	Poorly protected
Besemkaree Koppies Shrubland	19.157299999999999	Gh 4	Least threatened	Grassland Biome	Dry Highveld Grassland Bioregion	Poorly protected
Besemkaree Koppies Shrubland	7.274000000000000	Gh 4	Least threatened	Grassland Biome	Dry Highveld Grassland Bioregion	Poorly protected
Besemkaree Koppies Shrubland	0.825900000000000	Gh 4	Least threatened	Grassland Biome	Dry Highveld Grassland Bioregion	Poorly protected
Besemkaree Koppies Shrubland	9.040800000000001	Gh 4	Least threatened	Grassland Biome	Dry Highveld Grassland Bioregion	Poorly protected
Besemkaree Koppies Shrubland	1.340300000000000	Gh 4	Least threatened	Grassland Biome	Dry Highveld Grassland Bioregion	Poorly protected
Besemkaree Koppies Shrubland	240.161499999999990	Gh 4	Least threatened	Grassland Biome	Dry Highveld Grassland Bioregion	Poorly protected
Besemkaree Koppies Shrubland	3.505300000000000	Gh 4	Least threatened	Grassland Biome	Dry Highveld Grassland Bioregion	Poorly protected
Besemkaree Koppies Shrubland	12.565200000000001	Gh 4	Least threatened	Grassland Biome	Dry Highveld Grassland Bioregion	Poorly protected
Besemkaree Koppies Shrubland	0.566700000000000	Gh 4	Least threatened	Grassland Biome	Dry Highveld Grassland Bioregion	Poorly protected
Besemkaree Koppies Shrubland	11.878700000000000	Gh 4	Least threatened	Grassland Biome	Dry Highveld Grassland Bioregion	Poorly protected
Besemkaree Koppies Shrubland	7.058900000000000	Gh 4	Least threatened	Grassland Biome	Dry Highveld Grassland Bioregion	Poorly protected
Besemkaree Koppies Shrubland	1.158200000000000	Gh 4	Least threatened	Grassland Biome	Dry Highveld Grassland Bioregion	Poorly protected
Besemkaree Koppies Shrubland	11.593700000000000	Gh 4	Least threatened	Grassland Biome	Dry Highveld Grassland Bioregion	Poorly protected
Besemkaree Koppies Shrubland	13.612399999999999	Gh 4	Least threatened	Grassland Biome	Dry Highveld Grassland Bioregion	Poorly protected
Besemkaree Koppies Shrubland	4.459800000000000	Gh 4	Least threatened	Grassland Biome	Dry Highveld Grassland Bioregion	Poorly protected
Besemkaree Koppies Shrubland	14.304000000000000	Gh 4	Least threatened	Grassland Biome	Dry Highveld Grassland Bioregion	Poorly protected
Besemkaree Koppies Shrubland	1.858700000000000	Gh 4	Least threatened	Grassland Biome	Dry Highveld Grassland Bioregion	Poorly protected
Besemkaree Koppies Shrubland	8.966699999999999	Gh 4	Least threatened	Grassland Biome	Dry Highveld Grassland Bioregion	Poorly protected
Besemkaree Koppies Shrubland	1.858300000000000	Gh 4	Least threatened	Grassland Biome	Dry Highveld Grassland Bioregion	Poorly protected
Besemkaree Koppies Shrubland	3.101500000000000	Gh 4	Least threatened	Grassland Biome	Dry Highveld Grassland Bioregion	Poorly protected
Besemkaree Koppies Shrubland	4.866800000000000	Gh 4	Least threatened	Grassland Biome	Dry Highveld Grassland Bioregion	Poorly protected
Besemkaree Koppies Shrubland	7.047500000000000	Gh 4	Least threatened	Grassland Biome	Dry Highveld Grassland Bioregion	Poorly protected
Besemkaree Koppies Shrubland	1.643500000000000	Gh 4	Least threatened	Grassland Biome	Dry Highveld Grassland Bioregion	Poorly protected
Besemkaree Koppies Shrubland	2.059400000000000	Gh 4	Least threatened	Grassland Biome	Dry Highveld Grassland Bioregion	Poorly protected
Besemkaree Koppies Shrubland	1.327800000000000	Gh 4	Least threatened	Grassland Biome	Dry Highveld Grassland Bioregion	Poorly protected
Besemkaree Koppies Shrubland	15.330100000000000	Gh 4	Least threatened	Grassland Biome	Dry Highveld Grassland Bioregion	Poorly protected
Besemkaree Koppies Shrubland	14.137499999999999	Gh 4	Least threatened	Grassland Biome	Dry Highveld Grassland Bioregion	Poorly protected
Besemkaree Koppies Shrubland	7.759500000000000	Gh 4	Least threatened	Grassland Biome	Dry Highveld Grassland Bioregion	Poorly protected
Besemkaree Koppies Shrubland	10.702299999999999	Gh 4	Least threatened	Grassland Biome	Dry Highveld Grassland Bioregion	Poorly protected
Besemkaree Koppies Shrubland	27.523399999999999	Gh 4	Least threatened	Grassland Biome	Dry Highveld Grassland Bioregion	Poorly protected
Besemkaree Koppies Shrubland	121.981899999999996	Gh 4	Least threatened	Grassland Biome	Dry Highveld Grassland Bioregion	Poorly protected
Besemkaree Koppies Shrubland	2.612100000000000	Gh 4	Least threatened	Grassland Biome	Dry Highveld Grassland Bioregion	Poorly protected
Besemkaree Koppies Shrubland	3.054700000000000	Gh 4	Least threatened	Grassland Biome	Dry Highveld Grassland Bioregion	Poorly protected
Besemkaree Koppies Shrubland	2.029800000000000	Gh 4	Least threatened	Grassland Biome	Dry Highveld Grassland Bioregion	Poorly protected
Besemkaree Koppies Shrubland	4.603600000000000	Gh 4	Least threatened	Grassland Biome	Dry Highveld Grassland Bioregion	Poorly protected
Besemkaree Koppies Shrubland	9.810300000000000	Gh 4	Least threatened	Grassland Biome	Dry Highveld Grassland Bioregion	Poorly protected
Besemkaree Koppies Shrubland	17.485900000000001	Gh 4	Least threatened	Grassland Biome	Dry Highveld Grassland Bioregion	Poorly protected
Besemkaree Koppies Shrubland	8.017600000000000	Gh 4	Least threatened	Grassland Biome	Dry Highveld Grassland Bioregion	Poorly protected
Besemkaree Koppies Shrubland	1.127600000000000	Gh 4	Least threatened	Grassland Biome	Dry Highveld Grassland Bioregion	Poorly protected
Besemkaree Koppies Shrubland	22.541499999999999	Gh 4	Least threatened	Grassland Biome	Dry Highveld Grassland Bioregion	Poorly protected
Besemkaree Koppies Shrubland	8.267600000000000	Gh 4	Least threatened	Grassland Biome	Dry Highveld Grassland Bioregion	Poorly protected
Besemkaree Koppies Shrubland	7.131300000000000	Gh 4	Least threatened	Grassland Biome	Dry Highveld Grassland Bioregion	Poorly protected
Besemkaree Koppies Shrubland	7.151800000000000	Gh 4	Least threatened	Grassland Biome	Dry Highveld Grassland Bioregion	Poorly protected
Besemkaree Koppies Shrubland	11.305600000000000	Gh 4	Least threatened	Grassland Biome	Dry Highveld Grassland Bioregion	Poorly protected
Besemkaree Koppies Shrubland	20.943300000000001	Gh 4	Least threatened	Grassland Biome	Dry Highveld Grassland Bioregion	Poorly protected
Besemkaree Koppies Shrubland	2.811100000000000	Gh 4	Least threatened	Grassland Biome	Dry Highveld Grassland Bioregion	Poorly protected
Besemkaree Koppies Shrubland	1.888000000000000	Gh 4	Least threatened	Grassland Biome	Dry Highveld Grassland Bioregion	Poorly protected
Besemkaree Koppies Shrubland	1.300600000000000	Gh 4	Least threatened	Grassland Biome	Dry Highveld Grassland Bioregion	Poorly protected
Besemkaree Koppies Shrubland	268.937599999999975	Gh 4	Least threatened	Grassland Biome	Dry Highveld Grassland Bioregion	Poorly protected
Besemkaree Koppies Shrubland	59.017099999999999	Gh 4	Least threatened	Grassland Biome	Dry Highveld Grassland Bioregion	Poorly protected
Besemkaree Koppies Shrubland	0.516500000000000	Gh 4	Least threatened	Grassland Biome	Dry Highveld Grassland Bioregion	Poorly protected
Besemkaree Koppies Shrubland	0.642800000000000	Gh 4	Least threatened	Grassland Biome	Dry Highveld Grassland Bioregion	Poorly protected
Besemkaree Koppies Shrubland	2.900700000000000	Gh 4	Least threatened	Grassland Biome	Dry Highveld Grassland Bioregion	Poorly protected
Besemkaree Koppies Shrubland	7.130400000000000	Gh 4	Least threatened	Grassland Biome	Dry Highveld Grassland Bioregion	Poorly protected
Besemkaree Koppies Shrubland	3.488900000000000	Gh 4	Least threatened	Grassland Biome	Dry Highveld Grassland Bioregion	Poorly protected
Bhisho Thornveld	124.917100000000005	SVs 7	Least threatened	Savanna Biome	Sub-Escarpment Savanna Bioregion	Hardly protected
Bhisho Thornveld	40.861899999999999	SVs 7	Least threatened	Savanna Biome	Sub-Escarpment Savanna Bioregion	Hardly protected
Bhisho Thornveld	1326.124700000000075	SVs 7	Least threatened	Savanna Biome	Sub-Escarpment Savanna Bioregion	Hardly protected
Bhisho Thornveld	43.748899999999999	SVs 7	Least threatened	Savanna Biome	Sub-Escarpment Savanna Bioregion	Hardly protected
Bhisho Thornveld	1.068000000000000	SVs 7	Least threatened	Savanna Biome	Sub-Escarpment Savanna Bioregion	Hardly protected
Bhisho Thornveld	0.735400000000000	SVs 7	Least threatened	Savanna Biome	Sub-Escarpment Savanna Bioregion	Hardly protected
Bhisho Thornveld	2.809100000000000	SVs 7	Least threatened	Savanna Biome	Sub-Escarpment Savanna Bioregion	Hardly protected
Bhisho Thornveld	0.330000000000000	SVs 7	Least threatened	Savanna Biome	Sub-Escarpment Savanna Bioregion	Hardly protected
Bhisho Thornveld	6.756100000000000	SVs 7	Least threatened	Savanna Biome	Sub-Escarpment Savanna Bioregion	Hardly protected
Bhisho Thornveld	32.502000000000002	SVs 7	Least threatened	Savanna Biome	Sub-Escarpment Savanna Bioregion	Hardly protected
Bhisho Thornveld	4.628000000000000	SVs 7	Least threatened	Savanna Biome	Sub-Escarpment Savanna Bioregion	Hardly protected
Bhisho Thornveld	0.588600000000000	SVs 7	Least threatened	Savanna Biome	Sub-Escarpment Savanna Bioregion	Hardly protected
Bhisho Thornveld	0.050900000000000	SVs 7	Least threatened	Savanna Biome	Sub-Escarpment Savanna Bioregion	Hardly protected
Bhisho Thornveld	0.431600000000000	SVs 7	Least threatened	Savanna Biome	Sub-Escarpment Savanna Bioregion	Hardly protected
Bhisho Thornveld	2.611200000000000	SVs 7	Least threatened	Savanna Biome	Sub-Escarpment Savanna Bioregion	Hardly protected
Bhisho Thornveld	0.162300000000000	SVs 7	Least threatened	Savanna Biome	Sub-Escarpment Savanna Bioregion	Hardly protected
Bhisho Thornveld	0.462300000000000	SVs 7	Least threatened	Savanna Biome	Sub-Escarpment Savanna Bioregion	Hardly protected
Bhisho Thornveld	0.872100000000000	SVs 7	Least threatened	Savanna Biome	Sub-Escarpment Savanna Bioregion	Hardly protected
Bhisho Thornveld	0.843100000000000	SVs 7	Least threatened	Savanna Biome	Sub-Escarpment Savanna Bioregion	Hardly protected
Bhisho Thornveld	2.505800000000000	SVs 7	Least threatened	Savanna Biome	Sub-Escarpment Savanna Bioregion	Hardly protected
Bhisho Thornveld	1570.104299999999967	SVs 7	Least threatened	Savanna Biome	Sub-Escarpment Savanna Bioregion	Hardly protected
Bhisho Thornveld	0.244500000000000	SVs 7	Least threatened	Savanna Biome	Sub-Escarpment Savanna Bioregion	Hardly protected
Bhisho Thornveld	0.073500000000000	SVs 7	Least threatened	Savanna Biome	Sub-Escarpment Savanna Bioregion	Hardly protected
Bhisho Thornveld	66.319900000000004	SVs 7	Least threatened	Savanna Biome	Sub-Escarpment Savanna Bioregion	Hardly protected
Bhisho Thornveld	19.597899999999999	SVs 7	Least threatened	Savanna Biome	Sub-Escarpment Savanna Bioregion	Hardly protected
Bhisho Thornveld	25.346299999999999	SVs 7	Least threatened	Savanna Biome	Sub-Escarpment Savanna Bioregion	Hardly protected
Bhisho Thornveld	30.546600000000002	SVs 7	Least threatened	Savanna Biome	Sub-Escarpment Savanna Bioregion	Hardly protected
Bhisho Thornveld	130.488400000000013	SVs 7	Least threatened	Savanna Biome	Sub-Escarpment Savanna Bioregion	Hardly protected
Bhisho Thornveld	38.052300000000002	SVs 7	Least threatened	Savanna Biome	Sub-Escarpment Savanna Bioregion	Hardly protected
Bhisho Thornveld	221.005200000000002	SVs 7	Least threatened	Savanna Biome	Sub-Escarpment Savanna Bioregion	Hardly protected
Bhisho Thornveld	60.417400000000001	SVs 7	Least threatened	Savanna Biome	Sub-Escarpment Savanna Bioregion	Hardly protected
Bhisho Thornveld	0.282700000000000	SVs 7	Least threatened	Savanna Biome	Sub-Escarpment Savanna Bioregion	Hardly protected
Bhisho Thornveld	0.157700000000000	SVs 7	Least threatened	Savanna Biome	Sub-Escarpment Savanna Bioregion	Hardly protected
Bhisho Thornveld	18.530300000000000	SVs 7	Least threatened	Savanna Biome	Sub-Escarpment Savanna Bioregion	Hardly protected
Bhisho Thornveld	2967.815399999999954	SVs 7	Least threatened	Savanna Biome	Sub-Escarpment Savanna Bioregion	Hardly protected
Bhisho Thornveld	24.783300000000001	SVs 7	Least threatened	Savanna Biome	Sub-Escarpment Savanna Bioregion	Hardly protected
Bhisho Thornveld	6.351700000000000	SVs 7	Least threatened	Savanna Biome	Sub-Escarpment Savanna Bioregion	Hardly protected
Bhisho Thornveld	10.394200000000000	SVs 7	Least threatened	Savanna Biome	Sub-Escarpment Savanna Bioregion	Hardly protected
Bhisho Thornveld	0.105300000000000	SVs 7	Least threatened	Savanna Biome	Sub-Escarpment Savanna Bioregion	Hardly protected
Bhisho Thornveld	17.398900000000001	SVs 7	Least threatened	Savanna Biome	Sub-Escarpment Savanna Bioregion	Hardly protected
Bhisho Thornveld	2.033000000000000	SVs 7	Least threatened	Savanna Biome	Sub-Escarpment Savanna Bioregion	Hardly protected
Bhisho Thornveld	2.044300000000000	SVs 7	Least threatened	Savanna Biome	Sub-Escarpment Savanna Bioregion	Hardly protected
Bhisho Thornveld	23.006699999999999	SVs 7	Least threatened	Savanna Biome	Sub-Escarpment Savanna Bioregion	Hardly protected
Bhisho Thornveld	1.826400000000000	SVs 7	Least threatened	Savanna Biome	Sub-Escarpment Savanna Bioregion	Hardly protected
Bhisho Thornveld	6.191000000000000	SVs 7	Least threatened	Savanna Biome	Sub-Escarpment Savanna Bioregion	Hardly protected
Bhisho Thornveld	0.252400000000000	SVs 7	Least threatened	Savanna Biome	Sub-Escarpment Savanna Bioregion	Hardly protected
Bhisho Thornveld	0.164500000000000	SVs 7	Least threatened	Savanna Biome	Sub-Escarpment Savanna Bioregion	Hardly protected
Bhisho Thornveld	5.050300000000000	SVs 7	Least threatened	Savanna Biome	Sub-Escarpment Savanna Bioregion	Hardly protected
Bhisho Thornveld	1.455100000000000	SVs 7	Least threatened	Savanna Biome	Sub-Escarpment Savanna Bioregion	Hardly protected
Bhisho Thornveld	26.594400000000000	SVs 7	Least threatened	Savanna Biome	Sub-Escarpment Savanna Bioregion	Hardly protected
Bhisho Thornveld	0.779400000000000	SVs 7	Least threatened	Savanna Biome	Sub-Escarpment Savanna Bioregion	Hardly protected
Bhisho Thornveld	0.166600000000000	SVs 7	Least threatened	Savanna Biome	Sub-Escarpment Savanna Bioregion	Hardly protected
Bhisho Thornveld	0.254400000000000	SVs 7	Least threatened	Savanna Biome	Sub-Escarpment Savanna Bioregion	Hardly protected
Bhisho Thornveld	3.205100000000000	SVs 7	Least threatened	Savanna Biome	Sub-Escarpment Savanna Bioregion	Hardly protected
Bhisho Thornveld	4.465900000000000	SVs 7	Least threatened	Savanna Biome	Sub-Escarpment Savanna Bioregion	Hardly protected
Bhisho Thornveld	2.934600000000000	SVs 7	Least threatened	Savanna Biome	Sub-Escarpment Savanna Bioregion	Hardly protected
Bhisho Thornveld	0.415500000000000	SVs 7	Least threatened	Savanna Biome	Sub-Escarpment Savanna Bioregion	Hardly protected
Bhisho Thornveld	0.127200000000000	SVs 7	Least threatened	Savanna Biome	Sub-Escarpment Savanna Bioregion	Hardly protected
Bhisho Thornveld	0.424700000000000	SVs 7	Least threatened	Savanna Biome	Sub-Escarpment Savanna Bioregion	Hardly protected
Bhisho Thornveld	2.039700000000000	SVs 7	Least threatened	Savanna Biome	Sub-Escarpment Savanna Bioregion	Hardly protected
Bhisho Thornveld	0.696400000000000	SVs 7	Least threatened	Savanna Biome	Sub-Escarpment Savanna Bioregion	Hardly protected
Bhisho Thornveld	2.316200000000000	SVs 7	Least threatened	Savanna Biome	Sub-Escarpment Savanna Bioregion	Hardly protected
Bhisho Thornveld	0.175000000000000	SVs 7	Least threatened	Savanna Biome	Sub-Escarpment Savanna Bioregion	Hardly protected
Bhisho Thornveld	0.655000000000000	SVs 7	Least threatened	Savanna Biome	Sub-Escarpment Savanna Bioregion	Hardly protected
Bhisho Thornveld	0.072600000000000	SVs 7	Least threatened	Savanna Biome	Sub-Escarpment Savanna Bioregion	Hardly protected
Bhisho Thornveld	0.991800000000000	SVs 7	Least threatened	Savanna Biome	Sub-Escarpment Savanna Bioregion	Hardly protected
Bhisho Thornveld	0.359700000000000	SVs 7	Least threatened	Savanna Biome	Sub-Escarpment Savanna Bioregion	Hardly protected
Bhisho Thornveld	6.384000000000000	SVs 7	Least threatened	Savanna Biome	Sub-Escarpment Savanna Bioregion	Hardly protected
Bhisho Thornveld	2.230400000000000	SVs 7	Least threatened	Savanna Biome	Sub-Escarpment Savanna Bioregion	Hardly protected
Bhisho Thornveld	0.491400000000000	SVs 7	Least threatened	Savanna Biome	Sub-Escarpment Savanna Bioregion	Hardly protected
Bhisho Thornveld	0.498900000000000	SVs 7	Least threatened	Savanna Biome	Sub-Escarpment Savanna Bioregion	Hardly protected
Bhisho Thornveld	2.479500000000000	SVs 7	Least threatened	Savanna Biome	Sub-Escarpment Savanna Bioregion	Hardly protected
Bhisho Thornveld	61.044100000000000	SVs 7	Least threatened	Savanna Biome	Sub-Escarpment Savanna Bioregion	Hardly protected
Bhisho Thornveld	2.883300000000000	SVs 7	Least threatened	Savanna Biome	Sub-Escarpment Savanna Bioregion	Hardly protected
Bhisho Thornveld	0.192700000000000	SVs 7	Least threatened	Savanna Biome	Sub-Escarpment Savanna Bioregion	Hardly protected
Bhisho Thornveld	0.135300000000000	SVs 7	Least threatened	Savanna Biome	Sub-Escarpment Savanna Bioregion	Hardly protected
Bhisho Thornveld	0.136600000000000	SVs 7	Least threatened	Savanna Biome	Sub-Escarpment Savanna Bioregion	Hardly protected
Bhisho Thornveld	0.094100000000000	SVs 7	Least threatened	Savanna Biome	Sub-Escarpment Savanna Bioregion	Hardly protected
Bhisho Thornveld	0.634300000000000	SVs 7	Least threatened	Savanna Biome	Sub-Escarpment Savanna Bioregion	Hardly protected
Bhisho Thornveld	2.347000000000000	SVs 7	Least threatened	Savanna Biome	Sub-Escarpment Savanna Bioregion	Hardly protected
Bhisho Thornveld	1.495300000000000	SVs 7	Least threatened	Savanna Biome	Sub-Escarpment Savanna Bioregion	Hardly protected
Bhisho Thornveld	0.411600000000000	SVs 7	Least threatened	Savanna Biome	Sub-Escarpment Savanna Bioregion	Hardly protected
Bhisho Thornveld	0.133700000000000	SVs 7	Least threatened	Savanna Biome	Sub-Escarpment Savanna Bioregion	Hardly protected
Bhisho Thornveld	3.419900000000000	SVs 7	Least threatened	Savanna Biome	Sub-Escarpment Savanna Bioregion	Hardly protected
Bhisho Thornveld	0.311800000000000	SVs 7	Least threatened	Savanna Biome	Sub-Escarpment Savanna Bioregion	Hardly protected
Bhisho Thornveld	0.108600000000000	SVs 7	Least threatened	Savanna Biome	Sub-Escarpment Savanna Bioregion	Hardly protected
Bhisho Thornveld	0.290400000000000	SVs 7	Least threatened	Savanna Biome	Sub-Escarpment Savanna Bioregion	Hardly protected
Bhisho Thornveld	0.475900000000000	SVs 7	Least threatened	Savanna Biome	Sub-Escarpment Savanna Bioregion	Hardly protected
Bhisho Thornveld	0.881500000000000	SVs 7	Least threatened	Savanna Biome	Sub-Escarpment Savanna Bioregion	Hardly protected
Bhisho Thornveld	0.765100000000000	SVs 7	Least threatened	Savanna Biome	Sub-Escarpment Savanna Bioregion	Hardly protected
Bhisho Thornveld	42.374600000000001	SVs 7	Least threatened	Savanna Biome	Sub-Escarpment Savanna Bioregion	Hardly protected
Bhisho Thornveld	11.367500000000000	SVs 7	Least threatened	Savanna Biome	Sub-Escarpment Savanna Bioregion	Hardly protected
Bhisho Thornveld	12.295100000000000	SVs 7	Least threatened	Savanna Biome	Sub-Escarpment Savanna Bioregion	Hardly protected
Bhisho Thornveld	293.540000000000020	SVs 7	Least threatened	Savanna Biome	Sub-Escarpment Savanna Bioregion	Hardly protected
Bhisho Thornveld	83.658699999999996	SVs 7	Least threatened	Savanna Biome	Sub-Escarpment Savanna Bioregion	Hardly protected
Bhisho Thornveld	0.716800000000000	SVs 7	Least threatened	Savanna Biome	Sub-Escarpment Savanna Bioregion	Hardly protected
Bhisho Thornveld	1.496300000000000	SVs 7	Least threatened	Savanna Biome	Sub-Escarpment Savanna Bioregion	Hardly protected
Bhisho Thornveld	0.151900000000000	SVs 7	Least threatened	Savanna Biome	Sub-Escarpment Savanna Bioregion	Hardly protected
Bhisho Thornveld	4.263200000000000	SVs 7	Least threatened	Savanna Biome	Sub-Escarpment Savanna Bioregion	Hardly protected
Bhisho Thornveld	5.066200000000000	SVs 7	Least threatened	Savanna Biome	Sub-Escarpment Savanna Bioregion	Hardly protected
Bhisho Thornveld	17.043099999999999	SVs 7	Least threatened	Savanna Biome	Sub-Escarpment Savanna Bioregion	Hardly protected
Bhisho Thornveld	202.048699999999997	SVs 7	Least threatened	Savanna Biome	Sub-Escarpment Savanna Bioregion	Hardly protected
Bhisho Thornveld	0.874600000000000	SVs 7	Least threatened	Savanna Biome	Sub-Escarpment Savanna Bioregion	Hardly protected
Bhisho Thornveld	1.582000000000000	SVs 7	Least threatened	Savanna Biome	Sub-Escarpment Savanna Bioregion	Hardly protected
Bhisho Thornveld	0.478200000000000	SVs 7	Least threatened	Savanna Biome	Sub-Escarpment Savanna Bioregion	Hardly protected
Bhisho Thornveld	341.961000000000013	SVs 7	Least threatened	Savanna Biome	Sub-Escarpment Savanna Bioregion	Hardly protected
Bhisho Thornveld	0.351300000000000	SVs 7	Least threatened	Savanna Biome	Sub-Escarpment Savanna Bioregion	Hardly protected
Bhisho Thornveld	2.583700000000000	SVs 7	Least threatened	Savanna Biome	Sub-Escarpment Savanna Bioregion	Hardly protected
Bhisho Thornveld	0.948200000000000	SVs 7	Least threatened	Savanna Biome	Sub-Escarpment Savanna Bioregion	Hardly protected
Bhisho Thornveld	0.616300000000000	SVs 7	Least threatened	Savanna Biome	Sub-Escarpment Savanna Bioregion	Hardly protected
Bhisho Thornveld	1.398500000000000	SVs 7	Least threatened	Savanna Biome	Sub-Escarpment Savanna Bioregion	Hardly protected
Bhisho Thornveld	1.049300000000000	SVs 7	Least threatened	Savanna Biome	Sub-Escarpment Savanna Bioregion	Hardly protected
Bhisho Thornveld	2.129400000000000	SVs 7	Least threatened	Savanna Biome	Sub-Escarpment Savanna Bioregion	Hardly protected
Bhisho Thornveld	0.203800000000000	SVs 7	Least threatened	Savanna Biome	Sub-Escarpment Savanna Bioregion	Hardly protected
Bhisho Thornveld	0.206500000000000	SVs 7	Least threatened	Savanna Biome	Sub-Escarpment Savanna Bioregion	Hardly protected
Bloemfontein Dry Grassland	4729.659099999999853	Gh 5	Endangered	Grassland Biome	Dry Highveld Grassland Bioregion	Hardly protected
Bloemfontein Dry Grassland	12.110300000000001	Gh 5	Endangered	Grassland Biome	Dry Highveld Grassland Bioregion	Hardly protected
Bloemfontein Dry Grassland	4.340600000000000	Gh 5	Endangered	Grassland Biome	Dry Highveld Grassland Bioregion	Hardly protected
Bloemfontein Dry Grassland	170.940300000000008	Gh 5	Endangered	Grassland Biome	Dry Highveld Grassland Bioregion	Hardly protected
Bloemfontein Karroid Shrubland	8.650000000000000	Gh 8	Least threatened	Grassland Biome	Dry Highveld Grassland Bioregion	Hardly protected
Bloemfontein Karroid Shrubland	0.484900000000000	Gh 8	Least threatened	Grassland Biome	Dry Highveld Grassland Bioregion	Hardly protected
Bloemfontein Karroid Shrubland	4.909900000000000	Gh 8	Least threatened	Grassland Biome	Dry Highveld Grassland Bioregion	Hardly protected
Bloemfontein Karroid Shrubland	0.504200000000000	Gh 8	Least threatened	Grassland Biome	Dry Highveld Grassland Bioregion	Hardly protected
Bloemfontein Karroid Shrubland	0.798000000000000	Gh 8	Least threatened	Grassland Biome	Dry Highveld Grassland Bioregion	Hardly protected
Bloemfontein Karroid Shrubland	1.475600000000000	Gh 8	Least threatened	Grassland Biome	Dry Highveld Grassland Bioregion	Hardly protected
Bloemfontein Karroid Shrubland	1.344000000000000	Gh 8	Least threatened	Grassland Biome	Dry Highveld Grassland Bioregion	Hardly protected
Bloemfontein Karroid Shrubland	0.494500000000000	Gh 8	Least threatened	Grassland Biome	Dry Highveld Grassland Bioregion	Hardly protected
Bloemfontein Karroid Shrubland	0.436200000000000	Gh 8	Least threatened	Grassland Biome	Dry Highveld Grassland Bioregion	Hardly protected
Bloemfontein Karroid Shrubland	0.242800000000000	Gh 8	Least threatened	Grassland Biome	Dry Highveld Grassland Bioregion	Hardly protected
Bloemfontein Karroid Shrubland	0.482100000000000	Gh 8	Least threatened	Grassland Biome	Dry Highveld Grassland Bioregion	Hardly protected
Bloemfontein Karroid Shrubland	3.171200000000000	Gh 8	Least threatened	Grassland Biome	Dry Highveld Grassland Bioregion	Hardly protected
Bloemfontein Karroid Shrubland	0.212100000000000	Gh 8	Least threatened	Grassland Biome	Dry Highveld Grassland Bioregion	Hardly protected
Bloemfontein Karroid Shrubland	0.452900000000000	Gh 8	Least threatened	Grassland Biome	Dry Highveld Grassland Bioregion	Hardly protected
Bloemfontein Karroid Shrubland	2.826000000000000	Gh 8	Least threatened	Grassland Biome	Dry Highveld Grassland Bioregion	Hardly protected
Bloemfontein Karroid Shrubland	2.868500000000000	Gh 8	Least threatened	Grassland Biome	Dry Highveld Grassland Bioregion	Hardly protected
Bloemfontein Karroid Shrubland	0.220500000000000	Gh 8	Least threatened	Grassland Biome	Dry Highveld Grassland Bioregion	Hardly protected
Bloemfontein Karroid Shrubland	0.397300000000000	Gh 8	Least threatened	Grassland Biome	Dry Highveld Grassland Bioregion	Hardly protected
Bloemfontein Karroid Shrubland	7.428800000000000	Gh 8	Least threatened	Grassland Biome	Dry Highveld Grassland Bioregion	Hardly protected
Bloemfontein Karroid Shrubland	1.926100000000000	Gh 8	Least threatened	Grassland Biome	Dry Highveld Grassland Bioregion	Hardly protected
Bloemfontein Karroid Shrubland	0.949900000000000	Gh 8	Least threatened	Grassland Biome	Dry Highveld Grassland Bioregion	Hardly protected
Bloemfontein Karroid Shrubland	2.001400000000000	Gh 8	Least threatened	Grassland Biome	Dry Highveld Grassland Bioregion	Hardly protected
Bloemfontein Karroid Shrubland	0.427100000000000	Gh 8	Least threatened	Grassland Biome	Dry Highveld Grassland Bioregion	Hardly protected
Bloemfontein Karroid Shrubland	0.226600000000000	Gh 8	Least threatened	Grassland Biome	Dry Highveld Grassland Bioregion	Hardly protected
Bloemfontein Karroid Shrubland	1.544400000000000	Gh 8	Least threatened	Grassland Biome	Dry Highveld Grassland Bioregion	Hardly protected
Bloemfontein Karroid Shrubland	0.515700000000000	Gh 8	Least threatened	Grassland Biome	Dry Highveld Grassland Bioregion	Hardly protected
Bloemfontein Karroid Shrubland	25.283600000000000	Gh 8	Least threatened	Grassland Biome	Dry Highveld Grassland Bioregion	Hardly protected
Bloemfontein Karroid Shrubland	0.336400000000000	Gh 8	Least threatened	Grassland Biome	Dry Highveld Grassland Bioregion	Hardly protected
Bloemfontein Karroid Shrubland	0.433900000000000	Gh 8	Least threatened	Grassland Biome	Dry Highveld Grassland Bioregion	Hardly protected
Bloemfontein Karroid Shrubland	5.074700000000000	Gh 8	Least threatened	Grassland Biome	Dry Highveld Grassland Bioregion	Hardly protected
Bloemfontein Karroid Shrubland	2.082800000000000	Gh 8	Least threatened	Grassland Biome	Dry Highveld Grassland Bioregion	Hardly protected
Bloemfontein Karroid Shrubland	0.817900000000000	Gh 8	Least threatened	Grassland Biome	Dry Highveld Grassland Bioregion	Hardly protected
Bloemfontein Karroid Shrubland	0.616300000000000	Gh 8	Least threatened	Grassland Biome	Dry Highveld Grassland Bioregion	Hardly protected
Bloemfontein Karroid Shrubland	1.152400000000000	Gh 8	Least threatened	Grassland Biome	Dry Highveld Grassland Bioregion	Hardly protected
Bloemfontein Karroid Shrubland	0.695600000000000	Gh 8	Least threatened	Grassland Biome	Dry Highveld Grassland Bioregion	Hardly protected
Bloemfontein Karroid Shrubland	0.348200000000000	Gh 8	Least threatened	Grassland Biome	Dry Highveld Grassland Bioregion	Hardly protected
Bloemfontein Karroid Shrubland	12.688300000000000	Gh 8	Least threatened	Grassland Biome	Dry Highveld Grassland Bioregion	Hardly protected
Blombos Strandveld	1.767800000000000	FS 8	Least threatened	Fynbos Biome	South Strandveld Bioregion	Moderately protected
Blombos Strandveld	21.112100000000002	FS 8	Least threatened	Fynbos Biome	South Strandveld Bioregion	Moderately protected
Blombos Strandveld	8.493200000000000	FS 8	Least threatened	Fynbos Biome	South Strandveld Bioregion	Moderately protected
Blombos Strandveld	10.536199999999999	FS 8	Least threatened	Fynbos Biome	South Strandveld Bioregion	Moderately protected
Blombos Strandveld	0.153900000000000	FS 8	Least threatened	Fynbos Biome	South Strandveld Bioregion	Moderately protected
Blombos Strandveld	0.111000000000000	FS 8	Least threatened	Fynbos Biome	South Strandveld Bioregion	Moderately protected
Blombos Strandveld	0.053700000000000	FS 8	Least threatened	Fynbos Biome	South Strandveld Bioregion	Moderately protected
Blombos Strandveld	0.310700000000000	FS 8	Least threatened	Fynbos Biome	South Strandveld Bioregion	Moderately protected
Blombos Strandveld	0.101900000000000	FS 8	Least threatened	Fynbos Biome	South Strandveld Bioregion	Moderately protected
Blombos Strandveld	0.197500000000000	FS 8	Least threatened	Fynbos Biome	South Strandveld Bioregion	Moderately protected
Blombos Strandveld	17.272300000000001	FS 8	Least threatened	Fynbos Biome	South Strandveld Bioregion	Moderately protected
Blouputs Karroid Thornveld	183.191699999999997	NKb 2	Least threatened	Nama-Karoo Biome	Bushmanland Bioregion	Well protected
Blouputs Karroid Thornveld	424.427200000000028	NKb 2	Least threatened	Nama-Karoo Biome	Bushmanland Bioregion	Well protected
Bokkeveld Sandstone Fynbos	1264.797100000000000	FFs 1	Least threatened	Fynbos Biome	Northwest Fynbos Bioregion	Poorly protected
Bokkeveld Sandstone Fynbos	5.759700000000000	FFs 1	Least threatened	Fynbos Biome	Northwest Fynbos Bioregion	Poorly protected
Bokkeveld Sandstone Fynbos	32.169800000000002	FFs 1	Least threatened	Fynbos Biome	Northwest Fynbos Bioregion	Poorly protected
Bokkeveld Sandstone Fynbos	22.938400000000001	FFs 1	Least threatened	Fynbos Biome	Northwest Fynbos Bioregion	Poorly protected
Bokkeveld Sandstone Fynbos	0.950600000000000	FFs 1	Least threatened	Fynbos Biome	Northwest Fynbos Bioregion	Poorly protected
Bokkeveld Sandstone Fynbos	22.242300000000000	FFs 1	Least threatened	Fynbos Biome	Northwest Fynbos Bioregion	Poorly protected
Bokkeveld Sandstone Fynbos	0.730300000000000	FFs 1	Least threatened	Fynbos Biome	Northwest Fynbos Bioregion	Poorly protected
Bokkeveld Sandstone Fynbos	0.209800000000000	FFs 1	Least threatened	Fynbos Biome	Northwest Fynbos Bioregion	Poorly protected
Bokkeveld Sandstone Fynbos	0.729100000000000	FFs 1	Least threatened	Fynbos Biome	Northwest Fynbos Bioregion	Poorly protected
Bokkeveld Sandstone Fynbos	0.176500000000000	FFs 1	Least threatened	Fynbos Biome	Northwest Fynbos Bioregion	Poorly protected
Bokkeveld Sandstone Fynbos	0.144600000000000	FFs 1	Least threatened	Fynbos Biome	Northwest Fynbos Bioregion	Poorly protected
Bokkeveld Sandstone Fynbos	1.493600000000000	FFs 1	Least threatened	Fynbos Biome	Northwest Fynbos Bioregion	Poorly protected
Bokkeveld Sandstone Fynbos	0.850900000000000	FFs 1	Least threatened	Fynbos Biome	Northwest Fynbos Bioregion	Poorly protected
Bokkeveld Sandstone Fynbos	4.478800000000000	FFs 1	Least threatened	Fynbos Biome	Northwest Fynbos Bioregion	Poorly protected
Bokkeveld Sandstone Fynbos	1.026200000000000	FFs 1	Least threatened	Fynbos Biome	Northwest Fynbos Bioregion	Poorly protected
Bokkeveld Sandstone Fynbos	2.255900000000000	FFs 1	Least threatened	Fynbos Biome	Northwest Fynbos Bioregion	Poorly protected
Bokkeveld Sandstone Fynbos	0.351100000000000	FFs 1	Least threatened	Fynbos Biome	Northwest Fynbos Bioregion	Poorly protected
Boland Granite Fynbos	49.725299999999997	FFg 2	Endangered	Fynbos Biome	Southwest Fynbos Bioregion	Poorly protected
Boland Granite Fynbos	2.681100000000000	FFg 2	Endangered	Fynbos Biome	Southwest Fynbos Bioregion	Poorly protected
Boland Granite Fynbos	82.603600000000000	FFg 2	Endangered	Fynbos Biome	Southwest Fynbos Bioregion	Poorly protected
Boland Granite Fynbos	0.252100000000000	FFg 2	Endangered	Fynbos Biome	Southwest Fynbos Bioregion	Poorly protected
Boland Granite Fynbos	24.077800000000000	FFg 2	Endangered	Fynbos Biome	Southwest Fynbos Bioregion	Poorly protected
Boland Granite Fynbos	27.045500000000001	FFg 2	Endangered	Fynbos Biome	Southwest Fynbos Bioregion	Poorly protected
Boland Granite Fynbos	0.506600000000000	FFg 2	Endangered	Fynbos Biome	Southwest Fynbos Bioregion	Poorly protected
Boland Granite Fynbos	0.218600000000000	FFg 2	Endangered	Fynbos Biome	Southwest Fynbos Bioregion	Poorly protected
Boland Granite Fynbos	9.043300000000000	FFg 2	Endangered	Fynbos Biome	Southwest Fynbos Bioregion	Poorly protected
Boland Granite Fynbos	0.381800000000000	FFg 2	Endangered	Fynbos Biome	Southwest Fynbos Bioregion	Poorly protected
Boland Granite Fynbos	25.212599999999998	FFg 2	Endangered	Fynbos Biome	Southwest Fynbos Bioregion	Poorly protected
Boland Granite Fynbos	170.764499999999998	FFg 2	Endangered	Fynbos Biome	Southwest Fynbos Bioregion	Poorly protected
Boland Granite Fynbos	0.305500000000000	FFg 2	Endangered	Fynbos Biome	Southwest Fynbos Bioregion	Poorly protected
Boland Granite Fynbos	0.231400000000000	FFg 2	Endangered	Fynbos Biome	Southwest Fynbos Bioregion	Poorly protected
Boland Granite Fynbos	1.611100000000000	FFg 2	Endangered	Fynbos Biome	Southwest Fynbos Bioregion	Poorly protected
Boland Granite Fynbos	0.659500000000000	FFg 2	Endangered	Fynbos Biome	Southwest Fynbos Bioregion	Poorly protected
Boland Granite Fynbos	1.539900000000000	FFg 2	Endangered	Fynbos Biome	Southwest Fynbos Bioregion	Poorly protected
Boland Granite Fynbos	4.600800000000000	FFg 2	Endangered	Fynbos Biome	Southwest Fynbos Bioregion	Poorly protected
Boland Granite Fynbos	0.842800000000000	FFg 2	Endangered	Fynbos Biome	Southwest Fynbos Bioregion	Poorly protected
Boland Granite Fynbos	2.339400000000000	FFg 2	Endangered	Fynbos Biome	Southwest Fynbos Bioregion	Poorly protected
Boland Granite Fynbos	0.302800000000000	FFg 2	Endangered	Fynbos Biome	Southwest Fynbos Bioregion	Poorly protected
Boland Granite Fynbos	0.060400000000000	FFg 2	Endangered	Fynbos Biome	Southwest Fynbos Bioregion	Poorly protected
Boland Granite Fynbos	0.145900000000000	FFg 2	Endangered	Fynbos Biome	Southwest Fynbos Bioregion	Poorly protected
Boland Granite Fynbos	0.967200000000000	FFg 2	Endangered	Fynbos Biome	Southwest Fynbos Bioregion	Poorly protected
Boland Granite Fynbos	0.068600000000000	FFg 2	Endangered	Fynbos Biome	Southwest Fynbos Bioregion	Poorly protected
Boland Granite Fynbos	0.229800000000000	FFg 2	Endangered	Fynbos Biome	Southwest Fynbos Bioregion	Poorly protected
Boland Granite Fynbos	5.332800000000000	FFg 2	Endangered	Fynbos Biome	Southwest Fynbos Bioregion	Poorly protected
Boland Granite Fynbos	0.231400000000000	FFg 2	Endangered	Fynbos Biome	Southwest Fynbos Bioregion	Poorly protected
Boland Granite Fynbos	83.172300000000007	FFg 2	Endangered	Fynbos Biome	Southwest Fynbos Bioregion	Poorly protected
Boland Granite Fynbos	3.873700000000000	FFg 2	Endangered	Fynbos Biome	Southwest Fynbos Bioregion	Poorly protected
Breede Alluvium Fynbos	9.590700000000000	FFa 2	Endangered	Fynbos Biome	Southwest Fynbos Bioregion	Hardly protected
Breede Alluvium Fynbos	21.054400000000001	FFa 2	Endangered	Fynbos Biome	Southwest Fynbos Bioregion	Hardly protected
Breede Alluvium Fynbos	75.625299999999996	FFa 2	Endangered	Fynbos Biome	Southwest Fynbos Bioregion	Hardly protected
Breede Alluvium Fynbos	404.271700000000010	FFa 2	Endangered	Fynbos Biome	Southwest Fynbos Bioregion	Hardly protected
Breede Alluvium Renosterveld	167.330399999999997	FRa 1	Endangered	Fynbos Biome	East Coast Renosterveld Bioregion	Hardly protected
Breede Alluvium Renosterveld	224.177099999999996	FRa 1	Endangered	Fynbos Biome	East Coast Renosterveld Bioregion	Hardly protected
Breede Alluvium Renosterveld	69.281000000000006	FRa 1	Endangered	Fynbos Biome	East Coast Renosterveld Bioregion	Hardly protected
Breede Alluvium Renosterveld	2.061200000000000	FRa 1	Endangered	Fynbos Biome	East Coast Renosterveld Bioregion	Hardly protected
Breede Alluvium Renosterveld	0.090000000000000	FRa 1	Endangered	Fynbos Biome	East Coast Renosterveld Bioregion	Hardly protected
Breede Alluvium Renosterveld	0.087600000000000	FRa 1	Endangered	Fynbos Biome	East Coast Renosterveld Bioregion	Hardly protected
Breede Alluvium Renosterveld	14.208299999999999	FRa 1	Endangered	Fynbos Biome	East Coast Renosterveld Bioregion	Hardly protected
Breede Alluvium Renosterveld	0.223200000000000	FRa 1	Endangered	Fynbos Biome	East Coast Renosterveld Bioregion	Hardly protected
Breede Alluvium Renosterveld	0.126800000000000	FRa 1	Endangered	Fynbos Biome	East Coast Renosterveld Bioregion	Hardly protected
Breede Alluvium Renosterveld	20.270000000000000	FRa 1	Endangered	Fynbos Biome	East Coast Renosterveld Bioregion	Hardly protected
Breede Alluvium Renosterveld	0.185800000000000	FRa 1	Endangered	Fynbos Biome	East Coast Renosterveld Bioregion	Hardly protected
Breede Alluvium Renosterveld	0.295900000000000	FRa 1	Endangered	Fynbos Biome	East Coast Renosterveld Bioregion	Hardly protected
Breede Quartzite Fynbos	1.402100000000000	FFq 4	Least threatened	Fynbos Biome	Southwest Fynbos Bioregion	Hardly protected
Breede Quartzite Fynbos	1.325700000000000	FFq 4	Least threatened	Fynbos Biome	Southwest Fynbos Bioregion	Hardly protected
Breede Quartzite Fynbos	0.403600000000000	FFq 4	Least threatened	Fynbos Biome	Southwest Fynbos Bioregion	Hardly protected
Breede Quartzite Fynbos	0.481900000000000	FFq 4	Least threatened	Fynbos Biome	Southwest Fynbos Bioregion	Hardly protected
Breede Quartzite Fynbos	1.500300000000000	FFq 4	Least threatened	Fynbos Biome	Southwest Fynbos Bioregion	Hardly protected
Breede Quartzite Fynbos	2.553900000000000	FFq 4	Least threatened	Fynbos Biome	Southwest Fynbos Bioregion	Hardly protected
Breede Quartzite Fynbos	1.651800000000000	FFq 4	Least threatened	Fynbos Biome	Southwest Fynbos Bioregion	Hardly protected
Breede Quartzite Fynbos	5.187000000000000	FFq 4	Least threatened	Fynbos Biome	Southwest Fynbos Bioregion	Hardly protected
Breede Quartzite Fynbos	0.522800000000000	FFq 4	Least threatened	Fynbos Biome	Southwest Fynbos Bioregion	Hardly protected
Breede Quartzite Fynbos	0.297300000000000	FFq 4	Least threatened	Fynbos Biome	Southwest Fynbos Bioregion	Hardly protected
Breede Quartzite Fynbos	0.990100000000000	FFq 4	Least threatened	Fynbos Biome	Southwest Fynbos Bioregion	Hardly protected
Breede Quartzite Fynbos	1.616100000000000	FFq 4	Least threatened	Fynbos Biome	Southwest Fynbos Bioregion	Hardly protected
Breede Quartzite Fynbos	0.273100000000000	FFq 4	Least threatened	Fynbos Biome	Southwest Fynbos Bioregion	Hardly protected
Breede Quartzite Fynbos	0.521000000000000	FFq 4	Least threatened	Fynbos Biome	Southwest Fynbos Bioregion	Hardly protected
Breede Quartzite Fynbos	6.047800000000000	FFq 4	Least threatened	Fynbos Biome	Southwest Fynbos Bioregion	Hardly protected
Breede Quartzite Fynbos	0.183000000000000	FFq 4	Least threatened	Fynbos Biome	Southwest Fynbos Bioregion	Hardly protected
Breede Quartzite Fynbos	0.051600000000000	FFq 4	Least threatened	Fynbos Biome	Southwest Fynbos Bioregion	Hardly protected
Breede Quartzite Fynbos	1.676600000000000	FFq 4	Least threatened	Fynbos Biome	Southwest Fynbos Bioregion	Hardly protected
Breede Quartzite Fynbos	0.410700000000000	FFq 4	Least threatened	Fynbos Biome	Southwest Fynbos Bioregion	Hardly protected
Breede Quartzite Fynbos	0.680600000000000	FFq 4	Least threatened	Fynbos Biome	Southwest Fynbos Bioregion	Hardly protected
Breede Quartzite Fynbos	0.292000000000000	FFq 4	Least threatened	Fynbos Biome	Southwest Fynbos Bioregion	Hardly protected
Breede Quartzite Fynbos	3.573300000000000	FFq 4	Least threatened	Fynbos Biome	Southwest Fynbos Bioregion	Hardly protected
Breede Quartzite Fynbos	0.195500000000000	FFq 4	Least threatened	Fynbos Biome	Southwest Fynbos Bioregion	Hardly protected
Breede Quartzite Fynbos	1.160100000000000	FFq 4	Least threatened	Fynbos Biome	Southwest Fynbos Bioregion	Hardly protected
Breede Quartzite Fynbos	4.006800000000000	FFq 4	Least threatened	Fynbos Biome	Southwest Fynbos Bioregion	Hardly protected
Breede Quartzite Fynbos	0.845200000000000	FFq 4	Least threatened	Fynbos Biome	Southwest Fynbos Bioregion	Hardly protected
Breede Quartzite Fynbos	0.161500000000000	FFq 4	Least threatened	Fynbos Biome	Southwest Fynbos Bioregion	Hardly protected
Breede Quartzite Fynbos	0.060600000000000	FFq 4	Least threatened	Fynbos Biome	Southwest Fynbos Bioregion	Hardly protected
Breede Quartzite Fynbos	0.276100000000000	FFq 4	Least threatened	Fynbos Biome	Southwest Fynbos Bioregion	Hardly protected
Breede Quartzite Fynbos	0.386700000000000	FFq 4	Least threatened	Fynbos Biome	Southwest Fynbos Bioregion	Hardly protected
Breede Quartzite Fynbos	0.439000000000000	FFq 4	Least threatened	Fynbos Biome	Southwest Fynbos Bioregion	Hardly protected
Breede Quartzite Fynbos	0.120900000000000	FFq 4	Least threatened	Fynbos Biome	Southwest Fynbos Bioregion	Hardly protected
Breede Quartzite Fynbos	0.143800000000000	FFq 4	Least threatened	Fynbos Biome	Southwest Fynbos Bioregion	Hardly protected
Breede Quartzite Fynbos	3.067500000000000	FFq 4	Least threatened	Fynbos Biome	Southwest Fynbos Bioregion	Hardly protected
Breede Quartzite Fynbos	1.308200000000000	FFq 4	Least threatened	Fynbos Biome	Southwest Fynbos Bioregion	Hardly protected
Breede Quartzite Fynbos	0.629200000000000	FFq 4	Least threatened	Fynbos Biome	Southwest Fynbos Bioregion	Hardly protected
Breede Quartzite Fynbos	0.832900000000000	FFq 4	Least threatened	Fynbos Biome	Southwest Fynbos Bioregion	Hardly protected
Breede Quartzite Fynbos	0.056400000000000	FFq 4	Least threatened	Fynbos Biome	Southwest Fynbos Bioregion	Hardly protected
Breede Quartzite Fynbos	2.140600000000000	FFq 4	Least threatened	Fynbos Biome	Southwest Fynbos Bioregion	Hardly protected
Breede Quartzite Fynbos	1.405600000000000	FFq 4	Least threatened	Fynbos Biome	Southwest Fynbos Bioregion	Hardly protected
Breede Quartzite Fynbos	0.199800000000000	FFq 4	Least threatened	Fynbos Biome	Southwest Fynbos Bioregion	Hardly protected
Breede Quartzite Fynbos	2.301900000000000	FFq 4	Least threatened	Fynbos Biome	Southwest Fynbos Bioregion	Hardly protected
Breede Quartzite Fynbos	6.147500000000000	FFq 4	Least threatened	Fynbos Biome	Southwest Fynbos Bioregion	Hardly protected
Breede Quartzite Fynbos	0.268900000000000	FFq 4	Least threatened	Fynbos Biome	Southwest Fynbos Bioregion	Hardly protected
Breede Quartzite Fynbos	0.995500000000000	FFq 4	Least threatened	Fynbos Biome	Southwest Fynbos Bioregion	Hardly protected
Breede Quartzite Fynbos	0.605600000000000	FFq 4	Least threatened	Fynbos Biome	Southwest Fynbos Bioregion	Hardly protected
Breede Quartzite Fynbos	0.520900000000000	FFq 4	Least threatened	Fynbos Biome	Southwest Fynbos Bioregion	Hardly protected
Breede Quartzite Fynbos	0.201300000000000	FFq 4	Least threatened	Fynbos Biome	Southwest Fynbos Bioregion	Hardly protected
Breede Quartzite Fynbos	5.351500000000000	FFq 4	Least threatened	Fynbos Biome	Southwest Fynbos Bioregion	Hardly protected
Breede Quartzite Fynbos	0.054500000000000	FFq 4	Least threatened	Fynbos Biome	Southwest Fynbos Bioregion	Hardly protected
Breede Quartzite Fynbos	9.821199999999999	FFq 4	Least threatened	Fynbos Biome	Southwest Fynbos Bioregion	Hardly protected
Breede Quartzite Fynbos	0.416500000000000	FFq 4	Least threatened	Fynbos Biome	Southwest Fynbos Bioregion	Hardly protected
Breede Quartzite Fynbos	0.073700000000000	FFq 4	Least threatened	Fynbos Biome	Southwest Fynbos Bioregion	Hardly protected
Breede Quartzite Fynbos	0.173000000000000	FFq 4	Least threatened	Fynbos Biome	Southwest Fynbos Bioregion	Hardly protected
Breede Quartzite Fynbos	0.937500000000000	FFq 4	Least threatened	Fynbos Biome	Southwest Fynbos Bioregion	Hardly protected
Breede Quartzite Fynbos	0.052400000000000	FFq 4	Least threatened	Fynbos Biome	Southwest Fynbos Bioregion	Hardly protected
Breede Quartzite Fynbos	4.616900000000000	FFq 4	Least threatened	Fynbos Biome	Southwest Fynbos Bioregion	Hardly protected
Breede Quartzite Fynbos	0.123500000000000	FFq 4	Least threatened	Fynbos Biome	Southwest Fynbos Bioregion	Hardly protected
Breede Quartzite Fynbos	0.054200000000000	FFq 4	Least threatened	Fynbos Biome	Southwest Fynbos Bioregion	Hardly protected
Breede Quartzite Fynbos	0.070100000000000	FFq 4	Least threatened	Fynbos Biome	Southwest Fynbos Bioregion	Hardly protected
Breede Quartzite Fynbos	0.608500000000000	FFq 4	Least threatened	Fynbos Biome	Southwest Fynbos Bioregion	Hardly protected
Breede Quartzite Fynbos	0.655500000000000	FFq 4	Least threatened	Fynbos Biome	Southwest Fynbos Bioregion	Hardly protected
Breede Quartzite Fynbos	3.455700000000000	FFq 4	Least threatened	Fynbos Biome	Southwest Fynbos Bioregion	Hardly protected
Breede Quartzite Fynbos	1.588800000000000	FFq 4	Least threatened	Fynbos Biome	Southwest Fynbos Bioregion	Hardly protected
Breede Quartzite Fynbos	0.836200000000000	FFq 4	Least threatened	Fynbos Biome	Southwest Fynbos Bioregion	Hardly protected
Breede Quartzite Fynbos	4.363500000000000	FFq 4	Least threatened	Fynbos Biome	Southwest Fynbos Bioregion	Hardly protected
Breede Quartzite Fynbos	2.706900000000000	FFq 4	Least threatened	Fynbos Biome	Southwest Fynbos Bioregion	Hardly protected
Breede Quartzite Fynbos	0.128200000000000	FFq 4	Least threatened	Fynbos Biome	Southwest Fynbos Bioregion	Hardly protected
Breede Quartzite Fynbos	0.462800000000000	FFq 4	Least threatened	Fynbos Biome	Southwest Fynbos Bioregion	Hardly protected
Breede Quartzite Fynbos	1.017500000000000	FFq 4	Least threatened	Fynbos Biome	Southwest Fynbos Bioregion	Hardly protected
Breede Quartzite Fynbos	0.051900000000000	FFq 4	Least threatened	Fynbos Biome	Southwest Fynbos Bioregion	Hardly protected
Breede Quartzite Fynbos	0.135300000000000	FFq 4	Least threatened	Fynbos Biome	Southwest Fynbos Bioregion	Hardly protected
Breede Quartzite Fynbos	0.269100000000000	FFq 4	Least threatened	Fynbos Biome	Southwest Fynbos Bioregion	Hardly protected
Breede Sand Fynbos	67.421400000000006	FFd 8	Vulnerable	Fynbos Biome	Southwest Fynbos Bioregion	Not protected
Breede Sand Fynbos	0.393600000000000	FFd 8	Vulnerable	Fynbos Biome	Southwest Fynbos Bioregion	Not protected
Breede Sand Fynbos	1.055000000000000	FFd 8	Vulnerable	Fynbos Biome	Southwest Fynbos Bioregion	Not protected
Breede Sand Fynbos	0.734500000000000	FFd 8	Vulnerable	Fynbos Biome	Southwest Fynbos Bioregion	Not protected
Breede Sand Fynbos	3.333300000000000	FFd 8	Vulnerable	Fynbos Biome	Southwest Fynbos Bioregion	Not protected
Breede Sand Fynbos	2.794600000000000	FFd 8	Vulnerable	Fynbos Biome	Southwest Fynbos Bioregion	Not protected
Breede Sand Fynbos	2.912600000000000	FFd 8	Vulnerable	Fynbos Biome	Southwest Fynbos Bioregion	Not protected
Breede Sand Fynbos	7.163200000000000	FFd 8	Vulnerable	Fynbos Biome	Southwest Fynbos Bioregion	Not protected
Breede Sand Fynbos	5.973100000000000	FFd 8	Vulnerable	Fynbos Biome	Southwest Fynbos Bioregion	Not protected
Breede Sand Fynbos	0.996000000000000	FFd 8	Vulnerable	Fynbos Biome	Southwest Fynbos Bioregion	Not protected
Breede Shale Fynbos	119.248099999999994	FFh 4	Vulnerable	Fynbos Biome	Southwest Fynbos Bioregion	Poorly protected
Breede Shale Fynbos	78.476500000000001	FFh 4	Vulnerable	Fynbos Biome	Southwest Fynbos Bioregion	Poorly protected
Breede Shale Fynbos	0.382000000000000	FFh 4	Vulnerable	Fynbos Biome	Southwest Fynbos Bioregion	Poorly protected
Breede Shale Fynbos	0.903300000000000	FFh 4	Vulnerable	Fynbos Biome	Southwest Fynbos Bioregion	Poorly protected
Breede Shale Fynbos	4.981600000000000	FFh 4	Vulnerable	Fynbos Biome	Southwest Fynbos Bioregion	Poorly protected
Breede Shale Fynbos	4.173600000000000	FFh 4	Vulnerable	Fynbos Biome	Southwest Fynbos Bioregion	Poorly protected
Breede Shale Fynbos	0.394200000000000	FFh 4	Vulnerable	Fynbos Biome	Southwest Fynbos Bioregion	Poorly protected
Breede Shale Fynbos	1.731000000000000	FFh 4	Vulnerable	Fynbos Biome	Southwest Fynbos Bioregion	Poorly protected
Breede Shale Fynbos	6.934400000000000	FFh 4	Vulnerable	Fynbos Biome	Southwest Fynbos Bioregion	Poorly protected
Breede Shale Fynbos	0.618900000000000	FFh 4	Vulnerable	Fynbos Biome	Southwest Fynbos Bioregion	Poorly protected
Breede Shale Fynbos	0.213700000000000	FFh 4	Vulnerable	Fynbos Biome	Southwest Fynbos Bioregion	Poorly protected
Breede Shale Fynbos	0.288500000000000	FFh 4	Vulnerable	Fynbos Biome	Southwest Fynbos Bioregion	Poorly protected
Breede Shale Fynbos	2.681300000000000	FFh 4	Vulnerable	Fynbos Biome	Southwest Fynbos Bioregion	Poorly protected
Breede Shale Fynbos	0.779900000000000	FFh 4	Vulnerable	Fynbos Biome	Southwest Fynbos Bioregion	Poorly protected
Breede Shale Fynbos	0.324100000000000	FFh 4	Vulnerable	Fynbos Biome	Southwest Fynbos Bioregion	Poorly protected
Breede Shale Fynbos	15.597600000000000	FFh 4	Vulnerable	Fynbos Biome	Southwest Fynbos Bioregion	Poorly protected
Breede Shale Fynbos	0.358900000000000	FFh 4	Vulnerable	Fynbos Biome	Southwest Fynbos Bioregion	Poorly protected
Breede Shale Fynbos	0.072700000000000	FFh 4	Vulnerable	Fynbos Biome	Southwest Fynbos Bioregion	Poorly protected
Breede Shale Fynbos	0.062200000000000	FFh 4	Vulnerable	Fynbos Biome	Southwest Fynbos Bioregion	Poorly protected
Breede Shale Fynbos	32.653599999999997	FFh 4	Vulnerable	Fynbos Biome	Southwest Fynbos Bioregion	Poorly protected
Breede Shale Fynbos	0.075400000000000	FFh 4	Vulnerable	Fynbos Biome	Southwest Fynbos Bioregion	Poorly protected
Breede Shale Fynbos	1.486300000000000	FFh 4	Vulnerable	Fynbos Biome	Southwest Fynbos Bioregion	Poorly protected
Breede Shale Fynbos	7.796600000000000	FFh 4	Vulnerable	Fynbos Biome	Southwest Fynbos Bioregion	Poorly protected
Breede Shale Fynbos	0.668100000000000	FFh 4	Vulnerable	Fynbos Biome	Southwest Fynbos Bioregion	Poorly protected
Breede Shale Fynbos	13.149699999999999	FFh 4	Vulnerable	Fynbos Biome	Southwest Fynbos Bioregion	Poorly protected
Breede Shale Fynbos	1.038500000000000	FFh 4	Vulnerable	Fynbos Biome	Southwest Fynbos Bioregion	Poorly protected
Breede Shale Fynbos	6.083700000000000	FFh 4	Vulnerable	Fynbos Biome	Southwest Fynbos Bioregion	Poorly protected
Breede Shale Fynbos	11.762499999999999	FFh 4	Vulnerable	Fynbos Biome	Southwest Fynbos Bioregion	Poorly protected
Breede Shale Fynbos	0.174200000000000	FFh 4	Vulnerable	Fynbos Biome	Southwest Fynbos Bioregion	Poorly protected
Breede Shale Fynbos	5.355500000000000	FFh 4	Vulnerable	Fynbos Biome	Southwest Fynbos Bioregion	Poorly protected
Breede Shale Renosterveld	149.842800000000011	FRs 8	Vulnerable	Fynbos Biome	East Coast Renosterveld Bioregion	Poorly protected
Breede Shale Renosterveld	0.488200000000000	FRs 8	Vulnerable	Fynbos Biome	East Coast Renosterveld Bioregion	Poorly protected
Breede Shale Renosterveld	3.475200000000000	FRs 8	Vulnerable	Fynbos Biome	East Coast Renosterveld Bioregion	Poorly protected
Breede Shale Renosterveld	11.078900000000001	FRs 8	Vulnerable	Fynbos Biome	East Coast Renosterveld Bioregion	Poorly protected
Breede Shale Renosterveld	10.544100000000000	FRs 8	Vulnerable	Fynbos Biome	East Coast Renosterveld Bioregion	Poorly protected
Breede Shale Renosterveld	10.760199999999999	FRs 8	Vulnerable	Fynbos Biome	East Coast Renosterveld Bioregion	Poorly protected
Breede Shale Renosterveld	3.621600000000000	FRs 8	Vulnerable	Fynbos Biome	East Coast Renosterveld Bioregion	Poorly protected
Breede Shale Renosterveld	2.865500000000000	FRs 8	Vulnerable	Fynbos Biome	East Coast Renosterveld Bioregion	Poorly protected
Breede Shale Renosterveld	0.847700000000000	FRs 8	Vulnerable	Fynbos Biome	East Coast Renosterveld Bioregion	Poorly protected
Breede Shale Renosterveld	35.219600000000000	FRs 8	Vulnerable	Fynbos Biome	East Coast Renosterveld Bioregion	Poorly protected
Breede Shale Renosterveld	1.624300000000000	FRs 8	Vulnerable	Fynbos Biome	East Coast Renosterveld Bioregion	Poorly protected
Breede Shale Renosterveld	1.416100000000000	FRs 8	Vulnerable	Fynbos Biome	East Coast Renosterveld Bioregion	Poorly protected
Breede Shale Renosterveld	1.073300000000000	FRs 8	Vulnerable	Fynbos Biome	East Coast Renosterveld Bioregion	Poorly protected
Breede Shale Renosterveld	0.572300000000000	FRs 8	Vulnerable	Fynbos Biome	East Coast Renosterveld Bioregion	Poorly protected
Breede Shale Renosterveld	0.318900000000000	FRs 8	Vulnerable	Fynbos Biome	East Coast Renosterveld Bioregion	Poorly protected
Breede Shale Renosterveld	0.463500000000000	FRs 8	Vulnerable	Fynbos Biome	East Coast Renosterveld Bioregion	Poorly protected
Breede Shale Renosterveld	1.576700000000000	FRs 8	Vulnerable	Fynbos Biome	East Coast Renosterveld Bioregion	Poorly protected
Breede Shale Renosterveld	1.525300000000000	FRs 8	Vulnerable	Fynbos Biome	East Coast Renosterveld Bioregion	Poorly protected
Breede Shale Renosterveld	0.612100000000000	FRs 8	Vulnerable	Fynbos Biome	East Coast Renosterveld Bioregion	Poorly protected
Breede Shale Renosterveld	9.950200000000001	FRs 8	Vulnerable	Fynbos Biome	East Coast Renosterveld Bioregion	Poorly protected
Breede Shale Renosterveld	43.552100000000003	FRs 8	Vulnerable	Fynbos Biome	East Coast Renosterveld Bioregion	Poorly protected
Breede Shale Renosterveld	0.293000000000000	FRs 8	Vulnerable	Fynbos Biome	East Coast Renosterveld Bioregion	Poorly protected
Breede Shale Renosterveld	0.272000000000000	FRs 8	Vulnerable	Fynbos Biome	East Coast Renosterveld Bioregion	Poorly protected
Breede Shale Renosterveld	1.410200000000000	FRs 8	Vulnerable	Fynbos Biome	East Coast Renosterveld Bioregion	Poorly protected
Breede Shale Renosterveld	1.073600000000000	FRs 8	Vulnerable	Fynbos Biome	East Coast Renosterveld Bioregion	Poorly protected
Breede Shale Renosterveld	0.957000000000000	FRs 8	Vulnerable	Fynbos Biome	East Coast Renosterveld Bioregion	Poorly protected
Breede Shale Renosterveld	0.539000000000000	FRs 8	Vulnerable	Fynbos Biome	East Coast Renosterveld Bioregion	Poorly protected
Breede Shale Renosterveld	13.045000000000000	FRs 8	Vulnerable	Fynbos Biome	East Coast Renosterveld Bioregion	Poorly protected
Breede Shale Renosterveld	0.208500000000000	FRs 8	Vulnerable	Fynbos Biome	East Coast Renosterveld Bioregion	Poorly protected
Breede Shale Renosterveld	1.214900000000000	FRs 8	Vulnerable	Fynbos Biome	East Coast Renosterveld Bioregion	Poorly protected
Breede Shale Renosterveld	0.264000000000000	FRs 8	Vulnerable	Fynbos Biome	East Coast Renosterveld Bioregion	Poorly protected
Breede Shale Renosterveld	0.245300000000000	FRs 8	Vulnerable	Fynbos Biome	East Coast Renosterveld Bioregion	Poorly protected
Breede Shale Renosterveld	0.141200000000000	FRs 8	Vulnerable	Fynbos Biome	East Coast Renosterveld Bioregion	Poorly protected
Breede Shale Renosterveld	5.898700000000000	FRs 8	Vulnerable	Fynbos Biome	East Coast Renosterveld Bioregion	Poorly protected
Breede Shale Renosterveld	1.464700000000000	FRs 8	Vulnerable	Fynbos Biome	East Coast Renosterveld Bioregion	Poorly protected
Breede Shale Renosterveld	3.799900000000000	FRs 8	Vulnerable	Fynbos Biome	East Coast Renosterveld Bioregion	Poorly protected
Breede Shale Renosterveld	0.055600000000000	FRs 8	Vulnerable	Fynbos Biome	East Coast Renosterveld Bioregion	Poorly protected
Breede Shale Renosterveld	0.077200000000000	FRs 8	Vulnerable	Fynbos Biome	East Coast Renosterveld Bioregion	Poorly protected
Breede Shale Renosterveld	0.306900000000000	FRs 8	Vulnerable	Fynbos Biome	East Coast Renosterveld Bioregion	Poorly protected
Breede Shale Renosterveld	0.934200000000000	FRs 8	Vulnerable	Fynbos Biome	East Coast Renosterveld Bioregion	Poorly protected
Breede Shale Renosterveld	3.224500000000000	FRs 8	Vulnerable	Fynbos Biome	East Coast Renosterveld Bioregion	Poorly protected
Breede Shale Renosterveld	0.625300000000000	FRs 8	Vulnerable	Fynbos Biome	East Coast Renosterveld Bioregion	Poorly protected
Breede Shale Renosterveld	0.263400000000000	FRs 8	Vulnerable	Fynbos Biome	East Coast Renosterveld Bioregion	Poorly protected
Breede Shale Renosterveld	4.238500000000000	FRs 8	Vulnerable	Fynbos Biome	East Coast Renosterveld Bioregion	Poorly protected
Breede Shale Renosterveld	0.434000000000000	FRs 8	Vulnerable	Fynbos Biome	East Coast Renosterveld Bioregion	Poorly protected
Breede Shale Renosterveld	0.073100000000000	FRs 8	Vulnerable	Fynbos Biome	East Coast Renosterveld Bioregion	Poorly protected
Breede Shale Renosterveld	0.073700000000000	FRs 8	Vulnerable	Fynbos Biome	East Coast Renosterveld Bioregion	Poorly protected
Breede Shale Renosterveld	0.387000000000000	FRs 8	Vulnerable	Fynbos Biome	East Coast Renosterveld Bioregion	Poorly protected
Breede Shale Renosterveld	0.801800000000000	FRs 8	Vulnerable	Fynbos Biome	East Coast Renosterveld Bioregion	Poorly protected
Breede Shale Renosterveld	2.856100000000000	FRs 8	Vulnerable	Fynbos Biome	East Coast Renosterveld Bioregion	Poorly protected
Breede Shale Renosterveld	0.486100000000000	FRs 8	Vulnerable	Fynbos Biome	East Coast Renosterveld Bioregion	Poorly protected
Breede Shale Renosterveld	15.358499999999999	FRs 8	Vulnerable	Fynbos Biome	East Coast Renosterveld Bioregion	Poorly protected
Breede Shale Renosterveld	0.133900000000000	FRs 8	Vulnerable	Fynbos Biome	East Coast Renosterveld Bioregion	Poorly protected
Breede Shale Renosterveld	7.940800000000000	FRs 8	Vulnerable	Fynbos Biome	East Coast Renosterveld Bioregion	Poorly protected
Breede Shale Renosterveld	0.518500000000000	FRs 8	Vulnerable	Fynbos Biome	East Coast Renosterveld Bioregion	Poorly protected
Breede Shale Renosterveld	2.113300000000000	FRs 8	Vulnerable	Fynbos Biome	East Coast Renosterveld Bioregion	Poorly protected
Breede Shale Renosterveld	48.240400000000001	FRs 8	Vulnerable	Fynbos Biome	East Coast Renosterveld Bioregion	Poorly protected
Breede Shale Renosterveld	0.134200000000000	FRs 8	Vulnerable	Fynbos Biome	East Coast Renosterveld Bioregion	Poorly protected
Breede Shale Renosterveld	0.133100000000000	FRs 8	Vulnerable	Fynbos Biome	East Coast Renosterveld Bioregion	Poorly protected
Breede Shale Renosterveld	3.079400000000000	FRs 8	Vulnerable	Fynbos Biome	East Coast Renosterveld Bioregion	Poorly protected
Breede Shale Renosterveld	10.441599999999999	FRs 8	Vulnerable	Fynbos Biome	East Coast Renosterveld Bioregion	Poorly protected
Breede Shale Renosterveld	2.706800000000000	FRs 8	Vulnerable	Fynbos Biome	East Coast Renosterveld Bioregion	Poorly protected
Breede Shale Renosterveld	0.070000000000000	FRs 8	Vulnerable	Fynbos Biome	East Coast Renosterveld Bioregion	Poorly protected
Breede Shale Renosterveld	0.263500000000000	FRs 8	Vulnerable	Fynbos Biome	East Coast Renosterveld Bioregion	Poorly protected
Breede Shale Renosterveld	7.089700000000000	FRs 8	Vulnerable	Fynbos Biome	East Coast Renosterveld Bioregion	Poorly protected
Breede Shale Renosterveld	0.094000000000000	FRs 8	Vulnerable	Fynbos Biome	East Coast Renosterveld Bioregion	Poorly protected
Breede Shale Renosterveld	0.107800000000000	FRs 8	Vulnerable	Fynbos Biome	East Coast Renosterveld Bioregion	Poorly protected
Breede Shale Renosterveld	0.136800000000000	FRs 8	Vulnerable	Fynbos Biome	East Coast Renosterveld Bioregion	Poorly protected
Breede Shale Renosterveld	0.619600000000000	FRs 8	Vulnerable	Fynbos Biome	East Coast Renosterveld Bioregion	Poorly protected
Breede Shale Renosterveld	0.188100000000000	FRs 8	Vulnerable	Fynbos Biome	East Coast Renosterveld Bioregion	Poorly protected
Breede Shale Renosterveld	1.602700000000000	FRs 8	Vulnerable	Fynbos Biome	East Coast Renosterveld Bioregion	Poorly protected
Breede Shale Renosterveld	6.986500000000000	FRs 8	Vulnerable	Fynbos Biome	East Coast Renosterveld Bioregion	Poorly protected
Breede Shale Renosterveld	1.861500000000000	FRs 8	Vulnerable	Fynbos Biome	East Coast Renosterveld Bioregion	Poorly protected
Breede Shale Renosterveld	0.163400000000000	FRs 8	Vulnerable	Fynbos Biome	East Coast Renosterveld Bioregion	Poorly protected
Breede Shale Renosterveld	0.153400000000000	FRs 8	Vulnerable	Fynbos Biome	East Coast Renosterveld Bioregion	Poorly protected
Breede Shale Renosterveld	0.177600000000000	FRs 8	Vulnerable	Fynbos Biome	East Coast Renosterveld Bioregion	Poorly protected
Breede Shale Renosterveld	113.690600000000003	FRs 8	Vulnerable	Fynbos Biome	East Coast Renosterveld Bioregion	Poorly protected
Breede Shale Renosterveld	7.565500000000000	FRs 8	Vulnerable	Fynbos Biome	East Coast Renosterveld Bioregion	Poorly protected
Breede Shale Renosterveld	0.244200000000000	FRs 8	Vulnerable	Fynbos Biome	East Coast Renosterveld Bioregion	Poorly protected
Breede Shale Renosterveld	3.840300000000000	FRs 8	Vulnerable	Fynbos Biome	East Coast Renosterveld Bioregion	Poorly protected
Breede Shale Renosterveld	0.856800000000000	FRs 8	Vulnerable	Fynbos Biome	East Coast Renosterveld Bioregion	Poorly protected
Breede Shale Renosterveld	0.151600000000000	FRs 8	Vulnerable	Fynbos Biome	East Coast Renosterveld Bioregion	Poorly protected
Breede Shale Renosterveld	9.323700000000001	FRs 8	Vulnerable	Fynbos Biome	East Coast Renosterveld Bioregion	Poorly protected
Breede Shale Renosterveld	93.960200000000000	FRs 8	Vulnerable	Fynbos Biome	East Coast Renosterveld Bioregion	Poorly protected
Breede Shale Renosterveld	17.817399999999999	FRs 8	Vulnerable	Fynbos Biome	East Coast Renosterveld Bioregion	Poorly protected
Breede Shale Renosterveld	12.415200000000000	FRs 8	Vulnerable	Fynbos Biome	East Coast Renosterveld Bioregion	Poorly protected
Breede Shale Renosterveld	93.629700000000000	FRs 8	Vulnerable	Fynbos Biome	East Coast Renosterveld Bioregion	Poorly protected
Breede Shale Renosterveld	1.002300000000000	FRs 8	Vulnerable	Fynbos Biome	East Coast Renosterveld Bioregion	Poorly protected
Breede Shale Renosterveld	203.426099999999991	FRs 8	Vulnerable	Fynbos Biome	East Coast Renosterveld Bioregion	Poorly protected
Breede Shale Renosterveld	3.492600000000000	FRs 8	Vulnerable	Fynbos Biome	East Coast Renosterveld Bioregion	Poorly protected
Breede Shale Renosterveld	7.498900000000000	FRs 8	Vulnerable	Fynbos Biome	East Coast Renosterveld Bioregion	Poorly protected
Breede Shale Renosterveld	8.410600000000001	FRs 8	Vulnerable	Fynbos Biome	East Coast Renosterveld Bioregion	Poorly protected
Breede Shale Renosterveld	5.923100000000000	FRs 8	Vulnerable	Fynbos Biome	East Coast Renosterveld Bioregion	Poorly protected
Breede Shale Renosterveld	3.399400000000000	FRs 8	Vulnerable	Fynbos Biome	East Coast Renosterveld Bioregion	Poorly protected
Breede Shale Renosterveld	0.872500000000000	FRs 8	Vulnerable	Fynbos Biome	East Coast Renosterveld Bioregion	Poorly protected
Breede Shale Renosterveld	0.133800000000000	FRs 8	Vulnerable	Fynbos Biome	East Coast Renosterveld Bioregion	Poorly protected
Breede Shale Renosterveld	0.748600000000000	FRs 8	Vulnerable	Fynbos Biome	East Coast Renosterveld Bioregion	Poorly protected
Breede Shale Renosterveld	0.404800000000000	FRs 8	Vulnerable	Fynbos Biome	East Coast Renosterveld Bioregion	Poorly protected
Breede Shale Renosterveld	10.141100000000000	FRs 8	Vulnerable	Fynbos Biome	East Coast Renosterveld Bioregion	Poorly protected
Buffels Thicket	20.845700000000001	AT 12	Vulnerable	Albany Thicket Biome	Albany Thicket	Hardly protected
Buffels Thicket	79.879199999999997	AT 12	Vulnerable	Albany Thicket Biome	Albany Thicket	Hardly protected
Buffels Thicket	94.887000000000000	AT 12	Vulnerable	Albany Thicket Biome	Albany Thicket	Hardly protected
Buffels Thicket	80.612600000000000	AT 12	Vulnerable	Albany Thicket Biome	Albany Thicket	Hardly protected
Buffels Thicket	1.143100000000000	AT 12	Vulnerable	Albany Thicket Biome	Albany Thicket	Hardly protected
Buffels Thicket	114.148700000000005	AT 12	Vulnerable	Albany Thicket Biome	Albany Thicket	Hardly protected
Buffels Thicket	2.875600000000000	AT 12	Vulnerable	Albany Thicket Biome	Albany Thicket	Hardly protected
Buffels Thicket	229.499799999999993	AT 12	Vulnerable	Albany Thicket Biome	Albany Thicket	Hardly protected
Buffels Thicket	508.304199999999980	AT 12	Vulnerable	Albany Thicket Biome	Albany Thicket	Hardly protected
Bushmanland Arid Grassland	124.964299999999994	NKb 3	Least threatened	Nama-Karoo Biome	Bushmanland Bioregion	Hardly protected
Bushmanland Arid Grassland	54.330300000000001	NKb 3	Least threatened	Nama-Karoo Biome	Bushmanland Bioregion	Hardly protected
Bushmanland Arid Grassland	0.158000000000000	NKb 3	Least threatened	Nama-Karoo Biome	Bushmanland Bioregion	Hardly protected
Bushmanland Arid Grassland	348.144299999999987	NKb 3	Least threatened	Nama-Karoo Biome	Bushmanland Bioregion	Hardly protected
Bushmanland Arid Grassland	191.538299999999992	NKb 3	Least threatened	Nama-Karoo Biome	Bushmanland Bioregion	Hardly protected
Bushmanland Arid Grassland	15.301200000000000	NKb 3	Least threatened	Nama-Karoo Biome	Bushmanland Bioregion	Hardly protected
Bushmanland Arid Grassland	1214.198499999999967	NKb 3	Least threatened	Nama-Karoo Biome	Bushmanland Bioregion	Hardly protected
Bushmanland Arid Grassland	5.040000000000000	NKb 3	Least threatened	Nama-Karoo Biome	Bushmanland Bioregion	Hardly protected
Bushmanland Arid Grassland	2.920300000000000	NKb 3	Least threatened	Nama-Karoo Biome	Bushmanland Bioregion	Hardly protected
Bushmanland Arid Grassland	93.653499999999994	NKb 3	Least threatened	Nama-Karoo Biome	Bushmanland Bioregion	Hardly protected
Bushmanland Arid Grassland	1.251700000000000	NKb 3	Least threatened	Nama-Karoo Biome	Bushmanland Bioregion	Hardly protected
Bushmanland Arid Grassland	787.147100000000023	NKb 3	Least threatened	Nama-Karoo Biome	Bushmanland Bioregion	Hardly protected
Bushmanland Arid Grassland	41085.106699999996636	NKb 3	Least threatened	Nama-Karoo Biome	Bushmanland Bioregion	Hardly protected
Bushmanland Arid Grassland	144.107900000000001	NKb 3	Least threatened	Nama-Karoo Biome	Bushmanland Bioregion	Hardly protected
Bushmanland Arid Grassland	76.405699999999996	NKb 3	Least threatened	Nama-Karoo Biome	Bushmanland Bioregion	Hardly protected
Bushmanland Arid Grassland	255.911900000000003	NKb 3	Least threatened	Nama-Karoo Biome	Bushmanland Bioregion	Hardly protected
Bushmanland Arid Grassland	158.579100000000011	NKb 3	Least threatened	Nama-Karoo Biome	Bushmanland Bioregion	Hardly protected
Bushmanland Arid Grassland	40.711799999999997	NKb 3	Least threatened	Nama-Karoo Biome	Bushmanland Bioregion	Hardly protected
Bushmanland Arid Grassland	9.976200000000000	NKb 3	Least threatened	Nama-Karoo Biome	Bushmanland Bioregion	Hardly protected
Bushmanland Arid Grassland	19.981400000000001	NKb 3	Least threatened	Nama-Karoo Biome	Bushmanland Bioregion	Hardly protected
Bushmanland Arid Grassland	4.875600000000000	NKb 3	Least threatened	Nama-Karoo Biome	Bushmanland Bioregion	Hardly protected
Bushmanland Arid Grassland	0.826200000000000	NKb 3	Least threatened	Nama-Karoo Biome	Bushmanland Bioregion	Hardly protected
Bushmanland Arid Grassland	20.072199999999999	NKb 3	Least threatened	Nama-Karoo Biome	Bushmanland Bioregion	Hardly protected
Bushmanland Arid Grassland	21.594799999999999	NKb 3	Least threatened	Nama-Karoo Biome	Bushmanland Bioregion	Hardly protected
Bushmanland Arid Grassland	28.683199999999999	NKb 3	Least threatened	Nama-Karoo Biome	Bushmanland Bioregion	Hardly protected
Bushmanland Arid Grassland	114.837400000000002	NKb 3	Least threatened	Nama-Karoo Biome	Bushmanland Bioregion	Hardly protected
Bushmanland Arid Grassland	0.089200000000000	NKb 3	Least threatened	Nama-Karoo Biome	Bushmanland Bioregion	Hardly protected
Bushmanland Arid Grassland	0.462400000000000	NKb 3	Least threatened	Nama-Karoo Biome	Bushmanland Bioregion	Hardly protected
Bushmanland Arid Grassland	0.664600000000000	NKb 3	Least threatened	Nama-Karoo Biome	Bushmanland Bioregion	Hardly protected
Bushmanland Arid Grassland	0.208300000000000	NKb 3	Least threatened	Nama-Karoo Biome	Bushmanland Bioregion	Hardly protected
Bushmanland Arid Grassland	4.542600000000000	NKb 3	Least threatened	Nama-Karoo Biome	Bushmanland Bioregion	Hardly protected
Bushmanland Arid Grassland	0.692100000000000	NKb 3	Least threatened	Nama-Karoo Biome	Bushmanland Bioregion	Hardly protected
Bushmanland Arid Grassland	6.578300000000000	NKb 3	Least threatened	Nama-Karoo Biome	Bushmanland Bioregion	Hardly protected
Bushmanland Arid Grassland	0.157100000000000	NKb 3	Least threatened	Nama-Karoo Biome	Bushmanland Bioregion	Hardly protected
Bushmanland Arid Grassland	18.427199999999999	NKb 3	Least threatened	Nama-Karoo Biome	Bushmanland Bioregion	Hardly protected
Bushmanland Arid Grassland	33.594700000000003	NKb 3	Least threatened	Nama-Karoo Biome	Bushmanland Bioregion	Hardly protected
Bushmanland Arid Grassland	296.280399999999986	NKb 3	Least threatened	Nama-Karoo Biome	Bushmanland Bioregion	Hardly protected
Bushmanland Arid Grassland	0.097600000000000	NKb 3	Least threatened	Nama-Karoo Biome	Bushmanland Bioregion	Hardly protected
Bushmanland Arid Grassland	0.115900000000000	NKb 3	Least threatened	Nama-Karoo Biome	Bushmanland Bioregion	Hardly protected
Bushmanland Arid Grassland	5.007000000000000	NKb 3	Least threatened	Nama-Karoo Biome	Bushmanland Bioregion	Hardly protected
Bushmanland Arid Grassland	35.508099999999999	NKb 3	Least threatened	Nama-Karoo Biome	Bushmanland Bioregion	Hardly protected
Bushmanland Arid Grassland	187.619100000000003	NKb 3	Least threatened	Nama-Karoo Biome	Bushmanland Bioregion	Hardly protected
Bushmanland Arid Grassland	47.351100000000002	NKb 3	Least threatened	Nama-Karoo Biome	Bushmanland Bioregion	Hardly protected
Bushmanland Arid Grassland	2.974300000000000	NKb 3	Least threatened	Nama-Karoo Biome	Bushmanland Bioregion	Hardly protected
Bushmanland Arid Grassland	11.311000000000000	NKb 3	Least threatened	Nama-Karoo Biome	Bushmanland Bioregion	Hardly protected
Bushmanland Arid Grassland	0.766900000000000	NKb 3	Least threatened	Nama-Karoo Biome	Bushmanland Bioregion	Hardly protected
Bushmanland Arid Grassland	6.191800000000000	NKb 3	Least threatened	Nama-Karoo Biome	Bushmanland Bioregion	Hardly protected
Bushmanland Basin Shrubland	16809.278399999999237	NKb 6	Least threatened	Nama-Karoo Biome	Bushmanland Bioregion	Not protected
Bushmanland Basin Shrubland	7.358700000000000	NKb 6	Least threatened	Nama-Karoo Biome	Bushmanland Bioregion	Not protected
Bushmanland Basin Shrubland	12.892500000000000	NKb 6	Least threatened	Nama-Karoo Biome	Bushmanland Bioregion	Not protected
Bushmanland Basin Shrubland	2.395100000000000	NKb 6	Least threatened	Nama-Karoo Biome	Bushmanland Bioregion	Not protected
Bushmanland Basin Shrubland	36.869100000000003	NKb 6	Least threatened	Nama-Karoo Biome	Bushmanland Bioregion	Not protected
Bushmanland Basin Shrubland	17244.711100000000442	NKb 6	Least threatened	Nama-Karoo Biome	Bushmanland Bioregion	Not protected
Bushmanland Basin Shrubland	3.881900000000000	NKb 6	Least threatened	Nama-Karoo Biome	Bushmanland Bioregion	Not protected
Bushmanland Basin Shrubland	8.781100000000000	NKb 6	Least threatened	Nama-Karoo Biome	Bushmanland Bioregion	Not protected
Bushmanland Basin Shrubland	7.445400000000000	NKb 6	Least threatened	Nama-Karoo Biome	Bushmanland Bioregion	Not protected
Bushmanland Basin Shrubland	15.926100000000000	NKb 6	Least threatened	Nama-Karoo Biome	Bushmanland Bioregion	Not protected
Bushmanland Basin Shrubland	0.252500000000000	NKb 6	Least threatened	Nama-Karoo Biome	Bushmanland Bioregion	Not protected
Bushmanland Basin Shrubland	0.106400000000000	NKb 6	Least threatened	Nama-Karoo Biome	Bushmanland Bioregion	Not protected
Bushmanland Basin Shrubland	169.395100000000014	NKb 6	Least threatened	Nama-Karoo Biome	Bushmanland Bioregion	Not protected
Bushmanland Basin Shrubland	124.446600000000004	NKb 6	Least threatened	Nama-Karoo Biome	Bushmanland Bioregion	Not protected
Bushmanland Basin Shrubland	10.070600000000001	NKb 6	Least threatened	Nama-Karoo Biome	Bushmanland Bioregion	Not protected
Bushmanland Basin Shrubland	23.703199999999999	NKb 6	Least threatened	Nama-Karoo Biome	Bushmanland Bioregion	Not protected
Bushmanland Basin Shrubland	28.750900000000001	NKb 6	Least threatened	Nama-Karoo Biome	Bushmanland Bioregion	Not protected
Bushmanland Basin Shrubland	178.324099999999987	NKb 6	Least threatened	Nama-Karoo Biome	Bushmanland Bioregion	Not protected
Bushmanland Basin Shrubland	6.086400000000000	NKb 6	Least threatened	Nama-Karoo Biome	Bushmanland Bioregion	Not protected
Bushmanland Inselberg Shrubland	9.566000000000001	SKr 18	Least threatened	Succulent Karoo Biome	Richtersveld Bioregion	Not protected
Bushmanland Inselberg Shrubland	5.995300000000000	SKr 18	Least threatened	Succulent Karoo Biome	Richtersveld Bioregion	Not protected
Bushmanland Inselberg Shrubland	13.028600000000001	SKr 18	Least threatened	Succulent Karoo Biome	Richtersveld Bioregion	Not protected
Bushmanland Inselberg Shrubland	11.285399999999999	SKr 18	Least threatened	Succulent Karoo Biome	Richtersveld Bioregion	Not protected
Bushmanland Inselberg Shrubland	157.217000000000013	SKr 18	Least threatened	Succulent Karoo Biome	Richtersveld Bioregion	Not protected
Bushmanland Inselberg Shrubland	8.947300000000000	SKr 18	Least threatened	Succulent Karoo Biome	Richtersveld Bioregion	Not protected
Bushmanland Inselberg Shrubland	18.029499999999999	SKr 18	Least threatened	Succulent Karoo Biome	Richtersveld Bioregion	Not protected
Bushmanland Inselberg Shrubland	5.373200000000000	SKr 18	Least threatened	Succulent Karoo Biome	Richtersveld Bioregion	Not protected
Bushmanland Inselberg Shrubland	2.259300000000000	SKr 18	Least threatened	Succulent Karoo Biome	Richtersveld Bioregion	Not protected
Bushmanland Inselberg Shrubland	44.808100000000003	SKr 18	Least threatened	Succulent Karoo Biome	Richtersveld Bioregion	Not protected
Bushmanland Inselberg Shrubland	5.380000000000000	SKr 18	Least threatened	Succulent Karoo Biome	Richtersveld Bioregion	Not protected
Bushmanland Inselberg Shrubland	5.309100000000000	SKr 18	Least threatened	Succulent Karoo Biome	Richtersveld Bioregion	Not protected
Bushmanland Inselberg Shrubland	9.376200000000001	SKr 18	Least threatened	Succulent Karoo Biome	Richtersveld Bioregion	Not protected
Bushmanland Inselberg Shrubland	1.755200000000000	SKr 18	Least threatened	Succulent Karoo Biome	Richtersveld Bioregion	Not protected
Bushmanland Inselberg Shrubland	5.533000000000000	SKr 18	Least threatened	Succulent Karoo Biome	Richtersveld Bioregion	Not protected
Bushmanland Inselberg Shrubland	28.098800000000001	SKr 18	Least threatened	Succulent Karoo Biome	Richtersveld Bioregion	Not protected
Bushmanland Inselberg Shrubland	1.844700000000000	SKr 18	Least threatened	Succulent Karoo Biome	Richtersveld Bioregion	Not protected
Bushmanland Inselberg Shrubland	75.319699999999997	SKr 18	Least threatened	Succulent Karoo Biome	Richtersveld Bioregion	Not protected
Bushmanland Inselberg Shrubland	30.159300000000002	SKr 18	Least threatened	Succulent Karoo Biome	Richtersveld Bioregion	Not protected
Bushmanland Inselberg Shrubland	19.526100000000000	SKr 18	Least threatened	Succulent Karoo Biome	Richtersveld Bioregion	Not protected
Bushmanland Inselberg Shrubland	1.399600000000000	SKr 18	Least threatened	Succulent Karoo Biome	Richtersveld Bioregion	Not protected
Bushmanland Inselberg Shrubland	0.851000000000000	SKr 18	Least threatened	Succulent Karoo Biome	Richtersveld Bioregion	Not protected
Bushmanland Inselberg Shrubland	2.194100000000000	SKr 18	Least threatened	Succulent Karoo Biome	Richtersveld Bioregion	Not protected
Bushmanland Inselberg Shrubland	2.833200000000000	SKr 18	Least threatened	Succulent Karoo Biome	Richtersveld Bioregion	Not protected
Bushmanland Inselberg Shrubland	2.801800000000000	SKr 18	Least threatened	Succulent Karoo Biome	Richtersveld Bioregion	Not protected
Bushmanland Inselberg Shrubland	9.357400000000000	SKr 18	Least threatened	Succulent Karoo Biome	Richtersveld Bioregion	Not protected
Bushmanland Inselberg Shrubland	1.850200000000000	SKr 18	Least threatened	Succulent Karoo Biome	Richtersveld Bioregion	Not protected
Bushmanland Inselberg Shrubland	0.821700000000000	SKr 18	Least threatened	Succulent Karoo Biome	Richtersveld Bioregion	Not protected
Bushmanland Inselberg Shrubland	6.743600000000000	SKr 18	Least threatened	Succulent Karoo Biome	Richtersveld Bioregion	Not protected
Bushmanland Inselberg Shrubland	44.859200000000001	SKr 18	Least threatened	Succulent Karoo Biome	Richtersveld Bioregion	Not protected
Bushmanland Inselberg Shrubland	6.909300000000000	SKr 18	Least threatened	Succulent Karoo Biome	Richtersveld Bioregion	Not protected
Bushmanland Inselberg Shrubland	2.203200000000000	SKr 18	Least threatened	Succulent Karoo Biome	Richtersveld Bioregion	Not protected
Bushmanland Inselberg Shrubland	2.176800000000000	SKr 18	Least threatened	Succulent Karoo Biome	Richtersveld Bioregion	Not protected
Bushmanland Inselberg Shrubland	1.944600000000000	SKr 18	Least threatened	Succulent Karoo Biome	Richtersveld Bioregion	Not protected
Bushmanland Inselberg Shrubland	4.157200000000000	SKr 18	Least threatened	Succulent Karoo Biome	Richtersveld Bioregion	Not protected
Bushmanland Inselberg Shrubland	1.955400000000000	SKr 18	Least threatened	Succulent Karoo Biome	Richtersveld Bioregion	Not protected
Bushmanland Inselberg Shrubland	21.253299999999999	SKr 18	Least threatened	Succulent Karoo Biome	Richtersveld Bioregion	Not protected
Bushmanland Inselberg Shrubland	3.879700000000000	SKr 18	Least threatened	Succulent Karoo Biome	Richtersveld Bioregion	Not protected
Bushmanland Inselberg Shrubland	4.951300000000000	SKr 18	Least threatened	Succulent Karoo Biome	Richtersveld Bioregion	Not protected
Bushmanland Inselberg Shrubland	4.835400000000000	SKr 18	Least threatened	Succulent Karoo Biome	Richtersveld Bioregion	Not protected
Bushmanland Inselberg Shrubland	7.250400000000000	SKr 18	Least threatened	Succulent Karoo Biome	Richtersveld Bioregion	Not protected
Bushmanland Inselberg Shrubland	1.235600000000000	SKr 18	Least threatened	Succulent Karoo Biome	Richtersveld Bioregion	Not protected
Bushmanland Inselberg Shrubland	5.358000000000000	SKr 18	Least threatened	Succulent Karoo Biome	Richtersveld Bioregion	Not protected
Bushmanland Inselberg Shrubland	22.998699999999999	SKr 18	Least threatened	Succulent Karoo Biome	Richtersveld Bioregion	Not protected
Bushmanland Inselberg Shrubland	5.198900000000000	SKr 18	Least threatened	Succulent Karoo Biome	Richtersveld Bioregion	Not protected
Bushmanland Inselberg Shrubland	3.811700000000000	SKr 18	Least threatened	Succulent Karoo Biome	Richtersveld Bioregion	Not protected
Bushmanland Inselberg Shrubland	3.290500000000000	SKr 18	Least threatened	Succulent Karoo Biome	Richtersveld Bioregion	Not protected
Bushmanland Inselberg Shrubland	1.589500000000000	SKr 18	Least threatened	Succulent Karoo Biome	Richtersveld Bioregion	Not protected
Bushmanland Sandy Grassland	146.799499999999995	NKb 4	Least threatened	Nama-Karoo Biome	Bushmanland Bioregion	Not protected
Bushmanland Sandy Grassland	29.160100000000000	NKb 4	Least threatened	Nama-Karoo Biome	Bushmanland Bioregion	Not protected
Bushmanland Sandy Grassland	252.931099999999986	NKb 4	Least threatened	Nama-Karoo Biome	Bushmanland Bioregion	Not protected
Bushmanland Sandy Grassland	10.407400000000001	NKb 4	Least threatened	Nama-Karoo Biome	Bushmanland Bioregion	Not protected
Bushmanland Sandy Grassland	5.754400000000000	NKb 4	Least threatened	Nama-Karoo Biome	Bushmanland Bioregion	Not protected
Bushmanland Sandy Grassland	26.812600000000000	NKb 4	Least threatened	Nama-Karoo Biome	Bushmanland Bioregion	Not protected
Bushmanland Sandy Grassland	15.730300000000000	NKb 4	Least threatened	Nama-Karoo Biome	Bushmanland Bioregion	Not protected
Bushmanland Sandy Grassland	1153.723199999999906	NKb 4	Least threatened	Nama-Karoo Biome	Bushmanland Bioregion	Not protected
Bushmanland Sandy Grassland	19.037900000000000	NKb 4	Least threatened	Nama-Karoo Biome	Bushmanland Bioregion	Not protected
Bushmanland Sandy Grassland	149.584499999999991	NKb 4	Least threatened	Nama-Karoo Biome	Bushmanland Bioregion	Not protected
Bushmanland Sandy Grassland	0.646400000000000	NKb 4	Least threatened	Nama-Karoo Biome	Bushmanland Bioregion	Not protected
Bushmanland Sandy Grassland	34.574300000000001	NKb 4	Least threatened	Nama-Karoo Biome	Bushmanland Bioregion	Not protected
Bushmanland Sandy Grassland	1.082300000000000	NKb 4	Least threatened	Nama-Karoo Biome	Bushmanland Bioregion	Not protected
Bushmanland Sandy Grassland	24.719899999999999	NKb 4	Least threatened	Nama-Karoo Biome	Bushmanland Bioregion	Not protected
Bushmanland Sandy Grassland	1.885800000000000	NKb 4	Least threatened	Nama-Karoo Biome	Bushmanland Bioregion	Not protected
Bushmanland Sandy Grassland	167.270199999999988	NKb 4	Least threatened	Nama-Karoo Biome	Bushmanland Bioregion	Not protected
Bushmanland Sandy Grassland	212.223199999999991	NKb 4	Least threatened	Nama-Karoo Biome	Bushmanland Bioregion	Not protected
Bushmanland Sandy Grassland	30.643500000000000	NKb 4	Least threatened	Nama-Karoo Biome	Bushmanland Bioregion	Not protected
Bushmanland Vloere	0.423900000000000	AZi 5	Least threatened	Azonal Vegetation	Inland Saline Vegetation	Not protected
Bushmanland Vloere	1.287200000000000	AZi 5	Least threatened	Azonal Vegetation	Inland Saline Vegetation	Not protected
Bushmanland Vloere	1.745600000000000	AZi 5	Least threatened	Azonal Vegetation	Inland Saline Vegetation	Not protected
Bushmanland Vloere	1.187800000000000	AZi 5	Least threatened	Azonal Vegetation	Inland Saline Vegetation	Not protected
Bushmanland Vloere	0.529200000000000	AZi 5	Least threatened	Azonal Vegetation	Inland Saline Vegetation	Not protected
Bushmanland Vloere	0.122000000000000	AZi 5	Least threatened	Azonal Vegetation	Inland Saline Vegetation	Not protected
Bushmanland Vloere	2.034700000000000	AZi 5	Least threatened	Azonal Vegetation	Inland Saline Vegetation	Not protected
Bushmanland Vloere	0.509700000000000	AZi 5	Least threatened	Azonal Vegetation	Inland Saline Vegetation	Not protected
Bushmanland Vloere	0.162100000000000	AZi 5	Least threatened	Azonal Vegetation	Inland Saline Vegetation	Not protected
Bushmanland Vloere	0.608300000000000	AZi 5	Least threatened	Azonal Vegetation	Inland Saline Vegetation	Not protected
Bushmanland Vloere	0.290500000000000	AZi 5	Least threatened	Azonal Vegetation	Inland Saline Vegetation	Not protected
Bushmanland Vloere	0.278200000000000	AZi 5	Least threatened	Azonal Vegetation	Inland Saline Vegetation	Not protected
Bushmanland Vloere	0.612800000000000	AZi 5	Least threatened	Azonal Vegetation	Inland Saline Vegetation	Not protected
Bushmanland Vloere	0.312000000000000	AZi 5	Least threatened	Azonal Vegetation	Inland Saline Vegetation	Not protected
Bushmanland Vloere	1.262300000000000	AZi 5	Least threatened	Azonal Vegetation	Inland Saline Vegetation	Not protected
Bushmanland Vloere	0.217100000000000	AZi 5	Least threatened	Azonal Vegetation	Inland Saline Vegetation	Not protected
Bushmanland Vloere	2.017800000000000	AZi 5	Least threatened	Azonal Vegetation	Inland Saline Vegetation	Not protected
Bushmanland Vloere	0.548700000000000	AZi 5	Least threatened	Azonal Vegetation	Inland Saline Vegetation	Not protected
Bushmanland Vloere	4.956200000000000	AZi 5	Least threatened	Azonal Vegetation	Inland Saline Vegetation	Not protected
Bushmanland Vloere	0.343600000000000	AZi 5	Least threatened	Azonal Vegetation	Inland Saline Vegetation	Not protected
Bushmanland Vloere	0.360400000000000	AZi 5	Least threatened	Azonal Vegetation	Inland Saline Vegetation	Not protected
Bushmanland Vloere	0.485400000000000	AZi 5	Least threatened	Azonal Vegetation	Inland Saline Vegetation	Not protected
Bushmanland Vloere	0.465000000000000	AZi 5	Least threatened	Azonal Vegetation	Inland Saline Vegetation	Not protected
Bushmanland Vloere	0.472600000000000	AZi 5	Least threatened	Azonal Vegetation	Inland Saline Vegetation	Not protected
Bushmanland Vloere	0.691200000000000	AZi 5	Least threatened	Azonal Vegetation	Inland Saline Vegetation	Not protected
Bushmanland Vloere	0.185100000000000	AZi 5	Least threatened	Azonal Vegetation	Inland Saline Vegetation	Not protected
Bushmanland Vloere	0.215400000000000	AZi 5	Least threatened	Azonal Vegetation	Inland Saline Vegetation	Not protected
Bushmanland Vloere	1.179100000000000	AZi 5	Least threatened	Azonal Vegetation	Inland Saline Vegetation	Not protected
Bushmanland Vloere	0.737200000000000	AZi 5	Least threatened	Azonal Vegetation	Inland Saline Vegetation	Not protected
Bushmanland Vloere	0.972100000000000	AZi 5	Least threatened	Azonal Vegetation	Inland Saline Vegetation	Not protected
Bushmanland Vloere	0.467900000000000	AZi 5	Least threatened	Azonal Vegetation	Inland Saline Vegetation	Not protected
Bushmanland Vloere	0.442000000000000	AZi 5	Least threatened	Azonal Vegetation	Inland Saline Vegetation	Not protected
Bushmanland Vloere	0.346800000000000	AZi 5	Least threatened	Azonal Vegetation	Inland Saline Vegetation	Not protected
Bushmanland Vloere	0.363300000000000	AZi 5	Least threatened	Azonal Vegetation	Inland Saline Vegetation	Not protected
Bushmanland Vloere	0.182600000000000	AZi 5	Least threatened	Azonal Vegetation	Inland Saline Vegetation	Not protected
Bushmanland Vloere	1.460500000000000	AZi 5	Least threatened	Azonal Vegetation	Inland Saline Vegetation	Not protected
Bushmanland Vloere	0.263400000000000	AZi 5	Least threatened	Azonal Vegetation	Inland Saline Vegetation	Not protected
Bushmanland Vloere	0.148000000000000	AZi 5	Least threatened	Azonal Vegetation	Inland Saline Vegetation	Not protected
Bushmanland Vloere	0.105400000000000	AZi 5	Least threatened	Azonal Vegetation	Inland Saline Vegetation	Not protected
Bushmanland Vloere	0.779200000000000	AZi 5	Least threatened	Azonal Vegetation	Inland Saline Vegetation	Not protected
Bushmanland Vloere	0.872600000000000	AZi 5	Least threatened	Azonal Vegetation	Inland Saline Vegetation	Not protected
Bushmanland Vloere	0.958500000000000	AZi 5	Least threatened	Azonal Vegetation	Inland Saline Vegetation	Not protected
Bushmanland Vloere	0.359000000000000	AZi 5	Least threatened	Azonal Vegetation	Inland Saline Vegetation	Not protected
Bushmanland Vloere	0.183500000000000	AZi 5	Least threatened	Azonal Vegetation	Inland Saline Vegetation	Not protected
Bushmanland Vloere	0.544100000000000	AZi 5	Least threatened	Azonal Vegetation	Inland Saline Vegetation	Not protected
Bushmanland Vloere	0.396100000000000	AZi 5	Least threatened	Azonal Vegetation	Inland Saline Vegetation	Not protected
Bushmanland Vloere	0.394800000000000	AZi 5	Least threatened	Azonal Vegetation	Inland Saline Vegetation	Not protected
Bushmanland Vloere	0.366300000000000	AZi 5	Least threatened	Azonal Vegetation	Inland Saline Vegetation	Not protected
Bushmanland Vloere	0.234800000000000	AZi 5	Least threatened	Azonal Vegetation	Inland Saline Vegetation	Not protected
Bushmanland Vloere	0.304600000000000	AZi 5	Least threatened	Azonal Vegetation	Inland Saline Vegetation	Not protected
Bushmanland Vloere	0.189600000000000	AZi 5	Least threatened	Azonal Vegetation	Inland Saline Vegetation	Not protected
Bushmanland Vloere	0.193600000000000	AZi 5	Least threatened	Azonal Vegetation	Inland Saline Vegetation	Not protected
Bushmanland Vloere	0.226400000000000	AZi 5	Least threatened	Azonal Vegetation	Inland Saline Vegetation	Not protected
Bushmanland Vloere	0.887700000000000	AZi 5	Least threatened	Azonal Vegetation	Inland Saline Vegetation	Not protected
Bushmanland Vloere	0.263400000000000	AZi 5	Least threatened	Azonal Vegetation	Inland Saline Vegetation	Not protected
Bushmanland Vloere	0.884900000000000	AZi 5	Least threatened	Azonal Vegetation	Inland Saline Vegetation	Not protected
Bushmanland Vloere	0.386600000000000	AZi 5	Least threatened	Azonal Vegetation	Inland Saline Vegetation	Not protected
Bushmanland Vloere	0.443000000000000	AZi 5	Least threatened	Azonal Vegetation	Inland Saline Vegetation	Not protected
Bushmanland Vloere	0.416400000000000	AZi 5	Least threatened	Azonal Vegetation	Inland Saline Vegetation	Not protected
Bushmanland Vloere	0.455200000000000	AZi 5	Least threatened	Azonal Vegetation	Inland Saline Vegetation	Not protected
Bushmanland Vloere	0.195300000000000	AZi 5	Least threatened	Azonal Vegetation	Inland Saline Vegetation	Not protected
Bushmanland Vloere	0.635500000000000	AZi 5	Least threatened	Azonal Vegetation	Inland Saline Vegetation	Not protected
Bushmanland Vloere	0.228500000000000	AZi 5	Least threatened	Azonal Vegetation	Inland Saline Vegetation	Not protected
Bushmanland Vloere	0.230300000000000	AZi 5	Least threatened	Azonal Vegetation	Inland Saline Vegetation	Not protected
Bushmanland Vloere	0.223800000000000	AZi 5	Least threatened	Azonal Vegetation	Inland Saline Vegetation	Not protected
Bushmanland Vloere	3.749800000000000	AZi 5	Least threatened	Azonal Vegetation	Inland Saline Vegetation	Not protected
Bushmanland Vloere	0.197100000000000	AZi 5	Least threatened	Azonal Vegetation	Inland Saline Vegetation	Not protected
Bushmanland Vloere	0.427600000000000	AZi 5	Least threatened	Azonal Vegetation	Inland Saline Vegetation	Not protected
Bushmanland Vloere	4.731200000000000	AZi 5	Least threatened	Azonal Vegetation	Inland Saline Vegetation	Not protected
Bushmanland Vloere	0.250600000000000	AZi 5	Least threatened	Azonal Vegetation	Inland Saline Vegetation	Not protected
Bushmanland Vloere	0.177000000000000	AZi 5	Least threatened	Azonal Vegetation	Inland Saline Vegetation	Not protected
Bushmanland Vloere	1.815100000000000	AZi 5	Least threatened	Azonal Vegetation	Inland Saline Vegetation	Not protected
Bushmanland Vloere	1.185500000000000	AZi 5	Least threatened	Azonal Vegetation	Inland Saline Vegetation	Not protected
Bushmanland Vloere	13.308900000000000	AZi 5	Least threatened	Azonal Vegetation	Inland Saline Vegetation	Not protected
Bushmanland Vloere	0.184400000000000	AZi 5	Least threatened	Azonal Vegetation	Inland Saline Vegetation	Not protected
Bushmanland Vloere	77.864199999999997	AZi 5	Least threatened	Azonal Vegetation	Inland Saline Vegetation	Not protected
Bushmanland Vloere	0.925900000000000	AZi 5	Least threatened	Azonal Vegetation	Inland Saline Vegetation	Not protected
Bushmanland Vloere	38.905500000000004	AZi 5	Least threatened	Azonal Vegetation	Inland Saline Vegetation	Not protected
Bushmanland Vloere	0.729700000000000	AZi 5	Least threatened	Azonal Vegetation	Inland Saline Vegetation	Not protected
Bushmanland Vloere	0.203500000000000	AZi 5	Least threatened	Azonal Vegetation	Inland Saline Vegetation	Not protected
Bushmanland Vloere	236.537299999999988	AZi 5	Least threatened	Azonal Vegetation	Inland Saline Vegetation	Not protected
Bushmanland Vloere	0.654600000000000	AZi 5	Least threatened	Azonal Vegetation	Inland Saline Vegetation	Not protected
Bushmanland Vloere	1.939800000000000	AZi 5	Least threatened	Azonal Vegetation	Inland Saline Vegetation	Not protected
Bushmanland Vloere	0.506200000000000	AZi 5	Least threatened	Azonal Vegetation	Inland Saline Vegetation	Not protected
Bushmanland Vloere	0.361200000000000	AZi 5	Least threatened	Azonal Vegetation	Inland Saline Vegetation	Not protected
Bushmanland Vloere	2.052800000000000	AZi 5	Least threatened	Azonal Vegetation	Inland Saline Vegetation	Not protected
Bushmanland Vloere	0.211000000000000	AZi 5	Least threatened	Azonal Vegetation	Inland Saline Vegetation	Not protected
Bushmanland Vloere	0.476500000000000	AZi 5	Least threatened	Azonal Vegetation	Inland Saline Vegetation	Not protected
Bushmanland Vloere	1.051800000000000	AZi 5	Least threatened	Azonal Vegetation	Inland Saline Vegetation	Not protected
Bushmanland Vloere	1.219400000000000	AZi 5	Least threatened	Azonal Vegetation	Inland Saline Vegetation	Not protected
Bushmanland Vloere	0.449400000000000	AZi 5	Least threatened	Azonal Vegetation	Inland Saline Vegetation	Not protected
Bushmanland Vloere	1.347900000000000	AZi 5	Least threatened	Azonal Vegetation	Inland Saline Vegetation	Not protected
Bushmanland Vloere	9.480100000000000	AZi 5	Least threatened	Azonal Vegetation	Inland Saline Vegetation	Not protected
Bushmanland Vloere	0.316000000000000	AZi 5	Least threatened	Azonal Vegetation	Inland Saline Vegetation	Not protected
Bushmanland Vloere	0.229700000000000	AZi 5	Least threatened	Azonal Vegetation	Inland Saline Vegetation	Not protected
Bushmanland Vloere	0.196300000000000	AZi 5	Least threatened	Azonal Vegetation	Inland Saline Vegetation	Not protected
Bushmanland Vloere	1.374500000000000	AZi 5	Least threatened	Azonal Vegetation	Inland Saline Vegetation	Not protected
Bushmanland Vloere	0.506700000000000	AZi 5	Least threatened	Azonal Vegetation	Inland Saline Vegetation	Not protected
Bushmanland Vloere	0.199500000000000	AZi 5	Least threatened	Azonal Vegetation	Inland Saline Vegetation	Not protected
Bushmanland Vloere	1.062500000000000	AZi 5	Least threatened	Azonal Vegetation	Inland Saline Vegetation	Not protected
Bushmanland Vloere	2.510100000000000	AZi 5	Least threatened	Azonal Vegetation	Inland Saline Vegetation	Not protected
Bushmanland Vloere	1.090000000000000	AZi 5	Least threatened	Azonal Vegetation	Inland Saline Vegetation	Not protected
Bushmanland Vloere	0.664600000000000	AZi 5	Least threatened	Azonal Vegetation	Inland Saline Vegetation	Not protected
Bushmanland Vloere	0.150400000000000	AZi 5	Least threatened	Azonal Vegetation	Inland Saline Vegetation	Not protected
Bushmanland Vloere	0.320200000000000	AZi 5	Least threatened	Azonal Vegetation	Inland Saline Vegetation	Not protected
Bushmanland Vloere	0.667800000000000	AZi 5	Least threatened	Azonal Vegetation	Inland Saline Vegetation	Not protected
Bushmanland Vloere	0.404900000000000	AZi 5	Least threatened	Azonal Vegetation	Inland Saline Vegetation	Not protected
Bushmanland Vloere	3.123500000000000	AZi 5	Least threatened	Azonal Vegetation	Inland Saline Vegetation	Not protected
Bushmanland Vloere	0.522700000000000	AZi 5	Least threatened	Azonal Vegetation	Inland Saline Vegetation	Not protected
Bushmanland Vloere	0.791200000000000	AZi 5	Least threatened	Azonal Vegetation	Inland Saline Vegetation	Not protected
Bushmanland Vloere	0.211300000000000	AZi 5	Least threatened	Azonal Vegetation	Inland Saline Vegetation	Not protected
Bushmanland Vloere	0.403200000000000	AZi 5	Least threatened	Azonal Vegetation	Inland Saline Vegetation	Not protected
Bushmanland Vloere	0.270800000000000	AZi 5	Least threatened	Azonal Vegetation	Inland Saline Vegetation	Not protected
Bushmanland Vloere	0.987800000000000	AZi 5	Least threatened	Azonal Vegetation	Inland Saline Vegetation	Not protected
Bushmanland Vloere	0.226300000000000	AZi 5	Least threatened	Azonal Vegetation	Inland Saline Vegetation	Not protected
Bushmanland Vloere	5.262300000000000	AZi 5	Least threatened	Azonal Vegetation	Inland Saline Vegetation	Not protected
Bushmanland Vloere	0.182500000000000	AZi 5	Least threatened	Azonal Vegetation	Inland Saline Vegetation	Not protected
Bushmanland Vloere	2.459700000000000	AZi 5	Least threatened	Azonal Vegetation	Inland Saline Vegetation	Not protected
Bushmanland Vloere	0.329000000000000	AZi 5	Least threatened	Azonal Vegetation	Inland Saline Vegetation	Not protected
Bushmanland Vloere	0.427100000000000	AZi 5	Least threatened	Azonal Vegetation	Inland Saline Vegetation	Not protected
Bushmanland Vloere	0.225400000000000	AZi 5	Least threatened	Azonal Vegetation	Inland Saline Vegetation	Not protected
Bushmanland Vloere	0.346100000000000	AZi 5	Least threatened	Azonal Vegetation	Inland Saline Vegetation	Not protected
Bushmanland Vloere	8.584700000000000	AZi 5	Least threatened	Azonal Vegetation	Inland Saline Vegetation	Not protected
Bushmanland Vloere	1.693400000000000	AZi 5	Least threatened	Azonal Vegetation	Inland Saline Vegetation	Not protected
Bushmanland Vloere	0.255900000000000	AZi 5	Least threatened	Azonal Vegetation	Inland Saline Vegetation	Not protected
Bushmanland Vloere	0.216300000000000	AZi 5	Least threatened	Azonal Vegetation	Inland Saline Vegetation	Not protected
Bushmanland Vloere	3.731300000000000	AZi 5	Least threatened	Azonal Vegetation	Inland Saline Vegetation	Not protected
Bushmanland Vloere	0.387700000000000	AZi 5	Least threatened	Azonal Vegetation	Inland Saline Vegetation	Not protected
Bushmanland Vloere	0.195800000000000	AZi 5	Least threatened	Azonal Vegetation	Inland Saline Vegetation	Not protected
Bushmanland Vloere	0.446300000000000	AZi 5	Least threatened	Azonal Vegetation	Inland Saline Vegetation	Not protected
Bushmanland Vloere	0.506200000000000	AZi 5	Least threatened	Azonal Vegetation	Inland Saline Vegetation	Not protected
Bushmanland Vloere	0.558800000000000	AZi 5	Least threatened	Azonal Vegetation	Inland Saline Vegetation	Not protected
Bushmanland Vloere	0.189300000000000	AZi 5	Least threatened	Azonal Vegetation	Inland Saline Vegetation	Not protected
Bushmanland Vloere	1.186100000000000	AZi 5	Least threatened	Azonal Vegetation	Inland Saline Vegetation	Not protected
Bushmanland Vloere	0.303700000000000	AZi 5	Least threatened	Azonal Vegetation	Inland Saline Vegetation	Not protected
Bushmanland Vloere	0.850100000000000	AZi 5	Least threatened	Azonal Vegetation	Inland Saline Vegetation	Not protected
Bushmanland Vloere	2.101600000000000	AZi 5	Least threatened	Azonal Vegetation	Inland Saline Vegetation	Not protected
Bushmanland Vloere	1.263100000000000	AZi 5	Least threatened	Azonal Vegetation	Inland Saline Vegetation	Not protected
Bushmanland Vloere	1803.493699999999990	AZi 5	Least threatened	Azonal Vegetation	Inland Saline Vegetation	Not protected
Bushmanland Vloere	0.243900000000000	AZi 5	Least threatened	Azonal Vegetation	Inland Saline Vegetation	Not protected
Bushmanland Vloere	0.456700000000000	AZi 5	Least threatened	Azonal Vegetation	Inland Saline Vegetation	Not protected
Bushmanland Vloere	0.188700000000000	AZi 5	Least threatened	Azonal Vegetation	Inland Saline Vegetation	Not protected
Bushmanland Vloere	0.369000000000000	AZi 5	Least threatened	Azonal Vegetation	Inland Saline Vegetation	Not protected
Bushmanland Vloere	0.177800000000000	AZi 5	Least threatened	Azonal Vegetation	Inland Saline Vegetation	Not protected
Bushmanland Vloere	2.077600000000000	AZi 5	Least threatened	Azonal Vegetation	Inland Saline Vegetation	Not protected
Bushmanland Vloere	0.221100000000000	AZi 5	Least threatened	Azonal Vegetation	Inland Saline Vegetation	Not protected
Bushmanland Vloere	0.186200000000000	AZi 5	Least threatened	Azonal Vegetation	Inland Saline Vegetation	Not protected
Bushmanland Vloere	0.220300000000000	AZi 5	Least threatened	Azonal Vegetation	Inland Saline Vegetation	Not protected
Bushmanland Vloere	0.304600000000000	AZi 5	Least threatened	Azonal Vegetation	Inland Saline Vegetation	Not protected
Bushmanland Vloere	0.562100000000000	AZi 5	Least threatened	Azonal Vegetation	Inland Saline Vegetation	Not protected
Bushmanland Vloere	51.766599999999997	AZi 5	Least threatened	Azonal Vegetation	Inland Saline Vegetation	Not protected
Bushmanland Vloere	0.286200000000000	AZi 5	Least threatened	Azonal Vegetation	Inland Saline Vegetation	Not protected
Bushmanland Vloere	0.343000000000000	AZi 5	Least threatened	Azonal Vegetation	Inland Saline Vegetation	Not protected
Bushmanland Vloere	0.364300000000000	AZi 5	Least threatened	Azonal Vegetation	Inland Saline Vegetation	Not protected
Bushmanland Vloere	1.112900000000000	AZi 5	Least threatened	Azonal Vegetation	Inland Saline Vegetation	Not protected
Bushmanland Vloere	0.421600000000000	AZi 5	Least threatened	Azonal Vegetation	Inland Saline Vegetation	Not protected
Bushmanland Vloere	0.290500000000000	AZi 5	Least threatened	Azonal Vegetation	Inland Saline Vegetation	Not protected
Bushmanland Vloere	0.939600000000000	AZi 5	Least threatened	Azonal Vegetation	Inland Saline Vegetation	Not protected
Bushmanland Vloere	0.433800000000000	AZi 5	Least threatened	Azonal Vegetation	Inland Saline Vegetation	Not protected
Bushmanland Vloere	0.187300000000000	AZi 5	Least threatened	Azonal Vegetation	Inland Saline Vegetation	Not protected
Bushmanland Vloere	0.380000000000000	AZi 5	Least threatened	Azonal Vegetation	Inland Saline Vegetation	Not protected
Bushmanland Vloere	0.484600000000000	AZi 5	Least threatened	Azonal Vegetation	Inland Saline Vegetation	Not protected
Bushmanland Vloere	0.614600000000000	AZi 5	Least threatened	Azonal Vegetation	Inland Saline Vegetation	Not protected
Bushmanland Vloere	1.252900000000000	AZi 5	Least threatened	Azonal Vegetation	Inland Saline Vegetation	Not protected
Bushmanland Vloere	0.228400000000000	AZi 5	Least threatened	Azonal Vegetation	Inland Saline Vegetation	Not protected
Bushmanland Vloere	0.289800000000000	AZi 5	Least threatened	Azonal Vegetation	Inland Saline Vegetation	Not protected
Bushmanland Vloere	0.288600000000000	AZi 5	Least threatened	Azonal Vegetation	Inland Saline Vegetation	Not protected
Bushmanland Vloere	3.028900000000000	AZi 5	Least threatened	Azonal Vegetation	Inland Saline Vegetation	Not protected
Bushmanland Vloere	0.230900000000000	AZi 5	Least threatened	Azonal Vegetation	Inland Saline Vegetation	Not protected
Bushmanland Vloere	2.074400000000000	AZi 5	Least threatened	Azonal Vegetation	Inland Saline Vegetation	Not protected
Bushmanland Vloere	0.199400000000000	AZi 5	Least threatened	Azonal Vegetation	Inland Saline Vegetation	Not protected
Bushmanland Vloere	0.444500000000000	AZi 5	Least threatened	Azonal Vegetation	Inland Saline Vegetation	Not protected
Bushmanland Vloere	0.317800000000000	AZi 5	Least threatened	Azonal Vegetation	Inland Saline Vegetation	Not protected
Bushmanland Vloere	0.218200000000000	AZi 5	Least threatened	Azonal Vegetation	Inland Saline Vegetation	Not protected
Bushmanland Vloere	0.434200000000000	AZi 5	Least threatened	Azonal Vegetation	Inland Saline Vegetation	Not protected
Bushmanland Vloere	0.197000000000000	AZi 5	Least threatened	Azonal Vegetation	Inland Saline Vegetation	Not protected
Bushmanland Vloere	0.426300000000000	AZi 5	Least threatened	Azonal Vegetation	Inland Saline Vegetation	Not protected
Bushmanland Vloere	0.354600000000000	AZi 5	Least threatened	Azonal Vegetation	Inland Saline Vegetation	Not protected
Bushmanland Vloere	0.224100000000000	AZi 5	Least threatened	Azonal Vegetation	Inland Saline Vegetation	Not protected
Bushmanland Vloere	0.232300000000000	AZi 5	Least threatened	Azonal Vegetation	Inland Saline Vegetation	Not protected
Bushmanland Vloere	0.880800000000000	AZi 5	Least threatened	Azonal Vegetation	Inland Saline Vegetation	Not protected
Bushmanland Vloere	0.391600000000000	AZi 5	Least threatened	Azonal Vegetation	Inland Saline Vegetation	Not protected
Bushmanland Vloere	0.261200000000000	AZi 5	Least threatened	Azonal Vegetation	Inland Saline Vegetation	Not protected
Bushmanland Vloere	0.560900000000000	AZi 5	Least threatened	Azonal Vegetation	Inland Saline Vegetation	Not protected
Bushmanland Vloere	0.370000000000000	AZi 5	Least threatened	Azonal Vegetation	Inland Saline Vegetation	Not protected
Bushmanland Vloere	1.366500000000000	AZi 5	Least threatened	Azonal Vegetation	Inland Saline Vegetation	Not protected
Bushmanland Vloere	10.047800000000001	AZi 5	Least threatened	Azonal Vegetation	Inland Saline Vegetation	Not protected
Bushmanland Vloere	0.179300000000000	AZi 5	Least threatened	Azonal Vegetation	Inland Saline Vegetation	Not protected
Bushmanland Vloere	1.037100000000000	AZi 5	Least threatened	Azonal Vegetation	Inland Saline Vegetation	Not protected
Bushmanland Vloere	2.324400000000000	AZi 5	Least threatened	Azonal Vegetation	Inland Saline Vegetation	Not protected
Bushmanland Vloere	641.248900000000049	AZi 5	Least threatened	Azonal Vegetation	Inland Saline Vegetation	Not protected
Bushmanland Vloere	0.289500000000000	AZi 5	Least threatened	Azonal Vegetation	Inland Saline Vegetation	Not protected
Bushmanland Vloere	0.330000000000000	AZi 5	Least threatened	Azonal Vegetation	Inland Saline Vegetation	Not protected
Bushmanland Vloere	0.180800000000000	AZi 5	Least threatened	Azonal Vegetation	Inland Saline Vegetation	Not protected
Bushmanland Vloere	0.246900000000000	AZi 5	Least threatened	Azonal Vegetation	Inland Saline Vegetation	Not protected
Bushmanland Vloere	0.281500000000000	AZi 5	Least threatened	Azonal Vegetation	Inland Saline Vegetation	Not protected
Bushmanland Vloere	0.180200000000000	AZi 5	Least threatened	Azonal Vegetation	Inland Saline Vegetation	Not protected
Bushmanland Vloere	0.214400000000000	AZi 5	Least threatened	Azonal Vegetation	Inland Saline Vegetation	Not protected
Bushmanland Vloere	0.253100000000000	AZi 5	Least threatened	Azonal Vegetation	Inland Saline Vegetation	Not protected
Bushmanland Vloere	0.973900000000000	AZi 5	Least threatened	Azonal Vegetation	Inland Saline Vegetation	Not protected
Bushmanland Vloere	15.391500000000001	AZi 5	Least threatened	Azonal Vegetation	Inland Saline Vegetation	Not protected
Bushmanland Vloere	2.228900000000000	AZi 5	Least threatened	Azonal Vegetation	Inland Saline Vegetation	Not protected
Bushmanland Vloere	0.338700000000000	AZi 5	Least threatened	Azonal Vegetation	Inland Saline Vegetation	Not protected
Bushmanland Vloere	0.412200000000000	AZi 5	Least threatened	Azonal Vegetation	Inland Saline Vegetation	Not protected
Bushmanland Vloere	0.181200000000000	AZi 5	Least threatened	Azonal Vegetation	Inland Saline Vegetation	Not protected
Bushmanland Vloere	0.381400000000000	AZi 5	Least threatened	Azonal Vegetation	Inland Saline Vegetation	Not protected
Bushmanland Vloere	0.908400000000000	AZi 5	Least threatened	Azonal Vegetation	Inland Saline Vegetation	Not protected
Bushmanland Vloere	0.834100000000000	AZi 5	Least threatened	Azonal Vegetation	Inland Saline Vegetation	Not protected
Bushmanland Vloere	0.374600000000000	AZi 5	Least threatened	Azonal Vegetation	Inland Saline Vegetation	Not protected
Bushmanland Vloere	0.182300000000000	AZi 5	Least threatened	Azonal Vegetation	Inland Saline Vegetation	Not protected
Bushmanland Vloere	0.205700000000000	AZi 5	Least threatened	Azonal Vegetation	Inland Saline Vegetation	Not protected
Bushmanland Vloere	3.424900000000000	AZi 5	Least threatened	Azonal Vegetation	Inland Saline Vegetation	Not protected
Bushmanland Vloere	0.350200000000000	AZi 5	Least threatened	Azonal Vegetation	Inland Saline Vegetation	Not protected
Bushmanland Vloere	0.179300000000000	AZi 5	Least threatened	Azonal Vegetation	Inland Saline Vegetation	Not protected
Bushmanland Vloere	1.153700000000000	AZi 5	Least threatened	Azonal Vegetation	Inland Saline Vegetation	Not protected
Bushmanland Vloere	0.215600000000000	AZi 5	Least threatened	Azonal Vegetation	Inland Saline Vegetation	Not protected
Bushmanland Vloere	0.389500000000000	AZi 5	Least threatened	Azonal Vegetation	Inland Saline Vegetation	Not protected
Bushmanland Vloere	0.618600000000000	AZi 5	Least threatened	Azonal Vegetation	Inland Saline Vegetation	Not protected
Bushmanland Vloere	0.760200000000000	AZi 5	Least threatened	Azonal Vegetation	Inland Saline Vegetation	Not protected
Bushmanland Vloere	0.671900000000000	AZi 5	Least threatened	Azonal Vegetation	Inland Saline Vegetation	Not protected
Bushmanland Vloere	0.396900000000000	AZi 5	Least threatened	Azonal Vegetation	Inland Saline Vegetation	Not protected
Bushmanland Vloere	0.233700000000000	AZi 5	Least threatened	Azonal Vegetation	Inland Saline Vegetation	Not protected
Bushmanland Vloere	3.585100000000000	AZi 5	Least threatened	Azonal Vegetation	Inland Saline Vegetation	Not protected
Bushmanland Vloere	4.115700000000000	AZi 5	Least threatened	Azonal Vegetation	Inland Saline Vegetation	Not protected
Bushmanland Vloere	0.177000000000000	AZi 5	Least threatened	Azonal Vegetation	Inland Saline Vegetation	Not protected
Bushmanland Vloere	0.768600000000000	AZi 5	Least threatened	Azonal Vegetation	Inland Saline Vegetation	Not protected
Bushmanland Vloere	0.335300000000000	AZi 5	Least threatened	Azonal Vegetation	Inland Saline Vegetation	Not protected
Bushmanland Vloere	0.333000000000000	AZi 5	Least threatened	Azonal Vegetation	Inland Saline Vegetation	Not protected
Bushmanland Vloere	0.539700000000000	AZi 5	Least threatened	Azonal Vegetation	Inland Saline Vegetation	Not protected
Bushmanland Vloere	0.218100000000000	AZi 5	Least threatened	Azonal Vegetation	Inland Saline Vegetation	Not protected
Bushmanland Vloere	0.194700000000000	AZi 5	Least threatened	Azonal Vegetation	Inland Saline Vegetation	Not protected
Bushmanland Vloere	1.332200000000000	AZi 5	Least threatened	Azonal Vegetation	Inland Saline Vegetation	Not protected
Bushmanland Vloere	1.990100000000000	AZi 5	Least threatened	Azonal Vegetation	Inland Saline Vegetation	Not protected
Bushmanland Vloere	0.363900000000000	AZi 5	Least threatened	Azonal Vegetation	Inland Saline Vegetation	Not protected
Bushmanland Vloere	0.496300000000000	AZi 5	Least threatened	Azonal Vegetation	Inland Saline Vegetation	Not protected
Bushmanland Vloere	0.199200000000000	AZi 5	Least threatened	Azonal Vegetation	Inland Saline Vegetation	Not protected
Bushmanland Vloere	2.739700000000000	AZi 5	Least threatened	Azonal Vegetation	Inland Saline Vegetation	Not protected
Bushmanland Vloere	0.402400000000000	AZi 5	Least threatened	Azonal Vegetation	Inland Saline Vegetation	Not protected
Bushmanland Vloere	0.175300000000000	AZi 5	Least threatened	Azonal Vegetation	Inland Saline Vegetation	Not protected
Bushmanland Vloere	0.688200000000000	AZi 5	Least threatened	Azonal Vegetation	Inland Saline Vegetation	Not protected
Bushmanland Vloere	0.677300000000000	AZi 5	Least threatened	Azonal Vegetation	Inland Saline Vegetation	Not protected
Bushmanland Vloere	3.857900000000000	AZi 5	Least threatened	Azonal Vegetation	Inland Saline Vegetation	Not protected
Bushmanland Vloere	0.254500000000000	AZi 5	Least threatened	Azonal Vegetation	Inland Saline Vegetation	Not protected
Bushmanland Vloere	0.857600000000000	AZi 5	Least threatened	Azonal Vegetation	Inland Saline Vegetation	Not protected
Bushmanland Vloere	0.213400000000000	AZi 5	Least threatened	Azonal Vegetation	Inland Saline Vegetation	Not protected
Bushmanland Vloere	2.826200000000000	AZi 5	Least threatened	Azonal Vegetation	Inland Saline Vegetation	Not protected
Bushmanland Vloere	0.451000000000000	AZi 5	Least threatened	Azonal Vegetation	Inland Saline Vegetation	Not protected
Bushmanland Vloere	0.404700000000000	AZi 5	Least threatened	Azonal Vegetation	Inland Saline Vegetation	Not protected
Bushmanland Vloere	0.198000000000000	AZi 5	Least threatened	Azonal Vegetation	Inland Saline Vegetation	Not protected
Bushmanland Vloere	0.497800000000000	AZi 5	Least threatened	Azonal Vegetation	Inland Saline Vegetation	Not protected
Bushmanland Vloere	0.259500000000000	AZi 5	Least threatened	Azonal Vegetation	Inland Saline Vegetation	Not protected
Bushmanland Vloere	0.274500000000000	AZi 5	Least threatened	Azonal Vegetation	Inland Saline Vegetation	Not protected
Bushmanland Vloere	1.043200000000000	AZi 5	Least threatened	Azonal Vegetation	Inland Saline Vegetation	Not protected
Bushmanland Vloere	0.254600000000000	AZi 5	Least threatened	Azonal Vegetation	Inland Saline Vegetation	Not protected
Bushmanland Vloere	2.727300000000000	AZi 5	Least threatened	Azonal Vegetation	Inland Saline Vegetation	Not protected
Bushmanland Vloere	0.507900000000000	AZi 5	Least threatened	Azonal Vegetation	Inland Saline Vegetation	Not protected
Bushmanland Vloere	0.309300000000000	AZi 5	Least threatened	Azonal Vegetation	Inland Saline Vegetation	Not protected
Bushmanland Vloere	1.318600000000000	AZi 5	Least threatened	Azonal Vegetation	Inland Saline Vegetation	Not protected
Bushmanland Vloere	0.210500000000000	AZi 5	Least threatened	Azonal Vegetation	Inland Saline Vegetation	Not protected
Bushmanland Vloere	1.289200000000000	AZi 5	Least threatened	Azonal Vegetation	Inland Saline Vegetation	Not protected
Bushmanland Vloere	0.191400000000000	AZi 5	Least threatened	Azonal Vegetation	Inland Saline Vegetation	Not protected
Bushmanland Vloere	0.371300000000000	AZi 5	Least threatened	Azonal Vegetation	Inland Saline Vegetation	Not protected
Bushmanland Vloere	2.012200000000000	AZi 5	Least threatened	Azonal Vegetation	Inland Saline Vegetation	Not protected
Bushmanland Vloere	0.193500000000000	AZi 5	Least threatened	Azonal Vegetation	Inland Saline Vegetation	Not protected
Bushmanland Vloere	0.705000000000000	AZi 5	Least threatened	Azonal Vegetation	Inland Saline Vegetation	Not protected
Bushmanland Vloere	0.615600000000000	AZi 5	Least threatened	Azonal Vegetation	Inland Saline Vegetation	Not protected
Bushmanland Vloere	0.343400000000000	AZi 5	Least threatened	Azonal Vegetation	Inland Saline Vegetation	Not protected
Bushmanland Vloere	0.834800000000000	AZi 5	Least threatened	Azonal Vegetation	Inland Saline Vegetation	Not protected
Bushmanland Vloere	0.740600000000000	AZi 5	Least threatened	Azonal Vegetation	Inland Saline Vegetation	Not protected
Bushmanland Vloere	0.201000000000000	AZi 5	Least threatened	Azonal Vegetation	Inland Saline Vegetation	Not protected
Bushmanland Vloere	0.233000000000000	AZi 5	Least threatened	Azonal Vegetation	Inland Saline Vegetation	Not protected
Bushmanland Vloere	0.212900000000000	AZi 5	Least threatened	Azonal Vegetation	Inland Saline Vegetation	Not protected
Bushmanland Vloere	0.211200000000000	AZi 5	Least threatened	Azonal Vegetation	Inland Saline Vegetation	Not protected
Bushmanland Vloere	0.263300000000000	AZi 5	Least threatened	Azonal Vegetation	Inland Saline Vegetation	Not protected
Bushmanland Vloere	2.808200000000000	AZi 5	Least threatened	Azonal Vegetation	Inland Saline Vegetation	Not protected
Bushmanland Vloere	0.556000000000000	AZi 5	Least threatened	Azonal Vegetation	Inland Saline Vegetation	Not protected
Bushmanland Vloere	0.435500000000000	AZi 5	Least threatened	Azonal Vegetation	Inland Saline Vegetation	Not protected
Bushmanland Vloere	0.480700000000000	AZi 5	Least threatened	Azonal Vegetation	Inland Saline Vegetation	Not protected
Bushmanland Vloere	0.126500000000000	AZi 5	Least threatened	Azonal Vegetation	Inland Saline Vegetation	Not protected
Bushmanland Vloere	84.259000000000000	AZi 5	Least threatened	Azonal Vegetation	Inland Saline Vegetation	Not protected
Bushmanland Vloere	3.420700000000000	AZi 5	Least threatened	Azonal Vegetation	Inland Saline Vegetation	Not protected
Bushmanland Vloere	0.371400000000000	AZi 5	Least threatened	Azonal Vegetation	Inland Saline Vegetation	Not protected
Bushmanland Vloere	0.410500000000000	AZi 5	Least threatened	Azonal Vegetation	Inland Saline Vegetation	Not protected
Bushmanland Vloere	0.420100000000000	AZi 5	Least threatened	Azonal Vegetation	Inland Saline Vegetation	Not protected
Bushmanland Vloere	0.242300000000000	AZi 5	Least threatened	Azonal Vegetation	Inland Saline Vegetation	Not protected
Bushmanland Vloere	0.180100000000000	AZi 5	Least threatened	Azonal Vegetation	Inland Saline Vegetation	Not protected
Bushmanland Vloere	0.365600000000000	AZi 5	Least threatened	Azonal Vegetation	Inland Saline Vegetation	Not protected
Bushmanland Vloere	1.014000000000000	AZi 5	Least threatened	Azonal Vegetation	Inland Saline Vegetation	Not protected
Bushmanland Vloere	0.182600000000000	AZi 5	Least threatened	Azonal Vegetation	Inland Saline Vegetation	Not protected
Bushmanland Vloere	2.520900000000000	AZi 5	Least threatened	Azonal Vegetation	Inland Saline Vegetation	Not protected
Bushmanland Vloere	0.707200000000000	AZi 5	Least threatened	Azonal Vegetation	Inland Saline Vegetation	Not protected
Bushmanland Vloere	9.158600000000000	AZi 5	Least threatened	Azonal Vegetation	Inland Saline Vegetation	Not protected
Bushmanland Vloere	0.530100000000000	AZi 5	Least threatened	Azonal Vegetation	Inland Saline Vegetation	Not protected
Bushmanland Vloere	0.438200000000000	AZi 5	Least threatened	Azonal Vegetation	Inland Saline Vegetation	Not protected
Bushmanland Vloere	0.201200000000000	AZi 5	Least threatened	Azonal Vegetation	Inland Saline Vegetation	Not protected
Bushmanland Vloere	0.195500000000000	AZi 5	Least threatened	Azonal Vegetation	Inland Saline Vegetation	Not protected
Bushmanland Vloere	1.894800000000000	AZi 5	Least threatened	Azonal Vegetation	Inland Saline Vegetation	Not protected
Bushmanland Vloere	1.584000000000000	AZi 5	Least threatened	Azonal Vegetation	Inland Saline Vegetation	Not protected
Bushmanland Vloere	0.520700000000000	AZi 5	Least threatened	Azonal Vegetation	Inland Saline Vegetation	Not protected
[truncated: 15,797 more rows]

## Sheet: TC
Vegetation type	Polygon square kilometres (POLYSQKM)	Book code	Conservation status	Biome	Bioregion	Protection status
Musina Mopane Bushveld	8728.73	SVmp 1	Least threatened	Savanna Biome	Mopane Bioregion	Poorly protected
Makuleke Sandy Bushveld	1897.76	SVl 1	Vulnerable	Savanna Biome	Lowveld Bioregion	Well protected
Limpopo Sweet Bushveld	11377	SVcb 19	Least threatened	Savanna Biome	Central Bushveld Bioregion	Hardly protected
Soutpansberg Mountain Bushveld	3776.31	SVcb 21	Vulnerable	Savanna Biome	Central Bushveld Bioregion	Poorly protected
VhaVenda Miombo	0.3341	SVcb 22	See text	Savanna Biome	Central Bushveld Bioregion	Not protected
Ironwood Dry Forest	4.9598	FOz 9	Critically endangered	Forests	Zonal & Intrazonal Forests	Well protected
Ironwood Dry Forest	0.1778	FOz 9	Critically endangered	Forests	Zonal & Intrazonal Forests	Well protected
Roodeberg Bushveld	6496.46	SVcb 18	Least threatened	Savanna Biome	Central Bushveld Bioregion	Poorly protected
Makhado Sweet Bushveld	10107.2	SVcb 20	Vulnerable	Savanna Biome	Central Bushveld Bioregion	Hardly protected
Limpopo Ridge Bushveld	1.3456	SVmp 2	Least threatened	Savanna Biome	Mopane Bioregion	Moderately protected
Northern Mistbelt Forest	0.2877	FOz 4	Least threatened	Forests	Zonal & Intrazonal Forests	Poorly protected
Northern Mistbelt Forest	1.5108	FOz 4	Least threatened	Forests	Zonal & Intrazonal Forests	Poorly protected
Northern Mistbelt Forest	0.2998	FOz 4	Least threatened	Forests	Zonal & Intrazonal Forests	Poorly protected
Northern Mistbelt Forest	0.2347	FOz 4	Least threatened	Forests	Zonal & Intrazonal Forests	Poorly protected
Northern Mistbelt Forest	0.3074	FOz 4	Least threatened	Forests	Zonal & Intrazonal Forests	Poorly protected
Northern Mistbelt Forest	0.485	FOz 4	Least threatened	Forests	Zonal & Intrazonal Forests	Poorly protected
Soutpansberg Summit Sourveld	6.2425	Gm 28	Least threatened	Grassland Biome	Mesic Highveld Grassland Bioregion	Moderately protected
Soutpansberg Summit Sourveld	0.6432	Gm 28	Least threatened	Grassland Biome	Mesic Highveld Grassland Bioregion	Moderately protected
Subtropical Salt Pans	1.5589	AZi 11	Least threatened	Azonal Vegetation	Inland Saline Vegetation	Moderately protected
Soutpansberg Summit Sourveld	0.9149	Gm 28	Least threatened	Grassland Biome	Mesic Highveld Grassland Bioregion	Moderately protected
Northern Mistbelt Forest	0.1116	FOz 4	Least threatened	Forests	Zonal & Intrazonal Forests	Poorly protected
Soutpansberg Summit Sourveld	1.3157	Gm 28	Least threatened	Grassland Biome	Mesic Highveld Grassland Bioregion	Moderately protected
Northern Mistbelt Forest	0.9791	FOz 4	Least threatened	Forests	Zonal & Intrazonal Forests	Poorly protected
Northern Mistbelt Forest	0.4406	FOz 4	Least threatened	Forests	Zonal & Intrazonal Forests	Poorly protected
Northern Mistbelt Forest	0.6363	FOz 4	Least threatened	Forests	Zonal & Intrazonal Forests	Poorly protected
Northern Mistbelt Forest	0.4118	FOz 4	Least threatened	Forests	Zonal & Intrazonal Forests	Poorly protected
Northern Mistbelt Forest	0.3936	FOz 4	Least threatened	Forests	Zonal & Intrazonal Forests	Poorly protected
Northern Mistbelt Forest	0.5284	FOz 4	Least threatened	Forests	Zonal & Intrazonal Forests	Poorly protected
Soutpansberg Summit Sourveld	5.1466	Gm 28	Least threatened	Grassland Biome	Mesic Highveld Grassland Bioregion	Moderately protected
Tzaneen Sour Bushveld	3344.07	SVl 8	Endangered	Savanna Biome	Lowveld Bioregion	Poorly protected
Northern Mistbelt Forest	4.4026	FOz 4	Least threatened	Forests	Zonal & Intrazonal Forests	Poorly protected
Northern Mistbelt Forest	4.4982	FOz 4	Least threatened	Forests	Zonal & Intrazonal Forests	Poorly protected
Soutpansberg Summit Sourveld	11.8454	Gm 28	Least threatened	Grassland Biome	Mesic Highveld Grassland Bioregion	Moderately protected
Northern Mistbelt Forest	0.2598	FOz 4	Least threatened	Forests	Zonal & Intrazonal Forests	Poorly protected
Northern Mistbelt Forest	0.2761	FOz 4	Least threatened	Forests	Zonal & Intrazonal Forests	Poorly protected
Northern Mistbelt Forest	0.2353	FOz 4	Least threatened	Forests	Zonal & Intrazonal Forests	Poorly protected
Northern Mistbelt Forest	0.5942	FOz 4	Least threatened	Forests	Zonal & Intrazonal Forests	Poorly protected
Northern Mistbelt Forest	0.2468	FOz 4	Least threatened	Forests	Zonal & Intrazonal Forests	Poorly protected
Soutpansberg Mountain Bushveld	0.1284	SVcb 21	Vulnerable	Savanna Biome	Central Bushveld Bioregion	Poorly protected
Soutpansberg Mountain Bushveld	0.9456	SVcb 21	Vulnerable	Savanna Biome	Central Bushveld Bioregion	Poorly protected
Soutpansberg Mountain Bushveld	0.4859	SVcb 21	Vulnerable	Savanna Biome	Central Bushveld Bioregion	Poorly protected
Northern Mistbelt Forest	1.4837	FOz 4	Least threatened	Forests	Zonal & Intrazonal Forests	Poorly protected
Northern Mistbelt Forest	1.2775	FOz 4	Least threatened	Forests	Zonal & Intrazonal Forests	Poorly protected
Soutpansberg Mountain Bushveld	0.0791	SVcb 21	Vulnerable	Savanna Biome	Central Bushveld Bioregion	Poorly protected
Northern Mistbelt Forest	0.3316	FOz 4	Least threatened	Forests	Zonal & Intrazonal Forests	Poorly protected
Soutpansberg Mountain Bushveld	0.6242	SVcb 21	Vulnerable	Savanna Biome	Central Bushveld Bioregion	Poorly protected
Soutpansberg Mountain Bushveld	183.677	SVcb 21	Vulnerable	Savanna Biome	Central Bushveld Bioregion	Poorly protected
Soutpansberg Summit Sourveld	1.5505	Gm 28	Least threatened	Grassland Biome	Mesic Highveld Grassland Bioregion	Moderately protected
Northern Mistbelt Forest	0.3326	FOz 4	Least threatened	Forests	Zonal & Intrazonal Forests	Poorly protected
Soutpansberg Summit Sourveld	0.0598	Gm 28	Least threatened	Grassland Biome	Mesic Highveld Grassland Bioregion	Moderately protected
Northern Mistbelt Forest	3.5874	FOz 4	Least threatened	Forests	Zonal & Intrazonal Forests	Poorly protected
Soutpansberg Mountain Bushveld	0.072	SVcb 21	Vulnerable	Savanna Biome	Central Bushveld Bioregion	Poorly protected
Northern Mistbelt Forest	0.0936	FOz 4	Least threatened	Forests	Zonal & Intrazonal Forests	Poorly protected
Northern Mistbelt Forest	0.3587	FOz 4	Least threatened	Forests	Zonal & Intrazonal Forests	Poorly protected
Northern Mistbelt Forest	1.8268	FOz 4	Least threatened	Forests	Zonal & Intrazonal Forests	Poorly protected
Soutpansberg Summit Sourveld	23.1308	Gm 28	Least threatened	Grassland Biome	Mesic Highveld Grassland Bioregion	Moderately protected
Northern Mistbelt Forest	1.884	FOz 4	Least threatened	Forests	Zonal & Intrazonal Forests	Poorly protected
Northern Mistbelt Forest	0.1639	FOz 4	Least threatened	Forests	Zonal & Intrazonal Forests	Poorly protected
Soutpansberg Mountain Bushveld	0.4178	SVcb 21	Vulnerable	Savanna Biome	Central Bushveld Bioregion	Poorly protected
Northern Mistbelt Forest	0.287	FOz 4	Least threatened	Forests	Zonal & Intrazonal Forests	Poorly protected
Northern Mistbelt Forest	1.1505	FOz 4	Least threatened	Forests	Zonal & Intrazonal Forests	Poorly protected
Northern Mistbelt Forest	0.2186	FOz 4	Least threatened	Forests	Zonal & Intrazonal Forests	Poorly protected
Northern Mistbelt Forest	0.2131	FOz 4	Least threatened	Forests	Zonal & Intrazonal Forests	Poorly protected
Northern Mistbelt Forest	0.2427	FOz 4	Least threatened	Forests	Zonal & Intrazonal Forests	Poorly protected
Soutpansberg Summit Sourveld	3.4071	Gm 28	Least threatened	Grassland Biome	Mesic Highveld Grassland Bioregion	Moderately protected
Northern Mistbelt Forest	0.0895	FOz 4	Least threatened	Forests	Zonal & Intrazonal Forests	Poorly protected
Soutpansberg Summit Sourveld	0.9839	Gm 28	Least threatened	Grassland Biome	Mesic Highveld Grassland Bioregion	Moderately protected
Northern Mistbelt Forest	0.2106	FOz 4	Least threatened	Forests	Zonal & Intrazonal Forests	Poorly protected
Northern Mistbelt Forest	7.9136	FOz 4	Least threatened	Forests	Zonal & Intrazonal Forests	Poorly protected
Northern Mistbelt Forest	2.2848	FOz 4	Least threatened	Forests	Zonal & Intrazonal Forests	Poorly protected
Soutpansberg Summit Sourveld	13.2028	Gm 28	Least threatened	Grassland Biome	Mesic Highveld Grassland Bioregion	Moderately protected
Northern Mistbelt Forest	1.014	FOz 4	Least threatened	Forests	Zonal & Intrazonal Forests	Poorly protected
Northern Mistbelt Forest	16.872	FOz 4	Least threatened	Forests	Zonal & Intrazonal Forests	Poorly protected
Northern Mistbelt Forest	0.129	FOz 4	Least threatened	Forests	Zonal & Intrazonal Forests	Poorly protected
Northern Mistbelt Forest	0.074	FOz 4	Least threatened	Forests	Zonal & Intrazonal Forests	Poorly protected
Northern Mistbelt Forest	0.0911	FOz 4	Least threatened	Forests	Zonal & Intrazonal Forests	Poorly protected
Soutpansberg Mountain Bushveld	0.3177	SVcb 21	Vulnerable	Savanna Biome	Central Bushveld Bioregion	Poorly protected
Northern Mistbelt Forest	1.2766	FOz 4	Least threatened	Forests	Zonal & Intrazonal Forests	Poorly protected
Northern Mistbelt Forest	0.4607	FOz 4	Least threatened	Forests	Zonal & Intrazonal Forests	Poorly protected
Northern Mistbelt Forest	1.3075	FOz 4	Least threatened	Forests	Zonal & Intrazonal Forests	Poorly protected
Northern Mistbelt Forest	2.2385	FOz 4	Least threatened	Forests	Zonal & Intrazonal Forests	Poorly protected
Northern Mistbelt Forest	0.1297	FOz 4	Least threatened	Forests	Zonal & Intrazonal Forests	Poorly protected
Northern Mistbelt Forest	0.2338	FOz 4	Least threatened	Forests	Zonal & Intrazonal Forests	Poorly protected
Soutpansberg Summit Sourveld	0.8144	Gm 28	Least threatened	Grassland Biome	Mesic Highveld Grassland Bioregion	Moderately protected
Northern Mistbelt Forest	0.3839	FOz 4	Least threatened	Forests	Zonal & Intrazonal Forests	Poorly protected
Soutpansberg Summit Sourveld	0.0993	Gm 28	Least threatened	Grassland Biome	Mesic Highveld Grassland Bioregion	Moderately protected
Northern Mistbelt Forest	1.2387	FOz 4	Least threatened	Forests	Zonal & Intrazonal Forests	Poorly protected
Northern Mistbelt Forest	0.4834	FOz 4	Least threatened	Forests	Zonal & Intrazonal Forests	Poorly protected
Soutpansberg Summit Sourveld	0.4435	Gm 28	Least threatened	Grassland Biome	Mesic Highveld Grassland Bioregion	Moderately protected
Soutpansberg Mountain Bushveld	0.559	SVcb 21	Vulnerable	Savanna Biome	Central Bushveld Bioregion	Poorly protected
Soutpansberg Mountain Bushveld	0.0733	SVcb 21	Vulnerable	Savanna Biome	Central Bushveld Bioregion	Poorly protected
Soutpansberg Summit Sourveld	0.4225	Gm 28	Least threatened	Grassland Biome	Mesic Highveld Grassland Bioregion	Moderately protected
Soutpansberg Summit Sourveld	2.0657	Gm 28	Least threatened	Grassland Biome	Mesic Highveld Grassland Bioregion	Moderately protected
Northern Mistbelt Forest	0.1974	FOz 4	Least threatened	Forests	Zonal & Intrazonal Forests	Poorly protected
Soutpansberg Summit Sourveld	6.4446	Gm 28	Least threatened	Grassland Biome	Mesic Highveld Grassland Bioregion	Moderately protected
Northern Mistbelt Forest	9.2941	FOz 4	Least threatened	Forests	Zonal & Intrazonal Forests	Poorly protected
Northern Mistbelt Forest	6.4482	FOz 4	Least threatened	Forests	Zonal & Intrazonal Forests	Poorly protected
Soutpansberg Summit Sourveld	0.932	Gm 28	Least threatened	Grassland Biome	Mesic Highveld Grassland Bioregion	Moderately protected
Northern Mistbelt Forest	0.2642	FOz 4	Least threatened	Forests	Zonal & Intrazonal Forests	Poorly protected
Northern Mistbelt Forest	0.3792	FOz 4	Least threatened	Forests	Zonal & Intrazonal Forests	Poorly protected
Soutpansberg Summit Sourveld	0.2871	Gm 28	Least threatened	Grassland Biome	Mesic Highveld Grassland Bioregion	Moderately protected
Northern Escarpment Afromontane Fynbos	0.1022	Gm 24	Least threatened	Grassland Biome	Mesic Highveld Grassland Bioregion	Well protected
Soutpansberg Summit Sourveld	1.4591	Gm 28	Least threatened	Grassland Biome	Mesic Highveld Grassland Bioregion	Moderately protected
Northern Mistbelt Forest	0.2125	FOz 4	Least threatened	Forests	Zonal & Intrazonal Forests	Poorly protected
Northern Escarpment Afromontane Fynbos	0.1535	Gm 24	Least threatened	Grassland Biome	Mesic Highveld Grassland Bioregion	Well protected
Northern Escarpment Afromontane Fynbos	0.2506	Gm 24	Least threatened	Grassland Biome	Mesic Highveld Grassland Bioregion	Well protected
Northern Escarpment Afromontane Fynbos	0.0908	Gm 24	Least threatened	Grassland Biome	Mesic Highveld Grassland Bioregion	Well protected
Soutpansberg Summit Sourveld	2.8822	Gm 28	Least threatened	Grassland Biome	Mesic Highveld Grassland Bioregion	Moderately protected
Soutpansberg Summit Sourveld	0.0658	Gm 28	Least threatened	Grassland Biome	Mesic Highveld Grassland Bioregion	Moderately protected
Soutpansberg Summit Sourveld	0.241	Gm 28	Least threatened	Grassland Biome	Mesic Highveld Grassland Bioregion	Moderately protected
Soutpansberg Summit Sourveld	0.1312	Gm 28	Least threatened	Grassland Biome	Mesic Highveld Grassland Bioregion	Moderately protected
Soutpansberg Summit Sourveld	0.0554	Gm 28	Least threatened	Grassland Biome	Mesic Highveld Grassland Bioregion	Moderately protected
Soutpansberg Summit Sourveld	0.1604	Gm 28	Least threatened	Grassland Biome	Mesic Highveld Grassland Bioregion	Moderately protected
Northern Mistbelt Forest	0.4239	FOz 4	Least threatened	Forests	Zonal & Intrazonal Forests	Poorly protected
Northern Mistbelt Forest	0.0658	FOz 4	Least threatened	Forests	Zonal & Intrazonal Forests	Poorly protected
Soutpansberg Summit Sourveld	1.2512	Gm 28	Least threatened	Grassland Biome	Mesic Highveld Grassland Bioregion	Moderately protected
Polokwane Plateau Bushveld	4444.4	SVcb 23	See text	Savanna Biome	Central Bushveld Bioregion	Poorly protected
Waterberg Mountain Bushveld	4398.37	SVcb 17	Least threatened	Savanna Biome	Central Bushveld Bioregion	Poorly protected
Western Sandy Bushveld	5596.87	SVcb 16	Least threatened	Savanna Biome	Central Bushveld Bioregion	Poorly protected
Central Sandy Bushveld	5471.57	SVcb 12	Vulnerable	Savanna Biome	Central Bushveld Bioregion	Poorly protected
Waterberg Mountain Bushveld	394.415	SVcb 17	Least threatened	Savanna Biome	Central Bushveld Bioregion	Poorly protected
Mamabolo Mountain Bushveld	54.1235	SVcb 24	Least threatened	Savanna Biome	Central Bushveld Bioregion	Poorly protected
Mamabolo Mountain Bushveld	13.2253	SVcb 24	Least threatened	Savanna Biome	Central Bushveld Bioregion	Poorly protected
Strydpoort Summit Sourveld	97.7284	Gm 27	Least threatened	Grassland Biome	Mesic Highveld Grassland Bioregion	Moderately protected
Mamabolo Mountain Bushveld	1.8443	SVcb 24	Least threatened	Savanna Biome	Central Bushveld Bioregion	Poorly protected
Mamabolo Mountain Bushveld	1.8807	SVcb 24	Least threatened	Savanna Biome	Central Bushveld Bioregion	Poorly protected
Mamabolo Mountain Bushveld	3.4911	SVcb 24	Least threatened	Savanna Biome	Central Bushveld Bioregion	Poorly protected
Mamabolo Mountain Bushveld	3.8884	SVcb 24	Least threatened	Savanna Biome	Central Bushveld Bioregion	Poorly protected
Waterberg-Magaliesberg Summit Sourveld	55.4205	Gm 29	Least threatened	Grassland Biome	Mesic Highveld Grassland Bioregion	Well protected
Mamabolo Mountain Bushveld	134.705	SVcb 24	Least threatened	Savanna Biome	Central Bushveld Bioregion	Poorly protected
Mamabolo Mountain Bushveld	0.5575	SVcb 24	Least threatened	Savanna Biome	Central Bushveld Bioregion	Poorly protected
Waterberg Mountain Bushveld	1595.4	SVcb 17	Least threatened	Savanna Biome	Central Bushveld Bioregion	Poorly protected
Poung Dolomite Mountain Bushveld	97.1771	SVcb 25	Least threatened	Savanna Biome	Central Bushveld Bioregion	Poorly protected
Waterberg Mountain Bushveld	2.4094	SVcb 17	Least threatened	Savanna Biome	Central Bushveld Bioregion	Poorly protected
Waterberg-Magaliesberg Summit Sourveld	2.8336	Gm 29	Least threatened	Grassland Biome	Mesic Highveld Grassland Bioregion	Well protected
Waterberg-Magaliesberg Summit Sourveld	0.5475	Gm 29	Least threatened	Grassland Biome	Mesic Highveld Grassland Bioregion	Well protected
Waterberg-Magaliesberg Summit Sourveld	3.6989	Gm 29	Least threatened	Grassland Biome	Mesic Highveld Grassland Bioregion	Well protected
Waterberg-Magaliesberg Summit Sourveld	0.3997	Gm 29	Least threatened	Grassland Biome	Mesic Highveld Grassland Bioregion	Well protected
Waterberg-Magaliesberg Summit Sourveld	1.6088	Gm 29	Least threatened	Grassland Biome	Mesic Highveld Grassland Bioregion	Well protected
Strydpoort Summit Sourveld	35.2781	Gm 27	Least threatened	Grassland Biome	Mesic Highveld Grassland Bioregion	Moderately protected
Waterberg-Magaliesberg Summit Sourveld	3.5952	Gm 29	Least threatened	Grassland Biome	Mesic Highveld Grassland Bioregion	Well protected
Mamabolo Mountain Bushveld	2.0383	SVcb 24	Least threatened	Savanna Biome	Central Bushveld Bioregion	Poorly protected
Waterberg-Magaliesberg Summit Sourveld	21.633	Gm 29	Least threatened	Grassland Biome	Mesic Highveld Grassland Bioregion	Well protected
Strydpoort Summit Sourveld	7.2968	Gm 27	Least threatened	Grassland Biome	Mesic Highveld Grassland Bioregion	Moderately protected
Waterberg-Magaliesberg Summit Sourveld	2.1158	Gm 29	Least threatened	Grassland Biome	Mesic Highveld Grassland Bioregion	Well protected
Mamabolo Mountain Bushveld	12.6226	SVcb 24	Least threatened	Savanna Biome	Central Bushveld Bioregion	Poorly protected
Subtropical Freshwater Wetlands	6.0306	AZf 6	Least threatened	Azonal Vegetation	Freshwater Wetlands	Well protected
Waterberg-Magaliesberg Summit Sourveld	27.0208	Gm 29	Least threatened	Grassland Biome	Mesic Highveld Grassland Bioregion	Well protected
Waterberg-Magaliesberg Summit Sourveld	15.7487	Gm 29	Least threatened	Grassland Biome	Mesic Highveld Grassland Bioregion	Well protected
Springbokvlakte Thornveld	8761.16	SVcb 15	Endangered	Savanna Biome	Central Bushveld Bioregion	Hardly protected
Strydpoort Summit Sourveld	1.4676	Gm 27	Least threatened	Grassland Biome	Mesic Highveld Grassland Bioregion	Moderately protected
Central Sandy Bushveld	98.9713	SVcb 12	Vulnerable	Savanna Biome	Central Bushveld Bioregion	Poorly protected
Waterberg-Magaliesberg Summit Sourveld	108.133	Gm 29	Least threatened	Grassland Biome	Mesic Highveld Grassland Bioregion	Well protected
Northern Afrotemperate Forest	0.928	FOz 2	Least threatened	Forests	Zonal & Intrazonal Forests	Well protected
Northern Afrotemperate Forest	0.292	FOz 2	Least threatened	Forests	Zonal & Intrazonal Forests	Well protected
Waterberg Mountain Bushveld	832.02	SVcb 17	Least threatened	Savanna Biome	Central Bushveld Bioregion	Poorly protected
Waterberg-Magaliesberg Summit Sourveld	13.3674	Gm 29	Least threatened	Grassland Biome	Mesic Highveld Grassland Bioregion	Well protected
Waterberg-Magaliesberg Summit Sourveld	1.3223	Gm 29	Least threatened	Grassland Biome	Mesic Highveld Grassland Bioregion	Well protected
Waterberg-Magaliesberg Summit Sourveld	1.7467	Gm 29	Least threatened	Grassland Biome	Mesic Highveld Grassland Bioregion	Well protected
Waterberg-Magaliesberg Summit Sourveld	4.9263	Gm 29	Least threatened	Grassland Biome	Mesic Highveld Grassland Bioregion	Well protected
Waterberg-Magaliesberg Summit Sourveld	0.9858	Gm 29	Least threatened	Grassland Biome	Mesic Highveld Grassland Bioregion	Well protected
Waterberg-Magaliesberg Summit Sourveld	59.2642	Gm 29	Least threatened	Grassland Biome	Mesic Highveld Grassland Bioregion	Well protected
Waterberg-Magaliesberg Summit Sourveld	1.2895	Gm 29	Least threatened	Grassland Biome	Mesic Highveld Grassland Bioregion	Well protected
Waterberg-Magaliesberg Summit Sourveld	0.4079	Gm 29	Least threatened	Grassland Biome	Mesic Highveld Grassland Bioregion	Well protected
Waterberg-Magaliesberg Summit Sourveld	1.9995	Gm 29	Least threatened	Grassland Biome	Mesic Highveld Grassland Bioregion	Well protected
Waterberg-Magaliesberg Summit Sourveld	18.5973	Gm 29	Least threatened	Grassland Biome	Mesic Highveld Grassland Bioregion	Well protected
Waterberg-Magaliesberg Summit Sourveld	66.2804	Gm 29	Least threatened	Grassland Biome	Mesic Highveld Grassland Bioregion	Well protected
Waterberg-Magaliesberg Summit Sourveld	0.7323	Gm 29	Least threatened	Grassland Biome	Mesic Highveld Grassland Bioregion	Well protected
Waterberg-Magaliesberg Summit Sourveld	0.5242	Gm 29	Least threatened	Grassland Biome	Mesic Highveld Grassland Bioregion	Well protected
Waterberg-Magaliesberg Summit Sourveld	48.0382	Gm 29	Least threatened	Grassland Biome	Mesic Highveld Grassland Bioregion	Well protected
Waterberg-Magaliesberg Summit Sourveld	10.7495	Gm 29	Least threatened	Grassland Biome	Mesic Highveld Grassland Bioregion	Well protected
Waterberg-Magaliesberg Summit Sourveld	1.409	Gm 29	Least threatened	Grassland Biome	Mesic Highveld Grassland Bioregion	Well protected
Waterberg-Magaliesberg Summit Sourveld	3.2739	Gm 29	Least threatened	Grassland Biome	Mesic Highveld Grassland Bioregion	Well protected
Waterberg-Magaliesberg Summit Sourveld	0.5275	Gm 29	Least threatened	Grassland Biome	Mesic Highveld Grassland Bioregion	Well protected
Waterberg-Magaliesberg Summit Sourveld	0.7075	Gm 29	Least threatened	Grassland Biome	Mesic Highveld Grassland Bioregion	Well protected
Waterberg-Magaliesberg Summit Sourveld	11.7146	Gm 29	Least threatened	Grassland Biome	Mesic Highveld Grassland Bioregion	Well protected
Waterberg-Magaliesberg Summit Sourveld	1.452	Gm 29	Least threatened	Grassland Biome	Mesic Highveld Grassland Bioregion	Well protected
Waterberg-Magaliesberg Summit Sourveld	0.8045	Gm 29	Least threatened	Grassland Biome	Mesic Highveld Grassland Bioregion	Well protected
Waterberg-Magaliesberg Summit Sourveld	0.3981	Gm 29	Least threatened	Grassland Biome	Mesic Highveld Grassland Bioregion	Well protected
Waterberg Mountain Bushveld	828.687	SVcb 17	Least threatened	Savanna Biome	Central Bushveld Bioregion	Poorly protected
Waterberg-Magaliesberg Summit Sourveld	0.858	Gm 29	Least threatened	Grassland Biome	Mesic Highveld Grassland Bioregion	Well protected
Waterberg-Magaliesberg Summit Sourveld	1.2672	Gm 29	Least threatened	Grassland Biome	Mesic Highveld Grassland Bioregion	Well protected
Waterberg-Magaliesberg Summit Sourveld	0.8075	Gm 29	Least threatened	Grassland Biome	Mesic Highveld Grassland Bioregion	Well protected
Waterberg-Magaliesberg Summit Sourveld	0.5118	Gm 29	Least threatened	Grassland Biome	Mesic Highveld Grassland Bioregion	Well protected
Waterberg-Magaliesberg Summit Sourveld	2.8165	Gm 29	Least threatened	Grassland Biome	Mesic Highveld Grassland Bioregion	Well protected
Zeerust Thornveld	4128.19	SVcb 3	Least threatened	Savanna Biome	Central Bushveld Bioregion	Poorly protected
Gold Reef Mountain Bushveld	657.042	SVcb 9	Least threatened	Savanna Biome	Central Bushveld Bioregion	Moderately protected
Marikana Thornveld	2528.7	SVcb 6	Endangered	Savanna Biome	Central Bushveld Bioregion	Hardly protected
Moot Plains Bushveld	380.228	SVcb 8	Vulnerable	Savanna Biome	Central Bushveld Bioregion	Poorly protected
Moot Plains Bushveld	1270.79	SVcb 8	Vulnerable	Savanna Biome	Central Bushveld Bioregion	Poorly protected
Northern Afrotemperate Forest	0.0766	FOz 2	Least threatened	Forests	Zonal & Intrazonal Forests	Well protected
Northern Afrotemperate Forest	0.0529	FOz 2	Least threatened	Forests	Zonal & Intrazonal Forests	Well protected
Norite Koppies Bushveld	1.1519	SVcb 7	See text	Savanna Biome	Central Bushveld Bioregion	Not protected
Northern Afrotemperate Forest	0.0725	FOz 2	Least threatened	Forests	Zonal & Intrazonal Forests	Well protected
Northern Afrotemperate Forest	0.2865	FOz 2	Least threatened	Forests	Zonal & Intrazonal Forests	Well protected
Northern Afrotemperate Forest	0.3795	FOz 2	Least threatened	Forests	Zonal & Intrazonal Forests	Well protected
Northern Afrotemperate Forest	0.951	FOz 2	Least threatened	Forests	Zonal & Intrazonal Forests	Well protected
Northern Afrotemperate Forest	0.4386	FOz 2	Least threatened	Forests	Zonal & Intrazonal Forests	Well protected
Waterberg-Magaliesberg Summit Sourveld	4.3951	Gm 29	Least threatened	Grassland Biome	Mesic Highveld Grassland Bioregion	Well protected
Northern Afrotemperate Forest	0.4273	FOz 2	Least threatened	Forests	Zonal & Intrazonal Forests	Well protected
Northern Afrotemperate Forest	2.2419	FOz 2	Least threatened	Forests	Zonal & Intrazonal Forests	Well protected
Gold Reef Mountain Bushveld	0.4236	SVcb 9	Least threatened	Savanna Biome	Central Bushveld Bioregion	Moderately protected
Waterberg-Magaliesberg Summit Sourveld	20.1501	Gm 29	Least threatened	Grassland Biome	Mesic Highveld Grassland Bioregion	Well protected
Waterberg-Magaliesberg Summit Sourveld	0.3557	Gm 29	Least threatened	Grassland Biome	Mesic Highveld Grassland Bioregion	Well protected
Northern Afrotemperate Forest	0.4016	FOz 2	Least threatened	Forests	Zonal & Intrazonal Forests	Well protected
Northern Afrotemperate Forest	0.443	FOz 2	Least threatened	Forests	Zonal & Intrazonal Forests	Well protected
Northern Afrotemperate Forest	0.1857	FOz 2	Least threatened	Forests	Zonal & Intrazonal Forests	Well protected

## Sheet: CGM
Vegetation type	Polygon square kilometres (POLYSQKM)	Book code	Conservation status	Biome	Bioregion	Protection status
Kathu Bushveld	5715.47	SVk 12	Least threatened	Savanna Biome	Eastern Kalahari Bushveld Bioregion	Not protected
Kuruman Thornveld	5719.87	SVk 9	Least threatened	Savanna Biome	Eastern Kalahari Bushveld Bioregion	Not protected
Gordonia Plains Shrubland	6953.79	SVk 16	Least threatened	Savanna Biome	Eastern Kalahari Bushveld Bioregion	Moderately protected
Kuruman Vaalbosveld	3932.38	SVk 8	Least threatened	Savanna Biome	Eastern Kalahari Bushveld Bioregion	Not protected
Olifantshoek Plains Thornveld	7742.67	SVk 13	Least threatened	Savanna Biome	Eastern Kalahari Bushveld Bioregion	Hardly protected
Kuruman Mountain Bushveld	1237.13	SVk 10	Least threatened	Savanna Biome	Eastern Kalahari Bushveld Bioregion	Not protected
Koranna-Langeberg Mountain Bushveld	368.886	SVk 15	Least threatened	Savanna Biome	Eastern Kalahari Bushveld Bioregion	Not protected
Koranna-Langeberg Mountain Bushveld	0.8828	SVk 15	Least threatened	Savanna Biome	Eastern Kalahari Bushveld Bioregion	Not protected
Koranna-Langeberg Mountain Bushveld	2.2718	SVk 15	Least threatened	Savanna Biome	Eastern Kalahari Bushveld Bioregion	Not protected
Koranna-Langeberg Mountain Bushveld	2.4046	SVk 15	Least threatened	Savanna Biome	Eastern Kalahari Bushveld Bioregion	Not protected
Koranna-Langeberg Mountain Bushveld	21.5772	SVk 15	Least threatened	Savanna Biome	Eastern Kalahari Bushveld Bioregion	Not protected
Koranna-Langeberg Mountain Bushveld	328.43	SVk 15	Least threatened	Savanna Biome	Eastern Kalahari Bushveld Bioregion	Not protected
Koranna-Langeberg Mountain Bushveld	2.166	SVk 15	Least threatened	Savanna Biome	Eastern Kalahari Bushveld Bioregion	Not protected
Koranna-Langeberg Mountain Bushveld	1.6928	SVk 15	Least threatened	Savanna Biome	Eastern Kalahari Bushveld Bioregion	Not protected
Koranna-Langeberg Mountain Bushveld	0.1482	SVk 15	Least threatened	Savanna Biome	Eastern Kalahari Bushveld Bioregion	Not protected

## Sheet: SGE
NAME	Polygon square kilometres (POLYSQKM)	Book code	Conservation status	Biome	Bioregion	Protection status
Bushmanland Vloere	1803.49	AZi 5	Least threatened	Azonal Vegetation	Inland Saline Vegetation	Not protected
Eastern Upper Karoo	46216.4	NKu 4	Least threatened	Nama-Karoo Biome	Upper Karoo Bioregion	Hardly protected
Hantam Karoo	7095.62	SKt 2	Least threatened	Succulent Karoo Biome	Trans-Escarpment Succulent Karoo Bioregion	Hardly protected
Western Upper Karoo	15183.1	NKu 1	Least threatened	Nama-Karoo Biome	Upper Karoo Bioregion	Hardly protected
Hantam Plateau Dolerite Renosterveld	4.7486	FRd 2	Least threatened	Fynbos Biome	Karoo Renosterveld Bioregion	Hardly protected
Hantam Plateau Dolerite Renosterveld	179.423	FRd 2	Least threatened	Fynbos Biome	Karoo Renosterveld Bioregion	Hardly protected
Hantam Plateau Dolerite Renosterveld	380.583	FRd 2	Least threatened	Fynbos Biome	Karoo Renosterveld Bioregion	Hardly protected
Hantam Plateau Dolerite Renosterveld	0.4336	FRd 2	Least threatened	Fynbos Biome	Karoo Renosterveld Bioregion	Hardly protected
Hantam Karoo	1.5717	SKt 2	Least threatened	Succulent Karoo Biome	Trans-Escarpment Succulent Karoo Bioregion	Hardly protected
Hantam Plateau Dolerite Renosterveld	1.9202	FRd 2	Least threatened	Fynbos Biome	Karoo Renosterveld Bioregion	Hardly protected
Hantam Plateau Dolerite Renosterveld	15.3571	FRd 2	Least threatened	Fynbos Biome	Karoo Renosterveld Bioregion	Hardly protected
Upper Karoo Hardeveld	48.772	NKu 2	Least threatened	Nama-Karoo Biome	Upper Karoo Bioregion	Poorly protected
Roggeveld Karoo	5399.25	SKt 3	Least threatened	Succulent Karoo Biome	Trans-Escarpment Succulent Karoo Bioregion	Not protected
Hantam Plateau Dolerite Renosterveld	16.6387	FRd 2	Least threatened	Fynbos Biome	Karoo Renosterveld Bioregion	Hardly protected
Tanqua Escarpment Shrubland	1321.33	SKv 4	Least threatened	Succulent Karoo Biome	Rainshadow Valley Karoo Bioregion	Hardly protected
Roggeveld Shale Renosterveld	0.5771	FRs 3	Least threatened	Fynbos Biome	Karoo Renosterveld Bioregion	Not protected
Roggeveld Shale Renosterveld	2.5901	FRs 3	Least threatened	Fynbos Biome	Karoo Renosterveld Bioregion	Not protected
Tanqua Karoo	3112.78	SKv 5	Least threatened	Succulent Karoo Biome	Rainshadow Valley Karoo Bioregion	Poorly protected
Southern Karoo Riviere	2369.36	AZi 6	Least threatened	Azonal Vegetation	Inland Saline Vegetation	Hardly protected
Roggeveld Shale Renosterveld	6.0658	FRs 3	Least threatened	Fynbos Biome	Karoo Renosterveld Bioregion	Not protected
Roggeveld Shale Renosterveld	0.5661	FRs 3	Least threatened	Fynbos Biome	Karoo Renosterveld Bioregion	Not protected
Roggeveld Shale Renosterveld	6.5422	FRs 3	Least threatened	Fynbos Biome	Karoo Renosterveld Bioregion	Not protected
Upper Karoo Hardeveld	34.354	NKu 2	Least threatened	Nama-Karoo Biome	Upper Karoo Bioregion	Poorly protected
Eastern Upper Karoo	3.0935	NKu 4	Least threatened	Nama-Karoo Biome	Upper Karoo Bioregion	Hardly protected
Eastern Upper Karoo	7.3498	NKu 4	Least threatened	Nama-Karoo Biome	Upper Karoo Bioregion	Hardly protected
Upper Karoo Hardeveld	55.2687	NKu 2	Least threatened	Nama-Karoo Biome	Upper Karoo Bioregion	Poorly protected
Eastern Upper Karoo	28.6221	NKu 4	Least threatened	Nama-Karoo Biome	Upper Karoo Bioregion	Hardly protected
Roggeveld Shale Renosterveld	0.6571	FRs 3	Least threatened	Fynbos Biome	Karoo Renosterveld Bioregion	Not protected
Roggeveld Shale Renosterveld	71.5943	FRs 3	Least threatened	Fynbos Biome	Karoo Renosterveld Bioregion	Not protected
Eastern Upper Karoo	0.5336	NKu 4	Least threatened	Nama-Karoo Biome	Upper Karoo Bioregion	Hardly protected
Roggeveld Shale Renosterveld	1.7	FRs 3	Least threatened	Fynbos Biome	Karoo Renosterveld Bioregion	Not protected
Eastern Upper Karoo	4.3815	NKu 4	Least threatened	Nama-Karoo Biome	Upper Karoo Bioregion	Hardly protected
Tanqua Wash Riviere	1993.63	AZi 7	Least threatened	Azonal Vegetation	Inland Saline Vegetation	Moderately protected
Eastern Upper Karoo	1.2149	NKu 4	Least threatened	Nama-Karoo Biome	Upper Karoo Bioregion	Hardly protected
Roggeveld Shale Renosterveld	0.4421	FRs 3	Least threatened	Fynbos Biome	Karoo Renosterveld Bioregion	Not protected
Upper Karoo Hardeveld	1800.06	NKu 2	Least threatened	Nama-Karoo Biome	Upper Karoo Bioregion	Poorly protected
Upper Karoo Hardeveld	3.0893	NKu 2	Least threatened	Nama-Karoo Biome	Upper Karoo Bioregion	Poorly protected
Nieuwoudtville-Roggeveld Dolerite Renosterveld	17.8119	FRd 1	Least threatened	Fynbos Biome	Karoo Renosterveld Bioregion	Not protected
Eastern Upper Karoo	0.8987	NKu 4	Least threatened	Nama-Karoo Biome	Upper Karoo Bioregion	Hardly protected
Roggeveld Shale Renosterveld	0.4448	FRs 3	Least threatened	Fynbos Biome	Karoo Renosterveld Bioregion	Not protected
Upper Karoo Hardeveld	114.945	NKu 2	Least threatened	Nama-Karoo Biome	Upper Karoo Bioregion	Poorly protected
Upper Karoo Hardeveld	1.6375	NKu 2	Least threatened	Nama-Karoo Biome	Upper Karoo Bioregion	Poorly protected
Western Upper Karoo	408.556	NKu 1	Least threatened	Nama-Karoo Biome	Upper Karoo Bioregion	Hardly protected
Roggeveld Shale Renosterveld	1.2497	FRs 3	Least threatened	Fynbos Biome	Karoo Renosterveld Bioregion	Not protected
Roggeveld Shale Renosterveld	0.719	FRs 3	Least threatened	Fynbos Biome	Karoo Renosterveld Bioregion	Not protected
Roggeveld Shale Renosterveld	2.2725	FRs 3	Least threatened	Fynbos Biome	Karoo Renosterveld Bioregion	Not protected
Nieuwoudtville-Roggeveld Dolerite Renosterveld	0.5021	FRd 1	Least threatened	Fynbos Biome	Karoo Renosterveld Bioregion	Not protected
Upper Karoo Hardeveld	3.4644	NKu 2	Least threatened	Nama-Karoo Biome	Upper Karoo Bioregion	Poorly protected
Nieuwoudtville-Roggeveld Dolerite Renosterveld	5.5336	FRd 1	Least threatened	Fynbos Biome	Karoo Renosterveld Bioregion	Not protected
Upper Karoo Hardeveld	177.691	NKu 2	Least threatened	Nama-Karoo Biome	Upper Karoo Bioregion	Poorly protected
Eastern Upper Karoo	36.3537	NKu 4	Least threatened	Nama-Karoo Biome	Upper Karoo Bioregion	Hardly protected
Southern Karoo Riviere	1.801	AZi 6	Least threatened	Azonal Vegetation	Inland Saline Vegetation	Hardly protected
Roggeveld Shale Renosterveld	1.975	FRs 3	Least threatened	Fynbos Biome	Karoo Renosterveld Bioregion	Not protected
Eastern Upper Karoo	159.787	NKu 4	Least threatened	Nama-Karoo Biome	Upper Karoo Bioregion	Hardly protected
Eastern Upper Karoo	47.8983	NKu 4	Least threatened	Nama-Karoo Biome	Upper Karoo Bioregion	Hardly protected
Eastern Upper Karoo	126.571	NKu 4	Least threatened	Nama-Karoo Biome	Upper Karoo Bioregion	Hardly protected
Upper Karoo Hardeveld	63.2405	NKu 2	Least threatened	Nama-Karoo Biome	Upper Karoo Bioregion	Poorly protected
Roggeveld Shale Renosterveld	4.6821	FRs 3	Least threatened	Fynbos Biome	Karoo Renosterveld Bioregion	Not protected
Upper Karoo Hardeveld	8.4751	NKu 2	Least threatened	Nama-Karoo Biome	Upper Karoo Bioregion	Poorly protected
Eastern Upper Karoo	25.8235	NKu 4	Least threatened	Nama-Karoo Biome	Upper Karoo Bioregion	Hardly protected
Roggeveld Karoo	164.176	SKt 3	Least threatened	Succulent Karoo Biome	Trans-Escarpment Succulent Karoo Bioregion	Not protected
Eastern Upper Karoo	1.069	NKu 4	Least threatened	Nama-Karoo Biome	Upper Karoo Bioregion	Hardly protected
Tanqua Karoo	21.0016	SKv 5	Least threatened	Succulent Karoo Biome	Rainshadow Valley Karoo Bioregion	Poorly protected
Upper Karoo Hardeveld	62.4253	NKu 2	Least threatened	Nama-Karoo Biome	Upper Karoo Bioregion	Poorly protected
Karoo Escarpment Grassland	50.4785	Gh 1	Least threatened	Grassland Biome	Dry Highveld Grassland Bioregion	Poorly protected
Nieuwoudtville-Roggeveld Dolerite Renosterveld	7.5093	FRd 1	Least threatened	Fynbos Biome	Karoo Renosterveld Bioregion	Not protected
Roggeveld Shale Renosterveld	215.588	FRs 3	Least threatened	Fynbos Biome	Karoo Renosterveld Bioregion	Not protected
Eastern Upper Karoo	0.2854	NKu 4	Least threatened	Nama-Karoo Biome	Upper Karoo Bioregion	Hardly protected
Roggeveld Shale Renosterveld	0.6938	FRs 3	Least threatened	Fynbos Biome	Karoo Renosterveld Bioregion	Not protected
Eastern Upper Karoo	26.588	NKu 4	Least threatened	Nama-Karoo Biome	Upper Karoo Bioregion	Hardly protected
Bushmanland Vloere	2.7754	AZi 5	Least threatened	Azonal Vegetation	Inland Saline Vegetation	Not protected
Gamka Karoo	16993	NKl 1	Least threatened	Nama-Karoo Biome	Lower Karoo Bioregion	Poorly protected
Roggeveld Shale Renosterveld	178.035	FRs 3	Least threatened	Fynbos Biome	Karoo Renosterveld Bioregion	Not protected
Upper Karoo Hardeveld	1.6172	NKu 2	Least threatened	Nama-Karoo Biome	Upper Karoo Bioregion	Poorly protected
Eastern Upper Karoo	9.9458	NKu 4	Least threatened	Nama-Karoo Biome	Upper Karoo Bioregion	Hardly protected
Bushmanland Vloere	0.3179	AZi 5	Least threatened	Azonal Vegetation	Inland Saline Vegetation	Not protected
Bushmanland Vloere	2.6255	AZi 5	Least threatened	Azonal Vegetation	Inland Saline Vegetation	Not protected
Bushmanland Vloere	0.3776	AZi 5	Least threatened	Azonal Vegetation	Inland Saline Vegetation	Not protected
Nieuwoudtville-Roggeveld Dolerite Renosterveld	0.5512	FRd 1	Least threatened	Fynbos Biome	Karoo Renosterveld Bioregion	Not protected
Roggeveld Shale Renosterveld	708.783	FRs 3	Least threatened	Fynbos Biome	Karoo Renosterveld Bioregion	Not protected
Bushmanland Vloere	52.1269	AZi 5	Least threatened	Azonal Vegetation	Inland Saline Vegetation	Not protected
Nieuwoudtville-Roggeveld Dolerite Renosterveld	22.1022	FRd 1	Least threatened	Fynbos Biome	Karoo Renosterveld Bioregion	Not protected
Bushmanland Vloere	1.1627	AZi 5	Least threatened	Azonal Vegetation	Inland Saline Vegetation	Not protected
Upper Karoo Hardeveld	0.2367	NKu 2	Least threatened	Nama-Karoo Biome	Upper Karoo Bioregion	Poorly protected
Upper Karoo Hardeveld	10.3262	NKu 2	Least threatened	Nama-Karoo Biome	Upper Karoo Bioregion	Poorly protected
Bushmanland Vloere	0.1559	AZi 5	Least threatened	Azonal Vegetation	Inland Saline Vegetation	Not protected
Upper Karoo Hardeveld	36.9721	NKu 2	Least threatened	Nama-Karoo Biome	Upper Karoo Bioregion	Poorly protected
Nieuwoudtville-Roggeveld Dolerite Renosterveld	6.3052	FRd 1	Least threatened	Fynbos Biome	Karoo Renosterveld Bioregion	Not protected
Roggeveld Karoo	0.7542	SKt 3	Least threatened	Succulent Karoo Biome	Trans-Escarpment Succulent Karoo Bioregion	Not protected
Upper Karoo Hardeveld	0.088	NKu 2	Least threatened	Nama-Karoo Biome	Upper Karoo Bioregion	Poorly protected
Eastern Upper Karoo	42.006	NKu 4	Least threatened	Nama-Karoo Biome	Upper Karoo Bioregion	Hardly protected
Roggeveld Karoo	2.9945	SKt 3	Least threatened	Succulent Karoo Biome	Trans-Escarpment Succulent Karoo Bioregion	Not protected
Nieuwoudtville-Roggeveld Dolerite Renosterveld	101.778	FRd 1	Least threatened	Fynbos Biome	Karoo Renosterveld Bioregion	Not protected
Upper Karoo Hardeveld	3.4416	NKu 2	Least threatened	Nama-Karoo Biome	Upper Karoo Bioregion	Poorly protected
Karoo Escarpment Grassland	16.7117	Gh 1	Least threatened	Grassland Biome	Dry Highveld Grassland Bioregion	Poorly protected
Roggeveld Karoo	10.602	SKt 3	Least threatened	Succulent Karoo Biome	Trans-Escarpment Succulent Karoo Bioregion	Not protected
Karoo Escarpment Grassland	30.2636	Gh 1	Least threatened	Grassland Biome	Dry Highveld Grassland Bioregion	Poorly protected
Roggeveld Shale Renosterveld	0.4364	FRs 3	Least threatened	Fynbos Biome	Karoo Renosterveld Bioregion	Not protected
Southern Karoo Riviere	328.77	AZi 6	Least threatened	Azonal Vegetation	Inland Saline Vegetation	Hardly protected
Roggeveld Karoo	77.5342	SKt 3	Least threatened	Succulent Karoo Biome	Trans-Escarpment Succulent Karoo Bioregion	Not protected
Roggeveld Shale Renosterveld	1671.21	FRs 3	Least threatened	Fynbos Biome	Karoo Renosterveld Bioregion	Not protected
Roggeveld Shale Renosterveld	10.6093	FRs 3	Least threatened	Fynbos Biome	Karoo Renosterveld Bioregion	Not protected
Roggeveld Karoo	0.23	SKt 3	Least threatened	Succulent Karoo Biome	Trans-Escarpment Succulent Karoo Bioregion	Not protected
Roggeveld Shale Renosterveld	20.4822	FRs 3	Least threatened	Fynbos Biome	Karoo Renosterveld Bioregion	Not protected
Roggeveld Shale Renosterveld	0.6931	FRs 3	Least threatened	Fynbos Biome	Karoo Renosterveld Bioregion	Not protected
Roggeveld Shale Renosterveld	1.0236	FRs 3	Least threatened	Fynbos Biome	Karoo Renosterveld Bioregion	Not protected
Roggeveld Shale Renosterveld	0.4343	FRs 3	Least threatened	Fynbos Biome	Karoo Renosterveld Bioregion	Not protected
Roggeveld Shale Renosterveld	1.8313	FRs 3	Least threatened	Fynbos Biome	Karoo Renosterveld Bioregion	Not protected
Tanqua Karoo	46.2638	SKv 5	Least threatened	Succulent Karoo Biome	Rainshadow Valley Karoo Bioregion	Poorly protected
Tanqua Karoo	1323.4	SKv 5	Least threatened	Succulent Karoo Biome	Rainshadow Valley Karoo Bioregion	Poorly protected
Koedoesberge-Moordenaars Karoo	4714.5	SKv 6	Least threatened	Succulent Karoo Biome	Rainshadow Valley Karoo Bioregion	Hardly protected
Roggeveld Shale Renosterveld	5.0061	FRs 3	Least threatened	Fynbos Biome	Karoo Renosterveld Bioregion	Not protected
Bushmanland Vloere	0.118	AZi 5	Least threatened	Azonal Vegetation	Inland Saline Vegetation	Not protected
Bushmanland Vloere	0.1124	AZi 5	Least threatened	Azonal Vegetation	Inland Saline Vegetation	Not protected
Central Mountain Shale Renosterveld	1222.36	FRs 5	Least threatened	Fynbos Biome	Karoo Renosterveld Bioregion	Not protected
Tanqua Wash Riviere	135.909	AZi 7	Least threatened	Azonal Vegetation	Inland Saline Vegetation	Moderately protected
Central Mountain Shale Renosterveld	0.4163	FRs 5	Least threatened	Fynbos Biome	Karoo Renosterveld Bioregion	Not protected
Central Mountain Shale Renosterveld	2.3442	FRs 5	Least threatened	Fynbos Biome	Karoo Renosterveld Bioregion	Not protected
Central Mountain Shale Renosterveld	0.3795	FRs 5	Least threatened	Fynbos Biome	Karoo Renosterveld Bioregion	Not protected
Central Mountain Shale Renosterveld	0.5118	FRs 5	Least threatened	Fynbos Biome	Karoo Renosterveld Bioregion	Not protected
Central Mountain Shale Renosterveld	1.048	FRs 5	Least threatened	Fynbos Biome	Karoo Renosterveld Bioregion	Not protected
Central Mountain Shale Renosterveld	2.7181	FRs 5	Least threatened	Fynbos Biome	Karoo Renosterveld Bioregion	Not protected
Central Mountain Shale Renosterveld	1.1375	FRs 5	Least threatened	Fynbos Biome	Karoo Renosterveld Bioregion	Not protected
Central Mountain Shale Renosterveld	3.1383	FRs 5	Least threatened	Fynbos Biome	Karoo Renosterveld Bioregion	Not protected
Central Mountain Shale Renosterveld	2.4569	FRs 5	Least threatened	Fynbos Biome	Karoo Renosterveld Bioregion	Not protected
Tanqua Karoo	22.0732	SKv 5	Least threatened	Succulent Karoo Biome	Rainshadow Valley Karoo Bioregion	Poorly protected

## Sheet: WGE
Vegetation type	Polygon square kilometres (POLYSQKM)	Book code	Conservation status	Biome	Bioregion	Protection status
Lower Gariep Alluvial Vegetation	22.6624	AZa 3	Endangered	Azonal Vegetation	Alluvial Vegetation	Poorly protected
Noms Mountain Desert	335.739	Dg 1	Least threatened	Desert Biome	Gariep Desert Bioregion	Well protected
Richtersveld Sheet Wash Desert	7.452	Dg 3	Least threatened	Desert Biome	Gariep Desert Bioregion	Well protected
Western Gariep Hills Desert	413.61	Dn 5	Least threatened	Desert Biome	Southern Namib Desert Bioregion	Poorly protected
Northern Richtersveld Scorpionstailveld	40.232	SKr 7	Least threatened	Succulent Karoo Biome	Richtersveld Bioregion	Moderately protected
Richtersberg Mountain Desert	352.008	Dg 2	Least threatened	Desert Biome	Gariep Desert Bioregion	Well protected
Richtersveld Sheet Wash Desert	9.2047	Dg 3	Least threatened	Desert Biome	Gariep Desert Bioregion	Well protected
Richtersveld Sheet Wash Desert	2.9787	Dg 3	Least threatened	Desert Biome	Gariep Desert Bioregion	Well protected
Richtersveld Sheet Wash Desert	1.4129	Dg 3	Least threatened	Desert Biome	Gariep Desert Bioregion	Well protected
Northern Richtersveld Scorpionstailveld	3.1037	SKr 7	Least threatened	Succulent Karoo Biome	Richtersveld Bioregion	Moderately protected
Richtersveld Sheet Wash Desert	1.1442	Dg 3	Least threatened	Desert Biome	Gariep Desert Bioregion	Well protected
Northern Richtersveld Scorpionstailveld	7.089	SKr 7	Least threatened	Succulent Karoo Biome	Richtersveld Bioregion	Moderately protected
Richtersveld Sheet Wash Desert	1.3941	Dg 3	Least threatened	Desert Biome	Gariep Desert Bioregion	Well protected
Tatasberg Mountain Succulent Shrubland	3.2657	SKr 9	Least threatened	Succulent Karoo Biome	Richtersveld Bioregion	Well protected
Richtersveld Sheet Wash Desert	95.6268	Dg 3	Least threatened	Desert Biome	Gariep Desert Bioregion	Well protected
Richtersberg Mountain Desert	8.8313	Dg 2	Least threatened	Desert Biome	Gariep Desert Bioregion	Well protected
Richtersveld Sheet Wash Desert	13.9674	Dg 3	Least threatened	Desert Biome	Gariep Desert Bioregion	Well protected
Kwaggarug Mountain Desert	108.314	Dg 4	Least threatened	Desert Biome	Gariep Desert Bioregion	Well protected
Northern Richtersveld Scorpionstailveld	14.856	SKr 7	Least threatened	Succulent Karoo Biome	Richtersveld Bioregion	Moderately protected
Stinkfonteinberge Quartzite Fynbos	14.7108	FFq 1	Least threatened	Fynbos Biome	Namaqualand Cape Shrublands Bioregion	Well protected
Northern Richtersveld Scorpionstailveld	3.2047	SKr 7	Least threatened	Succulent Karoo Biome	Richtersveld Bioregion	Moderately protected
Northern Richtersveld Scorpionstailveld	5.7538	SKr 7	Least threatened	Succulent Karoo Biome	Richtersveld Bioregion	Moderately protected
Western Gariep Lowland Desert	239.466	Dn 4	Least threatened	Desert Biome	Southern Namib Desert Bioregion	Not protected
Upper Annisvlakte Succulent Shrubland	191.807	SKr 2	Least threatened	Succulent Karoo Biome	Richtersveld Bioregion	Not protected
Rosyntjieberg Succulent Shrubland	50.5517	SKr 8	Least threatened	Succulent Karoo Biome	Richtersveld Bioregion	Well protected
Bushmanland Arid Grassland	41085.1	NKb 3	Least threatened	Nama-Karoo Biome	Bushmanland Bioregion	Hardly protected
Lower Gariep Alluvial Vegetation	32.82	AZa 3	Endangered	Azonal Vegetation	Alluvial Vegetation	Poorly protected
Kahams Mountain Desert	594.48	Dg 5	Least threatened	Desert Biome	Gariep Desert Bioregion	Poorly protected
Goariep Mountain Succulent Shrubland	170.777	SKr 3	Least threatened	Succulent Karoo Biome	Richtersveld Bioregion	Not protected
Stinkfonteinberge Eastern Apron Shrubland	65.8693	SKr 6	Least threatened	Succulent Karoo Biome	Richtersveld Bioregion	Poorly protected
Stinkfonteinberge Quartzite Fynbos	34.317	FFq 1	Least threatened	Fynbos Biome	Namaqualand Cape Shrublands Bioregion	Well protected
Lekkersing Succulent Shrubland	22.6758	SKr 4	Least threatened	Succulent Karoo Biome	Richtersveld Bioregion	Not protected
Northern Richtersveld Scorpionstailveld	290.18	SKr 7	Least threatened	Succulent Karoo Biome	Richtersveld Bioregion	Moderately protected
Lekkersing Succulent Shrubland	80.6281	SKr 4	Least threatened	Succulent Karoo Biome	Richtersveld Bioregion	Not protected
Lekkersing Succulent Shrubland	632.929	SKr 4	Least threatened	Succulent Karoo Biome	Richtersveld Bioregion	Not protected
Rooiberg Quartz Vygieveld	129.275	SKr 11	Least threatened	Succulent Karoo Biome	Richtersveld Bioregion	Not protected
Southern Nababiepsberge Mountain Desert	343.199	Dg 8	Least threatened	Desert Biome	Gariep Desert Bioregion	Not protected
Kosiesberg Succulent Shrubland	612.147	SKr 12	Least threatened	Succulent Karoo Biome	Richtersveld Bioregion	Not protected
Die Plate Succulent Shrubland	127.563	SKr 10	Least threatened	Succulent Karoo Biome	Richtersveld Bioregion	Not protected
Southern Richtersveld Scorpionstailveld	721.39	SKr 13	See text	Succulent Karoo Biome	Richtersveld Bioregion	Not protected
Umdaus Mountains Succulent Shrubland	429.868	SKr 16	Least threatened	Succulent Karoo Biome	Richtersveld Bioregion	Not protected
Eenriet Plains Succulent Shrubland	161.765	SKr 17	Least threatened	Succulent Karoo Biome	Richtersveld Bioregion	Not protected
Anenous Plateau Shrubland	234.281	SKr 15	Least threatened	Succulent Karoo Biome	Richtersveld Bioregion	Not protected
Namaqualand Shale Shrubland	668.276	SKn 2	Least threatened	Succulent Karoo Biome	Namaqualand Hardeveld Bioregion	Not protected
Namaqualand Klipkoppe Shrubland	30.9676	SKn 1	Least threatened	Succulent Karoo Biome	Namaqualand Hardeveld Bioregion	Poorly protected
Namaqualand Blomveld	725.942	SKn 3	Least threatened	Succulent Karoo Biome	Namaqualand Hardeveld Bioregion	Hardly protected
Namaqualand Heuweltjieveld	458.683	SKn 4	Least threatened	Succulent Karoo Biome	Namaqualand Hardeveld Bioregion	Poorly protected
Namaqualand Klipkoppe Shrubland	478.353	SKn 1	Least threatened	Succulent Karoo Biome	Namaqualand Hardeveld Bioregion	Poorly protected
Namaqualand Klipkoppe Shrubland	13.1494	SKn 1	Least threatened	Succulent Karoo Biome	Namaqualand Hardeveld Bioregion	Poorly protected
Namaqualand Klipkoppe Shrubland	9660.43	SKn 1	Least threatened	Succulent Karoo Biome	Namaqualand Hardeveld Bioregion	Poorly protected
Bushmanland Inselberg Shrubland	21.2533	SKr 18	Least threatened	Succulent Karoo Biome	Richtersveld Bioregion	Not protected
Namaqualand Blomveld	113.153	SKn 3	Least threatened	Succulent Karoo Biome	Namaqualand Hardeveld Bioregion	Hardly protected
Namaqualand Blomveld	23.4961	SKn 3	Least threatened	Succulent Karoo Biome	Namaqualand Hardeveld Bioregion	Hardly protected
Namaqualand Blomveld	22.4607	SKn 3	Least threatened	Succulent Karoo Biome	Namaqualand Hardeveld Bioregion	Hardly protected
Namaqualand Klipkoppe Shrubland	14.5018	SKn 1	Least threatened	Succulent Karoo Biome	Namaqualand Hardeveld Bioregion	Poorly protected
Namaqualand Heuweltjieveld	371.276	SKn 4	Least threatened	Succulent Karoo Biome	Namaqualand Hardeveld Bioregion	Poorly protected
Namaqualand Klipkoppe Shrubland	1.8217	SKn 1	Least threatened	Succulent Karoo Biome	Namaqualand Hardeveld Bioregion	Poorly protected
Namaqualand Blomveld	74.0352	SKn 3	Least threatened	Succulent Karoo Biome	Namaqualand Hardeveld Bioregion	Hardly protected
Namaqualand Klipkoppe Shrubland	51.6435	SKn 1	Least threatened	Succulent Karoo Biome	Namaqualand Hardeveld Bioregion	Poorly protected
Platbakkies Succulent Shrubland	532.398	SKn 5	Least threatened	Succulent Karoo Biome	Namaqualand Hardeveld Bioregion	Not protected
Namaqualand Blomveld	12.5344	SKn 3	Least threatened	Succulent Karoo Biome	Namaqualand Hardeveld Bioregion	Hardly protected
Namaqualand Blomveld	786.788	SKn 3	Least threatened	Succulent Karoo Biome	Namaqualand Hardeveld Bioregion	Hardly protected
Namaqualand Blomveld	74.7631	SKn 3	Least threatened	Succulent Karoo Biome	Namaqualand Hardeveld Bioregion	Hardly protected
Namaqualand Klipkoppe Shrubland	29.0103	SKn 1	Least threatened	Succulent Karoo Biome	Namaqualand Hardeveld Bioregion	Poorly protected
Namaqualand Klipkoppe Shrubland	21.104	SKn 1	Least threatened	Succulent Karoo Biome	Namaqualand Hardeveld Bioregion	Poorly protected
Namaqualand Klipkoppe Shrubland	6.2556	SKn 1	Least threatened	Succulent Karoo Biome	Namaqualand Hardeveld Bioregion	Poorly protected
Namaqualand Klipkoppe Shrubland	20.9632	SKn 1	Least threatened	Succulent Karoo Biome	Namaqualand Hardeveld Bioregion	Poorly protected
Namaqualand Klipkoppe Shrubland	31.7341	SKn 1	Least threatened	Succulent Karoo Biome	Namaqualand Hardeveld Bioregion	Poorly protected
Namaqualand Klipkoppe Shrubland	44.0217	SKn 1	Least threatened	Succulent Karoo Biome	Namaqualand Hardeveld Bioregion	Poorly protected
Namaqualand Blomveld	6.6543	SKn 3	Least threatened	Succulent Karoo Biome	Namaqualand Hardeveld Bioregion	Hardly protected
Namaqualand Arid Grassland	74.6598	SKs 11	Least threatened	Succulent Karoo Biome	Namaqualand Sandveld Bioregion	Moderately protected
Namaqualand Heuweltjieveld	579.054	SKn 4	Least threatened	Succulent Karoo Biome	Namaqualand Hardeveld Bioregion	Poorly protected
Kamiesberg Mountains Shrubland	4.6772	SKn 6	Least threatened	Succulent Karoo Biome	Namaqualand Hardeveld Bioregion	Poorly protected
Kamiesberg Mountains Shrubland	4.7855	SKn 6	Least threatened	Succulent Karoo Biome	Namaqualand Hardeveld Bioregion	Poorly protected
Platbakkies Succulent Shrubland	445.528	SKn 5	Least threatened	Succulent Karoo Biome	Namaqualand Hardeveld Bioregion	Not protected
Kamiesberg Mountains Shrubland	1.7583	SKn 6	Least threatened	Succulent Karoo Biome	Namaqualand Hardeveld Bioregion	Poorly protected
Kamiesberg Mountains Shrubland	2.2929	SKn 6	Least threatened	Succulent Karoo Biome	Namaqualand Hardeveld Bioregion	Poorly protected
Kamiesberg Mountains Shrubland	7.0193	SKn 6	Least threatened	Succulent Karoo Biome	Namaqualand Hardeveld Bioregion	Poorly protected
Kamiesberg Mountains Shrubland	1.1237	SKn 6	Least threatened	Succulent Karoo Biome	Namaqualand Hardeveld Bioregion	Poorly protected
Namaqualand Blomveld	59.503	SKn 3	Least threatened	Succulent Karoo Biome	Namaqualand Hardeveld Bioregion	Hardly protected
Kamiesberg Mountains Shrubland	9.6814	SKn 6	Least threatened	Succulent Karoo Biome	Namaqualand Hardeveld Bioregion	Poorly protected
Namaqualand Granite Renosterveld	2.8588	FRg 1	Least threatened	Fynbos Biome	Namaqualand Cape Shrublands Bioregion	Not protected
Kamiesberg Mountains Shrubland	9.1508	SKn 6	Least threatened	Succulent Karoo Biome	Namaqualand Hardeveld Bioregion	Poorly protected
Kamiesberg Mountains Shrubland	2.2769	SKn 6	Least threatened	Succulent Karoo Biome	Namaqualand Hardeveld Bioregion	Poorly protected
Namaqualand Granite Renosterveld	4.5714	FRg 1	Least threatened	Fynbos Biome	Namaqualand Cape Shrublands Bioregion	Not protected
Namaqualand Granite Renosterveld	24.0916	FRg 1	Least threatened	Fynbos Biome	Namaqualand Cape Shrublands Bioregion	Not protected
Kamiesberg Mountains Shrubland	0.775	SKn 6	Least threatened	Succulent Karoo Biome	Namaqualand Hardeveld Bioregion	Poorly protected
Kamiesberg Mountains Shrubland	1.4324	SKn 6	Least threatened	Succulent Karoo Biome	Namaqualand Hardeveld Bioregion	Poorly protected
Kamiesberg Mountains Shrubland	1.0971	SKn 6	Least threatened	Succulent Karoo Biome	Namaqualand Hardeveld Bioregion	Poorly protected
Namaqualand Granite Renosterveld	15.3608	FRg 1	Least threatened	Fynbos Biome	Namaqualand Cape Shrublands Bioregion	Not protected
Kamiesberg Granite Fynbos	1.3278	FFg 1	Least threatened	Fynbos Biome	Namaqualand Cape Shrublands Bioregion	Not protected
Kamiesberg Mountains Shrubland	3.4062	SKn 6	Least threatened	Succulent Karoo Biome	Namaqualand Hardeveld Bioregion	Poorly protected
Namaqualand Blomveld	5.0779	SKn 3	Least threatened	Succulent Karoo Biome	Namaqualand Hardeveld Bioregion	Hardly protected
Kamiesberg Mountains Shrubland	2.4391	SKn 6	Least threatened	Succulent Karoo Biome	Namaqualand Hardeveld Bioregion	Poorly protected
Kamiesberg Mountains Shrubland	2.5637	SKn 6	Least threatened	Succulent Karoo Biome	Namaqualand Hardeveld Bioregion	Poorly protected
Kamiesberg Mountains Shrubland	3.9897	SKn 6	Least threatened	Succulent Karoo Biome	Namaqualand Hardeveld Bioregion	Poorly protected
Kamiesberg Mountains Shrubland	2.7644	SKn 6	Least threatened	Succulent Karoo Biome	Namaqualand Hardeveld Bioregion	Poorly protected
Namaqualand Granite Renosterveld	5.4531	FRg 1	Least threatened	Fynbos Biome	Namaqualand Cape Shrublands Bioregion	Not protected
Namaqualand Granite Renosterveld	63.9453	FRg 1	Least threatened	Fynbos Biome	Namaqualand Cape Shrublands Bioregion	Not protected
Namaqualand Granite Renosterveld	11.9023	FRg 1	Least threatened	Fynbos Biome	Namaqualand Cape Shrublands Bioregion	Not protected
Kamiesberg Mountains Shrubland	4.3161	SKn 6	Least threatened	Succulent Karoo Biome	Namaqualand Hardeveld Bioregion	Poorly protected
Kamiesberg Mountains Shrubland	9.2097	SKn 6	Least threatened	Succulent Karoo Biome	Namaqualand Hardeveld Bioregion	Poorly protected
Namaqualand Granite Renosterveld	3.4883	FRg 1	Least threatened	Fynbos Biome	Namaqualand Cape Shrublands Bioregion	Not protected
Kamiesberg Granite Fynbos	0.9902	FFg 1	Least threatened	Fynbos Biome	Namaqualand Cape Shrublands Bioregion	Not protected
Kamiesberg Mountains Shrubland	2.7933	SKn 6	Least threatened	Succulent Karoo Biome	Namaqualand Hardeveld Bioregion	Poorly protected
Namaqualand Blomveld	30.295	SKn 3	Least threatened	Succulent Karoo Biome	Namaqualand Hardeveld Bioregion	Hardly protected
Kamiesberg Mountains Shrubland	3.3492	SKn 6	Least threatened	Succulent Karoo Biome	Namaqualand Hardeveld Bioregion	Poorly protected
Kamiesberg Mountains Shrubland	2.9915	SKn 6	Least threatened	Succulent Karoo Biome	Namaqualand Hardeveld Bioregion	Poorly protected
Namaqualand Klipkoppe Shrubland	0.2369	SKn 1	Least threatened	Succulent Karoo Biome	Namaqualand Hardeveld Bioregion	Poorly protected
Kamiesberg Mountains Shrubland	0.7944	SKn 6	Least threatened	Succulent Karoo Biome	Namaqualand Hardeveld Bioregion	Poorly protected
Namaqualand Blomveld	2.3496	SKn 3	Least threatened	Succulent Karoo Biome	Namaqualand Hardeveld Bioregion	Hardly protected
Namaqualand Klipkoppe Shrubland	0.2296	SKn 1	Least threatened	Succulent Karoo Biome	Namaqualand Hardeveld Bioregion	Poorly protected
Namaqualand Granite Renosterveld	523.07	FRg 1	Least threatened	Fynbos Biome	Namaqualand Cape Shrublands Bioregion	Not protected
Namaqualand Granite Renosterveld	11.5999	FRg 1	Least threatened	Fynbos Biome	Namaqualand Cape Shrublands Bioregion	Not protected
Kamiesberg Mountains Shrubland	2.4555	SKn 6	Least threatened	Succulent Karoo Biome	Namaqualand Hardeveld Bioregion	Poorly protected
Kamiesberg Mountains Shrubland	1.804	SKn 6	Least threatened	Succulent Karoo Biome	Namaqualand Hardeveld Bioregion	Poorly protected
Namaqualand Blomveld	11.8489	SKn 3	Least threatened	Succulent Karoo Biome	Namaqualand Hardeveld Bioregion	Hardly protected
Kamiesberg Mountains Shrubland	2.6231	SKn 6	Least threatened	Succulent Karoo Biome	Namaqualand Hardeveld Bioregion	Poorly protected
Kamiesberg Mountains Shrubland	4.0067	SKn 6	Least threatened	Succulent Karoo Biome	Namaqualand Hardeveld Bioregion	Poorly protected
Namaqualand Granite Renosterveld	3.0433	FRg 1	Least threatened	Fynbos Biome	Namaqualand Cape Shrublands Bioregion	Not protected
Kamiesberg Mountains Shrubland	9.5591	SKn 6	Least threatened	Succulent Karoo Biome	Namaqualand Hardeveld Bioregion	Poorly protected
Namaqualand Blomveld	12.901	SKn 3	Least threatened	Succulent Karoo Biome	Namaqualand Hardeveld Bioregion	Hardly protected
Kamiesberg Mountains Shrubland	3.6775	SKn 6	Least threatened	Succulent Karoo Biome	Namaqualand Hardeveld Bioregion	Poorly protected
Namaqualand Blomveld	7.6232	SKn 3	Least threatened	Succulent Karoo Biome	Namaqualand Hardeveld Bioregion	Hardly protected
Kamiesberg Mountains Shrubland	1.569	SKn 6	Least threatened	Succulent Karoo Biome	Namaqualand Hardeveld Bioregion	Poorly protected
Kamiesberg Mountains Shrubland	4.7944	SKn 6	Least threatened	Succulent Karoo Biome	Namaqualand Hardeveld Bioregion	Poorly protected
Kamiesberg Mountains Shrubland	1.5043	SKn 6	Least threatened	Succulent Karoo Biome	Namaqualand Hardeveld Bioregion	Poorly protected
Kamiesberg Mountains Shrubland	11.4898	SKn 6	Least threatened	Succulent Karoo Biome	Namaqualand Hardeveld Bioregion	Poorly protected
Namaqualand Blomveld	67.8877	SKn 3	Least threatened	Succulent Karoo Biome	Namaqualand Hardeveld Bioregion	Hardly protected
Namaqualand Heuweltjieveld	1092.17	SKn 4	Least threatened	Succulent Karoo Biome	Namaqualand Hardeveld Bioregion	Poorly protected
Kamiesberg Granite Fynbos	0.09	FFg 1	Least threatened	Fynbos Biome	Namaqualand Cape Shrublands Bioregion	Not protected
Kamiesberg Mountains Shrubland	9.7355	SKn 6	Least threatened	Succulent Karoo Biome	Namaqualand Hardeveld Bioregion	Poorly protected
Namaqualand Blomveld	9.209	SKn 3	Least threatened	Succulent Karoo Biome	Namaqualand Hardeveld Bioregion	Hardly protected
Kamiesberg Granite Fynbos	1.9055	FFg 1	Least threatened	Fynbos Biome	Namaqualand Cape Shrublands Bioregion	Not protected
Namaqualand Blomveld	14.2557	SKn 3	Least threatened	Succulent Karoo Biome	Namaqualand Hardeveld Bioregion	Hardly protected
Kamiesberg Granite Fynbos	13.0681	FFg 1	Least threatened	Fynbos Biome	Namaqualand Cape Shrublands Bioregion	Not protected
Kamiesberg Granite Fynbos	0.1068	FFg 1	Least threatened	Fynbos Biome	Namaqualand Cape Shrublands Bioregion	Not protected
Kamiesberg Granite Fynbos	1.2779	FFg 1	Least threatened	Fynbos Biome	Namaqualand Cape Shrublands Bioregion	Not protected
Kamiesberg Granite Fynbos	0.8221	FFg 1	Least threatened	Fynbos Biome	Namaqualand Cape Shrublands Bioregion	Not protected
Namaqualand Granite Renosterveld	3.8065	FRg 1	Least threatened	Fynbos Biome	Namaqualand Cape Shrublands Bioregion	Not protected
Kamiesberg Mountains Shrubland	25.2119	SKn 6	Least threatened	Succulent Karoo Biome	Namaqualand Hardeveld Bioregion	Poorly protected
Namaqualand Blomveld	31.4675	SKn 3	Least threatened	Succulent Karoo Biome	Namaqualand Hardeveld Bioregion	Hardly protected
Kamiesberg Mountains Shrubland	58.5075	SKn 6	Least threatened	Succulent Karoo Biome	Namaqualand Hardeveld Bioregion	Poorly protected
Namaqualand Blomveld	7.7937	SKn 3	Least threatened	Succulent Karoo Biome	Namaqualand Hardeveld Bioregion	Hardly protected
Namaqualand Granite Renosterveld	27.586	FRg 1	Least threatened	Fynbos Biome	Namaqualand Cape Shrublands Bioregion	Not protected
Kamiesberg Granite Fynbos	16.6258	FFg 1	Least threatened	Fynbos Biome	Namaqualand Cape Shrublands Bioregion	Not protected
Namaqualand Klipkoppe Shrubland	4.4213	SKn 1	Least threatened	Succulent Karoo Biome	Namaqualand Hardeveld Bioregion	Poorly protected
Kamiesberg Mountains Shrubland	18.6449	SKn 6	Least threatened	Succulent Karoo Biome	Namaqualand Hardeveld Bioregion	Poorly protected
Kamiesberg Granite Fynbos	0.1602	FFg 1	Least threatened	Fynbos Biome	Namaqualand Cape Shrublands Bioregion	Not protected
Namaqualand Blomveld	84.3137	SKn 3	Least threatened	Succulent Karoo Biome	Namaqualand Hardeveld Bioregion	Hardly protected
Kamiesberg Mountains Shrubland	24.6591	SKn 6	Least threatened	Succulent Karoo Biome	Namaqualand Hardeveld Bioregion	Poorly protected
Kamiesberg Mountains Shrubland	1.4065	SKn 6	Least threatened	Succulent Karoo Biome	Namaqualand Hardeveld Bioregion	Poorly protected
Namaqualand Blomveld	721.251	SKn 3	Least threatened	Succulent Karoo Biome	Namaqualand Hardeveld Bioregion	Hardly protected
Kamiesberg Mountains Shrubland	4.1806	SKn 6	Least threatened	Succulent Karoo Biome	Namaqualand Hardeveld Bioregion	Poorly protected
Kamiesberg Mountains Shrubland	0.5819	SKn 6	Least threatened	Succulent Karoo Biome	Namaqualand Hardeveld Bioregion	Poorly protected
Kamiesberg Mountains Shrubland	0.5745	SKn 6	Least threatened	Succulent Karoo Biome	Namaqualand Hardeveld Bioregion	Poorly protected
Namaqualand Granite Renosterveld	5.345	FRg 1	Least threatened	Fynbos Biome	Namaqualand Cape Shrublands Bioregion	Not protected
Namaqualand Klipkoppe Shrubland	5.4106	SKn 1	Least threatened	Succulent Karoo Biome	Namaqualand Hardeveld Bioregion	Poorly protected
Namaqualand Arid Grassland	247.817	SKs 11	Least threatened	Succulent Karoo Biome	Namaqualand Sandveld Bioregion	Moderately protected
Namaqualand Klipkoppe Shrubland	5.8971	SKn 1	Least threatened	Succulent Karoo Biome	Namaqualand Hardeveld Bioregion	Poorly protected
Richtersveld Sheet Wash Desert	26.2837	Dg 3	Least threatened	Desert Biome	Gariep Desert Bioregion	Well protected
Central Richtersveld Mountain Shrubland	1200.38	SKr 1	Least threatened	Succulent Karoo Biome	Richtersveld Bioregion	Well protected

## Sheet: CFM
Vegetation type	Polygon square kilometres (POLYSQKM)	Book code	Conservation status	Biome	Bioregion	Protection status
Hantam Karoo	7095.62	SKt 2	Least threatened	Succulent Karoo Biome	Trans-Escarpment Succulent Karoo Bioregion	Hardly protected
Namaqualand Riviere	526.947	AZi 1	Least threatened	Azonal Vegetation	Inland Saline Vegetation	Hardly protected
Knersvlakte Shale Vygieveld	833.601	SKk 4	Least threatened	Succulent Karoo Biome	Knersvlakte Bioregion	Not protected
Kamiesberg Mountains Shrubland	146.431	SKn 6	Least threatened	Succulent Karoo Biome	Namaqualand Hardeveld Bioregion	Poorly protected
Bokkeveld Sandstone Fynbos	1264.8	FFs 1	Least threatened	Fynbos Biome	Northwest Fynbos Bioregion	Poorly protected
Nieuwoudtville Shale Renosterveld	6.4635	FRs 2	Endangered	Fynbos Biome	Karoo Renosterveld Bioregion	Not protected
Nieuwoudtville Shale Renosterveld	49.9614	FRs 2	Endangered	Fynbos Biome	Karoo Renosterveld Bioregion	Not protected
Vanrhynsdorp Shale Renosterveld	188.264	FRs 1	Least threatened	Fynbos Biome	Karoo Renosterveld Bioregion	Poorly protected
Bokkeveld Sandstone Fynbos	5.7597	FFs 1	Least threatened	Fynbos Biome	Northwest Fynbos Bioregion	Poorly protected
Vanrhynsdorp Gannabosveld	671.699	SKk 5	Vulnerable	Succulent Karoo Biome	Knersvlakte Bioregion	Not protected
Bokkeveld Sandstone Fynbos	32.1698	FFs 1	Least threatened	Fynbos Biome	Northwest Fynbos Bioregion	Poorly protected
Bokkeveld Sandstone Fynbos	22.9384	FFs 1	Least threatened	Fynbos Biome	Northwest Fynbos Bioregion	Poorly protected
Bokkeveld Sandstone Fynbos	0.9506	FFs 1	Least threatened	Fynbos Biome	Northwest Fynbos Bioregion	Poorly protected
Bokkeveld Sandstone Fynbos	22.2423	FFs 1	Least threatened	Fynbos Biome	Northwest Fynbos Bioregion	Poorly protected
Knersvlakte Dolomite Vygieveld	57.9567	SKk 6	Least threatened	Succulent Karoo Biome	Knersvlakte Bioregion	Not protected
Bokkeveld Sandstone Fynbos	0.7303	FFs 1	Least threatened	Fynbos Biome	Northwest Fynbos Bioregion	Poorly protected
Tanqua Karoo	3112.78	SKv 5	Least threatened	Succulent Karoo Biome	Rainshadow Valley Karoo Bioregion	Poorly protected
Southern Karoo Riviere	2369.36	AZi 6	Least threatened	Azonal Vegetation	Inland Saline Vegetation	Hardly protected
Bokkeveld Sandstone Fynbos	0.2098	FFs 1	Least threatened	Fynbos Biome	Northwest Fynbos Bioregion	Poorly protected
Bokkeveld Sandstone Fynbos	0.7291	FFs 1	Least threatened	Fynbos Biome	Northwest Fynbos Bioregion	Poorly protected
Leipoldtville Sand Fynbos	2329.81	FFd 2	Endangered	Fynbos Biome	Northwest Fynbos Bioregion	Hardly protected
Vanrhynsdorp Shale Renosterveld	40.1802	FRs 1	Least threatened	Fynbos Biome	Karoo Renosterveld Bioregion	Poorly protected
Klawer Sandy Shrubland	97.2209	SKs 13	Least threatened	Succulent Karoo Biome	Namaqualand Sandveld Bioregion	Not protected
Bokkeveld Sandstone Fynbos	0.1765	FFs 1	Least threatened	Fynbos Biome	Northwest Fynbos Bioregion	Poorly protected
Bokkeveld Sandstone Fynbos	0.1446	FFs 1	Least threatened	Fynbos Biome	Northwest Fynbos Bioregion	Poorly protected
Bokkeveld Sandstone Fynbos	1.4936	FFs 1	Least threatened	Fynbos Biome	Northwest Fynbos Bioregion	Poorly protected
Klawer Sandy Shrubland	27.0249	SKs 13	Least threatened	Succulent Karoo Biome	Namaqualand Sandveld Bioregion	Not protected
Bokkeveld Sandstone Fynbos	0.8509	FFs 1	Least threatened	Fynbos Biome	Northwest Fynbos Bioregion	Poorly protected
Vanrhynsdorp Gannabosveld	3.6457	SKk 5	Vulnerable	Succulent Karoo Biome	Knersvlakte Bioregion	Not protected
Vanrhynsdorp Shale Renosterveld	6.8091	FRs 1	Least threatened	Fynbos Biome	Karoo Renosterveld Bioregion	Poorly protected
Bokkeveld Sandstone Fynbos	4.4788	FFs 1	Least threatened	Fynbos Biome	Northwest Fynbos Bioregion	Poorly protected
Vanrhynsdorp Gannabosveld	0.866	SKk 5	Vulnerable	Succulent Karoo Biome	Knersvlakte Bioregion	Not protected
Doringrivier Quartzite Karoo	405.342	SKv 1	Least threatened	Succulent Karoo Biome	Rainshadow Valley Karoo Bioregion	Not protected
Vanrhynsdorp Gannabosveld	1.6508	SKk 5	Vulnerable	Succulent Karoo Biome	Knersvlakte Bioregion	Not protected
Vanrhynsdorp Shale Renosterveld	0.1677	FRs 1	Least threatened	Fynbos Biome	Karoo Renosterveld Bioregion	Poorly protected
Vanrhynsdorp Shale Renosterveld	3.7365	FRs 1	Least threatened	Fynbos Biome	Karoo Renosterveld Bioregion	Poorly protected
Bokkeveld Sandstone Fynbos	0.3511	FFs 1	Least threatened	Fynbos Biome	Northwest Fynbos Bioregion	Poorly protected
Vanrhynsdorp Gannabosveld	41.0767	SKk 5	Vulnerable	Succulent Karoo Biome	Knersvlakte Bioregion	Not protected
Tanqua Wash Riviere	1993.63	AZi 7	Least threatened	Azonal Vegetation	Inland Saline Vegetation	Moderately protected
Cederberg Sandstone Fynbos	2123.82	FFs 4	Least threatened	Fynbos Biome	Northwest Fynbos Bioregion	Moderately protected
Graafwater Sandstone Fynbos	1163.15	FFs 2	Vulnerable	Fynbos Biome	Northwest Fynbos Bioregion	Not protected
Agter-Sederberg Shrubland	381.244	SKv 3	Least threatened	Succulent Karoo Biome	Rainshadow Valley Karoo Bioregion	Poorly protected
Leipoldtville Sand Fynbos	204.386	FFd 2	Endangered	Fynbos Biome	Northwest Fynbos Bioregion	Hardly protected
Olifants Sandstone Fynbos	7.4169	FFs 3	Least threatened	Fynbos Biome	Northwest Fynbos Bioregion	Moderately protected
Citrusdal Vygieveld	5.1531	SKk 7	Vulnerable	Succulent Karoo Biome	Knersvlakte Bioregion	Not protected
Gamka Karoo	16993	NKl 1	Least threatened	Nama-Karoo Biome	Lower Karoo Bioregion	Poorly protected
Northern Inland Shale Band Vegetation	7.9509	FFb 1	Least threatened	Fynbos Biome	Northwest Fynbos Bioregion	Moderately protected
Olifants Sandstone Fynbos	1020.1	FFs 3	Least threatened	Fynbos Biome	Northwest Fynbos Bioregion	Moderately protected
Citrusdal Vygieveld	22.2275	SKk 7	Vulnerable	Succulent Karoo Biome	Knersvlakte Bioregion	Not protected
Citrusdal Vygieveld	16.6337	SKk 7	Vulnerable	Succulent Karoo Biome	Knersvlakte Bioregion	Not protected
Citrusdal Vygieveld	2.9987	SKk 7	Vulnerable	Succulent Karoo Biome	Knersvlakte Bioregion	Not protected
Olifants Sandstone Fynbos	0.3278	FFs 3	Least threatened	Fynbos Biome	Northwest Fynbos Bioregion	Moderately protected
Northern Inland Shale Band Vegetation	27.4639	FFb 1	Least threatened	Fynbos Biome	Northwest Fynbos Bioregion	Moderately protected
Swartruggens Quartzite Fynbos	158.582	FFq 2	Least threatened	Fynbos Biome	Northwest Fynbos Bioregion	Poorly protected
Fynbos Riparian Vegetation	0.4067	AZa 1	See text	Azonal Vegetation	Alluvial Vegetation
Swartruggens Quartzite Fynbos	0.9767	FFq 2	Least threatened	Fynbos Biome	Northwest Fynbos Bioregion	Poorly protected
Fynbos Riparian Vegetation	0.5432	AZa 1	See text	Azonal Vegetation	Alluvial Vegetation
Cederberg Sandstone Fynbos	62.3656	FFs 4	Least threatened	Fynbos Biome	Northwest Fynbos Bioregion	Moderately protected
Fynbos Riparian Vegetation	0.2445	AZa 1	See text	Azonal Vegetation	Alluvial Vegetation
Agter-Sederberg Shrubland	173.803	SKv 3	Least threatened	Succulent Karoo Biome	Rainshadow Valley Karoo Bioregion	Poorly protected
Swartruggens Quartzite Fynbos	0.1125	FFq 2	Least threatened	Fynbos Biome	Northwest Fynbos Bioregion	Poorly protected
Fynbos Riparian Vegetation	0.1725	AZa 1	See text	Azonal Vegetation	Alluvial Vegetation
Citrusdal Vygieveld	1.9551	SKk 7	Vulnerable	Succulent Karoo Biome	Knersvlakte Bioregion	Not protected
Southern Karoo Riviere	328.77	AZi 6	Least threatened	Azonal Vegetation	Inland Saline Vegetation	Hardly protected
Eastern Lower Karoo	5421.14	NKl 2	Least threatened	Nama-Karoo Biome	Lower Karoo Bioregion	Hardly protected
Tanqua Karoo	34.1253	SKv 5	Least threatened	Succulent Karoo Biome	Rainshadow Valley Karoo Bioregion	Poorly protected
Swartruggens Quartzite Karoo	553.797	SKv 2	Least threatened	Succulent Karoo Biome	Rainshadow Valley Karoo Bioregion	Poorly protected
Agter-Sederberg Shrubland	2.9471	SKv 3	Least threatened	Succulent Karoo Biome	Rainshadow Valley Karoo Bioregion	Poorly protected
Fynbos Riparian Vegetation	5.0604	AZa 1	See text	Azonal Vegetation	Alluvial Vegetation
Cederberg Sandstone Fynbos	2.4554	FFs 4	Least threatened	Fynbos Biome	Northwest Fynbos Bioregion	Moderately protected
Swartruggens Quartzite Fynbos	341.384	FFq 2	Least threatened	Fynbos Biome	Northwest Fynbos Bioregion	Poorly protected
Citrusdal Vygieveld	5.2128	SKk 7	Vulnerable	Succulent Karoo Biome	Knersvlakte Bioregion	Not protected
Cederberg Sandstone Fynbos	29.4515	FFs 4	Least threatened	Fynbos Biome	Northwest Fynbos Bioregion	Moderately protected
Olifants Sandstone Fynbos	9.2158	FFs 3	Least threatened	Fynbos Biome	Northwest Fynbos Bioregion	Moderately protected
Fynbos Riparian Vegetation	0.6126	AZa 1	See text	Azonal Vegetation	Alluvial Vegetation
Leipoldtville Sand Fynbos	9.1857	FFd 2	Endangered	Fynbos Biome	Northwest Fynbos Bioregion	Hardly protected
Olifants Sandstone Fynbos	0.8916	FFs 3	Least threatened	Fynbos Biome	Northwest Fynbos Bioregion	Moderately protected
Cederberg Sandstone Fynbos	210.111	FFs 4	Least threatened	Fynbos Biome	Northwest Fynbos Bioregion	Moderately protected
Fynbos Riparian Vegetation	2.0132	AZa 1	See text	Azonal Vegetation	Alluvial Vegetation
Cederberg Sandstone Fynbos	1.9417	FFs 4	Least threatened	Fynbos Biome	Northwest Fynbos Bioregion	Moderately protected
Western Altimontane Sandstone Fynbos	1.0054	FFs 30	Least threatened	Fynbos Biome	Northwest Fynbos Bioregion	Well protected
Citrusdal Vygieveld	9.8352	SKk 7	Vulnerable	Succulent Karoo Biome	Knersvlakte Bioregion	Not protected
Northern Inland Shale Band Vegetation	1.0926	FFb 1	Least threatened	Fynbos Biome	Northwest Fynbos Bioregion	Moderately protected
Fynbos Riparian Vegetation	0.1735	AZa 1	See text	Azonal Vegetation	Alluvial Vegetation
Olifants Sandstone Fynbos	2.1422	FFs 3	Least threatened	Fynbos Biome	Northwest Fynbos Bioregion	Moderately protected
Western Altimontane Sandstone Fynbos	0.4082	FFs 30	Least threatened	Fynbos Biome	Northwest Fynbos Bioregion	Well protected
Fynbos Riparian Vegetation	0.4008	AZa 1	See text	Azonal Vegetation	Alluvial Vegetation
Northern Inland Shale Band Vegetation	4.5668	FFb 1	Least threatened	Fynbos Biome	Northwest Fynbos Bioregion	Moderately protected
Cederberg Sandstone Fynbos	3.4119	FFs 4	Least threatened	Fynbos Biome	Northwest Fynbos Bioregion	Moderately protected
Fynbos Riparian Vegetation	5.133	AZa 1	See text	Azonal Vegetation	Alluvial Vegetation
Olifants Sandstone Fynbos	7.3924	FFs 3	Least threatened	Fynbos Biome	Northwest Fynbos Bioregion	Moderately protected
Citrusdal Vygieveld	0.3056	SKk 7	Vulnerable	Succulent Karoo Biome	Knersvlakte Bioregion	Not protected
Citrusdal Vygieveld	1.0017	SKk 7	Vulnerable	Succulent Karoo Biome	Knersvlakte Bioregion	Not protected
Olifants Sandstone Fynbos	4.9034	FFs 3	Least threatened	Fynbos Biome	Northwest Fynbos Bioregion	Moderately protected
Citrusdal Vygieveld	33.4493	SKk 7	Vulnerable	Succulent Karoo Biome	Knersvlakte Bioregion	Not protected
Koedoesberge-Moordenaars Karoo	4714.5	SKv 6	Least threatened	Succulent Karoo Biome	Rainshadow Valley Karoo Bioregion	Hardly protected
Olifants Sandstone Fynbos	2.3396	FFs 3	Least threatened	Fynbos Biome	Northwest Fynbos Bioregion	Moderately protected
Northern Inland Shale Band Vegetation	2.3002	FFb 1	Least threatened	Fynbos Biome	Northwest Fynbos Bioregion	Moderately protected
Swartland Shale Renosterveld	4494.32	FRs 9	Critically endangered	Fynbos Biome	West Coast Renosterveld Bioregion	Hardly protected
Northern Inland Shale Band Vegetation	10.417	FFb 1	Least threatened	Fynbos Biome	Northwest Fynbos Bioregion	Moderately protected
Northern Inland Shale Band Vegetation	6.8165	FFb 1	Least threatened	Fynbos Biome	Northwest Fynbos Bioregion	Moderately protected
Cederberg Sandstone Fynbos	3.4657	FFs 4	Least threatened	Fynbos Biome	Northwest Fynbos Bioregion	Moderately protected
Western Altimontane Sandstone Fynbos	0.8805	FFs 30	Least threatened	Fynbos Biome	Northwest Fynbos Bioregion	Well protected
Leipoldtville Sand Fynbos	94.885	FFd 2	Endangered	Fynbos Biome	Northwest Fynbos Bioregion	Hardly protected
Northern Inland Shale Band Vegetation	1.7837	FFb 1	Least threatened	Fynbos Biome	Northwest Fynbos Bioregion	Moderately protected
Fynbos Riparian Vegetation	2.1265	AZa 1	See text	Azonal Vegetation	Alluvial Vegetation
Cederberg Sandstone Fynbos	0.2079	FFs 4	Least threatened	Fynbos Biome	Northwest Fynbos Bioregion	Moderately protected
Northern Inland Shale Band Vegetation	16.355	FFb 1	Least threatened	Fynbos Biome	Northwest Fynbos Bioregion	Moderately protected
Tanqua Karoo	166.328	SKv 5	Least threatened	Succulent Karoo Biome	Rainshadow Valley Karoo Bioregion	Poorly protected
Citrusdal Vygieveld	0.9348	SKk 7	Vulnerable	Succulent Karoo Biome	Knersvlakte Bioregion	Not protected
Cederberg Sandstone Fynbos	6.5494	FFs 4	Least threatened	Fynbos Biome	Northwest Fynbos Bioregion	Moderately protected
Swartruggens Quartzite Fynbos	1143.38	FFq 2	Least threatened	Fynbos Biome	Northwest Fynbos Bioregion	Poorly protected
Piketberg Sandstone Fynbos	33.8727	FFs 6	Least threatened	Fynbos Biome	Northwest Fynbos Bioregion	Not protected
Northern Inland Shale Band Vegetation	5.838	FFb 1	Least threatened	Fynbos Biome	Northwest Fynbos Bioregion	Moderately protected
Northern Inland Shale Band Vegetation	5.3885	FFb 1	Least threatened	Fynbos Biome	Northwest Fynbos Bioregion	Moderately protected
Cederberg Sandstone Fynbos	4.4836	FFs 4	Least threatened	Fynbos Biome	Northwest Fynbos Bioregion	Moderately protected
Hopefield Sand Fynbos	1736.94	FFd 3	Endangered	Fynbos Biome	Southwest Fynbos Bioregion	Hardly protected
Northern Inland Shale Band Vegetation	5.7547	FFb 1	Least threatened	Fynbos Biome	Northwest Fynbos Bioregion	Moderately protected
Leipoldtville Sand Fynbos	2.5408	FFd 2	Endangered	Fynbos Biome	Northwest Fynbos Bioregion	Hardly protected
Leipoldtville Sand Fynbos	49.3404	FFd 2	Endangered	Fynbos Biome	Northwest Fynbos Bioregion	Hardly protected
Leipoldtville Sand Fynbos	1.8695	FFd 2	Endangered	Fynbos Biome	Northwest Fynbos Bioregion	Hardly protected
Northern Inland Shale Band Vegetation	11.1348	FFb 1	Least threatened	Fynbos Biome	Northwest Fynbos Bioregion	Moderately protected
Northern Inland Shale Band Vegetation	12.1573	FFb 1	Least threatened	Fynbos Biome	Northwest Fynbos Bioregion	Moderately protected
Piketberg Sandstone Fynbos	12.4244	FFs 6	Least threatened	Fynbos Biome	Northwest Fynbos Bioregion	Not protected
Piketberg Sandstone Fynbos	407.872	FFs 6	Least threatened	Fynbos Biome	Northwest Fynbos Bioregion	Not protected
Northern Inland Shale Band Vegetation	3.4304	FFb 1	Least threatened	Fynbos Biome	Northwest Fynbos Bioregion	Moderately protected
Great Fish Thicket	4247.43	AT 11	Least threatened	Albany Thicket Biome	Albany Thicket	Poorly protected
Piketberg Sandstone Fynbos	3.769	FFs 6	Least threatened	Fynbos Biome	Northwest Fynbos Bioregion	Not protected
Swartland Shale Renosterveld	1.0554	FRs 9	Critically endangered	Fynbos Biome	West Coast Renosterveld Bioregion	Hardly protected
Swartland Shale Renosterveld	31.6398	FRs 9	Critically endangered	Fynbos Biome	West Coast Renosterveld Bioregion	Hardly protected
Northern Inland Shale Band Vegetation	0.6398	FFb 1	Least threatened	Fynbos Biome	Northwest Fynbos Bioregion	Moderately protected
Northern Inland Shale Band Vegetation	28.1437	FFb 1	Least threatened	Fynbos Biome	Northwest Fynbos Bioregion	Moderately protected
Piketberg Sandstone Fynbos	0.1496	FFs 6	Least threatened	Fynbos Biome	Northwest Fynbos Bioregion	Not protected
Piketberg Sandstone Fynbos	0.256	FFs 6	Least threatened	Fynbos Biome	Northwest Fynbos Bioregion	Not protected
Swartland Shale Renosterveld	0.349	FRs 9	Critically endangered	Fynbos Biome	West Coast Renosterveld Bioregion	Hardly protected
Northern Inland Shale Band Vegetation	1.0851	FFb 1	Least threatened	Fynbos Biome	Northwest Fynbos Bioregion	Moderately protected
Piketberg Sandstone Fynbos	0.6228	FFs 6	Least threatened	Fynbos Biome	Northwest Fynbos Bioregion	Not protected
Swartland Shale Renosterveld	0.4095	FRs 9	Critically endangered	Fynbos Biome	West Coast Renosterveld Bioregion	Hardly protected
Sundays Thicket	2412.75	AT 6	Least threatened	Albany Thicket Biome	Albany Thicket	Poorly protected
Northern Inland Shale Band Vegetation	0.1888	FFb 1	Least threatened	Fynbos Biome	Northwest Fynbos Bioregion	Moderately protected
Swartland Shale Renosterveld	0.3302	FRs 9	Critically endangered	Fynbos Biome	West Coast Renosterveld Bioregion	Hardly protected
Northern Inland Shale Band Vegetation	4.1609	FFb 1	Least threatened	Fynbos Biome	Northwest Fynbos Bioregion	Moderately protected
Cederberg Sandstone Fynbos	0.3123	FFs 4	Least threatened	Fynbos Biome	Northwest Fynbos Bioregion	Moderately protected
Leipoldtville Sand Fynbos	1.1902	FFd 2	Endangered	Fynbos Biome	Northwest Fynbos Bioregion	Hardly protected
Piketberg Sandstone Fynbos	0.7102	FFs 6	Least threatened	Fynbos Biome	Northwest Fynbos Bioregion	Not protected
Swartland Shale Renosterveld	0.3741	FRs 9	Critically endangered	Fynbos Biome	West Coast Renosterveld Bioregion	Hardly protected
Swartland Silcrete Renosterveld	0.1547	FRc 1	Critically endangered	Fynbos Biome	West Coast Renosterveld Bioregion	Hardly protected
Kouebokkeveld Alluvium Fynbos	6.534	FFa 1	Endangered	Fynbos Biome	Northwest Fynbos Bioregion	Not protected
Swartland Shale Renosterveld	1.6122	FRs 9	Critically endangered	Fynbos Biome	West Coast Renosterveld Bioregion	Hardly protected
Northern Inland Shale Band Vegetation	20.4799	FFb 1	Least threatened	Fynbos Biome	Northwest Fynbos Bioregion	Moderately protected
Ceres Shale Renosterveld	15.3609	FRs 4	Vulnerable	Fynbos Biome	Western Fynbos-Renosterveld Bioregion	Hardly protected
Swartland Silcrete Renosterveld	1.1777	FRc 1	Critically endangered	Fynbos Biome	West Coast Renosterveld Bioregion	Hardly protected
Kouebokkeveld Alluvium Fynbos	80.2574	FFa 1	Endangered	Fynbos Biome	Northwest Fynbos Bioregion	Not protected
Swartland Shale Renosterveld	0.1299	FRs 9	Critically endangered	Fynbos Biome	West Coast Renosterveld Bioregion	Hardly protected
Kouebokkeveld Alluvium Fynbos	0.8725	FFa 1	Endangered	Fynbos Biome	Northwest Fynbos Bioregion	Not protected
Kouebokkeveld Alluvium Fynbos	11.2699	FFa 1	Endangered	Fynbos Biome	Northwest Fynbos Bioregion	Not protected
Leipoldtville Sand Fynbos	1.0786	FFd 2	Endangered	Fynbos Biome	Northwest Fynbos Bioregion	Hardly protected
Leipoldtville Sand Fynbos	0.133	FFd 2	Endangered	Fynbos Biome	Northwest Fynbos Bioregion	Hardly protected
Leipoldtville Sand Fynbos	1.7051	FFd 2	Endangered	Fynbos Biome	Northwest Fynbos Bioregion	Hardly protected
Kouebokkeveld Shale Fynbos	3.1583	FFh 1	Endangered	Fynbos Biome	Northwest Fynbos Bioregion	Not protected
Groot Thicket	140.882	AT 3	Least threatened	Albany Thicket Biome	Albany Thicket	Moderately protected
Leipoldtville Sand Fynbos	2.2799	FFd 2	Endangered	Fynbos Biome	Northwest Fynbos Bioregion	Hardly protected
Northern Inland Shale Band Vegetation	4.4589	FFb 1	Least threatened	Fynbos Biome	Northwest Fynbos Bioregion	Moderately protected
Swartland Shale Renosterveld	0.6123	FRs 9	Critically endangered	Fynbos Biome	West Coast Renosterveld Bioregion	Hardly protected
Kouebokkeveld Shale Fynbos	0.5823	FFh 1	Endangered	Fynbos Biome	Northwest Fynbos Bioregion	Not protected
Northern Inland Shale Band Vegetation	1.464	FFb 1	Least threatened	Fynbos Biome	Northwest Fynbos Bioregion	Moderately protected
Kouebokkeveld Shale Fynbos	153.948	FFh 1	Endangered	Fynbos Biome	Northwest Fynbos Bioregion	Not protected
Swartland Shale Renosterveld	0.4004	FRs 9	Critically endangered	Fynbos Biome	West Coast Renosterveld Bioregion	Hardly protected
Western Altimontane Sandstone Fynbos	2.2824	FFs 30	Least threatened	Fynbos Biome	Northwest Fynbos Bioregion	Well protected
Winterhoek Sandstone Fynbos	946.314	FFs 5	Least threatened	Fynbos Biome	Northwest Fynbos Bioregion	Moderately protected
Leipoldtville Sand Fynbos	1.3689	FFd 2	Endangered	Fynbos Biome	Northwest Fynbos Bioregion	Hardly protected
Northern Inland Shale Band Vegetation	5.3987	FFb 1	Least threatened	Fynbos Biome	Northwest Fynbos Bioregion	Moderately protected
Winterhoek Sandstone Fynbos	1.3591	FFs 5	Least threatened	Fynbos Biome	Northwest Fynbos Bioregion	Moderately protected
Swartland Shale Renosterveld	1.9219	FRs 9	Critically endangered	Fynbos Biome	West Coast Renosterveld Bioregion	Hardly protected
Kouebokkeveld Alluvium Fynbos	6.8361	FFa 1	Endangered	Fynbos Biome	Northwest Fynbos Bioregion	Not protected
Kouebokkeveld Shale Fynbos	2.787	FFh 1	Endangered	Fynbos Biome	Northwest Fynbos Bioregion	Not protected
Northern Inland Shale Band Vegetation	14.7683	FFb 1	Least threatened	Fynbos Biome	Northwest Fynbos Bioregion	Moderately protected
Kouebokkeveld Alluvium Fynbos	6.7591	FFa 1	Endangered	Fynbos Biome	Northwest Fynbos Bioregion	Not protected
Swartland Silcrete Renosterveld	0.2067	FRc 1	Critically endangered	Fynbos Biome	West Coast Renosterveld Bioregion	Hardly protected
Tanqua Karoo	224.143	SKv 5	Least threatened	Succulent Karoo Biome	Rainshadow Valley Karoo Bioregion	Poorly protected
Kouebokkeveld Shale Fynbos	10.2051	FFh 1	Endangered	Fynbos Biome	Northwest Fynbos Bioregion	Not protected
Northern Inland Shale Band Vegetation	1.7707	FFb 1	Least threatened	Fynbos Biome	Northwest Fynbos Bioregion	Moderately protected
Groot Thicket	106.613	AT 3	Least threatened	Albany Thicket Biome	Albany Thicket	Moderately protected
Swartland Silcrete Renosterveld	0.1	FRc 1	Critically endangered	Fynbos Biome	West Coast Renosterveld Bioregion	Hardly protected
Kouebokkeveld Shale Fynbos	0.7939	FFh 1	Endangered	Fynbos Biome	Northwest Fynbos Bioregion	Not protected
Tanqua Karoo	723.208	SKv 5	Least threatened	Succulent Karoo Biome	Rainshadow Valley Karoo Bioregion	Poorly protected
Kouebokkeveld Alluvium Fynbos	62.752	FFa 1	Endangered	Fynbos Biome	Northwest Fynbos Bioregion	Not protected
Winterhoek Sandstone Fynbos	1.607	FFs 5	Least threatened	Fynbos Biome	Northwest Fynbos Bioregion	Moderately protected
Kouebokkeveld Shale Fynbos	5.5887	FFh 1	Endangered	Fynbos Biome	Northwest Fynbos Bioregion	Not protected
Northern Inland Shale Band Vegetation	30.9912	FFb 1	Least threatened	Fynbos Biome	Northwest Fynbos Bioregion	Moderately protected
Kouebokkeveld Alluvium Fynbos	4.2382	FFa 1	Endangered	Fynbos Biome	Northwest Fynbos Bioregion	Not protected
Kouebokkeveld Alluvium Fynbos	0.5344	FFa 1	Endangered	Fynbos Biome	Northwest Fynbos Bioregion	Not protected
Winterhoek Sandstone Fynbos	3.1865	FFs 5	Least threatened	Fynbos Biome	Northwest Fynbos Bioregion	Moderately protected
Kouebokkeveld Shale Fynbos	151.955	FFh 1	Endangered	Fynbos Biome	Northwest Fynbos Bioregion	Not protected
Olifants Sandstone Fynbos	0.3384	FFs 3	Least threatened	Fynbos Biome	Northwest Fynbos Bioregion	Moderately protected
Winterhoek Sandstone Fynbos	237.158	FFs 5	Least threatened	Fynbos Biome	Northwest Fynbos Bioregion	Moderately protected
Swartland Alluvium Fynbos	0.4358	FFa 3	Critically endangered	Fynbos Biome	Southwest Fynbos Bioregion	Poorly protected
Albany Broken Veld	1157.04	NKl 4	Least threatened	Nama-Karoo Biome	Lower Karoo Bioregion	Hardly protected
Swartland Alluvium Fynbos	77.4161	FFa 3	Critically endangered	Fynbos Biome	Southwest Fynbos Bioregion	Poorly protected
Albany Broken Veld	211.201	NKl 4	Least threatened	Nama-Karoo Biome	Lower Karoo Bioregion	Hardly protected
Swartland Alluvium Fynbos	0.6334	FFa 3	Critically endangered	Fynbos Biome	Southwest Fynbos Bioregion	Poorly protected
Swartland Alluvium Fynbos	2.2016	FFa 3	Critically endangered	Fynbos Biome	Southwest Fynbos Bioregion	Poorly protected
Groot Thicket	292.591	AT 3	Least threatened	Albany Thicket Biome	Albany Thicket	Moderately protected
Swartland Shale Renosterveld	4.4764	FRs 9	Critically endangered	Fynbos Biome	West Coast Renosterveld Bioregion	Hardly protected
Prince Albert Succulent Karoo	1934.7	SKv 13	Least threatened	Succulent Karoo Biome	Rainshadow Valley Karoo Bioregion	Poorly protected
Swartruggens Quartzite Karoo	2.6189	SKv 2	Least threatened	Succulent Karoo Biome	Rainshadow Valley Karoo Bioregion	Poorly protected
Grootrivier Quartzite Fynbos	84.0678	FFq 5	Least threatened	Fynbos Biome	Eastern Fynbos-Renosterveld Bioregion	Not protected
Northern Inland Shale Band Vegetation	6.0427	FFb 1	Least threatened	Fynbos Biome	Northwest Fynbos Bioregion	Moderately protected
Great Fish Noorsveld	673.925	AT 10	Least threatened	Albany Thicket Biome	Albany Thicket	Poorly protected
Swartland Silcrete Renosterveld	0.143	FRc 1	Critically endangered	Fynbos Biome	West Coast Renosterveld Bioregion	Hardly protected
Uniondale Shale Renosterveld	0.2726	FRs 16	Least threatened	Fynbos Biome	Eastern Fynbos-Renosterveld Bioregion	Hardly protected
Swartland Shale Renosterveld	1.2137	FRs 9	Critically endangered	Fynbos Biome	West Coast Renosterveld Bioregion	Hardly protected
Uniondale Shale Renosterveld	1.7845	FRs 16	Least threatened	Fynbos Biome	Eastern Fynbos-Renosterveld Bioregion	Hardly protected
Southern Karoo Riviere	295.258	AZi 6	Least threatened	Azonal Vegetation	Inland Saline Vegetation	Hardly protected
Ceres Shale Renosterveld	85.6586	FRs 4	Vulnerable	Fynbos Biome	Western Fynbos-Renosterveld Bioregion	Hardly protected
Swartland Shale Renosterveld	0.3594	FRs 9	Critically endangered	Fynbos Biome	West Coast Renosterveld Bioregion	Hardly protected
Western Altimontane Sandstone Fynbos	0.7367	FFs 30	Least threatened	Fynbos Biome	Northwest Fynbos Bioregion	Well protected
Grootrivier Quartzite Fynbos	162.584	FFq 5	Least threatened	Fynbos Biome	Eastern Fynbos-Renosterveld Bioregion	Not protected
Uniondale Shale Renosterveld	7.1112	FRs 16	Least threatened	Fynbos Biome	Eastern Fynbos-Renosterveld Bioregion	Hardly protected
Swartland Shale Renosterveld	1.9528	FRs 9	Critically endangered	Fynbos Biome	West Coast Renosterveld Bioregion	Hardly protected
Western Altimontane Sandstone Fynbos	1.3086	FFs 30	Least threatened	Fynbos Biome	Northwest Fynbos Bioregion	Well protected
Ceres Shale Renosterveld	80.6723	FRs 4	Vulnerable	Fynbos Biome	Western Fynbos-Renosterveld Bioregion	Hardly protected
Tanqua Wash Riviere	0.5436	AZi 7	Least threatened	Azonal Vegetation	Inland Saline Vegetation	Moderately protected
Grootrivier Quartzite Fynbos	13.7888	FFq 5	Least threatened	Fynbos Biome	Eastern Fynbos-Renosterveld Bioregion	Not protected
Kowie Thicket	267.399	AT 8	Least threatened	Albany Thicket Biome	Albany Thicket	Poorly protected
Tanqua Karoo	21.8249	SKv 5	Least threatened	Succulent Karoo Biome	Rainshadow Valley Karoo Bioregion	Poorly protected
Groot Thicket	31.0747	AT 3	Least threatened	Albany Thicket Biome	Albany Thicket	Moderately protected
Grootrivier Quartzite Fynbos	15.6565	FFq 5	Least threatened	Fynbos Biome	Eastern Fynbos-Renosterveld Bioregion	Not protected
Swartland Shale Renosterveld	0.3137	FRs 9	Critically endangered	Fynbos Biome	West Coast Renosterveld Bioregion	Hardly protected
Swartruggens Quartzite Karoo	0.6665	SKv 2	Least threatened	Succulent Karoo Biome	Rainshadow Valley Karoo Bioregion	Poorly protected
Uniondale Shale Renosterveld	6.838	FRs 16	Least threatened	Fynbos Biome	Eastern Fynbos-Renosterveld Bioregion	Hardly protected
Swartland Shale Renosterveld	2.0709	FRs 9	Critically endangered	Fynbos Biome	West Coast Renosterveld Bioregion	Hardly protected
Grootrivier Quartzite Fynbos	46.8654	FFq 5	Least threatened	Fynbos Biome	Eastern Fynbos-Renosterveld Bioregion	Not protected
Northern Inland Shale Band Vegetation	3.8497	FFb 1	Least threatened	Fynbos Biome	Northwest Fynbos Bioregion	Moderately protected
Northern Inland Shale Band Vegetation	0.4964	FFb 1	Least threatened	Fynbos Biome	Northwest Fynbos Bioregion	Moderately protected
Breede Shale Fynbos	119.248	FFh 4	Vulnerable	Fynbos Biome	Southwest Fynbos Bioregion	Poorly protected
Uniondale Shale Renosterveld	28.1051	FRs 16	Least threatened	Fynbos Biome	Eastern Fynbos-Renosterveld Bioregion	Hardly protected
Grootrivier Quartzite Fynbos	13.573	FFq 5	Least threatened	Fynbos Biome	Eastern Fynbos-Renosterveld Bioregion	Not protected
Uniondale Shale Renosterveld	1.4423	FRs 16	Least threatened	Fynbos Biome	Eastern Fynbos-Renosterveld Bioregion	Hardly protected
Swartland Shale Renosterveld	3.4997	FRs 9	Critically endangered	Fynbos Biome	West Coast Renosterveld Bioregion	Hardly protected
Groot Thicket	0.4216	AT 3	Least threatened	Albany Thicket Biome	Albany Thicket	Moderately protected
Southern Karoo Riviere	2.0748	AZi 6	Least threatened	Azonal Vegetation	Inland Saline Vegetation	Hardly protected
Groot Thicket	0.1395	AT 3	Least threatened	Albany Thicket Biome	Albany Thicket	Moderately protected
Groot Thicket	0.7043	AT 3	Least threatened	Albany Thicket Biome	Albany Thicket	Moderately protected
Groot Thicket	1.2588	AT 3	Least threatened	Albany Thicket Biome	Albany Thicket	Moderately protected
Matjiesfontein Shale Renosterveld	1637.52	FRs 6	Least threatened	Fynbos Biome	Western Fynbos-Renosterveld Bioregion	Poorly protected
Southern Karoo Riviere	0.1715	AZi 6	Least threatened	Azonal Vegetation	Inland Saline Vegetation	Hardly protected
Uniondale Shale Renosterveld	0.716	FRs 16	Least threatened	Fynbos Biome	Eastern Fynbos-Renosterveld Bioregion	Hardly protected
Groot Thicket	122.745	AT 3	Least threatened	Albany Thicket Biome	Albany Thicket	Moderately protected
Kouebokkeveld Shale Fynbos	59.4634	FFh 1	Endangered	Fynbos Biome	Northwest Fynbos Bioregion	Not protected
Prince Albert Succulent Karoo	58.5258	SKv 13	Least threatened	Succulent Karoo Biome	Rainshadow Valley Karoo Bioregion	Poorly protected
Swartruggens Quartzite Karoo	1.3499	SKv 2	Least threatened	Succulent Karoo Biome	Rainshadow Valley Karoo Bioregion	Poorly protected
Suurberg Shale Fynbos	0.4271	FFh 10	Least threatened	Fynbos Biome	Eastern Fynbos-Renosterveld Bioregion	Well protected
Matjiesfontein Quartzite Fynbos	42.7607	FFq 3	Least threatened	Fynbos Biome	Western Fynbos-Renosterveld Bioregion	Poorly protected
Suurberg Quartzite Fynbos	59.9732	FFq 6	Least threatened	Fynbos Biome	Eastern Fynbos-Renosterveld Bioregion	Moderately protected
Winterhoek Sandstone Fynbos	0.3976	FFs 5	Least threatened	Fynbos Biome	Northwest Fynbos Bioregion	Moderately protected
Suurberg Shale Fynbos	0.1217	FFh 10	Least threatened	Fynbos Biome	Eastern Fynbos-Renosterveld Bioregion	Well protected
Groot Thicket	201.183	AT 3	Least threatened	Albany Thicket Biome	Albany Thicket	Moderately protected
Matjiesfontein Quartzite Fynbos	146.043	FFq 3	Least threatened	Fynbos Biome	Western Fynbos-Renosterveld Bioregion	Poorly protected
Suurberg Shale Fynbos	0.3917	FFh 10	Least threatened	Fynbos Biome	Eastern Fynbos-Renosterveld Bioregion	Well protected
Swartland Shale Renosterveld	0.6352	FRs 9	Critically endangered	Fynbos Biome	West Coast Renosterveld Bioregion	Hardly protected
Suurberg Shale Fynbos	0.0972	FFh 10	Least threatened	Fynbos Biome	Eastern Fynbos-Renosterveld Bioregion	Well protected
Suurberg Shale Fynbos	0.0938	FFh 10	Least threatened	Fynbos Biome	Eastern Fynbos-Renosterveld Bioregion	Well protected
Suurberg Shale Fynbos	0.1184	FFh 10	Least threatened	Fynbos Biome	Eastern Fynbos-Renosterveld Bioregion	Well protected
Groot Thicket	174.11	AT 3	Least threatened	Albany Thicket Biome	Albany Thicket	Moderately protected
Suurberg Shale Fynbos	0.1504	FFh 10	Least threatened	Fynbos Biome	Eastern Fynbos-Renosterveld Bioregion	Well protected
Suurberg Shale Fynbos	0.1289	FFh 10	Least threatened	Fynbos Biome	Eastern Fynbos-Renosterveld Bioregion	Well protected
Suurberg Shale Fynbos	1.2744	FFh 10	Least threatened	Fynbos Biome	Eastern Fynbos-Renosterveld Bioregion	Well protected
Grootrivier Quartzite Fynbos	0.1324	FFq 5	Least threatened	Fynbos Biome	Eastern Fynbos-Renosterveld Bioregion	Not protected
Prince Albert Succulent Karoo	68.2119	SKv 13	Least threatened	Succulent Karoo Biome	Rainshadow Valley Karoo Bioregion	Poorly protected
Suurberg Shale Fynbos	1.2847	FFh 10	Least threatened	Fynbos Biome	Eastern Fynbos-Renosterveld Bioregion	Well protected
Tanqua Karoo	4.8874	SKv 5	Least threatened	Succulent Karoo Biome	Rainshadow Valley Karoo Bioregion	Poorly protected
Suurberg Shale Fynbos	3.2241	FFh 10	Least threatened	Fynbos Biome	Eastern Fynbos-Renosterveld Bioregion	Well protected
Groot Thicket	13.4123	AT 3	Least threatened	Albany Thicket Biome	Albany Thicket	Moderately protected
Matjiesfontein Shale Renosterveld	0.252	FRs 6	Least threatened	Fynbos Biome	Western Fynbos-Renosterveld Bioregion	Poorly protected
Steytlerville Karoo	0.1168	SKv 14	Least threatened	Succulent Karoo Biome	Rainshadow Valley Karoo Bioregion	Not protected
Swartland Shale Renosterveld	0.2089	FRs 9	Critically endangered	Fynbos Biome	West Coast Renosterveld Bioregion	Hardly protected
Suurberg Shale Fynbos	2.4714	FFh 10	Least threatened	Fynbos Biome	Eastern Fynbos-Renosterveld Bioregion	Well protected
Suurberg Shale Fynbos	0.7575	FFh 10	Least threatened	Fynbos Biome	Eastern Fynbos-Renosterveld Bioregion	Well protected
Albany Broken Veld	0.7035	NKl 4	Least threatened	Nama-Karoo Biome	Lower Karoo Bioregion	Hardly protected
Suurberg Shale Fynbos	0.2398	FFh 10	Least threatened	Fynbos Biome	Eastern Fynbos-Renosterveld Bioregion	Well protected
Suurberg Quartzite Fynbos	7.5387	FFq 6	Least threatened	Fynbos Biome	Eastern Fynbos-Renosterveld Bioregion	Moderately protected
Suurberg Shale Fynbos	1.2292	FFh 10	Least threatened	Fynbos Biome	Eastern Fynbos-Renosterveld Bioregion	Well protected
Albany Broken Veld	104.369	NKl 4	Least threatened	Nama-Karoo Biome	Lower Karoo Bioregion	Hardly protected
Steytlerville Karoo	0.1015	SKv 14	Least threatened	Succulent Karoo Biome	Rainshadow Valley Karoo Bioregion	Not protected
Lower Karoo Gwarrieveld	213.094	NKl 3	Least threatened	Nama-Karoo Biome	Lower Karoo Bioregion	Not protected
Suurberg Shale Fynbos	0.4596	FFh 10	Least threatened	Fynbos Biome	Eastern Fynbos-Renosterveld Bioregion	Well protected
Suurberg Shale Fynbos	0.0703	FFh 10	Least threatened	Fynbos Biome	Eastern Fynbos-Renosterveld Bioregion	Well protected
Grootrivier Quartzite Fynbos	4.5623	FFq 5	Least threatened	Fynbos Biome	Eastern Fynbos-Renosterveld Bioregion	Not protected
Suurberg Shale Fynbos	0.231	FFh 10	Least threatened	Fynbos Biome	Eastern Fynbos-Renosterveld Bioregion	Well protected
Suurberg Quartzite Fynbos	0.6753	FFq 6	Least threatened	Fynbos Biome	Eastern Fynbos-Renosterveld Bioregion	Moderately protected
Albany Broken Veld	0.1399	NKl 4	Least threatened	Nama-Karoo Biome	Lower Karoo Bioregion	Hardly protected
Swartland Shale Renosterveld	0.2361	FRs 9	Critically endangered	Fynbos Biome	West Coast Renosterveld Bioregion	Hardly protected
Suurberg Shale Fynbos	0.2333	FFh 10	Least threatened	Fynbos Biome	Eastern Fynbos-Renosterveld Bioregion	Well protected
Tanqua Karoo	1.0252	SKv 5	Least threatened	Succulent Karoo Biome	Rainshadow Valley Karoo Bioregion	Poorly protected
Suurberg Shale Fynbos	0.6135	FFh 10	Least threatened	Fynbos Biome	Eastern Fynbos-Renosterveld Bioregion	Well protected
Prince Albert Succulent Karoo	13.0246	SKv 13	Least threatened	Succulent Karoo Biome	Rainshadow Valley Karoo Bioregion	Poorly protected
Suurberg Shale Fynbos	0.1743	FFh 10	Least threatened	Fynbos Biome	Eastern Fynbos-Renosterveld Bioregion	Well protected
Steytlerville Karoo	488.742	SKv 14	Least threatened	Succulent Karoo Biome	Rainshadow Valley Karoo Bioregion	Not protected
Matjiesfontein Quartzite Fynbos	24.2862	FFq 3	Least threatened	Fynbos Biome	Western Fynbos-Renosterveld Bioregion	Poorly protected
Tanqua Karoo	2.9983	SKv 5	Least threatened	Succulent Karoo Biome	Rainshadow Valley Karoo Bioregion	Poorly protected
Suurberg Shale Fynbos	1.056	FFh 10	Least threatened	Fynbos Biome	Eastern Fynbos-Renosterveld Bioregion	Well protected
Albany Broken Veld	0.1452	NKl 4	Least threatened	Nama-Karoo Biome	Lower Karoo Bioregion	Hardly protected
Kowie Thicket	116.729	AT 8	Least threatened	Albany Thicket Biome	Albany Thicket	Poorly protected
Suurberg Shale Fynbos	0.1937	FFh 10	Least threatened	Fynbos Biome	Eastern Fynbos-Renosterveld Bioregion	Well protected
Suurberg Shale Fynbos	0.0501	FFh 10	Least threatened	Fynbos Biome	Eastern Fynbos-Renosterveld Bioregion	Well protected
Steytlerville Karoo	3.6225	SKv 14	Least threatened	Succulent Karoo Biome	Rainshadow Valley Karoo Bioregion	Not protected
Matjiesfontein Shale Renosterveld	0.1922	FRs 6	Least threatened	Fynbos Biome	Western Fynbos-Renosterveld Bioregion	Poorly protected
Suurberg Shale Fynbos	0.1128	FFh 10	Least threatened	Fynbos Biome	Eastern Fynbos-Renosterveld Bioregion	Well protected
Albany Broken Veld	0.1979	NKl 4	Least threatened	Nama-Karoo Biome	Lower Karoo Bioregion	Hardly protected
Suurberg Shale Fynbos	0.3611	FFh 10	Least threatened	Fynbos Biome	Eastern Fynbos-Renosterveld Bioregion	Well protected
Swartland Alluvium Fynbos	46.7948	FFa 3	Critically endangered	Fynbos Biome	Southwest Fynbos Bioregion	Poorly protected
Suurberg Shale Fynbos	1.0629	FFh 10	Least threatened	Fynbos Biome	Eastern Fynbos-Renosterveld Bioregion	Well protected
Suurberg Shale Fynbos	3.4924	FFh 10	Least threatened	Fynbos Biome	Eastern Fynbos-Renosterveld Bioregion	Well protected
Suurberg Shale Fynbos	0.055	FFh 10	Least threatened	Fynbos Biome	Eastern Fynbos-Renosterveld Bioregion	Well protected
Grootrivier Quartzite Fynbos	4.8898	FFq 5	Least threatened	Fynbos Biome	Eastern Fynbos-Renosterveld Bioregion	Not protected
Suurberg Shale Fynbos	0.3607	FFh 10	Least threatened	Fynbos Biome	Eastern Fynbos-Renosterveld Bioregion	Well protected
Kowie Thicket	42.1456	AT 8	Least threatened	Albany Thicket Biome	Albany Thicket	Poorly protected
Albany Broken Veld	0.4477	NKl 4	Least threatened	Nama-Karoo Biome	Lower Karoo Bioregion	Hardly protected
Groot Thicket	0.5103	AT 3	Least threatened	Albany Thicket Biome	Albany Thicket	Moderately protected
Albany Broken Veld	0.0932	NKl 4	Least threatened	Nama-Karoo Biome	Lower Karoo Bioregion	Hardly protected
Suurberg Shale Fynbos	0.0763	FFh 10	Least threatened	Fynbos Biome	Eastern Fynbos-Renosterveld Bioregion	Well protected
Suurberg Quartzite Fynbos	1.2574	FFq 6	Least threatened	Fynbos Biome	Eastern Fynbos-Renosterveld Bioregion	Moderately protected
Suurberg Shale Fynbos	0.1525	FFh 10	Least threatened	Fynbos Biome	Eastern Fynbos-Renosterveld Bioregion	Well protected
Suurberg Shale Fynbos	0.4257	FFh 10	Least threatened	Fynbos Biome	Eastern Fynbos-Renosterveld Bioregion	Well protected
Steytlerville Karoo	4.9914	SKv 14	Least threatened	Succulent Karoo Biome	Rainshadow Valley Karoo Bioregion	Not protected
Suurberg Quartzite Fynbos	70.393	FFq 6	Least threatened	Fynbos Biome	Eastern Fynbos-Renosterveld Bioregion	Moderately protected
Suurberg Shale Fynbos	33.4942	FFh 10	Least threatened	Fynbos Biome	Eastern Fynbos-Renosterveld Bioregion	Well protected
Swartruggens Quartzite Karoo	0.9392	SKv 2	Least threatened	Succulent Karoo Biome	Rainshadow Valley Karoo Bioregion	Poorly protected
Grootrivier Quartzite Fynbos	0.1827	FFq 5	Least threatened	Fynbos Biome	Eastern Fynbos-Renosterveld Bioregion	Not protected
Groot Thicket	214.198	AT 3	Least threatened	Albany Thicket Biome	Albany Thicket	Moderately protected
Gamka Thicket	185.011	AT 2	Least threatened	Albany Thicket Biome	Albany Thicket	Poorly protected
Steytlerville Karoo	10.7753	SKv 14	Least threatened	Succulent Karoo Biome	Rainshadow Valley Karoo Bioregion	Not protected
Suurberg Shale Fynbos	0.051	FFh 10	Least threatened	Fynbos Biome	Eastern Fynbos-Renosterveld Bioregion	Well protected
Groot Thicket	579.15	AT 3	Least threatened	Albany Thicket Biome	Albany Thicket	Moderately protected
Suurberg Quartzite Fynbos	57.3393	FFq 6	Least threatened	Fynbos Biome	Eastern Fynbos-Renosterveld Bioregion	Moderately protected
Matjiesfontein Shale Renosterveld	0.1731	FRs 6	Least threatened	Fynbos Biome	Western Fynbos-Renosterveld Bioregion	Poorly protected
Matjiesfontein Shale Renosterveld	0.6663	FRs 6	Least threatened	Fynbos Biome	Western Fynbos-Renosterveld Bioregion	Poorly protected
Matjiesfontein Quartzite Fynbos	64.6174	FFq 3	Least threatened	Fynbos Biome	Western Fynbos-Renosterveld Bioregion	Poorly protected
Willowmore Gwarrieveld	233.273	SKv 12	Least threatened	Succulent Karoo Biome	Rainshadow Valley Karoo Bioregion	Hardly protected
Swartland Shale Renosterveld	0.3114	FRs 9	Critically endangered	Fynbos Biome	West Coast Renosterveld Bioregion	Hardly protected
Matjiesfontein Shale Renosterveld	0.5697	FRs 6	Least threatened	Fynbos Biome	Western Fynbos-Renosterveld Bioregion	Poorly protected
Prince Albert Succulent Karoo	28.5967	SKv 13	Least threatened	Succulent Karoo Biome	Rainshadow Valley Karoo Bioregion	Poorly protected
Albany Broken Veld	0.0953	NKl 4	Least threatened	Nama-Karoo Biome	Lower Karoo Bioregion	Hardly protected
Matjiesfontein Shale Renosterveld	9.5786	FRs 6	Least threatened	Fynbos Biome	Western Fynbos-Renosterveld Bioregion	Poorly protected
Bhisho Thornveld	293.54	SVs 7	Least threatened	Savanna Biome	Sub-Escarpment Savanna Bioregion	Hardly protected
Matjiesfontein Shale Renosterveld	0.1212	FRs 6	Least threatened	Fynbos Biome	Western Fynbos-Renosterveld Bioregion	Poorly protected
Suurberg Shale Fynbos	0.1072	FFh 10	Least threatened	Fynbos Biome	Eastern Fynbos-Renosterveld Bioregion	Well protected
Southern Mistbelt Forest	1.1146	FOz 3	Least threatened	Forests	Zonal & Intrazonal Forests	Poorly protected
Suurberg Shale Fynbos	0.2161	FFh 10	Least threatened	Fynbos Biome	Eastern Fynbos-Renosterveld Bioregion	Well protected
Kowie Thicket	13.8579	AT 8	Least threatened	Albany Thicket Biome	Albany Thicket	Poorly protected
Suurberg Shale Fynbos	0.2447	FFh 10	Least threatened	Fynbos Biome	Eastern Fynbos-Renosterveld Bioregion	Well protected
Suurberg Shale Fynbos	0.1178	FFh 10	Least threatened	Fynbos Biome	Eastern Fynbos-Renosterveld Bioregion	Well protected
Suurberg Shale Fynbos	0.0504	FFh 10	Least threatened	Fynbos Biome	Eastern Fynbos-Renosterveld Bioregion	Well protected
Steytlerville Karoo	35.037	SKv 14	Least threatened	Succulent Karoo Biome	Rainshadow Valley Karoo Bioregion	Not protected
Southern Mistbelt Forest	0.1337	FOz 3	Least threatened	Forests	Zonal & Intrazonal Forests	Poorly protected
Matjiesfontein Shale Renosterveld	10.4654	FRs 6	Least threatened	Fynbos Biome	Western Fynbos-Renosterveld Bioregion	Poorly protected
Suurberg Quartzite Fynbos	0.061	FFq 6	Least threatened	Fynbos Biome	Eastern Fynbos-Renosterveld Bioregion	Moderately protected
Kowie Thicket	10.9553	AT 8	Least threatened	Albany Thicket Biome	Albany Thicket	Poorly protected
Suurberg Shale Fynbos	0.0649	FFh 10	Least threatened	Fynbos Biome	Eastern Fynbos-Renosterveld Bioregion	Well protected
Breede Shale Renosterveld	149.843	FRs 8	Vulnerable	Fynbos Biome	East Coast Renosterveld Bioregion	Poorly protected
Suurberg Shale Fynbos	0.9058	FFh 10	Least threatened	Fynbos Biome	Eastern Fynbos-Renosterveld Bioregion	Well protected
Swartland Shale Renosterveld	1.2082	FRs 9	Critically endangered	Fynbos Biome	West Coast Renosterveld Bioregion	Hardly protected
Suurberg Shale Fynbos	0.0554	FFh 10	Least threatened	Fynbos Biome	Eastern Fynbos-Renosterveld Bioregion	Well protected
Albany Broken Veld	12.5747	NKl 4	Least threatened	Nama-Karoo Biome	Lower Karoo Bioregion	Hardly protected
Eastern Lower Karoo	81.4837	NKl 2	Least threatened	Nama-Karoo Biome	Lower Karoo Bioregion	Hardly protected
Matjiesfontein Quartzite Fynbos	4.4964	FFq 3	Least threatened	Fynbos Biome	Western Fynbos-Renosterveld Bioregion	Poorly protected
Grootrivier Quartzite Fynbos	3.1834	FFq 5	Least threatened	Fynbos Biome	Eastern Fynbos-Renosterveld Bioregion	Not protected
Matjiesfontein Shale Renosterveld	0.6153	FRs 6	Least threatened	Fynbos Biome	Western Fynbos-Renosterveld Bioregion	Poorly protected
Swartland Shale Renosterveld	0.9836	FRs 9	Critically endangered	Fynbos Biome	West Coast Renosterveld Bioregion	Hardly protected
Swartland Shale Renosterveld	0.1758	FRs 9	Critically endangered	Fynbos Biome	West Coast Renosterveld Bioregion	Hardly protected
Sundays Noorsveld	0.7856	AT 5	Least threatened	Albany Thicket Biome	Albany Thicket	Moderately protected
Suurberg Shale Fynbos	0.6478	FFh 10	Least threatened	Fynbos Biome	Eastern Fynbos-Renosterveld Bioregion	Well protected
Suurberg Shale Fynbos	53.6492	FFh 10	Least threatened	Fynbos Biome	Eastern Fynbos-Renosterveld Bioregion	Well protected
Southern Mistbelt Forest	1.3535	FOz 3	Least threatened	Forests	Zonal & Intrazonal Forests	Poorly protected
Suurberg Shale Fynbos	0.1047	FFh 10	Least threatened	Fynbos Biome	Eastern Fynbos-Renosterveld Bioregion	Well protected
Matjiesfontein Quartzite Fynbos	64.8477	FFq 3	Least threatened	Fynbos Biome	Western Fynbos-Renosterveld Bioregion	Poorly protected
Suurberg Shale Fynbos	0.2312	FFh 10	Least threatened	Fynbos Biome	Eastern Fynbos-Renosterveld Bioregion	Well protected
Groot Thicket	1.225	AT 3	Least threatened	Albany Thicket Biome	Albany Thicket	Moderately protected
Suurberg Shale Fynbos	0.652	FFh 10	Least threatened	Fynbos Biome	Eastern Fynbos-Renosterveld Bioregion	Well protected
Suurberg Shale Fynbos	0.1072	FFh 10	Least threatened	Fynbos Biome	Eastern Fynbos-Renosterveld Bioregion	Well protected
Suurberg Quartzite Fynbos	221.821	FFq 6	Least threatened	Fynbos Biome	Eastern Fynbos-Renosterveld Bioregion	Moderately protected
Kowie Thicket	1043.56	AT 8	Least threatened	Albany Thicket Biome	Albany Thicket	Poorly protected
Swartland Shale Renosterveld	0.4782	FRs 9	Critically endangered	Fynbos Biome	West Coast Renosterveld Bioregion	Hardly protected
Suurberg Shale Fynbos	0.1399	FFh 10	Least threatened	Fynbos Biome	Eastern Fynbos-Renosterveld Bioregion	Well protected
Groot Thicket	0.5274	AT 3	Least threatened	Albany Thicket Biome	Albany Thicket	Moderately protected
Groot Thicket	0.6488	AT 3	Least threatened	Albany Thicket Biome	Albany Thicket	Moderately protected
Sundays Noorsveld	0.2268	AT 5	Least threatened	Albany Thicket Biome	Albany Thicket	Moderately protected
Matjiesfontein Shale Renosterveld	0.2024	FRs 6	Least threatened	Fynbos Biome	Western Fynbos-Renosterveld Bioregion	Poorly protected
Suurberg Shale Fynbos	1.0252	FFh 10	Least threatened	Fynbos Biome	Eastern Fynbos-Renosterveld Bioregion	Well protected
Suurberg Shale Fynbos	1.0697	FFh 10	Least threatened	Fynbos Biome	Eastern Fynbos-Renosterveld Bioregion	Well protected
Grootrivier Quartzite Fynbos	36.5349	FFq 5	Least threatened	Fynbos Biome	Eastern Fynbos-Renosterveld Bioregion	Not protected
Suurberg Shale Fynbos	0.3276	FFh 10	Least threatened	Fynbos Biome	Eastern Fynbos-Renosterveld Bioregion	Well protected
Suurberg Shale Fynbos	0.1236	FFh 10	Least threatened	Fynbos Biome	Eastern Fynbos-Renosterveld Bioregion	Well protected
Ceres Shale Renosterveld	275.221	FRs 4	Vulnerable	Fynbos Biome	Western Fynbos-Renosterveld Bioregion	Hardly protected
Swartland Shale Renosterveld	1.4423	FRs 9	Critically endangered	Fynbos Biome	West Coast Renosterveld Bioregion	Hardly protected
Suurberg Shale Fynbos	0.2496	FFh 10	Least threatened	Fynbos Biome	Eastern Fynbos-Renosterveld Bioregion	Well protected
Suurberg Shale Fynbos	0.7544	FFh 10	Least threatened	Fynbos Biome	Eastern Fynbos-Renosterveld Bioregion	Well protected
Willowmore Gwarrieveld	450.785	SKv 12	Least threatened	Succulent Karoo Biome	Rainshadow Valley Karoo Bioregion	Hardly protected
Southern Mistbelt Forest	0.4759	FOz 3	Least threatened	Forests	Zonal & Intrazonal Forests	Poorly protected
Suurberg Shale Fynbos	0.37	FFh 10	Least threatened	Fynbos Biome	Eastern Fynbos-Renosterveld Bioregion	Well protected
Groot Thicket	0.1139	AT 3	Least threatened	Albany Thicket Biome	Albany Thicket	Moderately protected
Suurberg Shale Fynbos	240.908	FFh 10	Least threatened	Fynbos Biome	Eastern Fynbos-Renosterveld Bioregion	Well protected
Swartberg Shale Renosterveld	257.684	FRs 15	Least threatened	Fynbos Biome	Western Fynbos-Renosterveld Bioregion	Poorly protected
Suurberg Quartzite Fynbos	0.3448	FFq 6	Least threatened	Fynbos Biome	Eastern Fynbos-Renosterveld Bioregion	Moderately protected
Matjiesfontein Quartzite Fynbos	0.1095	FFq 3	Least threatened	Fynbos Biome	Western Fynbos-Renosterveld Bioregion	Poorly protected
Suurberg Shale Fynbos	0.1443	FFh 10	Least threatened	Fynbos Biome	Eastern Fynbos-Renosterveld Bioregion	Well protected
Southern Mistbelt Forest	0.3517	FOz 3	Least threatened	Forests	Zonal & Intrazonal Forests	Poorly protected
Suurberg Shale Fynbos	0.0591	FFh 10	Least threatened	Fynbos Biome	Eastern Fynbos-Renosterveld Bioregion	Well protected
Suurberg Shale Fynbos	0.0647	FFh 10	Least threatened	Fynbos Biome	Eastern Fynbos-Renosterveld Bioregion	Well protected
Suurberg Shale Fynbos	0.0577	FFh 10	Least threatened	Fynbos Biome	Eastern Fynbos-Renosterveld Bioregion	Well protected
Groot Thicket	1.5754	AT 3	Least threatened	Albany Thicket Biome	Albany Thicket	Moderately protected
Matjiesfontein Quartzite Fynbos	139.501	FFq 3	Least threatened	Fynbos Biome	Western Fynbos-Renosterveld Bioregion	Poorly protected
Matjiesfontein Quartzite Fynbos	0.8561	FFq 3	Least threatened	Fynbos Biome	Western Fynbos-Renosterveld Bioregion	Poorly protected
Matjiesfontein Quartzite Fynbos	1.8983	FFq 3	Least threatened	Fynbos Biome	Western Fynbos-Renosterveld Bioregion	Poorly protected
Groot Thicket	0.1328	AT 3	Least threatened	Albany Thicket Biome	Albany Thicket	Moderately protected
Groot Thicket	5.4223	AT 3	Least threatened	Albany Thicket Biome	Albany Thicket	Moderately protected
Prince Albert Succulent Karoo	156.338	SKv 13	Least threatened	Succulent Karoo Biome	Rainshadow Valley Karoo Bioregion	Poorly protected
Suurberg Shale Fynbos	2.1851	FFh 10	Least threatened	Fynbos Biome	Eastern Fynbos-Renosterveld Bioregion	Well protected
Grootrivier Quartzite Fynbos	5.5702	FFq 5	Least threatened	Fynbos Biome	Eastern Fynbos-Renosterveld Bioregion	Not protected
Matjiesfontein Quartzite Fynbos	0.3557	FFq 3	Least threatened	Fynbos Biome	Western Fynbos-Renosterveld Bioregion	Poorly protected
Suurberg Shale Fynbos	1.9375	FFh 10	Least threatened	Fynbos Biome	Eastern Fynbos-Renosterveld Bioregion	Well protected
Suurberg Quartzite Fynbos	9.3016	FFq 6	Least threatened	Fynbos Biome	Eastern Fynbos-Renosterveld Bioregion	Moderately protected
Albany Broken Veld	10.7915	NKl 4	Least threatened	Nama-Karoo Biome	Lower Karoo Bioregion	Hardly protected
Suurberg Shale Fynbos	0.3133	FFh 10	Least threatened	Fynbos Biome	Eastern Fynbos-Renosterveld Bioregion	Well protected
Matjiesfontein Quartzite Fynbos	1.8134	FFq 3	Least threatened	Fynbos Biome	Western Fynbos-Renosterveld Bioregion	Poorly protected
Suurberg Shale Fynbos	0.4387	FFh 10	Least threatened	Fynbos Biome	Eastern Fynbos-Renosterveld Bioregion	Well protected
Albany Broken Veld	0.6803	NKl 4	Least threatened	Nama-Karoo Biome	Lower Karoo Bioregion	Hardly protected
Matjiesfontein Quartzite Fynbos	1.5214	FFq 3	Least threatened	Fynbos Biome	Western Fynbos-Renosterveld Bioregion	Poorly protected
Albany Broken Veld	0.2888	NKl 4	Least threatened	Nama-Karoo Biome	Lower Karoo Bioregion	Hardly protected
Southern Mistbelt Forest	0.3913	FOz 3	Least threatened	Forests	Zonal & Intrazonal Forests	Poorly protected
Matjiesfontein Quartzite Fynbos	0.1163	FFq 3	Least threatened	Fynbos Biome	Western Fynbos-Renosterveld Bioregion	Poorly protected
Matjiesfontein Quartzite Fynbos	0.5492	FFq 3	Least threatened	Fynbos Biome	Western Fynbos-Renosterveld Bioregion	Poorly protected
Southern Mistbelt Forest	0.2924	FOz 3	Least threatened	Forests	Zonal & Intrazonal Forests	Poorly protected
Albany Broken Veld	0.2987	NKl 4	Least threatened	Nama-Karoo Biome	Lower Karoo Bioregion	Hardly protected
Matjiesfontein Quartzite Fynbos	4.5032	FFq 3	Least threatened	Fynbos Biome	Western Fynbos-Renosterveld Bioregion	Poorly protected
Suurberg Quartzite Fynbos	72.9501	FFq 6	Least threatened	Fynbos Biome	Eastern Fynbos-Renosterveld Bioregion	Moderately protected
Bhisho Thornveld	83.6587	SVs 7	Least threatened	Savanna Biome	Sub-Escarpment Savanna Bioregion	Hardly protected
Matjiesfontein Quartzite Fynbos	69.9303	FFq 3	Least threatened	Fynbos Biome	Western Fynbos-Renosterveld Bioregion	Poorly protected
Matjiesfontein Quartzite Fynbos	4.1515	FFq 3	Least threatened	Fynbos Biome	Western Fynbos-Renosterveld Bioregion	Poorly protected
Bhisho Thornveld	0.7168	SVs 7	Least threatened	Savanna Biome	Sub-Escarpment Savanna Bioregion	Hardly protected
Matjiesfontein Quartzite Fynbos	1.0544	FFq 3	Least threatened	Fynbos Biome	Western Fynbos-Renosterveld Bioregion	Poorly protected
Matjiesfontein Quartzite Fynbos	1.1387	FFq 3	Least threatened	Fynbos Biome	Western Fynbos-Renosterveld Bioregion	Poorly protected
Albany Broken Veld	0.0909	NKl 4	Least threatened	Nama-Karoo Biome	Lower Karoo Bioregion	Hardly protected
Suurberg Shale Fynbos	0.1314	FFh 10	Least threatened	Fynbos Biome	Eastern Fynbos-Renosterveld Bioregion	Well protected
Matjiesfontein Quartzite Fynbos	0.7207	FFq 3	Least threatened	Fynbos Biome	Western Fynbos-Renosterveld Bioregion	Poorly protected
Groot Thicket	1.1088	AT 3	Least threatened	Albany Thicket Biome	Albany Thicket	Moderately protected
Albany Broken Veld	0.3139	NKl 4	Least threatened	Nama-Karoo Biome	Lower Karoo Bioregion	Hardly protected
Suurberg Shale Fynbos	0.1251	FFh 10	Least threatened	Fynbos Biome	Eastern Fynbos-Renosterveld Bioregion	Well protected
Swartland Shale Renosterveld	0.7281	FRs 9	Critically endangered	Fynbos Biome	West Coast Renosterveld Bioregion	Hardly protected
Suurberg Shale Fynbos	0.0685	FFh 10	Least threatened	Fynbos Biome	Eastern Fynbos-Renosterveld Bioregion	Well protected
Prince Albert Succulent Karoo	1.2506	SKv 13	Least threatened	Succulent Karoo Biome	Rainshadow Valley Karoo Bioregion	Poorly protected
Suurberg Shale Fynbos	0.3117	FFh 10	Least threatened	Fynbos Biome	Eastern Fynbos-Renosterveld Bioregion	Well protected
Matjiesfontein Quartzite Fynbos	0.7477	FFq 3	Least threatened	Fynbos Biome	Western Fynbos-Renosterveld Bioregion	Poorly protected
Prince Albert Succulent Karoo	1.5798	SKv 13	Least threatened	Succulent Karoo Biome	Rainshadow Valley Karoo Bioregion	Poorly protected
Suurberg Quartzite Fynbos	1.0893	FFq 6	Least threatened	Fynbos Biome	Eastern Fynbos-Renosterveld Bioregion	Moderately protected
Western Little Karoo	3814.52	SKv 8	Least threatened	Succulent Karoo Biome	Rainshadow Valley Karoo Bioregion	Poorly protected
Matjiesfontein Quartzite Fynbos	18.8324	FFq 3	Least threatened	Fynbos Biome	Western Fynbos-Renosterveld Bioregion	Poorly protected
Prince Albert Succulent Karoo	292.948	SKv 13	Least threatened	Succulent Karoo Biome	Rainshadow Valley Karoo Bioregion	Poorly protected
Matjiesfontein Quartzite Fynbos	13.5748	FFq 3	Least threatened	Fynbos Biome	Western Fynbos-Renosterveld Bioregion	Poorly protected
Suurberg Shale Fynbos	0.1417	FFh 10	Least threatened	Fynbos Biome	Eastern Fynbos-Renosterveld Bioregion	Well protected
Prince Albert Succulent Karoo	0.1605	SKv 13	Least threatened	Succulent Karoo Biome	Rainshadow Valley Karoo Bioregion	Poorly protected
Suurberg Shale Fynbos	0.7743	FFh 10	Least threatened	Fynbos Biome	Eastern Fynbos-Renosterveld Bioregion	Well protected
Gamka Thicket	98.3891	AT 2	Least threatened	Albany Thicket Biome	Albany Thicket	Poorly protected
Matjiesfontein Shale Renosterveld	3.6017	FRs 6	Least threatened	Fynbos Biome	Western Fynbos-Renosterveld Bioregion	Poorly protected
Suurberg Shale Fynbos	0.0614	FFh 10	Least threatened	Fynbos Biome	Eastern Fynbos-Renosterveld Bioregion	Well protected
Willowmore Gwarrieveld	0.755	SKv 12	Least threatened	Succulent Karoo Biome	Rainshadow Valley Karoo Bioregion	Hardly protected
Matjiesfontein Quartzite Fynbos	5.706	FFq 3	Least threatened	Fynbos Biome	Western Fynbos-Renosterveld Bioregion	Poorly protected
Matjiesfontein Shale Fynbos	29.2725	FFh 2	Least threatened	Fynbos Biome	Western Fynbos-Renosterveld Bioregion	Moderately protected
Matjiesfontein Shale Renosterveld	6.9574	FRs 6	Least threatened	Fynbos Biome	Western Fynbos-Renosterveld Bioregion	Poorly protected
Suurberg Shale Fynbos	0.144	FFh 10	Least threatened	Fynbos Biome	Eastern Fynbos-Renosterveld Bioregion	Well protected
Uniondale Shale Renosterveld	541.342	FRs 16	Least threatened	Fynbos Biome	Eastern Fynbos-Renosterveld Bioregion	Hardly protected
Matjiesfontein Quartzite Fynbos	0.2521	FFq 3	Least threatened	Fynbos Biome	Western Fynbos-Renosterveld Bioregion	Poorly protected
Suurberg Quartzite Fynbos	0.0783	FFq 6	Least threatened	Fynbos Biome	Eastern Fynbos-Renosterveld Bioregion	Moderately protected
Albany Alluvial Vegetation	0.3601	AZa 6	Endangered	Azonal Vegetation	Alluvial Vegetation	Poorly protected
Suurberg Shale Fynbos	0.9609	FFh 10	Least threatened	Fynbos Biome	Eastern Fynbos-Renosterveld Bioregion	Well protected
Groot Thicket	4.075	AT 3	Least threatened	Albany Thicket Biome	Albany Thicket	Moderately protected
Suurberg Shale Fynbos	0.9505	FFh 10	Least threatened	Fynbos Biome	Eastern Fynbos-Renosterveld Bioregion	Well protected
Suurberg Shale Fynbos	0.5893	FFh 10	Least threatened	Fynbos Biome	Eastern Fynbos-Renosterveld Bioregion	Well protected
Suurberg Quartzite Fynbos	63.8128	FFq 6	Least threatened	Fynbos Biome	Eastern Fynbos-Renosterveld Bioregion	Moderately protected
Suurberg Quartzite Fynbos	0.3327	FFq 6	Least threatened	Fynbos Biome	Eastern Fynbos-Renosterveld Bioregion	Moderately protected
North Hex Sandstone Fynbos	4.7545	FFs 7	Least threatened	Fynbos Biome	Northwest Fynbos Bioregion	Well protected
Suurberg Quartzite Fynbos	0.1519	FFq 6	Least threatened	Fynbos Biome	Eastern Fynbos-Renosterveld Bioregion	Moderately protected
Suurberg Shale Fynbos	10.9331	FFh 10	Least threatened	Fynbos Biome	Eastern Fynbos-Renosterveld Bioregion	Well protected
Grootrivier Quartzite Fynbos	8.2258	FFq 5	Least threatened	Fynbos Biome	Eastern Fynbos-Renosterveld Bioregion	Not protected
Prince Albert Succulent Karoo	3.49	SKv 13	Least threatened	Succulent Karoo Biome	Rainshadow Valley Karoo Bioregion	Poorly protected
Prince Albert Succulent Karoo	0.1024	SKv 13	Least threatened	Succulent Karoo Biome	Rainshadow Valley Karoo Bioregion	Poorly protected
Matjiesfontein Shale Renosterveld	74.4232	FRs 6	Least threatened	Fynbos Biome	Western Fynbos-Renosterveld Bioregion	Poorly protected
Matjiesfontein Shale Renosterveld	22.6134	FRs 6	Least threatened	Fynbos Biome	Western Fynbos-Renosterveld Bioregion	Poorly protected
Suurberg Shale Fynbos	24.263	FFh 10	Least threatened	Fynbos Biome	Eastern Fynbos-Renosterveld Bioregion	Well protected
Prince Albert Succulent Karoo	1.8898	SKv 13	Least threatened	Succulent Karoo Biome	Rainshadow Valley Karoo Bioregion	Poorly protected
Matjiesfontein Quartzite Fynbos	5.4845	FFq 3	Least threatened	Fynbos Biome	Western Fynbos-Renosterveld Bioregion	Poorly protected
Matjiesfontein Quartzite Fynbos	0.0578	FFq 3	Least threatened	Fynbos Biome	Western Fynbos-Renosterveld Bioregion	Poorly protected
Suurberg Shale Fynbos	2.0724	FFh 10	Least threatened	Fynbos Biome	Eastern Fynbos-Renosterveld Bioregion	Well protected
Swartland Shale Renosterveld	0.7797	FRs 9	Critically endangered	Fynbos Biome	West Coast Renosterveld Bioregion	Hardly protected
North Hex Sandstone Fynbos	269.452	FFs 7	Least threatened	Fynbos Biome	Northwest Fynbos Bioregion	Well protected
Suurberg Quartzite Fynbos	0.2988	FFq 6	Least threatened	Fynbos Biome	Eastern Fynbos-Renosterveld Bioregion	Moderately protected
Matjiesfontein Quartzite Fynbos	1.7021	FFq 3	Least threatened	Fynbos Biome	Western Fynbos-Renosterveld Bioregion	Poorly protected
Suurberg Quartzite Fynbos	9.7212	FFq 6	Least threatened	Fynbos Biome	Eastern Fynbos-Renosterveld Bioregion	Moderately protected
Suurberg Quartzite Fynbos	0.5493	FFq 6	Least threatened	Fynbos Biome	Eastern Fynbos-Renosterveld Bioregion	Moderately protected
Suurberg Quartzite Fynbos	0.2629	FFq 6	Least threatened	Fynbos Biome	Eastern Fynbos-Renosterveld Bioregion	Moderately protected
Suurberg Quartzite Fynbos	0.0639	FFq 6	Least threatened	Fynbos Biome	Eastern Fynbos-Renosterveld Bioregion	Moderately protected
Suurberg Quartzite Fynbos	0.2424	FFq 6	Least threatened	Fynbos Biome	Eastern Fynbos-Renosterveld Bioregion	Moderately protected
Matjiesfontein Shale Renosterveld	0.5008	FRs 6	Least threatened	Fynbos Biome	Western Fynbos-Renosterveld Bioregion	Poorly protected
Matjiesfontein Quartzite Fynbos	1.4238	FFq 3	Least threatened	Fynbos Biome	Western Fynbos-Renosterveld Bioregion	Poorly protected
Albany Alluvial Vegetation	0.324	AZa 6	Endangered	Azonal Vegetation	Alluvial Vegetation	Poorly protected
Ceres Shale Renosterveld	34.8462	FRs 4	Vulnerable	Fynbos Biome	Western Fynbos-Renosterveld Bioregion	Hardly protected
Suurberg Shale Fynbos	0.0855	FFh 10	Least threatened	Fynbos Biome	Eastern Fynbos-Renosterveld Bioregion	Well protected
Suurberg Shale Fynbos	2.4259	FFh 10	Least threatened	Fynbos Biome	Eastern Fynbos-Renosterveld Bioregion	Well protected
Matjiesfontein Quartzite Fynbos	0.1946	FFq 3	Least threatened	Fynbos Biome	Western Fynbos-Renosterveld Bioregion	Poorly protected
Suurberg Shale Fynbos	5.2501	FFh 10	Least threatened	Fynbos Biome	Eastern Fynbos-Renosterveld Bioregion	Well protected
Kowie Thicket	49.049	AT 8	Least threatened	Albany Thicket Biome	Albany Thicket	Poorly protected
Matjiesfontein Quartzite Fynbos	0.7815	FFq 3	Least threatened	Fynbos Biome	Western Fynbos-Renosterveld Bioregion	Poorly protected
Suurberg Quartzite Fynbos	0.0973	FFq 6	Least threatened	Fynbos Biome	Eastern Fynbos-Renosterveld Bioregion	Moderately protected
Prince Albert Succulent Karoo	0.6686	SKv 13	Least threatened	Succulent Karoo Biome	Rainshadow Valley Karoo Bioregion	Poorly protected
Gamka Thicket	20.8409	AT 2	Least threatened	Albany Thicket Biome	Albany Thicket	Poorly protected
Swartland Alluvium Fynbos	0.1811	FFa 3	Critically endangered	Fynbos Biome	Southwest Fynbos Bioregion	Poorly protected
Southern Mistbelt Forest	0.1731	FOz 3	Least threatened	Forests	Zonal & Intrazonal Forests	Poorly protected
North Swartberg Sandstone Fynbos	673.261	FFs 23	Least threatened	Fynbos Biome	Western Fynbos-Renosterveld Bioregion	Well protected
Southern Mistbelt Forest	0.2592	FOz 3	Least threatened	Forests	Zonal & Intrazonal Forests	Poorly protected
Kowie Thicket	342.207	AT 8	Least threatened	Albany Thicket Biome	Albany Thicket	Poorly protected
Kowie Thicket	10.6147	AT 8	Least threatened	Albany Thicket Biome	Albany Thicket	Poorly protected
Southern Mistbelt Forest	0.5074	FOz 3	Least threatened	Forests	Zonal & Intrazonal Forests	Poorly protected
Matjiesfontein Shale Renosterveld	3.6854	FRs 6	Least threatened	Fynbos Biome	Western Fynbos-Renosterveld Bioregion	Poorly protected
Suurberg Quartzite Fynbos	0.1089	FFq 6	Least threatened	Fynbos Biome	Eastern Fynbos-Renosterveld Bioregion	Moderately protected
Southern Mistbelt Forest	0.1648	FOz 3	Least threatened	Forests	Zonal & Intrazonal Forests	Poorly protected
Suurberg Shale Fynbos	0.2554	FFh 10	Least threatened	Fynbos Biome	Eastern Fynbos-Renosterveld Bioregion	Well protected
Southern Mistbelt Forest	0.1644	FOz 3	Least threatened	Forests	Zonal & Intrazonal Forests	Poorly protected
Matjiesfontein Quartzite Fynbos	0.1222	FFq 3	Least threatened	Fynbos Biome	Western Fynbos-Renosterveld Bioregion	Poorly protected
Matjiesfontein Shale Renosterveld	1.6598	FRs 6	Least threatened	Fynbos Biome	Western Fynbos-Renosterveld Bioregion	Poorly protected
Albany Alluvial Vegetation	0.6812	AZa 6	Endangered	Azonal Vegetation	Alluvial Vegetation	Poorly protected
Matjiesfontein Quartzite Fynbos	45.6425	FFq 3	Least threatened	Fynbos Biome	Western Fynbos-Renosterveld Bioregion	Poorly protected
Matjiesfontein Quartzite Fynbos	0.2847	FFq 3	Least threatened	Fynbos Biome	Western Fynbos-Renosterveld Bioregion	Poorly protected
Suurberg Shale Fynbos	1.4744	FFh 10	Least threatened	Fynbos Biome	Eastern Fynbos-Renosterveld Bioregion	Well protected
Suurberg Quartzite Fynbos	0.6376	FFq 6	Least threatened	Fynbos Biome	Eastern Fynbos-Renosterveld Bioregion	Moderately protected
Southern Mistbelt Forest	0.2637	FOz 3	Least threatened	Forests	Zonal & Intrazonal Forests	Poorly protected
Matjiesfontein Quartzite Fynbos	6.1219	FFq 3	Least threatened	Fynbos Biome	Western Fynbos-Renosterveld Bioregion	Poorly protected
Suurberg Shale Fynbos	15.4548	FFh 10	Least threatened	Fynbos Biome	Eastern Fynbos-Renosterveld Bioregion	Well protected
Suurberg Quartzite Fynbos	2.0453	FFq 6	Least threatened	Fynbos Biome	Eastern Fynbos-Renosterveld Bioregion	Moderately protected
Grootrivier Quartzite Fynbos	3.9811	FFq 5	Least threatened	Fynbos Biome	Eastern Fynbos-Renosterveld Bioregion	Not protected
Matjiesfontein Quartzite Fynbos	0.1526	FFq 3	Least threatened	Fynbos Biome	Western Fynbos-Renosterveld Bioregion	Poorly protected
Central Inland Shale Band Vegetation	6.6309	FFb 3	Least threatened	Fynbos Biome	Western Fynbos-Renosterveld Bioregion	Well protected
Breede Alluvium Fynbos	9.5907	FFa 2	Endangered	Fynbos Biome	Southwest Fynbos Bioregion	Hardly protected
Matjiesfontein Quartzite Fynbos	0.149	FFq 3	Least threatened	Fynbos Biome	Western Fynbos-Renosterveld Bioregion	Poorly protected
Willowmore Gwarrieveld	888.453	SKv 12	Least threatened	Succulent Karoo Biome	Rainshadow Valley Karoo Bioregion	Hardly protected
Bhisho Thornveld	1.4963	SVs 7	Least threatened	Savanna Biome	Sub-Escarpment Savanna Bioregion	Hardly protected
Matjiesfontein Shale Renosterveld	0.0753	FRs 6	Least threatened	Fynbos Biome	Western Fynbos-Renosterveld Bioregion	Poorly protected
Suurberg Quartzite Fynbos	16.2482	FFq 6	Least threatened	Fynbos Biome	Eastern Fynbos-Renosterveld Bioregion	Moderately protected
Suurberg Quartzite Fynbos	1.0581	FFq 6	Least threatened	Fynbos Biome	Eastern Fynbos-Renosterveld Bioregion	Moderately protected
Matjiesfontein Quartzite Fynbos	0.3726	FFq 3	Least threatened	Fynbos Biome	Western Fynbos-Renosterveld Bioregion	Poorly protected
Central Inland Shale Band Vegetation	5.336	FFb 3	Least threatened	Fynbos Biome	Western Fynbos-Renosterveld Bioregion	Well protected
Matjiesfontein Shale Renosterveld	1.7728	FRs 6	Least threatened	Fynbos Biome	Western Fynbos-Renosterveld Bioregion	Poorly protected
Matjiesfontein Quartzite Fynbos	1.4141	FFq 3	Least threatened	Fynbos Biome	Western Fynbos-Renosterveld Bioregion	Poorly protected
Matjiesfontein Shale Renosterveld	0.3676	FRs 6	Least threatened	Fynbos Biome	Western Fynbos-Renosterveld Bioregion	Poorly protected
Central Inland Shale Band Vegetation	0.7955	FFb 3	Least threatened	Fynbos Biome	Western Fynbos-Renosterveld Bioregion	Well protected
Matjiesfontein Quartzite Fynbos	23.6335	FFq 3	Least threatened	Fynbos Biome	Western Fynbos-Renosterveld Bioregion	Poorly protected
Suurberg Quartzite Fynbos	1.0985	FFq 6	Least threatened	Fynbos Biome	Eastern Fynbos-Renosterveld Bioregion	Moderately protected
North Swartberg Sandstone Fynbos	1.1069	FFs 23	Least threatened	Fynbos Biome	Western Fynbos-Renosterveld Bioregion	Well protected
North Swartberg Sandstone Fynbos	14.3739	FFs 23	Least threatened	Fynbos Biome	Western Fynbos-Renosterveld Bioregion	Well protected
Suurberg Shale Fynbos	0.6298	FFh 10	Least threatened	Fynbos Biome	Eastern Fynbos-Renosterveld Bioregion	Well protected
Matjiesfontein Shale Renosterveld	0.2209	FRs 6	Least threatened	Fynbos Biome	Western Fynbos-Renosterveld Bioregion	Poorly protected
Central Inland Shale Band Vegetation	1.6265	FFb 3	Least threatened	Fynbos Biome	Western Fynbos-Renosterveld Bioregion	Well protected
Matjiesfontein Quartzite Fynbos	0.6228	FFq 3	Least threatened	Fynbos Biome	Western Fynbos-Renosterveld Bioregion	Poorly protected
Grootrivier Quartzite Fynbos	1.8999	FFq 5	Least threatened	Fynbos Biome	Eastern Fynbos-Renosterveld Bioregion	Not protected
Hawequas Sandstone Fynbos	997.419	FFs 10	Least threatened	Fynbos Biome	Southwest Fynbos Bioregion	Well protected
Matjiesfontein Shale Renosterveld	128.415	FRs 6	Least threatened	Fynbos Biome	Western Fynbos-Renosterveld Bioregion	Poorly protected
Southern Mistbelt Forest	1.5205	FOz 3	Least threatened	Forests	Zonal & Intrazonal Forests	Poorly protected
Matjiesfontein Shale Renosterveld	6.2598	FRs 6	Least threatened	Fynbos Biome	Western Fynbos-Renosterveld Bioregion	Poorly protected
Matjiesfontein Quartzite Fynbos	1.9464	FFq 3	Least threatened	Fynbos Biome	Western Fynbos-Renosterveld Bioregion	Poorly protected
Matjiesfontein Shale Renosterveld	21.8213	FRs 6	Least threatened	Fynbos Biome	Western Fynbos-Renosterveld Bioregion	Poorly protected
Matjiesfontein Quartzite Fynbos	12.0819	FFq 3	Least threatened	Fynbos Biome	Western Fynbos-Renosterveld Bioregion	Poorly protected
Suurberg Shale Fynbos	0.0656	FFh 10	Least threatened	Fynbos Biome	Eastern Fynbos-Renosterveld Bioregion	Well protected
Suurberg Quartzite Fynbos	48.1777	FFq 6	Least threatened	Fynbos Biome	Eastern Fynbos-Renosterveld Bioregion	Moderately protected
Matjiesfontein Shale Fynbos	3.0608	FFh 2	Least threatened	Fynbos Biome	Western Fynbos-Renosterveld Bioregion	Moderately protected
Suurberg Shale Fynbos	3.3999	FFh 10	Least threatened	Fynbos Biome	Eastern Fynbos-Renosterveld Bioregion	Well protected
Suurberg Quartzite Fynbos	118.163	FFq 6	Least threatened	Fynbos Biome	Eastern Fynbos-Renosterveld Bioregion	Moderately protected
Suurberg Quartzite Fynbos	15.568	FFq 6	Least threatened	Fynbos Biome	Eastern Fynbos-Renosterveld Bioregion	Moderately protected
Matjiesfontein Shale Fynbos	11.7054	FFh 2	Least threatened	Fynbos Biome	Western Fynbos-Renosterveld Bioregion	Moderately protected
Matjiesfontein Quartzite Fynbos	0.1063	FFq 3	Least threatened	Fynbos Biome	Western Fynbos-Renosterveld Bioregion	Poorly protected
Suurberg Quartzite Fynbos	0.7213	FFq 6	Least threatened	Fynbos Biome	Eastern Fynbos-Renosterveld Bioregion	Moderately protected
Matjiesfontein Shale Renosterveld	0.0749	FRs 6	Least threatened	Fynbos Biome	Western Fynbos-Renosterveld Bioregion	Poorly protected
Matjiesfontein Quartzite Fynbos	0.2028	FFq 3	Least threatened	Fynbos Biome	Western Fynbos-Renosterveld Bioregion	Poorly protected
Suurberg Quartzite Fynbos	1.4777	FFq 6	Least threatened	Fynbos Biome	Eastern Fynbos-Renosterveld Bioregion	Moderately protected
Suurberg Shale Fynbos	0.2433	FFh 10	Least threatened	Fynbos Biome	Eastern Fynbos-Renosterveld Bioregion	Well protected
Suurberg Quartzite Fynbos	0.1586	FFq 6	Least threatened	Fynbos Biome	Eastern Fynbos-Renosterveld Bioregion	Moderately protected
Matjiesfontein Shale Renosterveld	0.1881	FRs 6	Least threatened	Fynbos Biome	Western Fynbos-Renosterveld Bioregion	Poorly protected
Matjiesfontein Quartzite Fynbos	21.5626	FFq 3	Least threatened	Fynbos Biome	Western Fynbos-Renosterveld Bioregion	Poorly protected
Central Inland Shale Band Vegetation	0.8522	FFb 3	Least threatened	Fynbos Biome	Western Fynbos-Renosterveld Bioregion	Well protected
Central Inland Shale Band Vegetation	0.4022	FFb 3	Least threatened	Fynbos Biome	Western Fynbos-Renosterveld Bioregion	Well protected
Matjiesfontein Quartzite Fynbos	1.8625	FFq 3	Least threatened	Fynbos Biome	Western Fynbos-Renosterveld Bioregion	Poorly protected
North Swartberg Sandstone Fynbos	0.0781	FFs 23	Least threatened	Fynbos Biome	Western Fynbos-Renosterveld Bioregion	Well protected
Southern Mistbelt Forest	4.7752	FOz 3	Least threatened	Forests	Zonal & Intrazonal Forests	Poorly protected
Suurberg Shale Fynbos	0.0524	FFh 10	Least threatened	Fynbos Biome	Eastern Fynbos-Renosterveld Bioregion	Well protected
Sundays Thicket	444.928	AT 6	Least threatened	Albany Thicket Biome	Albany Thicket	Poorly protected
Suurberg Quartzite Fynbos	0.3707	FFq 6	Least threatened	Fynbos Biome	Eastern Fynbos-Renosterveld Bioregion	Moderately protected
Swartberg Altimontane Sandstone Fynbos	3.9732	FFs 31	Least threatened	Fynbos Biome	Western Fynbos-Renosterveld Bioregion	Well protected
Southern Mistbelt Forest	0.4337	FOz 3	Least threatened	Forests	Zonal & Intrazonal Forests	Poorly protected
North Swartberg Sandstone Fynbos	0.1248	FFs 23	Least threatened	Fynbos Biome	Western Fynbos-Renosterveld Bioregion	Well protected
North Swartberg Sandstone Fynbos	0.7082	FFs 23	Least threatened	Fynbos Biome	Western Fynbos-Renosterveld Bioregion	Well protected
Lower Karoo Gwarrieveld	0.1316	NKl 3	Least threatened	Nama-Karoo Biome	Lower Karoo Bioregion	Not protected
Suurberg Quartzite Fynbos	4.4927	FFq 6	Least threatened	Fynbos Biome	Eastern Fynbos-Renosterveld Bioregion	Moderately protected
Matjiesfontein Shale Renosterveld	3.8845	FRs 6	Least threatened	Fynbos Biome	Western Fynbos-Renosterveld Bioregion	Poorly protected
Matjiesfontein Shale Fynbos	30.8306	FFh 2	Least threatened	Fynbos Biome	Western Fynbos-Renosterveld Bioregion	Moderately protected
Suurberg Quartzite Fynbos	1.546	FFq 6	Least threatened	Fynbos Biome	Eastern Fynbos-Renosterveld Bioregion	Moderately protected
Matjiesfontein Shale Fynbos	5.2444	FFh 2	Least threatened	Fynbos Biome	Western Fynbos-Renosterveld Bioregion	Moderately protected
Matjiesfontein Shale Renosterveld	0.1172	FRs 6	Least threatened	Fynbos Biome	Western Fynbos-Renosterveld Bioregion	Poorly protected
North Swartberg Sandstone Fynbos	0.1619	FFs 23	Least threatened	Fynbos Biome	Western Fynbos-Renosterveld Bioregion	Well protected
Southern Karoo Riviere	0.2356	AZi 6	Least threatened	Azonal Vegetation	Inland Saline Vegetation	Hardly protected
Suurberg Quartzite Fynbos	0.1251	FFq 6	Least threatened	Fynbos Biome	Eastern Fynbos-Renosterveld Bioregion	Moderately protected
Swartberg Altimontane Sandstone Fynbos	0.4176	FFs 31	Least threatened	Fynbos Biome	Western Fynbos-Renosterveld Bioregion	Well protected
Suurberg Shale Fynbos	0.0876	FFh 10	Least threatened	Fynbos Biome	Eastern Fynbos-Renosterveld Bioregion	Well protected
Willowmore Gwarrieveld	149.874	SKv 12	Least threatened	Succulent Karoo Biome	Rainshadow Valley Karoo Bioregion	Hardly protected
Southern Mistbelt Forest	0.9982	FOz 3	Least threatened	Forests	Zonal & Intrazonal Forests	Poorly protected
South Swartberg Sandstone Fynbos	55.6079	FFs 24	Least threatened	Fynbos Biome	Western Fynbos-Renosterveld Bioregion	Well protected
Suurberg Quartzite Fynbos	33.3172	FFq 6	Least threatened	Fynbos Biome	Eastern Fynbos-Renosterveld Bioregion	Moderately protected
Suurberg Shale Fynbos	0.5081	FFh 10	Least threatened	Fynbos Biome	Eastern Fynbos-Renosterveld Bioregion	Well protected
Suurberg Shale Fynbos	0.0537	FFh 10	Least threatened	Fynbos Biome	Eastern Fynbos-Renosterveld Bioregion	Well protected
Matjiesfontein Quartzite Fynbos	162.529	FFq 3	Least threatened	Fynbos Biome	Western Fynbos-Renosterveld Bioregion	Poorly protected
Suurberg Shale Fynbos	0.1971	FFh 10	Least threatened	Fynbos Biome	Eastern Fynbos-Renosterveld Bioregion	Well protected
Matjiesfontein Quartzite Fynbos	1.359	FFq 3	Least threatened	Fynbos Biome	Western Fynbos-Renosterveld Bioregion	Poorly protected
Suurberg Shale Fynbos	5.5186	FFh 10	Least threatened	Fynbos Biome	Eastern Fynbos-Renosterveld Bioregion	Well protected
Suurberg Shale Fynbos	0.1047	FFh 10	Least threatened	Fynbos Biome	Eastern Fynbos-Renosterveld Bioregion	Well protected
Suurberg Shale Fynbos	0.3932	FFh 10	Least threatened	Fynbos Biome	Eastern Fynbos-Renosterveld Bioregion	Well protected
Matjiesfontein Shale Renosterveld	65.1535	FRs 6	Least threatened	Fynbos Biome	Western Fynbos-Renosterveld Bioregion	Poorly protected
Suurberg Shale Fynbos	1.932	FFh 10	Least threatened	Fynbos Biome	Eastern Fynbos-Renosterveld Bioregion	Well protected
Suurberg Shale Fynbos	0.1917	FFh 10	Least threatened	Fynbos Biome	Eastern Fynbos-Renosterveld Bioregion	Well protected
Grootrivier Quartzite Fynbos	23.9273	FFq 5	Least threatened	Fynbos Biome	Eastern Fynbos-Renosterveld Bioregion	Not protected
Suurberg Shale Fynbos	1.3096	FFh 10	Least threatened	Fynbos Biome	Eastern Fynbos-Renosterveld Bioregion	Well protected
Central Inland Shale Band Vegetation	34.775	FFb 3	Least threatened	Fynbos Biome	Western Fynbos-Renosterveld Bioregion	Well protected
Swartland Alluvium Fynbos	86.1714	FFa 3	Critically endangered	Fynbos Biome	Southwest Fynbos Bioregion	Poorly protected
Matjiesfontein Shale Renosterveld	0.1194	FRs 6	Least threatened	Fynbos Biome	Western Fynbos-Renosterveld Bioregion	Poorly protected
Bhisho Thornveld	0.1519	SVs 7	Least threatened	Savanna Biome	Sub-Escarpment Savanna Bioregion	Hardly protected
Suurberg Quartzite Fynbos	3.8971	FFq 6	Least threatened	Fynbos Biome	Eastern Fynbos-Renosterveld Bioregion	Moderately protected
Kowie Thicket	78.6846	AT 8	Least threatened	Albany Thicket Biome	Albany Thicket	Poorly protected
Suurberg Shale Fynbos	0.3105	FFh 10	Least threatened	Fynbos Biome	Eastern Fynbos-Renosterveld Bioregion	Well protected
Matjiesfontein Shale Renosterveld	0.2469	FRs 6	Least threatened	Fynbos Biome	Western Fynbos-Renosterveld Bioregion	Poorly protected
Albany Alluvial Vegetation	350.427	AZa 6	Endangered	Azonal Vegetation	Alluvial Vegetation	Poorly protected
South Swartberg Sandstone Fynbos	638.149	FFs 24	Least threatened	Fynbos Biome	Western Fynbos-Renosterveld Bioregion	Well protected
Suurberg Shale Fynbos	0.7539	FFh 10	Least threatened	Fynbos Biome	Eastern Fynbos-Renosterveld Bioregion	Well protected
Central Inland Shale Band Vegetation	2.1891	FFb 3	Least threatened	Fynbos Biome	Western Fynbos-Renosterveld Bioregion	Well protected
Suurberg Quartzite Fynbos	9.6531	FFq 6	Least threatened	Fynbos Biome	Eastern Fynbos-Renosterveld Bioregion	Moderately protected
Suurberg Shale Fynbos	7.2573	FFh 10	Least threatened	Fynbos Biome	Eastern Fynbos-Renosterveld Bioregion	Well protected
Suurberg Quartzite Fynbos	0.1108	FFq 6	Least threatened	Fynbos Biome	Eastern Fynbos-Renosterveld Bioregion	Moderately protected
Matjiesfontein Shale Renosterveld	0.1708	FRs 6	Least threatened	Fynbos Biome	Western Fynbos-Renosterveld Bioregion	Poorly protected
Gamka Thicket	0.4528	AT 2	Least threatened	Albany Thicket Biome	Albany Thicket	Poorly protected
Bhisho Thornveld	4.2632	SVs 7	Least threatened	Savanna Biome	Sub-Escarpment Savanna Bioregion	Hardly protected
Suurberg Quartzite Fynbos	0.696	FFq 6	Least threatened	Fynbos Biome	Eastern Fynbos-Renosterveld Bioregion	Moderately protected
Gamka Thicket	0.3963	AT 2	Least threatened	Albany Thicket Biome	Albany Thicket	Poorly protected
Matjiesfontein Quartzite Fynbos	1.3753	FFq 3	Least threatened	Fynbos Biome	Western Fynbos-Renosterveld Bioregion	Poorly protected
Western Coastal Shale Band Vegetation	0.8974	FFb 2	Least threatened	Fynbos Biome	Southwest Fynbos Bioregion	Well protected
Matjiesfontein Shale Fynbos	10.4002	FFh 2	Least threatened	Fynbos Biome	Western Fynbos-Renosterveld Bioregion	Moderately protected
Matjiesfontein Shale Renosterveld	12.3724	FRs 6	Least threatened	Fynbos Biome	Western Fynbos-Renosterveld Bioregion	Poorly protected
Gamka Thicket	0.2397	AT 2	Least threatened	Albany Thicket Biome	Albany Thicket	Poorly protected
Albany Coastal Belt	401.232	AT 9	Least threatened	Albany Thicket Biome	Albany Thicket	Poorly protected
Southern Mistbelt Forest	3.1307	FOz 3	Least threatened	Forests	Zonal & Intrazonal Forests	Poorly protected
Suurberg Quartzite Fynbos	0.2164	FFq 6	Least threatened	Fynbos Biome	Eastern Fynbos-Renosterveld Bioregion	Moderately protected
Kouebokkeveld Shale Fynbos	37.6718	FFh 1	Endangered	Fynbos Biome	Northwest Fynbos Bioregion	Not protected
Kouga Grassy Sandstone Fynbos	6.9337	FFs 28	Least threatened	Fynbos Biome	Eastern Fynbos-Renosterveld Bioregion	Moderately protected
Bhisho Thornveld	17.0431	SVs 7	Least threatened	Savanna Biome	Sub-Escarpment Savanna Bioregion	Hardly protected
Breede Alluvium Fynbos	21.0544	FFa 2	Endangered	Fynbos Biome	Southwest Fynbos Bioregion	Hardly protected
North Swartberg Sandstone Fynbos	6.1865	FFs 23	Least threatened	Fynbos Biome	Western Fynbos-Renosterveld Bioregion	Well protected
Suurberg Shale Fynbos	0.6554	FFh 10	Least threatened	Fynbos Biome	Eastern Fynbos-Renosterveld Bioregion	Well protected
Gamka Thicket	1.5175	AT 2	Least threatened	Albany Thicket Biome	Albany Thicket	Poorly protected
Matjiesfontein Quartzite Fynbos	6.2386	FFq 3	Least threatened	Fynbos Biome	Western Fynbos-Renosterveld Bioregion	Poorly protected
Western Altimontane Sandstone Fynbos	14.5581	FFs 30	Least threatened	Fynbos Biome	Northwest Fynbos Bioregion	Well protected
Suurberg Shale Fynbos	7.4181	FFh 10	Least threatened	Fynbos Biome	Eastern Fynbos-Renosterveld Bioregion	Well protected
Matjiesfontein Shale Renosterveld	3.5791	FRs 6	Least threatened	Fynbos Biome	Western Fynbos-Renosterveld Bioregion	Poorly protected
Swartberg Altimontane Sandstone Fynbos	0.3435	FFs 31	Least threatened	Fynbos Biome	Western Fynbos-Renosterveld Bioregion	Well protected
Suurberg Quartzite Fynbos	2.085	FFq 6	Least threatened	Fynbos Biome	Eastern Fynbos-Renosterveld Bioregion	Moderately protected
Swartberg Altimontane Sandstone Fynbos	0.3482	FFs 31	Least threatened	Fynbos Biome	Western Fynbos-Renosterveld Bioregion	Well protected
Matjiesfontein Shale Renosterveld	0.6047	FRs 6	Least threatened	Fynbos Biome	Western Fynbos-Renosterveld Bioregion	Poorly protected
Matjiesfontein Shale Renosterveld	19.6998	FRs 6	Least threatened	Fynbos Biome	Western Fynbos-Renosterveld Bioregion	Poorly protected
Suurberg Shale Fynbos	0.0717	FFh 10	Least threatened	Fynbos Biome	Eastern Fynbos-Renosterveld Bioregion	Well protected
Suurberg Quartzite Fynbos	1.5394	FFq 6	Least threatened	Fynbos Biome	Eastern Fynbos-Renosterveld Bioregion	Moderately protected
South Swartberg Sandstone Fynbos	23.9791	FFs 24	Least threatened	Fynbos Biome	Western Fynbos-Renosterveld Bioregion	Well protected
Swartberg Altimontane Sandstone Fynbos	0.36	FFs 31	Least threatened	Fynbos Biome	Western Fynbos-Renosterveld Bioregion	Well protected
Uniondale Shale Renosterveld	2.8155	FRs 16	Least threatened	Fynbos Biome	Eastern Fynbos-Renosterveld Bioregion	Hardly protected
Sundays Thicket	2178.9	AT 6	Least threatened	Albany Thicket Biome	Albany Thicket	Poorly protected
Matjiesfontein Quartzite Fynbos	2.3012	FFq 3	Least threatened	Fynbos Biome	Western Fynbos-Renosterveld Bioregion	Poorly protected
North Swartberg Sandstone Fynbos	0.1069	FFs 23	Least threatened	Fynbos Biome	Western Fynbos-Renosterveld Bioregion	Well protected
Matjiesfontein Shale Renosterveld	0.6113	FRs 6	Least threatened	Fynbos Biome	Western Fynbos-Renosterveld Bioregion	Poorly protected
Swartberg Altimontane Sandstone Fynbos	1.3717	FFs 31	Least threatened	Fynbos Biome	Western Fynbos-Renosterveld Bioregion	Well protected
Suurberg Shale Fynbos	10.9299	FFh 10	Least threatened	Fynbos Biome	Eastern Fynbos-Renosterveld Bioregion	Well protected
Suurberg Quartzite Fynbos	1.1889	FFq 6	Least threatened	Fynbos Biome	Eastern Fynbos-Renosterveld Bioregion	Moderately protected
Matjiesfontein Quartzite Fynbos	0.107	FFq 3	Least threatened	Fynbos Biome	Western Fynbos-Renosterveld Bioregion	Poorly protected
Suurberg Shale Fynbos	0.3537	FFh 10	Least threatened	Fynbos Biome	Eastern Fynbos-Renosterveld Bioregion	Well protected
Suurberg Quartzite Fynbos	0.6917	FFq 6	Least threatened	Fynbos Biome	Eastern Fynbos-Renosterveld Bioregion	Moderately protected
Suurberg Shale Fynbos	10.2786	FFh 10	Least threatened	Fynbos Biome	Eastern Fynbos-Renosterveld Bioregion	Well protected
Suurberg Shale Fynbos	0.4612	FFh 10	Least threatened	Fynbos Biome	Eastern Fynbos-Renosterveld Bioregion	Well protected
Bhisho Thornveld	202.049	SVs 7	Least threatened	Savanna Biome	Sub-Escarpment Savanna Bioregion	Hardly protected
Northern Inland Shale Band Vegetation	0.6897	FFb 1	Least threatened	Fynbos Biome	Northwest Fynbos Bioregion	Moderately protected
Swartberg Shale Renosterveld	18.7091	FRs 15	Least threatened	Fynbos Biome	Western Fynbos-Renosterveld Bioregion	Poorly protected
Suurberg Shale Fynbos	0.1376	FFh 10	Least threatened	Fynbos Biome	Eastern Fynbos-Renosterveld Bioregion	Well protected
Matjiesfontein Shale Fynbos	1.5942	FFh 2	Least threatened	Fynbos Biome	Western Fynbos-Renosterveld Bioregion	Moderately protected
Matjiesfontein Quartzite Fynbos	0.0761	FFq 3	Least threatened	Fynbos Biome	Western Fynbos-Renosterveld Bioregion	Poorly protected
Southern Mistbelt Forest	4.0384	FOz 3	Least threatened	Forests	Zonal & Intrazonal Forests	Poorly protected
Matjiesfontein Shale Renosterveld	0.7612	FRs 6	Least threatened	Fynbos Biome	Western Fynbos-Renosterveld Bioregion	Poorly protected
[truncated: 1,481 more rows]
